# Supplementary material
Source: publisher figshare collection journal article supplement (https://acs.figshare.com/ndownloader/files/5353387)
Supplement: Supplementary file 1 [file 5353387]

data_global

_publ_contact_author_name     'Zeller, Matthias'
_publ_contact_author_address
;       Department of Chemistry
        Purdue University
        560 Oval Dr.
        W. Lafayette
        IN 47907-2084
        USA
;
_publ_contact_author_email      'zeller4@purdue.edu'
_publ_contact_author_fax        '1(765)4940239'
_publ_contact_author_phone      '1(765)4944572'


# The loop structure below should contain the names and addresses and footnotes
# of all authors, in the relevant order of publication. Repeat as necessary

loop_
_publ_author_name
_publ_author_address
_publ_author_footnote

        'Zeller, Matthias'
;       Department of Chemistry
        Purdue University
        560 Oval Dr.
        W. Lafayette
        IN 47907-2084
        USA
;
;?
;

        'Natoli, Sean'
;       Department of Chemistry
        Purdue University
        560 Oval Dr.
        W. Lafayette
        IN 47907-2084
        USA
;
;?
;

        'Ren, Tong'
;       Department of Chemistry
        Purdue University
        560 Oval Dr.
        W. Lafayette
        IN 47907-2084
        USA
;
;?
;

_publ_section_references
;
Allen, F. H., Johnson, O., Shields, G. P., Smith, B. R., Towler, M. (2004). 
J. Appl. Cryst., 37, 335--338.

H�bschle, C. B., Sheldrick, G. M. and Dittrich, B. (2011). J. Appl. Cryst., 
44, 1281--1284.

Nonius (1998). Collect Users Manual, Nonius Delft, The Netherlands.

Otwinowski Z. & Minor, W. (1997). Methods Enzymol., 276, 307--327.

Prince, E. and Nicholson, W. L. (1983). Acta Cryst., A39, 407--410.

Rigaku Corp. (2001). CrystalClear, The Woodlands, Texas, USA.

Sheldrick, G.M. (2008). Acta Cryst., A64, 112--122.

Sheldrick, G. M. (2013). SHELXL2013. University of G\"ottingen, Germany.

Spek, A. L. (2003). J. Appl. Cryst., 36, 7--13.

CSD: Groom, C. R. & Allen, F. H. (2014). Angew. Chem. Int. Ed., 53, 662--671.

Publcif: Westrip, S. P. (2010). J. Appl. Cryst., 43, 920-�925.
;
 
data_SN221D
 
_audit_creation_method            'SHELXL-2014/7'
_shelx_SHELXL_version_number      '2014/7'
_chemical_name_systematic         ?
_chemical_name_common             ?
_chemical_melting_point           ?
_chemical_formula_moiety          
 'C20 H34 Cl Co N5, 2(C H4 O), Cl'
_chemical_formula_sum
 'C22 H42 Cl2 Co N5 O2' 
_chemical_formula_weight          538.43

loop_
 _atom_type_symbol
 _atom_type_description
 _atom_type_scat_dispersion_real
 _atom_type_scat_dispersion_imag
 _atom_type_scat_source
 'C'  'C'   0.0033   0.0016
 'International Tables Vol C Tables 4.2.6.8 and 6.1.1.4'
 'H'  'H'   0.0000   0.0000
 'International Tables Vol C Tables 4.2.6.8 and 6.1.1.4'
 'N'  'N'   0.0061   0.0033
 'International Tables Vol C Tables 4.2.6.8 and 6.1.1.4'
 'Cl'  'Cl'   0.1484   0.1585
 'International Tables Vol C Tables 4.2.6.8 and 6.1.1.4'
 'Co'  'Co'   0.3494   0.9721
 'International Tables Vol C Tables 4.2.6.8 and 6.1.1.4'
 'O'  'O'   0.0106   0.0060
 'International Tables Vol C Tables 4.2.6.8 and 6.1.1.4'
 
_space_group_crystal_system       monoclinic
_space_group_IT_number            14
_space_group_name_H-M_alt         'P 21/n'
_space_group_name_Hall            '-P 2yn'
 
_shelx_space_group_comment
;
The symmetry employed for this shelxl refinement is uniquely defined
by the following loop, which should always be used as a source of
symmetry information in preference to the above space-group names.
They are only intended as comments.
;
 
loop_
 _space_group_symop_operation_xyz
 'x, y, z'
 '-x+1/2, y+1/2, -z+1/2'
 '-x, -y, -z'
 'x-1/2, -y-1/2, z-1/2'
 
_cell_length_a                    10.3649(2)
_cell_length_b                    19.2578(5)
_cell_length_c                    12.8446(3)
_cell_angle_alpha                 90
_cell_angle_beta                  97.7118(19)
_cell_angle_gamma                 90
_cell_volume                      2540.66(10)
_cell_formula_units_Z             4
_cell_measurement_temperature     100(2)
_cell_measurement_reflns_used     25671
_cell_measurement_theta_min       1.918
_cell_measurement_theta_max       30.515
 
_exptl_crystal_description        rod
_exptl_crystal_colour             red
_exptl_crystal_density_meas       ?
_exptl_crystal_density_method     ?
_exptl_crystal_density_diffrn     1.408          
_exptl_crystal_F_000              1144
_exptl_transmission_factor_min    ?
_exptl_transmission_factor_max    ?
_exptl_crystal_size_max           0.350
_exptl_crystal_size_mid           0.190
_exptl_crystal_size_min           0.180
_exptl_absorpt_coefficient_mu     0.914
_shelx_estimated_absorpt_T_min    0.740
_shelx_estimated_absorpt_T_max    0.853
_exptl_absorpt_correction_type    'multi-scan'
_exptl_absorpt_correction_T_min   0.697
_exptl_absorpt_correction_T_max   0.853 
_exptl_absorpt_process_details    'SCALEPACK (Otwinowski & Minor, 1997)'
_exptl_absorpt_special_details    ?
_diffrn_ambient_temperature       100(2)
_diffrn_radiation_wavelength      0.71073
_diffrn_radiation_type            MoK\a
_diffrn_source                    'fine focus X-ray tube'
_diffrn_radiation_monochromator   'graphite'
_diffrn_measurement_device_type   'Nonius Kappa CCD diffractometer'
_diffrn_measurement_method        '\w and \f scans'
_diffrn_detector_area_resol_mean  ?
_diffrn_reflns_number             25661
_diffrn_reflns_av_unetI/netI      0.0461
_diffrn_reflns_av_R_equivalents   0.0507
_diffrn_reflns_limit_h_min        -11
_diffrn_reflns_limit_h_max        13
_diffrn_reflns_limit_k_min        -23
_diffrn_reflns_limit_k_max        26
_diffrn_reflns_limit_l_min        -13
_diffrn_reflns_limit_l_max        16
_diffrn_reflns_theta_min          1.918
_diffrn_reflns_theta_max          30.515
_diffrn_reflns_theta_full         25.242
_diffrn_measured_fraction_theta_max   0.873
_diffrn_measured_fraction_theta_full  0.999
_diffrn_reflns_Laue_measured_fraction_max    0.873
_diffrn_reflns_Laue_measured_fraction_full   0.999
_diffrn_reflns_point_group_measured_fraction_max   0.873
_diffrn_reflns_point_group_measured_fraction_full  0.999
_reflns_number_total              6771
_reflns_number_gt                 5288
_reflns_threshold_expression      'I > 2\s(I)'
_reflns_Friedel_coverage          0.000
_reflns_Friedel_fraction_max      .
_reflns_Friedel_fraction_full     .
 
_reflns_special_details
;
 Reflections were merged by SHELXL according to the crystal
 class for the calculation of statistics and refinement.
 
 _reflns_Friedel_fraction is defined as the number of unique
 Friedel pairs measured divided by the number that would be
 possible theoretically, ignoring centric projections and
 systematic absences.
;
 
_computing_data_collection        'Nonius Collect (Nonius, 1998)' 
_computing_cell_refinement        'HKL3000 (Otwinowski & Minor, 1997)' 
_computing_data_reduction         'HKL3000 (Otwinowski & Minor, 1997)'
_computing_structure_solution     'SHELXS-97 (Sheldrick, 2008)' 
_computing_structure_refinement   
;  
SHELXL-2014/7 (Sheldrick, 2014), 
SHELXLE Rev714 (H\"ubschle et al., 2011)
; 
_computing_molecular_graphics     ?
_computing_publication_material   ?
_refine_special_details           ?
_refine_ls_structure_factor_coef  Fsqd
_refine_ls_matrix_type            full
_refine_ls_weighting_scheme       calc
_refine_ls_weighting_details
'w=1/[\s^2^(Fo^2^)+(0.0341P)^2^+0.2295P] where P=(Fo^2^+2Fc^2^)/3'
_atom_sites_solution_primary      direct 
_atom_sites_solution_secondary    difmap
_atom_sites_solution_hydrogens    geom
_refine_ls_hydrogen_treatment     constr
_refine_ls_extinction_method      none
_refine_ls_extinction_coef        .
_refine_ls_number_reflns          6771
_refine_ls_number_parameters      296
_refine_ls_number_restraints      0
_refine_ls_R_factor_all           0.0468
_refine_ls_R_factor_gt            0.0313
_refine_ls_wR_factor_ref          0.0764
_refine_ls_wR_factor_gt           0.0725
_refine_ls_goodness_of_fit_ref    1.060
_refine_ls_restrained_S_all       1.060
_refine_ls_shift/su_max           0.002
_refine_ls_shift/su_mean          0.000
 
loop_
 _atom_site_label
 _atom_site_type_symbol
 _atom_site_fract_x
 _atom_site_fract_y
 _atom_site_fract_z
 _atom_site_U_iso_or_equiv
 _atom_site_adp_type
 _atom_site_occupancy
 _atom_site_site_symmetry_order  
 _atom_site_calc_flag
 _atom_site_refinement_flags_posn
 _atom_site_refinement_flags_adp
 _atom_site_refinement_flags_occupancy
 _atom_site_disorder_assembly
 _atom_site_disorder_group
C1 C 0.69510(14) 0.76234(8) 0.51106(10) 0.0144(3) Uani 1 1 d . . . . .
C2 C 0.78250(15) 0.80260(8) 0.53505(11) 0.0162(3) Uani 1 1 d . . . . .
C3 C 0.89113(14) 0.85000(8) 0.55346(11) 0.0151(3) Uani 1 1 d . . . . .
C4 C 0.90866(15) 0.89674(8) 0.63727(10) 0.0160(3) Uani 1 1 d . . . . .
H4 H 0.8482 0.8967 0.6867 0.019 Uiso 1 1 calc R U . . .
C5 C 1.01188(15) 0.94314(8) 0.65025(11) 0.0161(3) Uani 1 1 d . . . . .
H5 H 1.0205 0.9741 0.7083 0.019 Uiso 1 1 calc R U . . .
C6 C 1.10448(14) 0.94538(8) 0.57902(11) 0.0158(3) Uani 1 1 d . . . . .
C7 C 1.08867(15) 0.89620(8) 0.49697(11) 0.0169(3) Uani 1 1 d . . . . .
H7 H 1.1507 0.8946 0.4489 0.020 Uiso 1 1 calc R U . . .
C8 C 0.98579(15) 0.85044(8) 0.48473(11) 0.0177(3) Uani 1 1 d . . . . .
H8 H 0.9785 0.8182 0.4282 0.021 Uiso 1 1 calc R U . . .
C9 C 1.23020(17) 1.03805(9) 0.67696(12) 0.0250(4) Uani 1 1 d . . . . .
H9A H 1.2910 1.0746 0.6624 0.037 Uiso 1 1 calc R U . . .
H9B H 1.2690 1.0106 0.7375 0.037 Uiso 1 1 calc R U . . .
H9C H 1.1489 1.0592 0.6926 0.037 Uiso 1 1 calc R U . . .
C10 C 1.30363(16) 0.98873(9) 0.51868(12) 0.0247(4) Uani 1 1 d . . . . .
H10A H 1.2632 0.9865 0.4453 0.037 Uiso 1 1 calc R U . . .
H10B H 1.3555 0.9467 0.5360 0.037 Uiso 1 1 calc R U . . .
H10C H 1.3602 1.0296 0.5288 0.037 Uiso 1 1 calc R U . . .
C11 C 0.74018(15) 0.65992(8) 0.32093(11) 0.0179(3) Uani 1 1 d . . . . .
H11A H 0.8112 0.6934 0.3428 0.021 Uiso 1 1 calc R U . . .
H11B H 0.7471 0.6445 0.2484 0.021 Uiso 1 1 calc R U . . .
C12 C 0.75029(15) 0.59863(8) 0.39424(11) 0.0186(3) Uani 1 1 d . . . . .
H12A H 0.6860 0.5626 0.3677 0.022 Uiso 1 1 calc R U . . .
H12B H 0.8385 0.5781 0.4000 0.022 Uiso 1 1 calc R U . . .
C13 C 0.71597(15) 0.56530(8) 0.57149(11) 0.0189(3) Uani 1 1 d . . . . .
H13A H 0.8003 0.5404 0.5811 0.023 Uiso 1 1 calc R U . . .
H13B H 0.6483 0.5325 0.5399 0.023 Uiso 1 1 calc R U . . .
C14 C 0.68371(15) 0.58859(8) 0.67819(11) 0.0199(3) Uani 1 1 d . . . . .
H14A H 0.6927 0.5484 0.7267 0.024 Uiso 1 1 calc R U . . .
H14B H 0.7477 0.6241 0.7070 0.024 Uiso 1 1 calc R U . . .
C15 C 0.54785(15) 0.61837(8) 0.67480(11) 0.0181(3) Uani 1 1 d . . . . .
H15A H 0.4839 0.5852 0.6388 0.022 Uiso 1 1 calc R U . . .
H15B H 0.5279 0.6247 0.7475 0.022 Uiso 1 1 calc R U . . .
C16 C 0.40268(15) 0.71490(8) 0.61946(11) 0.0175(3) Uani 1 1 d . . . . .
H16A H 0.3892 0.7283 0.6917 0.021 Uiso 1 1 calc R U . . .
H16B H 0.3360 0.6801 0.5930 0.021 Uiso 1 1 calc R U . . .
C17 C 0.39216(15) 0.77780(8) 0.54884(11) 0.0183(3) Uani 1 1 d . . . . .
H17A H 0.3021 0.7961 0.5399 0.022 Uiso 1 1 calc R U . . .
H17B H 0.4518 0.8148 0.5796 0.022 Uiso 1 1 calc R U . . .
C18 C 0.44253(16) 0.81586(8) 0.37783(11) 0.0183(3) Uani 1 1 d . . . . .
H18A H 0.5153 0.8452 0.4106 0.022 Uiso 1 1 calc R U . . .
H18B H 0.3619 0.8440 0.3714 0.022 Uiso 1 1 calc R U . . .
C19 C 0.46888(15) 0.79355(9) 0.26879(11) 0.0198(3) Uani 1 1 d . . . . .
H19A H 0.4004 0.7604 0.2395 0.024 Uiso 1 1 calc R U . . .
H19B H 0.4628 0.8348 0.2224 0.024 Uiso 1 1 calc R U . . .
C20 C 0.60100(15) 0.75983(8) 0.26786(11) 0.0182(3) Uani 1 1 d . . . . .
H20A H 0.6155 0.7517 0.1942 0.022 Uiso 1 1 calc R U . . .
H20B H 0.6697 0.7918 0.3002 0.022 Uiso 1 1 calc R U . . .
C21 C 0.09358(18) 0.59380(10) 0.53670(14) 0.0330(4) Uani 1 1 d . . . . .
H21A H 0.1857 0.6033 0.5330 0.049 Uiso 0.61(2) 1 calc R U P . .
H21B H 0.0597 0.5622 0.4796 0.049 Uiso 0.61(2) 1 calc R U P . .
H21C H 0.0844 0.5722 0.6044 0.049 Uiso 0.61(2) 1 calc R U P . .
H21D H 0.0342 0.5552 0.5450 0.049 Uiso 0.39(2) 1 calc R U P . .
H21E H 0.1602 0.5963 0.5984 0.049 Uiso 0.39(2) 1 calc R U P . .
H21F H 0.1355 0.5863 0.4736 0.049 Uiso 0.39(2) 1 calc R U P . .
C22 C 0.0818(2) 0.55101(12) 0.22705(17) 0.0462(5) Uani 1 1 d . . . . .
H22A H 0.1125 0.5655 0.1615 0.069 Uiso 1 1 calc R U . . .
H22B H 0.0502 0.5030 0.2202 0.069 Uiso 1 1 calc R U . . .
H22C H 0.1536 0.5540 0.2848 0.069 Uiso 1 1 calc R U . . .
N1 N 1.20330(13) 0.99356(7) 0.58654(9) 0.0209(3) Uani 1 1 d . . . . .
N2 N 0.72382(12) 0.62449(7) 0.49862(9) 0.0152(3) Uani 1 1 d . . . . .
H2N H 0.8013 0.6526 0.5281 0.018 Uiso 1 1 calc R U . . .
N3 N 0.53491(12) 0.68582(6) 0.61922(9) 0.0148(3) Uani 1 1 d . . . . .
H3N H 0.5964 0.7185 0.6610 0.018 Uiso 1 1 calc R U . . .
N4 N 0.42827(12) 0.75523(6) 0.44587(8) 0.0146(3) Uani 1 1 d . . . . .
H4N H 0.3528 0.7279 0.4106 0.017 Uiso 1 1 calc R U . . .
N5 N 0.61177(12) 0.69307(6) 0.32553(9) 0.0145(3) Uani 1 1 d . . . . .
H5N H 0.5463 0.6616 0.2855 0.017 Uiso 1 1 calc R U . . .
Cl1 Cl 0.13259(4) 0.72672(2) 0.33170(3) 0.02113(9) Uani 1 1 d . . . . .
Cl2 Cl 0.43212(4) 0.59955(2) 0.42348(3) 0.01686(8) Uani 1 1 d . . . . .
Co1 Co 0.57522(2) 0.68979(2) 0.47306(2) 0.01234(6) Uani 1 1 d . . . . .
O1 O 0.02248(12) 0.65690(6) 0.52659(8) 0.0275(3) Uani 1 1 d . . . . .
H1 H 0.0476 0.6810 0.4787 0.041 Uiso 1 1 calc R U . . .
O2 O -0.01744(13) 0.59372(7) 0.24753(12) 0.0436(4) Uani 1 1 d . . . . .
H2 H 0.0137 0.6310 0.2740 0.065 Uiso 1 1 calc R U . . .
 
loop_
 _atom_site_aniso_label
 _atom_site_aniso_U_11
 _atom_site_aniso_U_22
 _atom_site_aniso_U_33
 _atom_site_aniso_U_23
 _atom_site_aniso_U_13
 _atom_site_aniso_U_12
C1 0.0144(7) 0.0161(8) 0.0129(7) 0.0015(6) 0.0027(5) 0.0023(6)
C2 0.0193(8) 0.0167(8) 0.0123(7) 0.0015(6) 0.0016(6) 0.0023(6)
C3 0.0148(8) 0.0131(7) 0.0168(7) 0.0032(6) -0.0002(5) 0.0000(6)
C4 0.0176(8) 0.0169(8) 0.0134(7) 0.0021(6) 0.0018(5) -0.0002(6)
C5 0.0184(8) 0.0145(7) 0.0145(7) -0.0007(6) -0.0010(5) 0.0003(6)
C6 0.0147(8) 0.0140(7) 0.0178(7) 0.0026(6) -0.0012(6) -0.0007(6)
C7 0.0156(8) 0.0176(8) 0.0180(7) 0.0009(6) 0.0047(6) -0.0004(6)
C8 0.0190(8) 0.0168(8) 0.0169(7) -0.0020(6) 0.0009(6) 0.0000(6)
C9 0.0256(9) 0.0228(9) 0.0261(8) -0.0033(7) 0.0020(6) -0.0084(7)
C10 0.0193(9) 0.0255(9) 0.0298(9) 0.0002(7) 0.0058(7) -0.0061(7)
C11 0.0150(8) 0.0207(8) 0.0186(7) -0.0016(6) 0.0048(6) 0.0012(6)
C12 0.0184(8) 0.0181(8) 0.0201(7) -0.0021(6) 0.0049(6) 0.0020(6)
C13 0.0184(8) 0.0140(8) 0.0243(8) 0.0035(6) 0.0029(6) 0.0011(6)
C14 0.0205(8) 0.0195(8) 0.0191(7) 0.0049(6) 0.0007(6) -0.0008(7)
C15 0.0199(8) 0.0194(8) 0.0150(7) 0.0028(6) 0.0024(6) -0.0028(7)
C16 0.0138(8) 0.0233(8) 0.0158(7) -0.0008(6) 0.0040(5) 0.0011(6)
C17 0.0179(8) 0.0212(8) 0.0163(7) -0.0022(6) 0.0039(6) 0.0032(7)
C18 0.0182(8) 0.0159(8) 0.0207(8) 0.0013(6) 0.0019(6) 0.0018(6)
C19 0.0202(8) 0.0220(8) 0.0171(7) 0.0049(6) 0.0017(6) 0.0021(7)
C20 0.0192(8) 0.0198(8) 0.0160(7) 0.0033(6) 0.0039(6) -0.0009(7)
C21 0.0242(10) 0.0347(11) 0.0400(10) 0.0053(8) 0.0041(8) 0.0020(8)
C22 0.0306(12) 0.0432(13) 0.0638(13) -0.0198(11) 0.0023(9) 0.0101(10)
N1 0.0187(7) 0.0189(7) 0.0255(7) -0.0043(5) 0.0045(5) -0.0058(6)
N2 0.0149(7) 0.0138(6) 0.0168(6) 0.0001(5) 0.0023(5) -0.0005(5)
N3 0.0133(6) 0.0155(7) 0.0153(6) 0.0007(5) 0.0010(5) -0.0021(5)
N4 0.0139(6) 0.0166(7) 0.0133(6) 0.0000(5) 0.0019(4) 0.0003(5)
N5 0.0145(6) 0.0152(6) 0.0142(6) -0.0007(5) 0.0028(5) -0.0006(5)
Cl1 0.0189(2) 0.0248(2) 0.01935(18) 0.00284(15) 0.00109(14) 0.00200(16)
Cl2 0.01610(19) 0.01673(18) 0.01748(17) -0.00123(14) 0.00131(13) -0.00443(15)
Co1 0.01185(11) 0.01271(11) 0.01244(10) -0.00022(7) 0.00154(7) -0.00152(8)
O1 0.0317(7) 0.0279(7) 0.0247(6) 0.0015(5) 0.0101(5) 0.0001(6)
O2 0.0266(8) 0.0395(9) 0.0649(9) -0.0161(7) 0.0070(6) 0.0013(7)
 
_geom_special_details
;
 All esds (except the esd in the dihedral angle between two l.s. planes)
 are estimated using the full covariance matrix.  The cell esds are taken
 into account individually in the estimation of esds in distances, angles
 and torsion angles; correlations between esds in cell parameters are only
 used when they are defined by crystal symmetry.  An approximate (isotropic)
 treatment of cell esds is used for estimating esds involving l.s. planes.
;
 
loop_
 _geom_bond_atom_site_label_1
 _geom_bond_atom_site_label_2
 _geom_bond_distance
 _geom_bond_site_symmetry_2
 _geom_bond_publ_flag
C1 C2 1.201(2) . ?
C1 Co1 1.8898(15) . ?
C2 C3 1.444(2) . ?
C3 C4 1.396(2) . ?
C3 C8 1.405(2) . ?
C4 C5 1.387(2) . ?
C4 H4 0.9500 . ?
C5 C6 1.413(2) . ?
C5 H5 0.9500 . ?
C6 N1 1.3758(19) . ?
C6 C7 1.410(2) . ?
C7 C8 1.376(2) . ?
C7 H7 0.9500 . ?
C8 H8 0.9500 . ?
C9 N1 1.4400(19) . ?
C9 H9A 0.9800 . ?
C9 H9B 0.9800 . ?
C9 H9C 0.9800 . ?
C10 N1 1.4468(19) . ?
C10 H10A 0.9800 . ?
C10 H10B 0.9800 . ?
C10 H10C 0.9800 . ?
C11 N5 1.4845(19) . ?
C11 C12 1.505(2) . ?
C11 H11A 0.9900 . ?
C11 H11B 0.9900 . ?
C12 N2 1.4897(18) . ?
C12 H12A 0.9900 . ?
C12 H12B 0.9900 . ?
C13 N2 1.4842(18) . ?
C13 C14 1.521(2) . ?
C13 H13A 0.9900 . ?
C13 H13B 0.9900 . ?
C14 C15 1.516(2) . ?
C14 H14A 0.9900 . ?
C14 H14B 0.9900 . ?
C15 N3 1.4795(19) . ?
C15 H15A 0.9900 . ?
C15 H15B 0.9900 . ?
C16 N3 1.4809(18) . ?
C16 C17 1.508(2) . ?
C16 H16A 0.9900 . ?
C16 H16B 0.9900 . ?
C17 N4 1.4869(17) . ?
C17 H17A 0.9900 . ?
C17 H17B 0.9900 . ?
C18 N4 1.4777(18) . ?
C18 C19 1.524(2) . ?
C18 H18A 0.9900 . ?
C18 H18B 0.9900 . ?
C19 C20 1.517(2) . ?
C19 H19A 0.9900 . ?
C19 H19B 0.9900 . ?
C20 N5 1.4806(19) . ?
C20 H20A 0.9900 . ?
C20 H20B 0.9900 . ?
C21 O1 1.418(2) . ?
C21 H21A 0.9800 . ?
C21 H21B 0.9800 . ?
C21 H21C 0.9800 . ?
C21 H21D 0.9800 . ?
C21 H21E 0.9800 . ?
C21 H21F 0.9800 . ?
C22 O2 1.370(2) . ?
C22 H22A 0.9800 . ?
C22 H22B 0.9800 . ?
C22 H22C 0.9800 . ?
N2 Co1 1.9812(12) . ?
N2 H2N 1.0000 . ?
N3 Co1 1.9788(11) . ?
N3 H3N 1.0000 . ?
N4 Co1 1.9716(12) . ?
N4 H4N 1.0000 . ?
N5 Co1 1.9827(11) . ?
N5 H5N 1.0000 . ?
Cl2 Co1 2.3177(4) . ?
O1 H1 0.8400 . ?
O2 H2 0.8400 . ?
 
loop_
 _geom_angle_atom_site_label_1
 _geom_angle_atom_site_label_2
 _geom_angle_atom_site_label_3
 _geom_angle
 _geom_angle_site_symmetry_1
 _geom_angle_site_symmetry_3
 _geom_angle_publ_flag
C2 C1 Co1 172.26(14) . . ?
C1 C2 C3 174.24(15) . . ?
C4 C3 C8 116.80(14) . . ?
C4 C3 C2 123.48(13) . . ?
C8 C3 C2 119.72(13) . . ?
C5 C4 C3 121.77(13) . . ?
C5 C4 H4 119.1 . . ?
C3 C4 H4 119.1 . . ?
C4 C5 C6 121.47(13) . . ?
C4 C5 H5 119.3 . . ?
C6 C5 H5 119.3 . . ?
N1 C6 C7 121.09(13) . . ?
N1 C6 C5 122.63(13) . . ?
C7 C6 C5 116.27(14) . . ?
C8 C7 C6 121.75(13) . . ?
C8 C7 H7 119.1 . . ?
C6 C7 H7 119.1 . . ?
C7 C8 C3 121.85(13) . . ?
C7 C8 H8 119.1 . . ?
C3 C8 H8 119.1 . . ?
N1 C9 H9A 109.5 . . ?
N1 C9 H9B 109.5 . . ?
H9A C9 H9B 109.5 . . ?
N1 C9 H9C 109.5 . . ?
H9A C9 H9C 109.5 . . ?
H9B C9 H9C 109.5 . . ?
N1 C10 H10A 109.5 . . ?
N1 C10 H10B 109.5 . . ?
H10A C10 H10B 109.5 . . ?
N1 C10 H10C 109.5 . . ?
H10A C10 H10C 109.5 . . ?
H10B C10 H10C 109.5 . . ?
N5 C11 C12 107.45(12) . . ?
N5 C11 H11A 110.2 . . ?
C12 C11 H11A 110.2 . . ?
N5 C11 H11B 110.2 . . ?
C12 C11 H11B 110.2 . . ?
H11A C11 H11B 108.5 . . ?
N2 C12 C11 107.17(12) . . ?
N2 C12 H12A 110.3 . . ?
C11 C12 H12A 110.3 . . ?
N2 C12 H12B 110.3 . . ?
C11 C12 H12B 110.3 . . ?
H12A C12 H12B 108.5 . . ?
N2 C13 C14 112.27(12) . . ?
N2 C13 H13A 109.2 . . ?
C14 C13 H13A 109.2 . . ?
N2 C13 H13B 109.2 . . ?
C14 C13 H13B 109.2 . . ?
H13A C13 H13B 107.9 . . ?
C15 C14 C13 113.66(12) . . ?
C15 C14 H14A 108.8 . . ?
C13 C14 H14A 108.8 . . ?
C15 C14 H14B 108.8 . . ?
C13 C14 H14B 108.8 . . ?
H14A C14 H14B 107.7 . . ?
N3 C15 C14 111.70(12) . . ?
N3 C15 H15A 109.3 . . ?
C14 C15 H15A 109.3 . . ?
N3 C15 H15B 109.3 . . ?
C14 C15 H15B 109.3 . . ?
H15A C15 H15B 107.9 . . ?
N3 C16 C17 107.14(12) . . ?
N3 C16 H16A 110.3 . . ?
C17 C16 H16A 110.3 . . ?
N3 C16 H16B 110.3 . . ?
C17 C16 H16B 110.3 . . ?
H16A C16 H16B 108.5 . . ?
N4 C17 C16 107.08(12) . . ?
N4 C17 H17A 110.3 . . ?
C16 C17 H17A 110.3 . . ?
N4 C17 H17B 110.3 . . ?
C16 C17 H17B 110.3 . . ?
H17A C17 H17B 108.6 . . ?
N4 C18 C19 111.42(12) . . ?
N4 C18 H18A 109.3 . . ?
C19 C18 H18A 109.3 . . ?
N4 C18 H18B 109.3 . . ?
C19 C18 H18B 109.3 . . ?
H18A C18 H18B 108.0 . . ?
C20 C19 C18 113.65(12) . . ?
C20 C19 H19A 108.8 . . ?
C18 C19 H19A 108.8 . . ?
C20 C19 H19B 108.8 . . ?
C18 C19 H19B 108.8 . . ?
H19A C19 H19B 107.7 . . ?
N5 C20 C19 112.04(12) . . ?
N5 C20 H20A 109.2 . . ?
C19 C20 H20A 109.2 . . ?
N5 C20 H20B 109.2 . . ?
C19 C20 H20B 109.2 . . ?
H20A C20 H20B 107.9 . . ?
O1 C21 H21A 109.5 . . ?
O1 C21 H21B 109.5 . . ?
H21A C21 H21B 109.5 . . ?
O1 C21 H21C 109.5 . . ?
H21A C21 H21C 109.5 . . ?
H21B C21 H21C 109.5 . . ?
O1 C21 H21D 109.5 . . ?
H21A C21 H21D 141.1 . . ?
H21B C21 H21D 56.3 . . ?
H21C C21 H21D 56.3 . . ?
O1 C21 H21E 109.5 . . ?
H21A C21 H21E 56.3 . . ?
H21B C21 H21E 141.1 . . ?
H21C C21 H21E 56.3 . . ?
H21D C21 H21E 109.5 . . ?
O1 C21 H21F 109.5 . . ?
H21A C21 H21F 56.3 . . ?
H21B C21 H21F 56.3 . . ?
H21C C21 H21F 141.1 . . ?
H21D C21 H21F 109.5 . . ?
H21E C21 H21F 109.5 . . ?
O2 C22 H22A 109.5 . . ?
O2 C22 H22B 109.5 . . ?
H22A C22 H22B 109.5 . . ?
O2 C22 H22C 109.5 . . ?
H22A C22 H22C 109.5 . . ?
H22B C22 H22C 109.5 . . ?
C6 N1 C9 121.31(12) . . ?
C6 N1 C10 120.19(13) . . ?
C9 N1 C10 116.56(13) . . ?
C13 N2 C12 110.07(12) . . ?
C13 N2 Co1 119.00(9) . . ?
C12 N2 Co1 107.22(9) . . ?
C13 N2 H2N 106.6 . . ?
C12 N2 H2N 106.6 . . ?
Co1 N2 H2N 106.6 . . ?
C15 N3 C16 110.79(11) . . ?
C15 N3 Co1 118.34(9) . . ?
C16 N3 Co1 107.50(8) . . ?
C15 N3 H3N 106.5 . . ?
C16 N3 H3N 106.5 . . ?
Co1 N3 H3N 106.5 . . ?
C18 N4 C17 110.63(12) . . ?
C18 N4 Co1 118.27(9) . . ?
C17 N4 Co1 108.06(8) . . ?
C18 N4 H4N 106.4 . . ?
C17 N4 H4N 106.4 . . ?
Co1 N4 H4N 106.4 . . ?
C20 N5 C11 111.18(11) . . ?
C20 N5 Co1 119.64(9) . . ?
C11 N5 Co1 108.16(8) . . ?
C20 N5 H5N 105.6 . . ?
C11 N5 H5N 105.6 . . ?
Co1 N5 H5N 105.6 . . ?
C1 Co1 N4 92.22(6) . . ?
C1 Co1 N3 89.93(5) . . ?
N4 Co1 N3 86.34(5) . . ?
C1 Co1 N2 87.53(6) . . ?
N4 Co1 N2 179.21(5) . . ?
N3 Co1 N2 94.40(5) . . ?
C1 Co1 N5 91.14(5) . . ?
N4 Co1 N5 93.01(5) . . ?
N3 Co1 N5 178.77(5) . . ?
N2 Co1 N5 86.25(5) . . ?
C1 Co1 Cl2 178.42(4) . . ?
N4 Co1 Cl2 88.85(4) . . ?
N3 Co1 Cl2 91.31(4) . . ?
N2 Co1 Cl2 91.39(4) . . ?
N5 Co1 Cl2 87.63(4) . . ?
C21 O1 H1 109.5 . . ?
C22 O2 H2 109.5 . . ?
 
loop_
 _geom_torsion_atom_site_label_1
 _geom_torsion_atom_site_label_2
 _geom_torsion_atom_site_label_3
 _geom_torsion_atom_site_label_4
 _geom_torsion
 _geom_torsion_site_symmetry_1
 _geom_torsion_site_symmetry_2
 _geom_torsion_site_symmetry_3
 _geom_torsion_site_symmetry_4
 _geom_torsion_publ_flag
C8 C3 C4 C5 2.2(2) . . . . ?
C2 C3 C4 C5 -177.72(14) . . . . ?
C3 C4 C5 C6 0.1(2) . . . . ?
C4 C5 C6 N1 176.08(14) . . . . ?
C4 C5 C6 C7 -2.4(2) . . . . ?
N1 C6 C7 C8 -176.01(14) . . . . ?
C5 C6 C7 C8 2.5(2) . . . . ?
C6 C7 C8 C3 -0.2(2) . . . . ?
C4 C3 C8 C7 -2.1(2) . . . . ?
C2 C3 C8 C7 177.80(14) . . . . ?
N5 C11 C12 N2 -53.47(15) . . . . ?
N2 C13 C14 C15 66.98(17) . . . . ?
C13 C14 C15 N3 -68.81(17) . . . . ?
N3 C16 C17 N4 53.57(15) . . . . ?
N4 C18 C19 C20 -68.11(17) . . . . ?
C18 C19 C20 N5 65.31(17) . . . . ?
C7 C6 N1 C9 -172.03(14) . . . . ?
C5 C6 N1 C9 9.6(2) . . . . ?
C7 C6 N1 C10 -8.4(2) . . . . ?
C5 C6 N1 C10 173.18(14) . . . . ?
C14 C13 N2 C12 -177.74(12) . . . . ?
C14 C13 N2 Co1 -53.49(15) . . . . ?
C11 C12 N2 C13 173.00(12) . . . . ?
C11 C12 N2 Co1 42.19(13) . . . . ?
C14 C15 N3 C16 -178.40(11) . . . . ?
C14 C15 N3 Co1 56.84(15) . . . . ?
C17 C16 N3 C15 -172.19(11) . . . . ?
C17 C16 N3 Co1 -41.49(13) . . . . ?
C19 C18 N4 C17 -175.46(12) . . . . ?
C19 C18 N4 Co1 59.20(15) . . . . ?
C16 C17 N4 C18 -170.28(12) . . . . ?
C16 C17 N4 Co1 -39.37(13) . . . . ?
C19 C20 N5 C11 178.28(11) . . . . ?
C19 C20 N5 Co1 -54.49(15) . . . . ?
C12 C11 N5 C20 171.66(11) . . . . ?
C12 C11 N5 Co1 38.40(13) . . . . ?
 
loop_
 _geom_hbond_atom_site_label_D 
 _geom_hbond_atom_site_label_H 
 _geom_hbond_atom_site_label_A 
 _geom_hbond_distance_DH 
 _geom_hbond_distance_HA 
 _geom_hbond_distance_DA 
 _geom_hbond_angle_DHA 
 _geom_hbond_site_symmetry_A 
C12 H12B O2  0.99 2.63 3.252(2) 120.6 1_655
C13 H13B Cl2  0.99 2.83 3.3472(16) 113.1 .
C13 H13B Cl2  0.99 2.74 3.5305(16) 137.6 3_666
C15 H15A Cl2  0.99 2.76 3.3093(15) 115.5 .
N2 H2N O1  1.00 2.30 3.1310(17) 140.2 1_655
N3 H3N Cl1  1.00 2.42 3.2509(12) 140.5 4_676
N4 H4N Cl1  1.00 2.37 3.2616(13) 148.1 .
O1 H1 Cl1  0.84 2.36 3.1850(11) 168.2 .
O2 H2 Cl1  0.84 2.28 3.1138(14) 169.1 .
 
_refine_diff_density_max    0.459
_refine_diff_density_min   -0.448
_refine_diff_density_rms    0.060

_shelx_res_file
;

    SN221D.res created by SHELXL-2014/7


TITL SN221D in P2(1)/n
CELL 0.71073  10.3649   19.2578   12.8446   90.0000   97.7118   90.0000
ZERR    4.00   0.0002    0.0005    0.0003    0.0000    0.0019    0.0000
LATT  1
SYMM 0.5-X, 0.5+Y, 0.5-Z
SFAC C H N CL CO O
UNIT 88 168 20 8 4 8
LIST 6 ! automatically inserted. Change 6 to 4 for CHECKCIF!!
TEMP -173.15
SIZE 0.35 0.19 0.18
L.S. 4
BOND $H
ACTA
CONF
HTAB
FMAP 2
PLAN 20
EQIV $1 x+1, y, z
HTAB C12 O2_$1
HTAB C13 Cl2
EQIV $2 -x+1, -y+1, -z+1
HTAB C13 Cl2_$2
HTAB C15 Cl2
HTAB N2 O1_$1
EQIV $3 x+1/2, -y+3/2, z+1/2
HTAB N3 Cl1_$3
HTAB N4 Cl1
HTAB O1 Cl1
HTAB O2 Cl1
OMIT 1 2 0
OMIT 1 1 1
OMIT 1 1 0
OMIT 1 0 1

WGHT    0.034100    0.229500
FVAR       0.20776   0.60891
C1    1    0.695098    0.762340    0.511056    11.00000    0.01439    0.01605 =
         0.01291    0.00151    0.00271    0.00227
C2    1    0.782501    0.802601    0.535053    11.00000    0.01931    0.01669 =
         0.01234    0.00148    0.00163    0.00235
C3    1    0.891130    0.849996    0.553457    11.00000    0.01476    0.01311 =
         0.01679    0.00317   -0.00025   -0.00004
C4    1    0.908657    0.896735    0.637268    11.00000    0.01755    0.01687 =
         0.01336    0.00213    0.00176   -0.00021
AFIX  43
H4    2    0.848242    0.896749    0.686728    11.00000   -1.20000
AFIX   0
C5    1    1.011885    0.943137    0.650252    11.00000    0.01845    0.01455 =
         0.01453   -0.00072   -0.00100    0.00026
AFIX  43
H5    2    1.020524    0.974104    0.708343    11.00000   -1.20000
AFIX   0
C6    1    1.104484    0.945382    0.579019    11.00000    0.01473    0.01397 =
         0.01778    0.00262   -0.00116   -0.00072
C7    1    1.088667    0.896199    0.496969    11.00000    0.01557    0.01765 =
         0.01801    0.00094    0.00467   -0.00040
AFIX  43
H7    2    1.150685    0.894615    0.448865    11.00000   -1.20000
AFIX   0
C8    1    0.985785    0.850436    0.484725    11.00000    0.01904    0.01680 =
         0.01694   -0.00203    0.00095   -0.00004
AFIX  43
H8    2    0.978549    0.818232    0.428214    11.00000   -1.20000
AFIX   0
C9    1    1.230200    1.038053    0.676956    11.00000    0.02561    0.02278 =
         0.02613   -0.00328    0.00198   -0.00840
AFIX 137
H9A   2    1.290986    1.074644    0.662353    11.00000   -1.50000
H9B   2    1.268986    1.010633    0.737452    11.00000   -1.50000
H9C   2    1.148937    1.059158    0.692596    11.00000   -1.50000
AFIX   0
C10   1    1.303630    0.988734    0.518683    11.00000    0.01928    0.02553 =
         0.02983    0.00021    0.00577   -0.00607
AFIX 137
H10A  2    1.263204    0.986546    0.445273    11.00000   -1.50000
H10B  2    1.355499    0.946738    0.535976    11.00000   -1.50000
H10C  2    1.360150    1.029644    0.528834    11.00000   -1.50000
AFIX   0
C11   1    0.740184    0.659922    0.320928    11.00000    0.01501    0.02072 =
         0.01865   -0.00161    0.00482    0.00123
AFIX  23
H11A  2    0.811218    0.693355    0.342819    11.00000   -1.20000
H11B  2    0.747149    0.644477    0.248379    11.00000   -1.20000
AFIX   0
C12   1    0.750294    0.598635    0.394244    11.00000    0.01838    0.01810 =
         0.02006   -0.00214    0.00491    0.00197
AFIX  23
H12A  2    0.685952    0.562647    0.367729    11.00000   -1.20000
H12B  2    0.838489    0.578052    0.399978    11.00000   -1.20000
AFIX   0
C13   1    0.715967    0.565297    0.571493    11.00000    0.01844    0.01401 =
         0.02433    0.00346    0.00286    0.00112
AFIX  23
H13A  2    0.800297    0.540402    0.581063    11.00000   -1.20000
H13B  2    0.648283    0.532462    0.539921    11.00000   -1.20000
AFIX   0
C14   1    0.683710    0.588591    0.678191    11.00000    0.02049    0.01945 =
         0.01908    0.00489    0.00075   -0.00076
AFIX  23
H14A  2    0.692728    0.548404    0.726691    11.00000   -1.20000
H14B  2    0.747747    0.624147    0.706955    11.00000   -1.20000
AFIX   0
C15   1    0.547847    0.618373    0.674804    11.00000    0.01993    0.01936 =
         0.01500    0.00280    0.00241   -0.00275
AFIX  23
H15A  2    0.483893    0.585158    0.638806    11.00000   -1.20000
H15B  2    0.527895    0.624685    0.747453    11.00000   -1.20000
AFIX   0
C16   1    0.402681    0.714900    0.619461    11.00000    0.01382    0.02332 =
         0.01581   -0.00082    0.00401    0.00106
AFIX  23
H16A  2    0.389242    0.728255    0.691655    11.00000   -1.20000
H16B  2    0.335994    0.680071    0.593002    11.00000   -1.20000
AFIX   0
C17   1    0.392158    0.777795    0.548840    11.00000    0.01791    0.02118 =
         0.01633   -0.00225    0.00390    0.00318
AFIX  23
H17A  2    0.302110    0.796122    0.539902    11.00000   -1.20000
H17B  2    0.451795    0.814788    0.579593    11.00000   -1.20000
AFIX   0
C18   1    0.442528    0.815857    0.377826    11.00000    0.01817    0.01592 =
         0.02067    0.00133    0.00185    0.00179
AFIX  23
H18A  2    0.515257    0.845236    0.410562    11.00000   -1.20000
H18B  2    0.361905    0.843987    0.371421    11.00000   -1.20000
AFIX   0
C19   1    0.468881    0.793546    0.268789    11.00000    0.02022    0.02195 =
         0.01707    0.00492    0.00171    0.00206
AFIX  23
H19A  2    0.400435    0.760414    0.239531    11.00000   -1.20000
H19B  2    0.462824    0.834777    0.222353    11.00000   -1.20000
AFIX   0
C20   1    0.600999    0.759833    0.267856    11.00000    0.01921    0.01977 =
         0.01601    0.00335    0.00391   -0.00091
AFIX  23
H20A  2    0.615541    0.751659    0.194230    11.00000   -1.20000
H20B  2    0.669658    0.791847    0.300239    11.00000   -1.20000
AFIX   0
C21   1    0.093581    0.593797    0.536695    11.00000    0.02420    0.03470 =
         0.03995    0.00535    0.00410    0.00199
AFIX 127
H21A  2    0.185741    0.603308    0.533007    21.00000   -1.50000
H21B  2    0.059720    0.562245    0.479643    21.00000   -1.50000
H21C  2    0.084416    0.572231    0.604419    21.00000   -1.50000
H21D  2    0.034177    0.555214    0.545039   -21.00000   -1.50000
H21E  2    0.160199    0.596278    0.598403   -21.00000   -1.50000
H21F  2    0.135502    0.586292    0.473627   -21.00000   -1.50000
AFIX   0
C22   1    0.081782    0.551014    0.227046    11.00000    0.03064    0.04317 =
         0.06382   -0.01976    0.00230    0.01008
AFIX 137
H22A  2    0.112479    0.565471    0.161458    11.00000   -1.50000
H22B  2    0.050240    0.503042    0.220181    11.00000   -1.50000
H22C  2    0.153621    0.553972    0.284840    11.00000   -1.50000
AFIX   0
N1    3    1.203298    0.993565    0.586541    11.00000    0.01869    0.01888 =
         0.02545   -0.00426    0.00448   -0.00583
N2    3    0.723817    0.624494    0.498616    11.00000    0.01489    0.01380 =
         0.01682    0.00007    0.00227   -0.00052
AFIX  13
H2N   2    0.801309    0.652605    0.528101    11.00000   -1.20000
AFIX   0
N3    3    0.534909    0.685819    0.619220    11.00000    0.01326    0.01550 =
         0.01528    0.00069    0.00098   -0.00207
AFIX  13
H3N   2    0.596433    0.718543    0.661007    11.00000   -1.20000
AFIX   0
N4    3    0.428271    0.755228    0.445874    11.00000    0.01385    0.01656 =
         0.01327    0.00002    0.00190    0.00027
AFIX  13
H4N   2    0.352794    0.727870    0.410571    11.00000   -1.20000
AFIX   0
N5    3    0.611767    0.693069    0.325526    11.00000    0.01450    0.01518 =
         0.01421   -0.00072    0.00283   -0.00056
AFIX  13
H5N   2    0.546274    0.661565    0.285459    11.00000   -1.20000
AFIX   0
CL1   4    0.132592    0.726722    0.331696    11.00000    0.01888    0.02476 =
         0.01935    0.00284    0.00109    0.00200
CL2   4    0.432120    0.599551    0.423484    11.00000    0.01610    0.01673 =
         0.01748   -0.00123    0.00131   -0.00443
CO1   5    0.575224    0.689788    0.473058    11.00000    0.01185    0.01271 =
         0.01244   -0.00022    0.00154   -0.00152
O1    6    0.022484    0.656900    0.526591    11.00000    0.03172    0.02789 =
         0.02466    0.00151    0.01008    0.00010
AFIX 147
H1    2    0.047566    0.681048    0.478673    11.00000   -1.50000
AFIX   0
O2    6   -0.017435    0.593720    0.247532    11.00000    0.02661    0.03951 =
         0.06494   -0.01612    0.00696    0.00133
AFIX 147
H2    2    0.013699    0.630998    0.273993    11.00000   -1.50000
AFIX   0
HKLF 4

REM  SN221D in P2(1)/n
REM R1 =  0.0313 for    5288 Fo > 4sig(Fo)  and  0.0468 for all    6771 data
REM    296 parameters refined using      0 restraints

END

WGHT      0.0341      0.2295

REM Instructions for potential hydrogen bonds
HTAB C12 O2_$1
HTAB C13 Cl2
HTAB C13 Cl2_$2
HTAB C15 Cl2
HTAB N2 O1_$1
HTAB N3 Cl1_$3
HTAB N4 Cl1
HTAB O1 Cl1
HTAB O2 Cl1

REM Highest difference peak  0.459,  deepest hole -0.448,  1-sigma level  0.060
Q1    1   0.0261  0.5964  0.1918  11.00000  0.05    0.46
Q2    1   0.6036  0.6965  0.3737  11.00000  0.05    0.44
Q3    1   0.4967  0.7391  0.4434  11.00000  0.05    0.39
Q4    1   0.1320  0.6502  0.4423  11.00000  0.05    0.35
Q5    1   0.5947  0.7196  0.3046  11.00000  0.05    0.33
Q6    1   0.4088  0.7480  0.5862  11.00000  0.05    0.31
Q7    1   0.1646  0.5646  0.2663  11.00000  0.05    0.31
Q8    1   0.6140  0.6087  0.6755  11.00000  0.05    0.30
Q9    1   0.9185  0.8614  0.6015  11.00000  0.05    0.30
Q10   1   0.9355  0.8570  0.5160  11.00000  0.05    0.30
Q11   1   0.5559  0.6730  0.5789  11.00000  0.05    0.30
Q12   1   1.0953  0.9270  0.5407  11.00000  0.05    0.29
Q13   1   0.4390  0.7794  0.4131  11.00000  0.05    0.29
Q14   1   0.5599  0.7062  0.6358  11.00000  0.05    0.29
Q15   1   0.4634  0.7993  0.3265  11.00000  0.05    0.28
Q16   1   0.4779  0.7008  0.6127  11.00000  0.05    0.28
Q17   1   0.5237  0.7698  0.2691  11.00000  0.05    0.28
Q18   1   0.7424  0.7856  0.4841  11.00000  0.05    0.27
Q19   1   0.4141  0.7616  0.4945  11.00000  0.05    0.27
Q20   1   0.7393  0.7628  0.5014  11.00000  0.05    0.27
;
_shelx_res_checksum   94194

_shelx_hkl_file
;
   0   0   1    0.70    0.20
   0   0   3    0.30    0.10
   0   0   3    0.60    0.50
   0   0  -3    0.60    0.20
   0   0  -3    0.20    0.20
   0   0   4  407.40   13.30
   0   0   4  419.50   14.00
   0   0  -4  404.10   13.80
   0   0  -4  444.70   14.70
   0   0   5    0.00    0.40
   0   0  -5    0.10    0.10
   0   0  -5    0.60    0.10
   0   0  -5    0.60    0.50
   0   0   6  215.60    7.80
   0   0  -6  216.30    7.40
   0   0  -6  208.80    7.30
   0   0  -6  235.10    8.70
   0   0   7    0.20    0.50
   0   0  -7    0.40    0.20
   0   0  -7    0.50    0.10
   0   0  -7    0.20    0.50
   0   0   8    7.30    0.80
   0   0  -8    7.40    0.30
   0   0  -8    7.20    0.60
   0   0   9   -0.10    0.60
   0   0  10   17.50    1.80
   0   0  11    0.40    0.70
   0   0  12   51.40    2.70
   0   0  13   -2.10    1.20
   0   0  14   58.80    3.60
   0   0  15   -0.80    1.40
   0   0  16    3.00    2.00
   0   1   0   -0.20    0.10
   0  -1   0    0.10    0.10
   0   1   1  117.50    4.10
   0  -1   1  126.30    4.10
   0   1   2  175.50    6.00
   0   1   2  188.70    6.50
   0  -1   2  184.70    6.10
   0  -1   2  185.40    6.30
   0   1   3   13.80    0.50
   0   1  -3   16.30    0.80
   0   1  -3   14.70    0.70
   0  -1   3   15.00    0.70
   0  -1   3   15.30    0.90
   0   1   4   40.40    1.70
   0   1  -4   42.70    1.70
   0   1  -4   39.50    1.80
   0  -1   4   42.10    1.50
   0  -1   4   41.30    1.70
   0   1   5   -0.20    0.40
   0   1  -5    0.50    0.20
   0   1  -5    0.00    0.50
   0  -1   5    0.00    0.20
   0  -1   5   -0.50    0.60
   0   1   6  157.10    5.80
   0   1  -6  147.20    5.50
   0   1  -6  147.60    5.30
   0   1  -6  149.90    6.10
   0  -1   6  158.50    5.60
   0   1   7    7.20    0.70
   0   1  -7    7.10    0.40
   0   1  -7    7.50    0.50
   0   1  -7    8.00    1.10
   0  -1   7    7.70    0.70
   0   1   8   62.20    2.60
   0   1  -8   61.80    2.30
   0   1  -8   61.20    2.30
   0   1  -8   61.90    3.10
   0  -1   8   60.20    2.60
   0   1   9   13.90    1.20
   0   1  -9   13.10    0.60
   0   1  -9   13.00    0.60
   0   1  -9   13.30    1.20
   0   1  -9   12.80    1.20
   0  -1   9   12.20    1.00
   0   1  10    4.20    1.60
   0   1 -10    4.50    0.30
   0   1 -10    4.00    0.20
   0   1 -10    4.60    0.80
   0   1 -10    2.60    0.70
   0  -1  10    3.70    0.80
   0   1  11   20.60    1.40
   0  -1  11   21.30    1.70
   0   1  12   28.30    1.90
   0  -1  12   26.80    2.00
   0   1  13    5.60    1.10
   0  -1  13    9.50    3.80
   0   1  14  116.40    5.40
   0  -1  14  113.60    5.90
   0   1  15    3.20    1.30
   0  -1  15    4.30    1.30
   0   1  16    0.50    1.20
   0  -1  16    0.40    1.20
   0   2   1  232.10    7.80
   0  -2   1  232.90    8.20
   0   2   2  121.50    4.30
   0   2   2  124.10    4.00
   0   2  -2   97.20    4.80
   0  -2   2  124.10    4.20
   0   2   3  137.00    4.80
   0   2   3  139.60    4.70
   0   2   3  147.20    5.40
   0   2  -3  140.40    5.30
   0   2  -3  145.90    5.20
   0  -2   3  141.10    5.00
   0  -2   3  149.70    5.30
   0   2   4  135.50    4.70
   0   2   4  143.70    4.70
   0   2   4  152.90    5.30
   0   2  -4  144.10    5.50
   0   2  -4  147.80    5.30
   0  -2   4  143.10    5.10
   0  -2   4  151.10    5.30
   0   2  -5  165.40    6.10
   0   2  -5  164.10    6.00
   0  -2   5  164.00    5.80
   0  -2   5  167.40    5.80
   0   2   6  335.50   11.70
   0   2  -6  341.70   11.50
   0   2  -6  334.60   11.70
   0   2  -6  320.20   12.00
   0  -2   6  335.50   11.80
   0   2   7   38.00    1.80
   0   2  -7   33.10    1.40
   0   2  -7   32.90    1.50
   0   2  -7   32.90    1.70
   0  -2   7   36.80    1.60
   0   2   8    8.50    1.00
   0   2  -8    9.00    0.50
   0   2  -8    8.90    1.20
   0   2  -8   13.70    1.60
   0  -2   8   10.00    1.00
   0   2   9    3.00    0.70
   0   2  -9    2.50    0.30
   0   2  -9    2.60    0.30
   0   2  -9    2.10    1.40
   0  -2   9    1.90    0.90
   0   2  10   37.70    2.50
   0   2 -10   36.20    1.50
   0   2 -10   36.00    1.70
   0   2 -10   35.70    2.30
   0   2 -10   37.50    2.50
   0  -2  10   33.80    2.40
   0   2  11   12.30    1.10
   0   2 -11   14.90    0.80
   0   2 -11   14.30    0.70
   0   2 -11   14.10    1.40
   0   2 -11   16.00    1.50
   0  -2  11   31.90    9.70
   0   2  12   35.20    2.10
   0  -2  12   35.20    2.20
   0   2  13   10.40    3.90
   0  -2  13   14.20    4.00
   0   2  14  106.40    5.10
   0  -2  14  106.60    5.50
   0   2  15   25.20    2.00
   0  -2  15   23.90    2.20
   0   2  16    4.30    1.30
   0  -2  16    4.50    1.30
   0   3   0   -0.80    0.20
   0  -3   0    0.30    0.20
   0   3   1 1449.80   45.60
   0   3   1 1447.60   46.20
   0  -3   1 1492.10   46.40
   0   3   2  340.60   11.60
   0   3   2  346.80   11.10
   0   3  -2  352.80   12.00
   0  -3   2  348.40   11.60
   0   3   3   27.50    1.30
   0   3   3   27.20    1.10
   0   3  -3   28.10    1.40
   0   3  -3   28.40    1.20
   0  -3   3   32.80    1.40
   0   3   4  287.10    9.90
   0   3   4  285.90    9.40
   0   3   4  307.80   11.40
   0   3  -4  291.10   10.50
   0   3  -4  295.30   10.50
   0  -3   4  292.80   10.00
   0   3   5  244.60    8.40
   0   3   5  248.50    8.10
   0   3   5  259.60    9.40
   0   3  -5  255.20    8.90
   0   3  -5  247.40    8.80
   0  -3   5  256.30    8.80
   0  -3   5  254.80    9.30
   0   3  -6  138.80    4.90
   0   3  -6  144.10    5.50
   0   3  -6  140.40    5.30
   0  -3   6  147.80    5.50
   0   3   7   60.20    2.50
   0   3  -7   58.90    2.20
   0   3  -7   57.90    2.30
   0   3  -7   51.00    2.50
   0  -3   7   54.60    2.50
   0   3   8  216.70    8.00
   0   3  -8  207.40    7.20
   0   3  -8  210.30    7.50
   0   3  -8  201.00    8.00
   0  -3   8  205.90    8.10
   0   3   9    9.10    0.90
   0   3  -9    8.20    0.60
   0   3  -9    8.10    0.50
   0   3  -9    8.10    0.80
   0  -3   9    8.40    1.20
   0   3  10    4.00    1.90
   0   3 -10    3.10    0.40
   0   3 -10    2.20    0.40
   0   3 -10    2.10    0.80
   0   3 -10    1.30    1.80
   0  -3  10    2.00    1.30
   0   3  11   55.10    2.80
   0   3 -11   56.10    2.40
   0   3 -11   56.30    2.50
   0   3 -11   62.00    3.80
   0   3 -11   58.70    3.50
   0  -3  11   91.70   10.20
   0   3  12    0.40    1.30
   0   3 -12    1.80    0.30
   0   3 -12    1.90    0.30
   0   3 -12    2.20    1.80
   0   3 -12    2.30    1.30
   0  -3  12    2.10    1.00
   0   3  13    9.70    1.20
   0  -3  13   22.30    5.00
   0   3  14   20.60    1.90
   0  -3  14   22.30    2.30
   0   3  15   61.70    3.50
   0   3  16   21.70    2.00
   0   4   0   29.60    1.20
   0  -4   0   30.80    1.20
   0   4   1   49.50    2.00
   0   4   1   46.40    1.70
   0   4  -1   47.60    2.30
   0  -4   1   47.90    2.30
   0   4   2  146.90    5.20
   0   4   2  148.40    4.80
   0   4  -2  150.20    5.60
   0  -4   2  148.90    5.10
   0   4   3    4.00    0.30
   0   4   3    3.90    0.40
   0   4  -3    4.00    0.50
   0  -4   3    4.40    0.50
   0   4   4    3.40    0.30
   0   4   4    3.30    0.40
   0   4   4    2.40    0.70
   0   4  -4    3.20    0.40
   0   4  -4    2.40    0.40
   0  -4   4    2.80    0.40
   0   4   5   33.10    1.30
   0   4   5   31.30    1.20
   0   4   5   31.40    2.00
   0   4  -5   34.30    1.60
   0   4  -5   36.80    1.40
   0  -4   5   33.00    1.40
   0   4   6    2.00    0.20
   0   4   6    2.30    0.20
   0   4   6    1.20    0.50
   0   4  -6    1.40    0.40
   0   4  -6    2.10    0.50
   0   4  -6    1.00    0.50
   0   4  -7 1382.40   44.70
   0   4  -7 1384.60   45.80
   0   4  -7 1398.00   46.50
   0   4   8   11.40    1.00
   0   4  -8   10.70    0.70
   0   4  -8   12.80    1.00
   0   4  -8   10.00    0.80
   0   4   9   53.80    2.70
   0   4  -9   53.70    2.30
   0   4  -9   52.10    2.30
   0   4  -9   50.90    2.40
   0   4  10   25.90    2.00
   0   4 -10   22.60    1.10
   0   4 -10   23.20    1.40
   0   4 -10   24.30    1.60
   0   4  11   26.10    2.20
   0   4 -11   26.70    1.90
   0   4 -11   25.00    1.40
   0   4 -11   26.90    3.00
   0   4 -11   26.60    2.60
   0   4  12    2.30    1.00
   0   4 -12    2.30    0.50
   0   4 -12    2.70    0.50
   0   4 -12    1.40    1.80
   0   4 -12    1.40    2.20
   0   4  13  119.70    5.10
   0   4  14   16.60    1.90
   0   4  15    3.20    1.50
   0   4  16   10.50    2.10
   0   5   0    0.40    0.30
   0  -5   0    0.50    0.40
   0   5   1   44.80    1.80
   0   5   1   44.20    1.60
   0   5  -1   45.00    1.80
   0  -5   1   45.20    1.80
   0   5   2    9.60    0.60
   0   5   2    9.20    0.50
   0   5  -2    8.30    0.70
   0  -5   2    9.30    0.60
   0   5   3   25.60    1.10
   0   5   3   25.90    1.10
   0   5  -3   25.20    1.10
   0  -5   3   25.60    1.10
   0   5   4   67.60    2.60
   0   5   4   65.50    2.30
   0   5  -4   66.80    2.70
   0   5  -4   69.70    2.70
   0  -5   4   68.30    2.60
   0   5   5  240.80    8.60
   0   5   5  237.30    8.10
   0   5   5  249.30   10.50
   0   5  -5  238.30    8.70
   0   5  -5  239.00    8.30
   0  -5   5  241.10    8.40
   0   5   6    0.50    0.20
   0   5   6    0.00    0.30
   0   5   6    0.60    0.80
   0   5  -6    0.00    0.40
   0   5  -6   -0.10    0.40
   0   5  -6    0.40    0.60
   0   5   7  445.80   14.90
   0   5   7  456.30   14.80
   0   5   7  465.40   17.00
   0   5  -7  458.10   16.10
   0   5  -7  467.70   17.20
   0   5  -7  419.30   15.10
   0   5  -8   -0.10    0.50
   0   5  -8    0.40    0.50
   0   5  -8    0.20    0.80
   0   5   9   -0.10    0.60
   0   5  -9    0.40    0.50
   0   5  -9    0.90    0.50
   0   5  -9    0.30    0.50
   0   5  10   28.70    1.90
   0   5 -10   27.00    1.30
   0   5 -10   32.20    2.00
   0   5 -10   25.70    1.80
   0   5  11   14.70    1.50
   0   5 -11   13.10    0.90
   0   5 -11   15.30    0.90
   0   5 -11   16.20    2.70
   0   5  12   14.40    1.70
   0   5 -12   14.70    0.90
   0   5 -12   15.60    1.10
   0   5 -12   22.00    3.10
   0   5 -12   11.70    2.50
   0   5  13   60.40    3.20
   0   5  14    2.90    1.70
   0   5  15   28.70    2.40
   0   5  16   52.60    3.40
   0   6   0  166.70    5.70
   0   6   0  159.00    5.60
   0  -6   0  170.60    5.70
   0   6   1    4.20    0.40
   0   6   1    4.40    0.40
   0   6  -1    4.70    0.50
   0  -6   1    4.60    0.50
   0   6   2  293.80    9.80
   0   6   2  292.20   10.10
   0   6  -2  296.30   11.80
   0  -6   2  297.10   10.10
   0   6   3   11.80    0.60
   0   6   3   12.00    0.80
   0   6  -3   11.10    0.70
   0  -6   3   11.80    0.70
   0   6   4  110.40    4.10
   0   6   4  108.00    3.90
   0   6  -4  106.20    4.20
   0  -6   4  107.80    4.00
   0   6   5   21.30    1.00
   0   6   5   21.40    1.00
   0   6   5   20.50    2.00
   0   6  -5   22.10    1.00
   0   6  -5   21.40    1.20
   0   6  -5   23.50    1.40
   0  -6   5   22.30    1.30
   0   6   6   99.90    3.90
   0   6   6   99.60    3.80
   0   6   6  104.20    4.90
   0   6  -6   96.80    3.60
   0   6  -6   97.50    3.80
   0   6  -6   95.10    3.70
   0   6   7  760.60   25.00
   0   6   7  767.60   25.40
   0   6   7  786.60   30.50
   0   6  -7  753.80   25.70
   0   6  -7  752.00   24.60
   0   6  -7  748.00   25.50
   0   6   8   48.70    1.80
   0   6   8   49.30    1.80
   0   6   8   47.50    2.20
   0   6  -8   48.10    2.10
   0   6  -8   48.00    2.20
   0   6  -8   49.30    2.60
   0   6  -9  132.80    4.80
   0   6  -9  141.50    5.60
   0   6  -9  126.20    5.40
   0   6  10   14.90    1.50
   0   6 -10   13.90    1.30
   0   6 -10   15.10    1.00
   0   6 -10   11.50    1.10
   0   6  11   32.40    2.20
   0   6 -11   30.50    1.60
   0   6 -11   32.90    1.70
   0   6  12  111.40    5.40
   0   6 -12  101.20    4.30
   0   6 -12  111.50    4.60
   0   6 -12   99.10    6.90
   0   6 -12  115.60    6.70
   0   6  13  132.70    5.50
   0   6 -13  133.80    5.20
   0   6  14   57.80    3.00
   0   6  15   13.30    1.60
   0   6  16   17.00    2.10
   0   7   0   -0.40    0.60
   0   7   0   -0.30    0.40
   0   7   1  314.20   10.40
   0   7   1  303.70   11.30
   0   7  -1  305.10   10.10
   0   7  -1  300.70   10.10
   0  -7   1  316.50   10.40
   0   7   2   24.50    1.40
   0   7   2   30.50    2.40
   0   7  -2   23.40    1.10
   0  -7   2   25.70    1.30
   0   7   3   10.50    0.70
   0   7   3   10.30    0.60
   0   7  -3   10.40    0.60
   0  -7   3    9.80    1.10
   0   7   4  216.10    7.70
   0   7   4  217.10    7.30
   0   7  -4  225.40    7.80
   0   7  -4  221.10    8.10
   0  -7   4  226.40    7.90
   0   7   5   25.80    1.20
   0   7   5   25.70    1.40
   0   7  -5   26.90    1.50
   0   7  -5   26.00    1.30
   0   7   6   55.60    2.40
   0   7   6   54.00    2.10
   0   7   6   51.40    3.10
   0   7  -6   55.90    2.50
   0   7  -6   52.60    2.40
   0   7  -6   56.20    2.30
   0   7   7    1.70    0.40
   0   7   7    1.90    0.40
   0   7   7    1.60    1.20
   0   7  -7    1.50    0.80
   0   7  -7    2.50    0.70
   0   7  -7    1.30    0.50
   0   7   8  282.40    9.40
   0   7   8  283.20    9.60
   0   7   8  281.30   12.00
   0   7  -8  274.30    9.50
   0   7  -8  270.30   10.00
   0   7  -8  272.90   10.20
   0   7  -9   23.60    1.20
   0   7  -9   24.80    1.50
   0   7  -9   24.90    1.60
   0   7 -10  118.90    4.70
   0   7 -10  131.50    7.40
   0   7  11   29.70    2.10
   0   7 -11   29.30    1.60
   0   7 -11   26.90    1.60
   0   7  12  130.70    6.00
   0   7 -12  125.90    5.20
   0   7 -12  136.40    6.30
   0   7  13    3.20    1.60
   0   7 -13    3.80    1.10
   0   7  14    1.50    1.20
   0   7  15   11.20    2.10
   0   7  16    1.80    1.50
   0   8   0  186.90    6.40
   0   8   0  192.50    7.10
   0   8   1   64.30    2.40
   0   8   1   66.50    2.70
   0   8  -1   63.40    2.50
   0   8  -1   62.80    2.50
   0   8   2   28.70    2.10
   0   8   2   27.70    1.80
   0   8  -2   28.80    1.40
   0   8  -2   26.30    1.30
   0  -8   2   27.10    1.30
   0   8   3  153.00    5.40
   0   8   3  151.10    5.40
   0   8  -3  154.10    5.30
   0   8  -3  152.80    5.70
   0  -8   3  156.30    5.40
   0   8   4    3.00    0.60
   0   8   4    3.00    0.60
   0   8  -4    2.20    0.80
   0   8  -4    2.40    0.80
   0   8   5    4.70    0.60
   0   8   5    5.00    0.40
   0   8  -5    4.40    0.60
   0   8  -5    5.20    0.60
   0   8   6   14.10    0.80
   0   8   6   14.20    0.80
   0   8   6    9.00    1.80
   0   8  -6   13.20    1.00
   0   8  -6   14.20    0.90
   0   8  -6   13.60    1.10
   0   8   7   25.30    1.30
   0   8   7   28.80    1.80
   0   8   7   17.70    2.20
   0   8  -7   25.40    1.30
   0   8  -7   23.30    1.20
   0   8  -7   26.30    2.10
   0   8   8    5.50    0.50
   0   8   8    5.30    0.50
   0   8   8    4.30    1.50
   0   8  -8    6.00    0.80
   0   8  -8    5.40    0.80
   0   8  -8    3.50    0.70
   0   8   9    0.40    0.20
   0   8   9    0.10    0.30
   0   8   9    0.80    1.40
   0   8  -9    0.20    0.50
   0   8  -9    0.50    0.70
   0   8  -9    1.20    0.80
   0   8 -10    9.20    0.90
   0   8 -10   11.00    1.60
   0   8 -11    9.00    1.00
   0   8 -11   11.30    1.40
   0   8  12   89.10    4.60
   0   8 -12   75.90    3.50
   0   8  13   25.40    2.20
   0   8 -13   23.00    1.50
   0   8  14   48.40    2.90
   0   8  15   14.50    2.50
   0   9   0    0.10    0.70
   0   9   0   -0.60    0.40
   0   9   1   -0.50    0.60
   0   9   1    0.50    0.40
   0   9  -1    0.20    0.50
   0   9  -1   -0.10    0.50
   0   9   2   17.70    0.90
   0   9   2   16.10    1.00
   0   9  -2   16.30    1.00
   0   9  -2   18.90    1.50
   0   9   3  349.90   11.70
   0   9   3  345.80   11.50
   0   9  -3  350.70   11.50
   0   9  -3  354.00   14.60
   0   9   4  148.80    5.30
   0   9   4  145.90    4.90
   0   9  -4  145.70    5.70
   0   9  -4  143.80    5.60
   0   9   5   43.30    1.80
   0   9  -5   43.90    1.90
   0   9  -5   43.40    1.90
   0   9   6  113.80    4.10
   0   9   6  111.60    4.10
   0   9   6  107.60    5.90
   0   9  -6  105.00    4.20
   0   9  -6  105.90    4.10
   0   9  -6  107.70    4.60
   0   9   7    0.50    0.40
   0   9   7    0.10    0.40
   0   9   7    0.00    1.70
   0   9  -7    0.50    0.70
   0   9  -7   -0.20    0.70
   0   9  -7    1.40    1.60
   0   9   8   21.40    1.00
   0   9   8   21.20    1.10
   0   9   8   17.50    2.20
   0   9  -8   20.30    1.30
   0   9  -8   22.70    1.70
   0   9  -8   20.90    1.40
   0   9   9   56.00    2.30
   0   9   9   57.80    2.40
   0   9   9   50.00    3.40
   0   9  -9   52.40    2.40
   0   9  -9   57.70    3.20
   0   9  10   43.40    1.60
   0   9  10   44.10    1.70
   0   9  10   35.30    1.90
   0   9  10   36.10    2.20
   0   9 -10   42.30    2.10
   0   9 -10   40.50    2.10
   0   9 -11   48.70    2.60
   0   9 -11   52.60    2.70
   0   9  12   42.50    2.90
   0   9 -12   43.20    2.20
   0   9  13   18.60    1.70
   0   9 -13   17.50    1.30
   0   9  14   40.30    2.80
   0   9  15   -0.60    3.10
   0  10   0  532.40   17.10
   0  10   0  526.00   17.70
   0  10   1    0.00    0.50
   0  10   1   -0.10    0.70
   0  10  -1   -0.10    0.70
   0  10  -1   -0.50    0.50
   0  10   2  136.70    5.60
   0  10   2  134.70    4.60
   0  10  -2  136.50    4.80
   0  10  -2  136.20    6.00
   0  10   3   29.60    1.40
   0  10   3   30.10    1.30
   0  10  -3   28.90    1.60
   0  10  -3   30.20    1.50
   0  10   4    1.30    0.40
   0  10   4   -0.20    0.60
   0  10  -4   -0.70    0.80
   0  10  -4    0.10    0.50
   0  10   5   72.70    2.80
   0  10   5   73.80    2.70
   0  10  -5   71.10    2.80
   0  10  -5   73.70    3.20
   0  10   6    1.20    0.50
   0  10   6    0.60    0.60
   0  10   6    0.50    1.60
   0  10  -6    1.30    0.60
   0  10  -6    1.10    0.60
   0  10   7    5.10    0.60
   0  10   7    6.50    0.80
   0  10   7    4.50    1.80
   0  10  -7    5.10    0.90
   0  10  -7    5.60    1.00
   0  10  -7    6.20    0.90
   0  10   8   12.20    0.90
   0  10   8   12.10    0.80
   0  10   8    9.20    2.70
   0  10  -8   12.30    0.90
   0  10  -8   12.10    1.00
   0  10  -8   11.70    1.30
   0  10   9   19.60    1.00
   0  10   9   21.00    1.20
   0  10   9   12.60    2.00
   0  10  -9   19.80    1.20
   0  10  -9   19.10    1.30
   0  10  10    5.70    0.50
   0  10  10    5.70    0.50
   0  10  10    1.70    1.30
   0  10 -10    6.00    1.10
   0  10 -10    5.20    1.10
   0  10 -11   22.10    1.60
   0  10 -11   25.30    1.90
   0  10 -12    2.20    1.00
   0  10  13    1.30    1.10
   0  10 -13    1.10    1.00
   0  10  14   17.30    1.80
   0  10  15    2.90    2.30
   0  11   0   -0.30    0.60
   0  11   0   -1.00    0.80
   0  11   1  329.10   11.60
   0  11   1  323.90   11.10
   0  11  -1  320.90   10.80
   0  11  -1  314.20   11.20
   0  11   2   21.20    1.70
   0  11   2   16.60    1.20
   0  11  -2   19.70    1.10
   0  11  -2   18.60    1.40
   0  11   3  169.70    6.50
   0  11   3  163.50    5.80
   0  11  -3  170.20    6.20
   0  11  -3  166.20    6.30
   0  11   4   66.80    2.70
   0  11   4   65.50    2.70
   0  11  -4   65.70    2.70
   0  11  -4   66.90    2.90
   0  11   5    5.30    0.90
   0  11   5    4.90    1.80
   0  11  -5    4.20    1.10
   0  11  -5    4.40    1.00
   0  11   6   51.10    2.70
   0  11   6   49.20    2.10
   0  11  -6   52.30    2.30
   0  11  -6   51.60    2.60
   0  11   7   41.00    2.00
   0  11   7   40.60    1.90
   0  11   7   31.70    3.20
   0  11  -7   40.80    2.00
   0  11  -7   41.10    2.20
   0  11  -7   40.50    2.10
   0  11   8    3.70    0.70
   0  11   8    3.60    0.60
   0  11   8    0.70    2.20
   0  11  -8    3.30    0.80
   0  11  -8    4.20    0.80
   0  11   9    0.60    0.40
   0  11   9    0.60    0.50
   0  11   9    0.30    1.90
   0  11  -9    1.20    1.20
   0  11  -9    0.00    0.70
   0  11  10    0.10    0.40
   0  11  10    0.10    1.70
   0  11 -10    0.00    1.10
   0  11 -10    3.20    2.20
   0  11 -11    8.70    1.60
   0  11 -11    6.00    1.10
   0  11 -12    2.30    1.20
   0  11  13    4.90    1.40
   0  11 -13    4.40    1.10
   0  11  15    7.60    2.30
   0  12   0    9.70    1.20
   0  12   0   10.90    0.90
   0  12   1    0.20    0.70
   0  12   1   -0.50    0.60
   0  12  -1   -0.40    0.70
   0  12  -1   -0.30    0.90
   0  12   2   19.30    1.30
   0  12   2   19.40    1.10
   0  12  -2   19.70    1.40
   0  12  -2   20.70    1.30
   0  12   3  110.00    3.90
   0  12   3  105.20    4.00
   0  12  -3  109.50    4.20
   0  12  -3  106.50    4.20
   0  12   4   -0.90    0.70
   0  12   4    0.30    0.50
   0  12  -4   -0.40    0.70
   0  12  -4   -0.30    1.00
   0  12   5  397.40   13.70
   0  12   5  387.90   13.20
   0  12  -5  388.50   13.00
   0  12  -5  388.10   13.80
   0  12   6   43.40    1.90
   0  12   6   40.40    1.90
   0  12  -6   40.60    2.00
   0  12  -6   41.90    2.20
   0  12   7   10.20    1.00
   0  12   7    7.80    0.80
   0  12   7    5.30    3.10
   0  12  -7    8.50    1.20
   0  12  -7    8.10    1.30
   0  12  -7    7.70    0.90
   0  12   8    3.00    0.60
   0  12   8    2.70    0.70
   0  12   8    4.90    2.70
   0  12  -8    3.30    1.10
   0  12  -8    3.50    0.90
   0  12   9   40.40    1.80
   0  12   9   40.40    2.10
   0  12   9   33.00    3.60
   0  12  -9   39.60    2.30
   0  12  -9   38.70    2.40
   0  12  10    0.70    0.60
   0  12  10    1.00    2.40
   0  12 -10    0.10    0.80
   0  12 -10   -1.30    1.20
   0  12 -11   56.10    2.80
   0  12 -12    0.80    0.80
   0  12 -13   21.90    1.80
   0  12  14    2.60    2.20
   0  13   0    0.50    0.80
   0  13   0    9.00    2.90
   0  13   1  197.20    6.90
   0  13   1  205.30    9.30
   0  13  -1  200.10    6.90
   0  13  -1  202.10    7.50
   0  13   2   85.30    3.20
   0  13   2   87.50    3.40
   0  13  -2   86.00    3.40
   0  13  -2   86.20    4.80
   0  13   3  360.70   12.70
   0  13   3  363.10   12.50
   0  13  -3  373.20   12.30
   0  13  -3  376.70   13.40
   0  13   4  166.00    6.00
   0  13   4  169.20    6.60
   0  13  -4  168.70    6.40
   0  13  -4  165.70    6.40
   0  13   5   12.20    1.10
   0  13   5   11.70    1.10
   0  13  -5   12.80    1.10
   0  13  -5   13.70    1.20
   0  13   6    6.20    0.70
   0  13   6    5.80    0.90
   0  13  -6    7.20    1.30
   0  13  -6    6.50    1.00
   0  13   7   -0.30    0.50
   0  13   7    0.00    0.80
   0  13   7    0.10    2.00
   0  13  -7    0.30    0.90
   0  13  -7    0.70    1.10
   0  13   8   16.70    1.30
   0  13   8   18.00    1.40
   0  13   8   13.40    3.50
   0  13  -8   15.80    1.20
   0  13  -8   14.70    1.40
   0  13   9   19.10    1.30
   0  13   9   20.70    1.60
   0  13   9   11.20    3.40
   0  13  -9   19.80    1.40
   0  13  10   12.90    0.90
   0  13  10    2.00    2.80
   0  13 -10   13.60    1.20
   0  13 -11    4.10    1.20
   0  13 -12    9.90    1.30
   0  13 -13    5.20    1.10
   0  13  14    1.20    2.20
   0  14   0  141.70    4.90
   0  14   0  136.70    5.10
   0  14   1   22.90    1.60
   0  14   1   23.40    1.50
   0  14  -1   22.00    1.40
   0  14  -1   23.00    1.90
   0  14   2   39.80    1.90
   0  14   2   37.60    2.00
   0  14  -2   39.90    1.80
   0  14  -2   39.90    2.00
   0  14   3    1.70    1.00
   0  14   3    2.00    1.10
   0  14  -3    0.90    0.80
   0  14  -3    1.10    1.20
   0  14   4    4.20    0.70
   0  14   4    4.10    0.70
   0  14  -4    2.90    0.80
   0  14  -4    5.00    1.20
   0  14   5   84.80    3.40
   0  14   5   85.70    3.20
   0  14  -5   87.60    3.70
   0  14  -5   84.10    4.10
   0  14   6    0.30    0.60
   0  14   6   -0.30    0.80
   0  14  -6   -0.60    0.80
   0  14  -6   -0.90    1.20
   0  14   7   83.10    3.40
   0  14   7   83.70    3.60
   0  14   7   63.20    6.00
   0  14  -7   83.00    3.60
   0  14   8    4.10    0.80
   0  14   8    4.20    1.00
   0  14   8    2.00    2.50
   0  14  -8    5.00    1.40
   0  14   9  134.50    6.00
   0  14   9  100.00    7.30
   0  14  -9  122.60    4.90
   0  14  10    0.60    0.60
   0  14 -10    1.10    1.30
   0  14 -11   93.80    4.50
   0  14 -12   -0.40    1.40
   0  14 -13    5.10    1.30
   0  15   0   -0.60    1.10
   0  15   0    0.10    0.80
   0  15   1   -0.20    0.80
   0  15   1   -1.00    0.80
   0  15  -1   -0.70    0.80
   0  15  -1    0.40    0.80
   0  15   2    4.20    0.80
   0  15   2    4.10    0.80
   0  15  -2    4.00    1.20
   0  15  -2    5.40    1.40
   0  15   3   80.80    3.20
   0  15   3   81.40    3.40
   0  15  -3   77.70    3.60
   0  15  -3   70.80    3.70
   0  15   4  138.30    6.80
   0  15   4  134.00    5.10
   0  15  -4  133.70    4.90
   0  15   5   60.80    2.60
   0  15   5   65.10    3.00
   0  15  -5   62.00    2.70
   0  15   6   86.10    3.40
   0  15   6   84.20    4.00
   0  15  -6   89.00    3.90
   0  15   7   58.50    2.60
   0  15   7   59.10    2.70
   0  15   7   39.10    5.30
   0  15  -7   57.80    2.50
   0  15   8   70.60    3.50
   0  15   8   64.60    2.90
   0  15   8   44.00    5.50
   0  15  -8   66.50    2.90
   0  15   9   31.20    1.80
   0  15   9   20.50    3.30
   0  15  -9   31.10    2.60
   0  15 -10   71.60    3.60
   0  15 -11   13.20    1.50
   0  15 -12   24.80    2.50
   0  15 -13   12.90    1.40
   0  16   0    8.10    1.00
   0  16   0    5.50    1.50
   0  16   1   22.90    1.60
   0  16   1   18.40    1.90
   0  16  -1   22.00    1.80
   0  16   2   89.70    4.70
   0  16   2   93.70    4.10
   0  16  -2   88.90    3.80
   0  16   3    0.30    1.10
   0  16   3    0.80    1.10
   0  16  -3    0.40    0.80
   0  16   4   42.80    2.00
   0  16   4   43.90    2.70
   0  16  -4   41.30    2.40
   0  16   5   20.80    2.40
   0  16   5   18.00    1.90
   0  16  -5   15.20    1.70
   0  16   6   15.70    1.50
   0  16   6   15.40    1.50
   0  16  -6   15.10    1.30
   0  16   7    5.30    1.20
   0  16   7    5.80    1.20
   0  16   7    0.00    4.80
   0  16  -7    6.80    1.40
   0  16   8   34.60    2.20
   0  16   8   34.20    2.20
   0  16   8   19.40    5.80
   0  16  -8   32.10    2.20
   0  16   9   11.20    1.10
   0  16   9   -0.40    3.90
   0  16  -9   12.40    1.30
   0  16 -10    0.30    1.10
   0  16 -11   22.60    2.10
   0  16 -12   22.60    2.30
   0  16 -13   -1.20    1.50
   0  17   0    0.80    2.50
   0  17   1    1.60    0.90
   0  17  -1    0.90    0.90
   0  17   2    4.30    0.90
   0  17  -2    4.50    1.10
   0  17   3    0.10    0.80
   0  17  -3   -0.10    0.90
   0  17   4   20.80    1.50
   0  17  -4   21.00    1.60
   0  17   5   27.30    1.70
   0  17   5   28.40    1.80
   0  17  -5   28.60    1.80
   0  17   6   47.60    2.30
   0  17   6   51.20    2.90
   0  17  -6   47.40    2.80
   0  17   7    7.40    1.10
   0  17   7    8.10    1.40
   0  17   7    4.40    3.80
   0  17  -7    7.40    1.50
   0  17   8   95.80    4.20
   0  17   8   67.10    7.10
   0  17  -8   89.10    4.10
   0  17   9    3.40    1.10
   0  17  -9    5.10    2.20
   0  17 -10  186.40    8.30
   0  17 -11    7.50    5.50
   0  17 -12    4.10    1.30
   0  17 -13    4.80    5.80
   0  18   0   -0.70    0.90
   0  18   1    8.60    1.20
   0  18  -1    7.90    1.20
   0  18   2   51.00    2.70
   0  18  -2   52.30    2.70
   0  18   3   10.90    1.50
   0  18  -3   11.50    1.60
   0  18   4   91.00    3.90
   0  18  -4   99.10    4.30
   0  18   5   -0.40    1.20
   0  18  -5    1.10    1.00
   0  18   6    4.40    1.00
   0  18   6   -4.00    4.60
   0  18  -6    3.70    1.10
   0  18   7  107.00    4.50
   0  18   7   79.60    7.20
   0  18  -7  103.90    4.60
   0  18   8   14.40    1.60
   0  18   8   10.10    5.90
   0  18  -8   13.80    2.00
   0  18   9   61.70    3.20
   0  18  -9   59.60    3.10
   0  18 -10    0.20    1.80
   0  18 -11   46.80    3.40
   0  18 -12   39.60    3.00
   0  19   0    0.00    1.30
   0  19   1   44.60    3.00
   0  19  -1   45.10    3.40
   0  19   2   27.10    1.80
   0  19  -2   26.70    2.30
   0  19   3    9.00    1.30
   0  19  -3    8.00    1.30
   0  19   4   75.40    3.90
   0  19  -4   77.70    3.60
   0  19   5   53.00    2.80
   0  19  -5   54.20    6.80
   0  19   6   23.80    2.00
   0  19   6    5.70    6.90
   0  19  -6   23.70    1.80
   0  19   7   40.40    2.40
   0  19   7   23.50    6.90
   0  19  -7   37.20    2.30
   0  19   8   -0.10    1.00
   0  19   8    0.00    6.20
   0  19  -8    0.20    1.30
   0  19  -9    0.00    2.10
   0  19 -10    6.90    2.10
   0  19 -11    2.60    2.00
   0  19 -12    3.60    2.30
   0  20   0  162.80    7.90
   0  20   1   -0.10    1.10
   0  20  -1   -0.10    1.10
   0  20   2   70.00    4.30
   0  20  -2   63.30    3.20
   0  20   3    2.40    1.50
   0  20  -3    3.30    1.20
   0  20   4   12.90    1.40
   0  20  -4   11.70    1.80
   0  20   5   42.90    2.60
   0  20  -5   44.00    2.50
   0  20   6   42.90    2.60
   0  20   6   23.10    5.80
   0  20  -6   47.80    3.00
   0  20   7   36.30    2.60
   0  20   7   12.20    7.60
   0  20  -7   34.60    2.30
   0  20   8    3.00    3.20
   0  20  -8    1.60    1.90
   0  20  -9   35.60    2.40
   0  20 -10   -1.00    1.40
   0  20 -11   11.20    1.60
   0  20 -12    0.50    1.90
   0  21   0    0.70    1.10
   0  21   1   20.90    2.10
   0  21  -1   21.40    1.80
   0  21   2   13.10    1.80
   0  21  -2   14.50    2.40
   0  21   3   19.60    2.50
   0  21  -3   19.10    2.50
   0  21   4    4.50    1.40
   0  21  -4    3.90    1.70
   0  21   5    0.00    1.60
   0  21  -5   -0.70    1.70
   0  21   6   -0.40    1.00
   0  21   6    2.40    7.30
   0  21  -6   -0.50    1.20
   0  21   7    0.80    1.10
   0  21   7   -0.60    5.70
   0  21  -7   -1.00    2.50
   0  21   8   22.10    1.90
   0  21  -8   29.30    4.20
   0  21  -9    2.10    1.80
   0  21 -10    0.20    2.20
   0  22   0   55.30    4.10
   0  22   1   49.60    3.10
   0  22  -1   52.40    3.50
   0  22   2    1.00    1.40
   0  22  -2    1.20    1.50
   0  22   3   73.50    3.90
   0  22  -3   71.80    3.80
   0  22   4    3.90    1.30
   0  22  -4    6.10    1.50
   0  22   5   14.70    1.60
   0  22  -5   16.70    2.30
   0  22   6    1.50    1.80
   0  22  -6    0.90    1.90
   0  22   7   23.10    2.10
   0  22  -7   22.70    2.20
   0  22  -8    0.60    2.20
   0  22  -9    3.70    2.80
   0  23   0   -1.60    2.00
   0  23   1    0.90    1.30
   0  23  -1    0.90    1.20
   0  23   2   14.70    2.60
   0  23  -2   12.80    1.70
   0  23   3    1.90    2.30
   0  23  -3    4.00    1.90
   0  23   4    7.50    2.20
   0  23  -4    8.20    1.50
   0  23   5    1.50    1.60
   0  23  -5    0.60    1.30
   0  23   6    4.60    1.10
   0  23  -6    5.20    1.80
   0  23   7    5.90    1.90
   0  23  -7    4.40    2.20
   0  24   0  177.80    8.30
   0  24   1   13.50    2.60
   0  24  -1   12.80    1.80
   0  24   2   64.70    3.70
   0  24  -2   70.40    4.60
   0  24   3    3.00    1.40
   0  24  -3    1.40    2.20
   0  24   4    0.80    4.00
   0  24  -4    0.20    2.00
   0  24   5    2.80    2.10
   0  24  -5    4.00    2.20
   0  24   6    5.50    1.90
   0  24   7    4.90    2.10
   0  25   0    0.10    1.70
   0  25   1    9.10    2.40
   0  25  -1    8.80    2.60
   0  25   2   18.40    2.20
   0  25  -2   18.20    2.60
   0  25   3    0.50    1.70
   0  25   4    0.60    1.40
   0  25   5   11.30    1.90
   0  25   6   13.80    2.20
   0  26   2    7.20    2.90
   0  26   3    1.40    5.70
   0  26   4   17.50    2.90
   0  26   5    2.20    2.80
  -1   0  16    0.60    1.70
  -1   0  15   12.60    1.80
  -1   0  14    0.20    1.80
  -1   0  13   76.70    3.70
  -1   0  12   -0.70    1.10
  -1   0  11  197.60    7.70
  -1   0  10   -0.40    0.70
  -1   0   9    1.60    0.80
  -1   0   8    0.10    0.50
   1   0  -7   94.70    3.40
   1   0  -7   90.60    3.30
   1   0  -7  102.40    3.80
  -1   0   7   99.20    3.70
   1   0  -6    0.40    0.10
   1   0  -6    0.70    0.10
   1   0  -6   -0.20    0.50
  -1   0   6   -0.80    0.60
   1   0  -5   52.30    2.00
   1   0  -5   52.70    2.20
   1   0  -5   54.70    2.40
  -1   0   5   60.20    2.40
   1   0  -4    0.20    0.20
   1   0  -4   -0.40    0.50
  -1   0   4    0.10    0.10
  -1   0   4   -0.20    0.40
   1   0  -3    2.00    0.20
   1   0  -3    2.70    0.40
   1   0  -3    1.90    0.50
  -1   0   3    2.20    0.30
  -1   0   3    2.60    0.30
  -1   0   3    1.30    0.50
   1   0  -2    0.40    0.20
   1   0  -2   -0.60    0.20
   1   0  -2    0.30    0.50
  -1   0   2    0.60    0.20
  -1   0   2    0.50    0.20
  -1   0   2    0.60    0.50
   1   0  -1  533.10   17.70
   1   0  -1  528.90   18.80
  -1   0   1  514.10   17.10
   1   0   0    1.40    0.40
   1   0   0    0.40    0.50
  -1   0   0   -0.70    0.50
  -1   0  -1   -0.30    0.10
  -1   0  -1   -0.50    0.50
   1   0   2    0.10    0.20
   1   0   2    0.20    0.20
   1   0   2    0.20    0.70
  -1   0  -2    0.70    0.20
  -1   0  -2    1.00    0.70
   1   0   3   12.70    0.60
   1   0   3   13.10    0.70
   1   0   3   13.20    1.20
  -1   0  -3   12.80    0.70
  -1   0  -3   13.80    1.20
   1   0   4    0.20    0.20
   1   0   4    0.50    0.40
  -1   0  -4    0.20    0.20
  -1   0  -4   -0.40    0.70
   1   0   5    5.20    0.30
   1   0   5    4.70    0.60
  -1   0  -5    5.80    0.40
  -1   0  -5    5.50    1.00
   1   0   6    0.20    0.20
   1   0   6    3.60    2.00
  -1   0  -6    0.00    0.20
  -1   0  -6   -0.20    0.80
   1   0   7   93.00    3.30
   1   0   7   91.80    3.50
  -1   0  -7   90.80    3.40
  -1   0  -7   97.90    4.30
   1   0   8    0.30    0.20
   1   0   8   -0.20    0.50
  -1   0  -8    0.40    0.30
  -1   0  -8    0.30    0.90
   1   0   9   79.40    3.00
   1   0   9   79.80    3.50
  -1   0  -9   81.40    3.20
  -1   0  -9   85.60    4.20
   1   0  10   -0.60    0.60
  -1   0 -10    0.20    0.20
  -1   0 -10    0.20    0.20
  -1   0 -10    0.20    0.70
   1   0  11   31.40    1.80
   1   0  12   -0.10    0.80
   1   0  13   -0.10    0.80
   1   0  14   -0.80    0.90
   1   0  15    4.60    1.20
   1   0  16    1.60    2.70
  -1   1  16    3.50    1.50
  -1  -1  16    3.60    1.40
  -1   1  15   13.10    1.50
  -1  -1  15   14.60    1.50
  -1   1  14   30.50    2.40
  -1  -1  14   30.30    2.30
  -1   1  13    4.80    1.10
  -1  -1  13    5.50    1.20
  -1   1  12    5.80    1.00
  -1  -1  12    5.00    1.40
  -1   1  11   34.00    1.90
  -1  -1  11   33.80    2.00
  -1   1  10   64.30    3.00
  -1  -1  10   63.90    2.80
   1   1  -9  196.40    6.80
   1   1  -9  188.40    6.80
   1   1  -9  206.60    8.10
   1   1  -9  207.80    7.80
  -1   1   9  206.90    7.90
  -1  -1   9  200.80    7.50
   1   1  -8  101.10    3.60
   1   1  -8  100.30    3.70
   1   1  -8  111.20    4.50
  -1   1   8  106.00    4.20
  -1  -1   8  100.70    4.00
   1   1  -7  216.10    7.50
   1   1  -7  218.00    7.80
   1   1  -7  208.60    8.20
   1   1  -7  235.80    8.60
  -1   1   7  222.00    8.10
  -1  -1   7  222.60    8.10
   1   1  -6   52.20    1.90
   1   1  -6   54.60    2.20
   1   1  -6   47.70    2.30
   1   1  -6   53.20    2.40
  -1   1   6   48.10    2.10
  -1  -1   6   49.50    2.10
   1   1  -5 1636.00   52.60
   1   1  -5 1677.90   53.50
   1   1  -5 1581.90   53.80
   1   1  -5 1726.10   56.10
  -1   1   5 1655.50   53.30
  -1  -1   5 1645.00   53.00
   1   1  -4  132.90    4.80
   1   1  -4  132.90    5.20
   1   1  -4  139.90    5.70
  -1   1   4  135.10    4.80
  -1   1   4  137.40    5.00
  -1   1   4  140.10    5.30
  -1  -1   4  136.60    4.90
  -1  -1   4  138.90    4.90
   1  -1  -4  133.80    4.70
   1  -1  -4  140.70    5.30
   1   1  -3  567.90   18.80
   1   1  -3  592.20   20.10
   1   1  -3  630.10   20.70
  -1   1   3  574.20   19.20
  -1   1   3  608.10   22.10
  -1  -1   3  584.70   19.40
  -1  -1   3  600.90   19.70
   1  -1  -3  570.60   19.00
   1  -1  -3  620.10   20.90
   1   1  -2  667.50   22.30
   1   1  -2  734.60   24.30
  -1   1   2  666.50   22.90
  -1   1   2  722.00   26.90
  -1  -1   2  671.20   23.30
  -1  -1   2  704.70   22.90
  -1  -1   2  724.60   25.50
   1  -1  -2  694.30   22.70
   1  -1  -2  738.00   24.40
   1   1  -1  325.40   10.60
   1   1  -1  321.00   12.10
   1  -1  -1  319.40   11.10
   1  -1  -1  328.10   11.90
  -1   1   0   -0.50    0.10
  -1   1   0   -0.70    0.50
  -1  -1   0   -0.20    0.10
  -1  -1   0    0.00    0.40
  -1   1  -1   -0.30    0.20
  -1   1  -1   -1.00    0.60
  -1  -1  -1   -0.50    0.20
  -1  -1  -1   -0.50    0.60
   1   1   2   73.20    2.70
   1   1   2   77.20    3.40
  -1   1  -2   64.40    2.90
  -1   1  -2   74.00    2.80
  -1   1  -2   73.40    3.50
  -1  -1  -2   68.50    2.80
  -1  -1  -2   74.90    3.40
   1  -1   2   72.10    2.80
   1  -1   2   73.30    2.50
   1   1   3   34.20    1.50
   1   1   3   35.90    2.00
  -1   1  -3   33.60    1.60
  -1   1  -3   33.90    1.60
  -1   1  -3   37.30    2.10
  -1  -1  -3   34.00    1.50
  -1  -1  -3   36.80    2.10
   1  -1   3   33.10    1.40
   1  -1   3   35.00    1.40
   1   1   4  190.80    6.70
   1   1   4  197.20    6.90
   1   1   4  204.00    8.30
  -1   1  -4  197.70    7.30
  -1   1  -4  191.90    7.20
  -1   1  -4  212.00    9.10
  -1  -1  -4  191.50    7.00
  -1  -1  -4  207.20    8.60
   1  -1   4  193.20    7.00
   1  -1   4  197.90    6.80
   1   1   5  111.70    4.00
   1   1   5  115.30    4.40
  -1   1  -5  113.90    4.30
  -1   1  -5  122.30    5.30
  -1   1  -5  122.60    5.00
  -1  -1  -5  118.40    4.50
  -1  -1  -5  126.20    5.40
   1  -1   5  114.60    4.10
   1  -1   5  118.20    4.30
   1   1   6    0.30    0.20
   1   1   6    1.00    1.40
  -1   1  -6    0.70    0.20
  -1   1  -6    0.40    0.30
  -1   1  -6    0.20    1.00
  -1  -1  -6    0.70    0.30
  -1  -1  -6    0.10    0.70
   1  -1   6    0.40    0.30
   1  -1   6    0.60    1.40
   1   1   7   21.10    0.80
   1   1   7   19.90    1.10
  -1   1  -7   20.90    1.00
  -1   1  -7   21.00    1.80
  -1  -1  -7   20.80    0.90
  -1  -1  -7   20.30    1.40
   1  -1   7   20.50    0.90
   1  -1   7   19.20    1.20
   1   1   8    0.40    0.20
   1   1   8   -0.50    0.70
  -1   1  -8    0.20    0.30
  -1   1  -8   -0.10    1.10
  -1  -1  -8    0.20    0.20
  -1  -1  -8   -0.30    0.90
   1  -1   8    0.20    0.20
   1  -1   8    0.00    0.50
   1   1   9   13.30    1.30
  -1   1  -9   11.90    0.60
  -1   1  -9   12.30    1.60
  -1  -1  -9   13.50    0.50
  -1  -1  -9   11.80    0.50
  -1  -1  -9   13.80    0.90
   1  -1   9   11.50    0.60
   1  -1   9   15.40    1.30
   1   1  10  115.90    4.50
  -1   1 -10  116.70    4.20
  -1   1 -10  113.80    4.40
  -1   1 -10  121.10    5.40
   1  -1  10  112.70    5.00
   1   1  11   34.40    2.00
  -1   1 -11   35.80    1.40
  -1   1 -11   34.40    1.50
  -1   1 -11   40.10    2.20
   1  -1  11   33.70    1.90
   1   1  12   33.10    2.00
   1  -1  12   32.10    2.00
   1   1  13   14.90    1.50
   1  -1  13   14.30    1.70
   1   1  14    1.10    1.60
   1  -1  14    1.20    1.50
   1   1  15   50.70    3.00
   1  -1  15   44.20    3.30
   1   1  16    7.20    4.00
   1  -1  16    1.80    1.90
  -1   2  16   48.10    3.30
  -1  -2  16   48.00    3.40
  -1   2  15    0.70    1.50
  -1  -2  15    1.80    1.50
  -1   2  14   18.60    2.20
  -1  -2  14   20.10    2.20
  -1   2  13    3.10    1.40
  -1  -2  13    2.70    1.00
  -1   2  12   62.40    3.10
  -1  -2  12   62.20    3.30
   1   2 -11  106.80    3.80
   1   2 -11  108.10    3.90
   1   2 -11  113.10    4.70
   1   2 -11  112.90    4.60
  -1   2  11  105.10    4.60
  -1  -2  11  110.50    4.80
   1   2 -10   84.60    3.20
   1   2 -10   84.60    3.20
   1   2 -10   97.30    4.10
   1   2 -10   87.90    4.10
  -1   2  10   84.80    3.80
  -1  -2  10   79.50    3.70
   1   2  -9   15.90    0.80
   1   2  -9   16.70    0.80
   1   2  -9   14.50    1.70
  -1   2   9   15.50    1.40
  -1  -2   9   14.50    1.30
   1   2  -8  112.30    4.00
   1   2  -8  109.40    4.30
   1   2  -8  103.30    4.70
   1   2  -8  106.20    5.40
  -1   2   8  109.70    4.40
  -1  -2   8  106.00    4.20
   1   2  -7    7.60    0.50
   1   2  -7    7.40    0.50
   1   2  -7    6.30    0.80
   1   2  -7    5.60    1.20
  -1   2   7    6.10    0.90
  -1  -2   7    5.40    0.80
   1   2  -6  808.10   26.80
   1   2  -6  802.40   27.10
   1   2  -6  798.00   26.70
   1   2  -6  846.50   30.10
  -1   2   6  805.50   28.00
  -1  -2   6  815.40   27.00
   1   2  -5   40.70    1.90
   1   2  -5   44.10    2.10
   1   2  -5   47.40    2.00
   1   2  -5   46.10    2.70
  -1  -2   5   47.60    1.80
   1   2  -4  781.30   27.00
   1   2  -4  793.90   26.60
   1   2  -4  845.70   30.00
  -1   2   4  776.30   25.60
  -1   2   4  835.50   27.60
  -1  -2   4  782.40   26.00
  -1  -2   4  802.50   26.40
   1  -2  -4  796.80   25.90
   1   2  -3  193.20    7.50
   1   2  -3  195.50    7.10
   1   2  -3  209.20    7.90
  -1   2   3  191.00    6.80
  -1   2   3  207.10    7.70
  -1  -2   3  198.20    6.70
  -1  -2   3  200.70    7.10
   1  -2  -3  194.80    7.00
   1   2  -2    1.20    0.30
   1   2  -2    1.20    0.30
   1   2  -2    1.50    1.00
  -1   2   2    0.60    0.20
  -1   2   2    0.60    0.60
  -1  -2   2    1.10    0.30
   1  -2  -2    0.90    0.20
   1   2  -1  882.00   28.50
   1   2  -1  912.60   30.40
  -1   2   1  792.40   29.20
   1  -2  -1  899.60   28.40
  -1   2   0   -0.20    0.40
  -1  -2   0   -0.30    0.20
  -1  -2   0   -0.60    0.50
   1   2   1  438.50   14.70
   1   2   1  478.40   16.50
   1  -2   1  441.40   14.80
   1   2   2   93.40    3.40
   1   2   2  101.00    4.40
  -1   2  -2   95.80    3.90
  -1   2  -2   94.80    3.50
  -1  -2  -2   95.00    3.40
  -1  -2  -2  102.60    4.40
   1  -2   2   93.40    3.50
   1   2   3    0.70    0.20
   1   2   3    0.70    0.70
  -1   2  -3    0.80    0.30
  -1   2  -3    0.80    0.20
  -1  -2  -3    0.90    0.30
  -1  -2  -3    0.00    0.70
   1  -2   3    0.40    0.20
   1  -2   3    0.90    0.40
   1   2   4  302.20   10.30
   1   2   4  326.60   12.90
  -1   2  -4  302.80   10.70
  -1   2  -4  302.50   10.80
  -1  -2  -4  297.00   10.40
  -1  -2  -4  331.20   12.60
   1  -2   4  304.20   10.30
   1  -2   4  305.00   10.40
   1   2   5   26.30    1.10
   1   2   5   26.90    1.80
  -1   2  -5   26.30    1.30
  -1   2  -5   32.30    2.10
  -1   2  -5   28.40    2.10
  -1  -2  -5   25.60    1.20
  -1  -2  -5   28.10    1.80
   1  -2   5   27.60    1.20
   1  -2   5   26.60    1.30
   1   2   6  190.30    6.90
   1   2   6  208.20    7.90
   1   2   6  203.50    7.70
  -1   2  -6  191.70    7.30
  -1   2  -6  198.30    7.50
  -1   2  -6  208.10    8.50
  -1  -2  -6  195.30    7.10
  -1  -2  -6  213.60    8.70
   1  -2   6  197.70    7.00
   1  -2   6  212.10    8.10
   1   2   7    0.90    0.20
   1   2   7    1.10    0.60
  -1   2  -7    1.10    0.30
  -1   2  -7    0.90    0.60
  -1   2  -7    1.60    1.30
  -1  -2  -7    1.30    0.20
  -1  -2  -7    0.20    0.70
   1  -2   7    0.90    0.30
   1  -2   7    0.60    0.60
   1   2   8    4.60    0.30
   1   2   8    3.40    0.60
  -1   2  -8    4.80    0.50
  -1   2  -8    5.00    0.90
  -1   2  -8    4.90    1.40
  -1  -2  -8    5.40    0.30
   1  -2   8    4.80    0.40
   1  -2   8    4.40    0.80
   1   2   9   56.40    2.90
  -1   2  -9   53.30    2.30
  -1   2  -9   56.90    3.70
   1  -2   9   55.90    2.20
   1  -2   9   52.20    2.60
   1   2  10    0.40    0.70
  -1   2 -10    1.00    0.50
  -1   2 -10    0.50    0.40
  -1   2 -10   -1.80    1.70
   1  -2  10    0.70    0.90
   1   2  11   20.10    1.60
  -1   2 -11   18.60    0.90
  -1   2 -11   18.50    1.00
  -1   2 -11   17.00    2.00
   1  -2  11   21.00    1.50
   1   2  12   27.60    2.00
  -1   2 -12   26.00    1.10
  -1   2 -12   24.60    1.30
  -1   2 -12   26.70    2.40
  -1   2 -12   28.00    2.10
   1  -2  12   24.60    2.00
   1   2  13   49.80    2.60
   1  -2  13   51.20    3.00
   1   2  14   82.60    3.90
   1  -2  14   80.60    4.60
   1   2  15    3.60    1.40
   1  -2  15    2.80    1.20
   1   2  16   30.90    2.70
  -1   3  16    7.50    2.10
  -1   3  15    0.10    1.60
  -1   3  14   32.10    2.00
  -1  -3  14   31.10    2.00
  -1   3  13   19.30    1.60
  -1  -3  13   18.10    1.80
   1   3 -12   80.90    3.10
   1   3 -12   80.20    3.10
   1   3 -12   86.70    4.20
   1   3 -12   90.00    4.20
  -1   3  12   91.10    4.30
  -1  -3  12   82.90    4.10
   1   3 -11   26.00    1.30
   1   3 -11   26.00    1.30
   1   3 -11   29.70    2.30
   1   3 -11   28.40    2.50
  -1   3  11   24.30    1.60
  -1  -3  11   24.30    1.90
   1   3 -10    9.50    1.20
   1   3 -10    9.20    0.70
   1   3 -10    9.30    1.10
   1   3 -10    9.80    1.90
  -1   3  10   13.20    1.30
  -1  -3  10   10.60    1.00
   1   3  -9  198.40    7.40
   1   3  -9  200.70    7.50
   1   3  -9  200.90    8.20
   1   3  -9  208.30    9.00
  -1   3   9  209.40    7.90
  -1  -3   9  200.90    7.80
   1   3  -8   22.10    1.10
   1   3  -8   21.80    1.00
   1   3  -8   22.90    1.30
   1   3  -8   20.50    2.40
  -1   3   8   27.70    1.70
  -1  -3   8   24.20    1.40
   1   3  -7    0.70    0.60
   1   3  -7    0.00    0.30
   1   3  -7   -0.20    0.60
   1   3  -7    0.40    1.30
  -1   3   7   -0.70    0.80
  -1  -3   7   -0.40    0.60
   1   3  -6    0.80    0.40
   1   3  -6    0.60    0.50
   1   3  -6    0.50    0.60
  -1  -3   6    1.60    0.70
   1   3  -5  180.30    6.20
   1   3  -5  186.00    6.60
   1   3  -5  179.00    6.40
  -1   3   5  174.10    6.10
  -1   3   5  183.80    7.10
  -1  -3   5  182.90    6.80
   1   3  -4    2.90    0.40
   1   3  -4    2.90    0.30
   1   3  -4    2.80    0.40
  -1   3   4    3.00    0.20
  -1   3   4    2.00    0.60
   1  -3  -4    2.60    0.30
   1   3  -3    7.60    0.50
   1   3  -3    7.70    0.60
  -1   3   3    7.20    0.40
  -1  -3   3    7.70    0.50
   1  -3  -3    8.30    0.50
   1   3  -2    0.70    0.30
  -1   3   2    0.60    0.20
  -1  -3   2    0.40    0.20
   1  -3  -2    1.30    0.20
   1   3  -1    2.40    0.30
   1   3  -1    1.90    0.90
  -1   3   1    2.90    0.30
  -1  -3   1    3.10    0.40
   1  -3  -1    2.20    0.30
   1   3   0  444.20   15.80
   1   3   0  454.70   16.90
  -1   3   0  421.00   14.50
   1  -3   0  423.80   14.30
   1   3   1   48.50    1.70
   1   3   1   49.70    2.50
  -1   3  -1   48.00    2.10
  -1  -3  -1   50.60    2.40
  -1  -3  -1   53.70    3.20
   1  -3   1   47.80    1.80
   1   3   2 1388.10   44.10
   1   3   2 1465.30   47.90
  -1   3  -2 1388.10   45.60
  -1  -3  -2 1352.60   45.60
  -1  -3  -2 1445.00   47.60
   1  -3   2 1388.50   44.50
   1   3   3 2574.80   81.50
   1   3   3 2674.70   86.90
  -1   3  -3 2500.30   82.70
  -1   3  -3 2562.30   82.30
  -1  -3  -3 2519.40   83.80
  -1  -3  -3 2701.30   87.60
   1  -3   3 2625.50   81.20
   1   3   4  323.50   11.00
   1   3   4  339.80   14.10
  -1   3  -4  330.90   11.80
  -1   3  -4  335.20   12.50
  -1  -3  -4  319.80   11.50
  -1  -3  -4  351.50   14.20
   1  -3   4  327.30   11.30
   1   3   5  157.50    5.70
   1   3   5  164.50    7.40
  -1   3  -5  159.70    6.00
  -1   3  -5  171.90    6.90
  -1  -3  -5  164.40    6.10
  -1  -3  -5  179.60    7.70
   1  -3   5  162.40    5.80
   1  -3   5  160.40    6.00
   1   3   6  288.50    9.90
   1   3   6  308.60   11.30
  -1   3  -6  301.60   10.90
  -1   3  -6  288.60   10.80
  -1  -3  -6  294.60   10.50
  -1  -3  -6  311.60   12.40
   1  -3   6  301.40   10.20
   1  -3   6  296.00   11.00
   1   3   7    9.30    0.40
   1   3   7   10.10    1.00
   1   3   7    7.60    0.90
  -1   3  -7    9.40    0.60
  -1   3  -7    9.70    0.70
  -1   3  -7   10.90    2.10
  -1  -3  -7    9.80    0.50
   1  -3   7    9.50    0.60
   1  -3   7   10.40    1.00
   1   3   8   74.40    2.80
   1   3   8   81.70    3.70
  -1   3  -8   76.40    3.20
  -1   3  -8   72.00    3.50
  -1   3  -8   89.20    4.50
  -1  -3  -8   75.40    2.70
   1  -3   8   78.60    2.90
   1  -3   8   75.50    3.40
   1   3   9    8.20    1.10
  -1   3  -9    7.80    0.60
  -1   3  -9    6.80    1.10
  -1   3  -9    7.90    2.10
   1  -3   9    8.00    0.60
   1  -3   9    7.80    1.10
   1   3  10   49.40    2.40
  -1   3 -10   47.10    2.10
  -1   3 -10   50.80    2.30
  -1   3 -10   56.80    4.40
   1  -3  10   46.50    2.50
   1   3  11   85.30    3.90
  -1   3 -11   84.20    3.50
  -1   3 -11   87.30    3.50
  -1   3 -11   92.40    4.80
   1  -3  11   78.40    4.10
   1   3  12    9.80    1.10
  -1   3 -12   11.90    0.70
  -1   3 -12   11.70    0.80
  -1   3 -12   14.60    2.40
   1  -3  12   10.70    1.50
   1   3  13    2.60    1.10
   1  -3  13    2.10    1.00
   1   3  14    3.10    1.60
   1   3  15   13.00    1.50
   1   3  16    1.10    1.30
  -1   4  16   11.40    2.10
  -1   4  15    0.20    1.10
  -1   4  14   15.00    1.70
  -1   4  13    0.10    1.40
   1   4 -12   32.50    1.40
   1   4 -12   30.90    1.60
   1   4 -12   32.50    3.10
   1   4 -12   37.50    3.30
  -1   4  12   30.80    2.10
   1   4 -11   87.70    3.90
   1   4 -11   93.60    3.60
   1   4 -11   98.10    5.00
  -1   4  11   90.60    4.50
   1   4 -10   40.70    1.90
   1   4 -10   43.10    1.90
   1   4 -10   39.10    2.40
   1   4 -10   48.00    3.30
  -1   4  10   46.50    2.40
   1   4  -9  101.00    3.90
   1   4  -9  102.00    3.90
   1   4  -9   93.20    4.30
   1   4  -9  103.70    5.40
  -1   4   9   98.70    4.40
   1   4  -8  339.40   11.60
   1   4  -8  351.90   12.00
   1   4  -8  339.20   12.70
   1   4  -8  353.30   15.20
  -1   4   8  345.20   12.60
   1   4  -7   61.90    2.40
   1   4  -7   62.70    2.80
   1   4  -7   62.90    2.60
   1   4  -6  401.80   13.60
   1   4  -6  410.00   13.80
   1   4  -6  407.70   14.40
  -1   4   6  402.10   13.10
  -1   4   6  406.10   13.30
  -1   4   6  420.90   15.30
   1   4  -5   12.70    0.60
   1   4  -5   13.90    0.90
   1   4  -5   13.70    0.90
  -1   4   5   13.10    0.70
  -1   4   5   13.20    0.60
  -1   4   5   12.40    1.20
   1   4  -4  161.00    5.80
   1   4  -4  158.30    5.90
   1   4  -4  165.50    5.80
  -1   4   4  156.90    5.30
   1  -4  -4  159.60    5.80
   1   4  -3  281.10    9.60
  -1   4   3  278.10    9.10
  -1  -4   3  277.80    9.40
   1  -4  -3  273.40    9.40
   1   4  -2   49.20    1.80
  -1   4   2   50.20    1.90
  -1  -4   2   48.80    1.80
   1  -4  -2   49.00    2.00
   1   4  -1   84.20    2.90
  -1   4   1   82.70    3.20
  -1  -4   1   78.70    2.90
   1  -4  -1   81.60    2.90
   1   4   0    5.90    0.40
  -1   4   0    6.20    0.50
  -1  -4   0    5.60    0.40
   1  -4   0    5.80    0.40
   1   4   1  260.40    9.00
   1   4   1  265.10   10.60
  -1   4  -1  259.10    9.00
  -1  -4  -1  267.00   10.20
   1  -4   1  263.40    8.90
   1   4   2    0.50    0.30
   1   4   2    1.00    1.10
  -1   4  -2    0.40    0.40
  -1  -4  -2    0.50    0.30
   1  -4   2    0.50    0.50
   1   4   3  688.50   22.60
   1   4   3  734.30   25.70
  -1   4  -3  691.40   23.30
  -1  -4  -3  674.00   23.80
   1  -4   3  715.00   23.40
   1   4   4    1.20    0.30
   1   4   4    1.60    1.10
  -1   4  -4    1.50    0.40
  -1   4  -4    2.00    0.50
  -1  -4  -4    1.20    0.30
   1  -4   4    1.10    0.30
   1   4   5  191.40    6.90
   1   4   5  204.80    9.30
  -1   4  -5  189.60    7.00
  -1   4  -5  190.60    7.10
  -1  -4  -5  191.70    6.90
   1  -4   5  196.80    7.50
   1   4   6   75.10    2.70
   1   4   6   76.50    3.70
  -1   4  -6   73.40    3.00
  -1   4  -6   74.10    2.90
  -1  -4  -6   73.60    3.00
   1  -4   6   77.40    3.00
   1   4   7    1.80    0.20
   1   4   7    1.80    0.70
  -1   4  -7    2.10    0.50
  -1   4  -7    1.10    0.60
  -1  -4  -7    2.20    0.40
   1  -4   7    1.80    0.50
   1   4   8  261.30    8.80
   1   4   8  266.90    9.10
   1   4   8  277.30   10.00
  -1   4  -8  262.10    9.80
  -1   4  -8  270.70    9.90
  -1   4  -8  283.10   12.80
   1  -4   8  263.60    9.40
   1   4   9   14.20    1.30
  -1   4  -9   14.70    0.90
  -1   4  -9   15.20    1.30
  -1   4  -9   12.60    2.40
   1  -4   9   14.30    0.90
   1   4  10   78.00    3.60
  -1   4 -10   72.00    3.00
  -1   4 -10   68.00    3.10
  -1   4 -10   73.10    3.60
  -1   4 -10   78.60    4.80
   1   4  11   94.10    4.50
  -1   4 -11   93.40    3.70
  -1   4 -11   89.50    4.10
  -1   4 -11  102.20    5.90
   1   4  12  121.30    5.30
  -1   4 -12  129.00    4.80
  -1   4 -12  123.80    5.10
  -1   4 -12  128.70    7.00
   1   4  13   42.30    2.50
   1   4  14   49.90    2.80
   1   4  15    2.60    1.90
   1   4  16   25.60    2.10
  -1   5  16   43.70    2.80
  -1   5  15    7.70    1.50
  -1   5  14   97.50    4.70
   1   5 -13    5.30    0.90
  -1   5  13    4.80    1.10
   1   5 -12  150.20    5.70
   1   5 -12  149.50    5.90
   1   5 -12  150.70    8.50
  -1   5  12  161.40    6.80
   1   5 -11   24.80    1.30
   1   5 -11   25.80    1.30
   1   5 -11   27.60    2.90
  -1   5  11   28.30    2.00
   1   5 -10    5.20    0.70
   1   5 -10    6.90    1.50
   1   5 -10    4.20    1.10
   1   5 -10    4.70    2.50
  -1   5  10    5.50    1.00
   1   5  -9    0.70    0.50
   1   5  -9    2.00    1.10
   1   5  -9    0.90    0.90
   1   5  -9    3.60    2.30
  -1   5   9    1.20    0.70
   1   5  -8   13.50    0.80
   1   5  -8   13.60    0.80
   1   5  -8   10.50    0.90
   1   5  -7  123.90    4.60
   1   5  -7  128.30    4.60
   1   5  -7  123.50    4.60
  -1   5   7  122.60    4.40
  -1   5   7  124.20    4.30
  -1   5   7  126.20    5.00
  -1   5   7  125.70    4.90
   1   5  -6   13.70    0.80
   1   5  -6   12.70    0.70
   1   5  -6   13.80    0.90
  -1   5   6   13.30    0.60
  -1   5   6   13.70    0.70
  -1   5   6   11.70    1.20
   1   5  -5   24.70    1.10
   1   5  -5   24.90    1.20
   1   5  -5   25.90    1.30
  -1   5   5   24.90    1.20
  -1   5   5   25.60    1.10
   1   5  -4   76.90    2.80
   1   5  -4   76.90    3.40
  -1   5   4   76.10    3.00
   1  -5  -4   75.20    2.80
   1   5  -3    5.30    0.60
   1   5  -3    5.80    0.40
  -1   5   3    5.40    0.40
   1  -5  -3    5.80    0.40
   1   5  -2   70.50    2.50
  -1   5   2   69.50    2.60
  -1  -5   2   67.00    2.50
   1  -5  -2   70.80    2.50
   1   5  -1  243.60    8.60
  -1   5   1  245.70    8.20
  -1  -5   1  244.50    8.20
   1  -5  -1  244.40    9.00
   1   5   0   33.10    1.30
  -1   5   0   31.60    1.60
  -1  -5   0   32.70    1.40
   1  -5   0   32.70    1.30
   1   5   1   48.90    1.90
  -1   5  -1   49.30    1.90
  -1  -5  -1   46.90    1.90
   1  -5   1   48.30    2.00
   1   5   2   69.10    2.60
   1   5   2   67.90    3.60
  -1   5  -2   66.10    2.70
  -1  -5  -2   68.10    3.00
   1  -5   2   66.90    2.50
   1   5   3    0.10    0.20
   1   5   3    0.30    0.90
  -1   5  -3    0.00    0.30
  -1  -5  -3   -0.10    0.30
   1  -5   3    0.10    0.30
   1   5   4  216.30    7.50
   1   5   4  221.60    9.50
  -1   5  -4  208.20    7.70
  -1   5  -4  258.60   10.20
  -1  -5  -4  212.40    8.70
   1  -5   4  218.40    7.60
   1   5   5    3.30    0.40
   1   5   5    1.70    1.10
  -1   5  -5    3.00    0.40
  -1   5  -5    3.90    0.60
  -1  -5  -5    3.60    0.40
   1  -5   5    2.90    0.50
   1   5   6  153.50    5.80
   1   5   6  151.20    6.90
  -1   5  -6  151.60    5.90
  -1   5  -6  147.70    5.40
  -1  -5  -6  150.40    5.70
   1  -5   6  151.10    5.50
   1   5   7   40.20    1.80
   1   5   7   40.90    2.30
  -1   5  -7   38.70    1.90
  -1   5  -7   45.40    1.90
   1  -5   7   40.40    1.90
   1   5   8  135.40    4.80
   1   5   8  139.90    4.90
   1   5   8  137.70    5.80
  -1   5  -8  143.60    5.80
  -1   5  -8  127.10    5.80
   1  -5   8  136.80    5.10
   1   5   9   90.60    4.00
  -1   5  -9   88.20    3.80
  -1   5  -9   92.90    3.90
  -1   5  -9  108.50    5.90
   1  -5   9   89.20    3.60
   1   5  10    5.40    0.90
  -1   5 -10    4.90    0.70
  -1   5 -10    4.90    0.60
  -1   5 -10    3.60    1.20
  -1   5 -10    5.00    2.50
   1   5  11    5.90    1.10
  -1   5 -11    5.80    0.70
  -1   5 -11    5.10    0.70
  -1   5 -11    1.40    2.60
   1   5  12   61.20    3.20
  -1   5 -12   56.50    2.60
  -1   5 -12   55.20    2.70
  -1   5 -12   54.10    4.30
   1   5  13   20.50    1.60
   1   5  14   66.10    3.20
   1   5  15    1.00    1.30
   1   5  16    5.10    2.00
  -1   6  16    2.30    1.50
  -1   6  15   55.20    3.50
  -1   6  14    1.60    1.20
   1   6 -13  136.30    5.30
  -1   6  13  141.90    6.20
   1   6 -12    5.20    1.20
   1   6 -12    6.70    0.70
   1   6 -12    7.00    3.00
  -1   6  12    5.30    1.10
   1   6 -11    0.80    0.60
   1   6 -11    2.40    0.70
   1   6 -11    2.90    2.60
  -1   6  11    2.50    1.10
   1   6 -10    5.90    0.90
   1   6 -10    6.60    0.60
   1   6 -10    3.90    1.00
   1   6 -10    6.10    2.70
  -1   6  10    4.80    1.20
   1   6  -9   17.40    0.90
   1   6  -9   17.80    1.10
   1   6  -9   18.50    1.40
   1   6  -8   52.60    2.20
   1   6  -8   51.90    2.10
   1   6  -8   52.50    2.40
  -1   6   8   50.30    1.70
  -1   6   8   51.30    1.80
  -1   6   8   50.10    2.00
  -1   6   8   50.10    2.20
   1   6  -7   10.00    0.70
   1   6  -7    9.00    0.80
   1   6  -7    8.80    0.80
  -1   6   7    9.40    0.50
  -1   6   7    9.50    0.50
  -1   6   7    6.90    1.00
  -1   6   7    6.40    1.20
   1   6  -6    0.70    0.50
   1   6  -6    0.50    0.30
   1   6  -6    0.70    0.40
  -1   6   6    0.40    0.30
  -1   6   6    0.70    0.60
   1   6  -5   29.60    1.30
   1   6  -5   30.60    1.40
   1   6  -5   27.90    1.40
  -1   6   5   30.40    1.30
  -1   6   5   31.40    1.30
   1   6  -4    0.40    0.50
   1   6  -4    0.50    0.50
  -1   6   4    0.50    0.40
   1  -6  -4    0.80    0.30
   1   6  -3  152.90    5.50
   1   6  -3  152.60    5.50
  -1   6   3  147.80    5.30
   1  -6  -3  150.80    5.20
   1   6  -2    9.40    0.70
   1   6  -2    9.90    1.10
  -1   6   2    8.90    0.60
   1  -6  -2    9.30    0.60
   1   6  -1  127.50    4.40
  -1   6   1  126.50    4.50
  -1  -6   1  125.00    4.40
   1  -6  -1  128.60    4.50
   1   6   0    6.10    0.60
  -1   6   0    5.50    0.60
  -1  -6   0    5.70    0.60
   1  -6   0    6.00    0.50
   1   6   1  211.80    7.20
  -1   6  -1  205.50    7.20
  -1  -6  -1  205.70    7.30
   1  -6   1  207.20    7.00
   1   6   2  506.30   17.10
   1   6   2  518.20   19.50
  -1   6  -2  512.30   19.50
  -1  -6  -2  494.30   17.00
   1  -6   2  502.90   16.60
   1   6   3    2.90    0.40
   1   6   3    2.10    1.70
  -1   6  -3    2.40    0.60
  -1  -6  -3    2.40    0.60
   1  -6   3    2.20    0.60
   1   6   4    9.00    0.50
   1   6   4    7.80    1.80
  -1   6  -4    9.60    1.10
  -1  -6  -4    9.60    0.60
   1  -6   4   12.50    1.80
   1   6   5   34.00    1.50
   1   6   5   32.50    2.40
  -1   6  -5   34.30    1.80
  -1   6  -5   32.90    1.50
  -1  -6  -5   32.90    1.60
   1  -6   5   33.50    1.70
   1   6   6  391.80   13.20
   1   6   6  416.40   16.70
  -1   6  -6  377.30   13.60
  -1   6  -6  390.30   13.60
  -1  -6  -6  381.00   13.70
   1  -6   6  381.10   13.00
   1   6   7  674.50   22.60
   1   6   7  674.50   22.00
   1   6   7  679.00   27.30
  -1   6  -7  654.10   22.60
  -1   6  -7  652.50   22.40
   1  -6   7  672.50   22.30
   1   6   8  151.50    5.80
   1   6   8  150.40    5.50
   1   6   8  149.10    8.10
  -1   6  -8  154.00    6.00
  -1   6  -8  151.70    5.80
   1  -6   8  151.40    6.00
   1   6   9    0.60    0.20
   1   6   9    0.30    0.20
   1   6   9    0.10    0.70
  -1   6  -9    1.00    0.70
  -1   6  -9    1.60    0.90
   1  -6   9    0.40    0.70
   1   6  10   87.70    4.60
  -1   6 -10   83.90    3.40
  -1   6 -10   90.30    3.80
  -1   6 -10   78.20    3.90
  -1   6 -10   92.10    6.30
   1   6  11   11.20    1.50
  -1   6 -11   11.70    1.00
  -1   6 -11   11.90    1.00
  -1   6 -11    9.90    3.00
   1   6  12  100.00    4.80
  -1   6 -12  101.70    4.20
  -1   6 -12  101.60    4.70
  -1   6 -12  113.70    6.90
   1   6  13    2.00    1.20
   1   6  14    4.50    1.70
   1   6  15    1.00    1.30
   1   6  16    2.00    2.10
  -1   7  16   17.40    1.80
  -1   7  15    7.10    2.30
  -1   7  14    0.80    1.10
   1   7 -13   62.20    3.20
  -1   7  13   58.70    3.30
   1   7 -12   54.90    2.60
   1   7 -12   53.10    2.40
   1   7 -12   52.00    5.10
  -1   7  12   52.50    3.10
   1   7 -11   46.20    2.20
   1   7 -11   51.20    2.50
   1   7 -11   45.80    4.60
  -1   7  11   50.60    2.90
   1   7 -10   68.70    2.80
   1   7 -10   69.60    3.10
   1   7 -10   79.90    5.50
   1   7  -9    4.00    0.60
   1   7  -9    5.10    0.60
   1   7  -9    4.50    0.80
   1   7  -8    5.70    0.80
   1   7  -8    4.90    0.80
   1   7  -8    6.70    1.00
  -1   7   8    5.60    0.40
  -1   7   8    5.60    0.40
  -1   7   8    3.50    1.00
  -1   7   8    3.60    1.10
   1   7  -7  154.40    5.60
   1   7  -7  151.60    5.40
   1   7  -7  150.20    5.70
  -1   7   7  155.60    5.60
  -1   7   7  156.40    5.70
   1   7  -6   10.70    0.90
   1   7  -6   11.00    0.90
   1   7  -6    9.70    0.80
  -1   7   6   11.00    0.70
  -1   7   6   10.00    0.60
   1   7  -5   32.90    1.60
   1   7  -5   32.70    1.50
  -1   7   5   34.10    1.50
  -1   7   5   33.40    1.60
   1   7  -4  176.70    6.00
   1   7  -4  175.90    6.40
  -1   7   4  175.80    6.10
   1  -7  -4  179.00    6.20
   1   7  -3   11.70    0.80
   1   7  -3   12.90    1.10
  -1   7   3   11.90    0.70
   1  -7  -3   11.90    0.70
   1   7  -2  309.50   10.40
   1   7  -2  309.00   10.70
  -1   7   2  314.10   11.60
   1  -7  -2  310.00   10.20
   1   7  -1  294.10    9.60
   1   7  -1  288.30    9.90
  -1   7   1  303.50   10.60
   1  -7  -1  295.80    9.70
   1   7   0    0.70    0.40
  -1   7   0    0.80    0.60
  -1  -7   0    1.30    0.80
   1  -7   0    1.00    0.40
   1   7   1   24.50    1.20
  -1   7  -1   23.20    1.20
  -1  -7  -1   27.30    2.50
   1  -7   1   25.30    1.10
   1   7   2   80.40    3.10
  -1   7  -2   80.80    3.20
  -1  -7  -2   80.60    3.70
   1  -7   2   78.90    2.90
   1   7   3   35.70    1.80
   1   7   3   33.80    3.10
  -1   7  -3   35.10    1.60
  -1  -7  -3   35.90    1.70
   1  -7   3   36.20    1.70
   1   7   4    3.30    0.50
   1   7   4    3.30    1.90
  -1   7  -4    3.10    0.50
  -1  -7  -4    3.60    0.50
   1  -7   4    3.40    0.50
   1   7   5   47.00    1.90
   1   7   5   46.50    1.80
   1   7   5   48.30    3.10
  -1   7  -5   46.50    2.10
  -1   7  -5   45.20    2.00
   1  -7   5   44.70    2.00
   1   7   6    1.90    0.40
   1   7   6    1.60    0.40
   1   7   6    0.70    1.40
  -1   7  -6    2.00    0.50
  -1   7  -6    1.70    0.80
   1  -7   6    1.60    0.50
   1   7   7  325.90   11.30
   1   7   7  318.20   11.00
   1   7   7  332.40   13.90
  -1   7  -7  309.60   11.30
  -1   7  -7  319.20   11.70
   1  -7   7  321.50   11.50
   1   7   8    3.00    0.40
   1   7   8    2.80    0.40
   1   7   8    1.90    1.40
  -1   7  -8    2.70    0.70
  -1   7  -8    2.60    0.90
   1  -7   8    2.00    0.80
   1   7   9  432.40   14.50
   1   7   9  444.70   14.90
   1   7   9  439.90   18.60
  -1   7  -9  431.60   15.30
  -1   7  -9  427.30   15.60
  -1   7  -9  425.50   16.00
   1  -7   9  435.90   14.90
  -1   7 -10  148.10    6.00
  -1   7 -10  159.50    6.60
   1   7  11   69.00    3.90
  -1   7 -11   65.30    2.90
  -1   7 -11   61.60    3.00
  -1   7 -11   72.70    5.70
   1   7  12    1.80    1.00
  -1   7 -12    2.60    0.80
  -1   7 -12    3.60    2.50
   1   7  13  128.70    6.10
  -1   7 -13  119.70    5.10
   1   7  14    3.50    1.90
   1   7  15   15.10    1.60
  -1   8  15   35.90    3.20
  -1   8  14   14.10    1.80
   1   8 -13  101.30    4.70
  -1   8  13  110.50    5.30
   1   8 -12   37.40    1.90
   1   8 -12   43.90    2.80
   1   8 -12   40.10    5.00
  -1   8  12   39.60    3.00
   1   8 -11   12.60    0.90
   1   8 -11   13.40    1.30
   1   8 -11   15.40    3.90
   1   8 -10   18.70    1.00
   1   8 -10   19.20    2.20
   1   8  -9    2.50    0.70
   1   8  -9    2.10    0.70
   1   8  -9    3.50    1.60
  -1   8   9    3.00    0.30
  -1   8   9    2.80    0.30
  -1   8   9    0.80    0.90
  -1   8   9    1.40    1.00
   1   8  -8   19.30    1.10
   1   8  -8   19.40    1.20
   1   8  -8   19.70    1.20
  -1   8   8   20.30    1.00
  -1   8   8   20.50    1.00
  -1   8   8   14.70    1.90
   1   8  -7    2.70    0.60
   1   8  -7    2.60    0.60
   1   8  -7    3.50    0.60
  -1   8   7    2.70    0.40
  -1   8   7    6.80    1.20
   1   8  -6    0.10    0.50
   1   8  -6    0.50    0.60
   1   8  -6    0.20    0.50
  -1   8   6    0.20    0.40
  -1   8   6    0.20    0.40
   1   8  -5   95.50    3.70
   1   8  -5   94.60    3.50
  -1   8   5   94.60    3.90
  -1   8   5   94.30    3.40
   1   8  -4  461.60   15.30
   1   8  -4  456.70   15.50
  -1   8   4  468.60   15.80
   1  -8  -4  474.40   15.70
   1   8  -3    1.90    0.60
   1   8  -3    2.20    0.70
  -1   8   3    2.50    0.40
   1  -8  -3    2.20    0.40
   1   8  -2    0.70    0.60
   1   8  -2    0.30    0.50
  -1   8   2   -0.50    0.60
   1  -8  -2    0.70    0.50
   1   8  -1  112.50    3.90
   1   8  -1  108.20    3.90
  -1   8   1  111.90    3.90
   1  -8  -1  111.30    4.10
   1   8   0   75.40    2.80
   1   8   0   70.20    2.90
  -1   8   0   73.70    2.90
   1  -8   0   76.70    2.80
   1   8   1  289.30    9.40
   1   8   1  272.70    9.50
  -1   8  -1  283.20   12.00
   1  -8   1  283.00    9.50
   1   8   2    1.60    1.10
   1   8   2    0.00    0.50
  -1   8  -2    0.10    0.40
   1  -8   2   -0.50    0.60
   1   8   3   47.80    1.90
   1   8   3   42.70    3.20
  -1   8  -3   47.80    2.30
   1  -8   3   47.70    2.20
   1   8   4  176.40    6.20
   1   8   4  172.40    6.00
   1   8   4  179.20    9.00
  -1   8  -4  172.80    6.20
   1  -8   4  176.90    6.30
   1   8   5   29.80    1.70
   1   8   5   28.60    1.20
   1   8   5   24.00    2.80
  -1   8  -5   30.30    2.00
   1  -8   5   27.60    1.30
   1   8   6   22.20    1.00
   1   8   6   20.60    1.10
   1   8   6   19.90    2.70
  -1   8  -6   20.60    1.30
  -1   8  -6   20.60    1.20
   1  -8   6   20.30    1.20
   1   8   7  365.30   12.60
   1   8   7  353.10   12.30
   1   8   7  352.10   16.00
  -1   8  -7  360.10   13.10
  -1   8  -7  340.70   12.60
   1  -8   7  365.10   14.00
   1   8   8   42.80    2.00
   1   8   8   42.50    1.80
   1   8   8   38.80    2.80
  -1   8  -8   44.50    2.30
  -1   8  -8   43.10    2.10
   1  -8   8   41.50    2.10
   1   8   9   56.50    2.40
   1   8   9   55.30    2.40
   1   8   9   47.00    3.20
  -1   8  -9   57.50    3.70
  -1   8  -9   55.10    2.70
  -1   8  -9   52.50    2.60
   1   8  10   26.10    1.10
   1   8  10   27.80    1.20
   1   8  10   19.80    1.50
  -1   8 -10   27.00    1.70
  -1   8 -10   25.10    1.80
   1   8  11    4.10    1.00
  -1   8 -11    2.40    0.80
  -1   8 -11    3.20    0.90
   1   8  12    0.20    1.40
  -1   8 -12    0.50    0.80
  -1   8 -12   -1.70    2.90
   1   8  13   12.10    2.00
  -1   8 -13    7.40    1.10
   1   8  14    0.30    1.30
   1   8  15   15.10    2.10
  -1   9  15    2.90    2.20
  -1   9  14   52.10    3.50
   1   9 -13   10.00    1.30
  -1   9  13    9.00    1.40
   1   9 -12    1.90    0.90
   1   9 -12   -2.70    4.50
  -1   9  12    2.50    1.10
   1   9 -11   16.10    1.60
   1   9 -11   18.70    1.60
   1   9 -11   21.60    4.80
   1   9 -10    1.10    0.80
   1   9 -10    1.50    0.60
  -1   9  10    0.90    0.10
  -1   9  10    0.90    0.10
  -1   9  10    0.50    0.50
   1   9  -9    7.10    0.90
   1   9  -9   11.80    1.80
  -1   9   9    7.60    0.60
  -1   9   9    8.40    0.50
  -1   9   9    3.50    1.40
  -1   9   9    3.00    1.30
   1   9  -8   19.00    1.20
   1   9  -8   16.40    1.10
   1   9  -8   21.10    1.50
  -1   9   8   17.80    1.00
  -1   9   8   17.10    0.90
  -1   9   8   16.70    2.40
   1   9  -7  212.10    7.40
   1   9  -7  205.60    7.60
   1   9  -7  203.70    8.20
  -1   9   7  211.20    8.10
  -1   9   7  213.70    7.30
   1   9  -6   -0.30    0.50
   1   9  -6    0.00    0.50
  -1   9   6    0.30    0.40
  -1   9   6    0.00    0.50
   1   9  -5   30.40    1.60
   1   9  -5   29.90    1.90
  -1   9   5   31.70    1.40
  -1   9   5   41.90    2.30
   1   9  -4   90.00    3.30
   1   9  -4   90.70    3.50
  -1   9   4   89.60    3.70
  -1   9   4   87.30    3.20
   1   9  -3   39.20    1.70
   1   9  -3   41.50    2.40
  -1   9   3   37.70    1.60
   1  -9  -3   38.50    1.70
   1   9  -2   95.40    3.30
   1   9  -2   88.10    3.40
  -1   9   2   89.90    3.30
   1  -9  -2   92.30    3.30
   1   9  -1   95.90    3.60
   1   9  -1   96.50    3.80
  -1   9   1   93.40    3.60
   1  -9  -1   98.40    3.50
   1   9   0   16.50    1.30
   1   9   0   17.20    1.10
  -1   9   0   16.60    1.00
   1  -9   0   17.00    1.10
   1   9   1   14.20    1.00
   1   9   1   13.90    0.80
  -1   9  -1   13.70    0.90
   1  -9   1   15.20    1.20
   1   9   2    7.70    0.70
   1   9   2    8.20    0.70
  -1   9  -2    7.10    0.70
   1  -9   2    8.50    0.70
   1   9   3   65.20    2.50
   1   9   3   58.00    2.30
  -1   9  -3   60.40    2.80
   1  -9   3   64.90    2.50
   1   9   4    1.20    0.40
   1   9   4    0.60    0.50
   1   9   4   -1.00    1.80
  -1   9  -4    3.20    1.50
   1  -9   4    1.20    2.00
   1   9   5   15.00    0.90
   1   9   5   14.60    0.90
   1   9   5   13.10    2.40
  -1   9  -5   14.50    1.10
   1  -9   5   13.90    1.00
   1   9   6   99.90    4.50
   1   9   6   97.70    3.60
   1   9   6   87.80    5.60
  -1   9  -6   97.40    4.20
  -1   9  -6   98.60    4.10
   1  -9   6   94.50    3.80
   1   9   7  105.60    4.10
   1   9   7  104.80    3.90
   1   9   7   98.70    6.10
  -1   9  -7  102.80    4.70
  -1   9  -7  110.50    5.20
   1  -9   7  105.70    4.10
   1   9   8    8.90    0.70
   1   9   8    9.60    0.90
   1   9   8    5.80    2.00
  -1   9  -8    8.80    1.10
  -1   9  -8    7.40    1.10
   1  -9   8    7.60    1.00
   1   9   9   95.00    3.90
   1   9   9   95.20    3.60
   1   9   9   86.90    4.90
  -1   9  -9   96.10    3.90
  -1   9  -9   95.30    4.20
  -1   9  -9   87.40    4.00
   1   9  10  105.50    3.70
   1   9  10  107.90    4.10
   1   9  10   97.40    4.90
  -1   9 -10   97.50    4.00
  -1   9 -10   97.40    4.40
  -1   9 -11   41.20    2.10
  -1   9 -11   36.00    2.10
   1   9  12    0.50    1.50
  -1   9 -12    0.00    0.70
  -1   9 -12    2.40    4.30
   1   9  13  136.10    6.70
  -1   9 -13  131.90    5.60
   1   9  14    0.80    1.40
   1   9  15  106.70    5.20
  -1  10  15   17.70    2.40
  -1  10  14    2.30    1.30
   1  10 -13    4.20    1.00
  -1  10  13    4.50    1.40
   1  10 -12   39.10    2.20
   1  10 -12   46.00    5.70
   1  10 -11    7.60    1.10
   1  10 -11    9.50    1.00
   1  10 -11    7.50    3.20
   1  10 -10   -0.10    0.90
   1  10 -10    0.20    0.90
  -1  10  10    0.00    0.30
  -1  10  10    0.40    0.30
  -1  10  10   -0.40    1.40
  -1  10  10    0.20    1.20
   1  10  -9   50.60    2.30
   1  10  -9   55.90    2.70
  -1  10   9   52.70    2.40
  -1  10   9   54.80    2.30
  -1  10   9   44.10    3.50
   1  10  -8   21.60    1.40
   1  10  -8   22.70    1.50
   1  10  -8   20.60    1.80
  -1  10   8   23.20    1.40
  -1  10   8   23.60    1.10
  -1  10   8   19.40    2.50
   1  10  -7    2.40    0.90
   1  10  -7    2.50    0.90
   1  10  -7    4.10    0.90
  -1  10   7    2.80    0.50
  -1  10   7    4.10    0.70
   1  10  -6  221.90    7.90
   1  10  -6  236.70    8.30
  -1  10   6  240.10    9.70
  -1  10   6  234.80    8.10
   1  10  -5   11.30    1.10
   1  10  -5   11.60    0.90
  -1  10   5   13.60    1.10
  -1  10   5   11.50    0.80
   1  10  -4   70.50    2.80
   1  10  -4   70.70    3.20
  -1  10   4   67.90    2.60
  -1  10   4   70.80    2.60
   1  10  -3    3.60    0.70
   1  10  -3    3.60    0.80
  -1  10   3    4.80    0.80
   1 -10  -3    3.60    0.70
   1  10  -2    0.30    0.50
   1  10  -2    2.80    1.90
  -1  10   2   -0.70    0.50
   1 -10  -2    0.00    0.40
   1  10  -1  543.80   17.60
   1  10  -1  537.80   21.10
  -1  10   1  532.20   17.60
   1 -10  -1  541.60   17.60
   1  10   0  140.00    5.10
   1  10   0  135.00    5.00
  -1  10   0  135.70    4.90
   1 -10   0  142.10    4.90
   1  10   1  486.90   19.20
   1  10   1  486.00   19.00
  -1  10  -1  473.00   15.90
   1 -10   1  485.00   15.80
   1  10   2  152.10    5.40
   1  10   2  153.50    5.80
  -1  10  -2  154.70    5.70
   1 -10   2  149.10    5.30
   1  10   3   96.40    3.70
   1  10   3  100.60    3.70
  -1  10  -3  101.20    5.50
   1 -10   3   98.90    3.80
   1  10   4    6.90    0.60
   1  10   4    6.40    0.60
   1  10   4    5.60    2.10
  -1  10  -4    7.10    1.10
   1 -10   4    7.60    0.90
   1  10   5   83.00    3.30
   1  10   5   81.00    2.90
   1  10   5   74.90    4.90
  -1  10  -5   86.10    4.10
   1 -10   5   80.80    3.20
   1  10   6   15.10    1.10
   1  10   6   12.90    1.00
   1  10   6    9.50    2.20
  -1  10  -6   13.40    1.10
   1 -10   6   15.00    1.00
   1  10   7    4.50    0.60
   1  10   7    4.90    0.70
   1  10   7    1.80    1.50
  -1  10  -7    4.40    1.00
  -1  10  -7    4.50    0.80
   1 -10   7    4.20    0.70
   1  10   8  122.80    4.90
   1  10   8  116.70    4.40
   1  10   8  113.10    6.10
  -1  10  -8  111.80    4.70
  -1  10  -8  114.10    5.20
  -1  10  -8  112.50    4.70
   1 -10   8  108.20    4.10
   1  10   9    8.40    0.70
   1  10   9    7.50    0.70
   1  10   9    2.50    1.90
  -1  10  -9    7.60    1.10
  -1  10  -9    7.00    0.90
   1  10  10    5.20    0.50
   1  10  10    4.30    0.50
   1  10  10    1.30    1.70
  -1  10 -10    4.90    1.10
  -1  10 -10    5.10    1.10
  -1  10 -11   33.20    1.60
  -1  10 -11   31.10    2.10
  -1  10 -12    1.50    1.20
   1  10  13    2.40    1.20
  -1  10 -13    0.50    1.20
   1  10  14   82.50    4.50
   1  10  15    6.20    1.80
  -1  11  15    4.70    2.00
  -1  11  14   25.80    2.50
   1  11 -13   -0.50    1.10
  -1  11  13    0.20    1.10
   1  11 -12    1.20    1.10
   1  11 -12   -3.40    5.30
   1  11 -11    3.00    1.60
   1  11 -11    0.70    1.10
   1  11 -10    8.40    0.80
   1  11 -10   13.10    3.30
  -1  11  10    9.10    0.60
  -1  11  10    8.00    0.90
  -1  11  10    3.20    1.90
  -1  11  10    3.70    1.90
   1  11  -9    0.10    1.10
   1  11  -9    1.00    0.90
  -1  11   9    0.20    0.40
  -1  11   9    0.30    0.70
  -1  11   9   -0.10    1.80
   1  11  -8  160.10    6.00
   1  11  -8  176.00    8.00
  -1  11   8  167.60    6.60
  -1  11   8  169.10    6.10
  -1  11   8  140.10    9.20
   1  11  -7   31.70    1.80
   1  11  -7   31.80    1.80
   1  11  -7   32.60    2.20
  -1  11   7   31.50    1.60
  -1  11   7   31.60    1.70
   1  11  -6    0.10    0.70
   1  11  -6    2.50    1.40
  -1  11   6    0.70    0.60
  -1  11   6    1.00    0.70
   1  11  -5   44.30    2.20
   1  11  -5   44.60    2.10
  -1  11   5   42.30    2.00
  -1  11   5   44.50    3.10
   1  11  -4   52.40    2.10
   1  11  -4   51.30    2.60
  -1  11   4   52.70    2.00
  -1  11   4   52.00    2.60
   1  11  -3    7.90    0.80
   1  11  -3    7.90    0.80
  -1  11   3    7.60    0.90
  -1  11   3    7.00    1.00
   1  11  -2    5.50    1.00
   1  11  -2    6.40    0.70
  -1  11   2    5.20    0.70
   1 -11  -2    6.40    0.90
   1  11  -1   -0.90    0.60
   1  11  -1   -0.90    0.80
  -1  11   1   -0.20    0.70
   1 -11  -1   -0.20    0.50
   1  11   0  429.50   16.60
   1  11   0  415.80   14.20
  -1  11   0  418.80   14.10
   1 -11   0  428.90   16.70
   1  11   1    3.20    2.10
   1  11   1    1.50    0.90
  -1  11  -1    0.50    0.60
   1 -11   1    0.80    0.60
   1  11   2  313.00   11.20
   1  11   2  301.50   10.60
  -1  11  -2  306.80   11.00
   1 -11   2  311.10   10.60
   1  11   3   -1.30    0.70
   1  11   3    0.10    0.60
  -1  11  -3    0.10    1.00
   1 -11   3    0.10    0.70
   1  11   4    0.50    0.70
   1  11   4    1.30    0.70
   1  11   4   -0.80    2.60
  -1  11  -4    0.00    1.10
   1 -11   4   -0.20    0.90
   1  11   5    0.40    0.60
   1  11   5    0.70    0.80
   1  11   5   -0.50    1.90
  -1  11  -5   -0.40    0.80
   1 -11   5    0.30    0.60
   1  11   6   78.50    3.10
   1  11   6   80.50    4.70
   1  11   6   79.70    4.90
  -1  11  -6   80.90    4.40
   1 -11   6   76.70    3.20
   1  11   7    9.00    0.80
   1  11   7    7.20    0.80
   1  11   7    5.70    2.80
  -1  11  -7    8.20    0.90
  -1  11  -7    8.70    1.10
  -1  11  -7    7.50    1.50
   1 -11   7    7.50    0.90
   1  11   8   19.50    1.30
   1  11   8   19.10    1.10
   1  11   8   12.80    2.90
  -1  11  -8   18.00    1.20
  -1  11  -8   21.10    1.80
  -1  11  -8   17.60    1.60
   1  11   9    2.10    0.70
   1  11   9    2.00    0.50
   1  11   9   -0.90    2.10
  -1  11  -9    2.70    1.30
  -1  11  -9    1.00    1.10
   1  11  10    0.10    0.50
   1  11  10    2.50    2.10
  -1  11 -10    0.40    1.30
  -1  11 -10   -0.50    0.60
  -1  11 -11   17.40    1.60
  -1  11 -11   17.80    1.70
  -1  11 -12   26.30    2.10
   1  11  13   37.60    2.80
  -1  11 -13   33.60    2.00
   1  11  14    3.80    1.90
  -1  12  14    5.40    1.50
   1  12 -13    1.20    1.20
   1  12 -12    6.40    1.00
   1  12 -12    7.90    4.50
   1  12 -11    0.60    1.00
   1  12 -11    0.00    1.40
   1  12 -10    2.50    0.80
   1  12 -10    4.90    1.50
  -1  12  10    2.70    0.50
  -1  12  10    1.60    1.80
  -1  12  10    0.80    2.00
   1  12  -9    5.90    1.20
   1  12  -9    5.80    1.30
  -1  12   9    7.40    0.70
  -1  12   9    7.10    0.80
  -1  12   9    1.70    2.30
   1  12  -8  129.80    5.10
   1  12  -8  133.20    5.20
  -1  12   8  137.60    5.30
  -1  12   8  137.80    5.10
   1  12  -7   -0.30    0.80
   1  12  -7    0.20    0.80
  -1  12   7    0.30    0.50
  -1  12   7    0.30    0.60
   1  12  -6  534.20   17.50
   1  12  -6  544.60   20.70
  -1  12   6  521.50   18.00
  -1  12   6  544.50   18.40
   1  12  -5   45.40    2.10
   1  12  -5   43.60    2.10
  -1  12   5   45.20    2.10
  -1  12   5   44.10    1.90
   1  12  -4  159.80    5.90
   1  12  -4  156.40    6.00
  -1  12   4  154.30    5.40
  -1  12   4  155.90    6.30
   1  12  -3    0.20    0.90
   1  12  -3   -0.10    0.60
  -1  12   3   -0.10    0.60
  -1  12   3   -0.10    0.50
   1  12  -2  151.60    5.90
   1  12  -2  150.90    5.50
  -1  12   2  149.70    5.20
  -1  12   2  145.70    5.30
   1 -12  -2  148.20    5.20
   1  12  -1   11.40    1.00
   1  12  -1   12.70    1.40
  -1  12   1   11.10    1.30
   1 -12  -1   11.40    1.00
   1  12   0  151.90    5.40
   1  12   0  146.50    5.30
  -1  12   0  148.50    5.40
   1 -12   0  154.70    6.20
   1  12   1    0.40    1.00
   1  12   1    2.40    1.00
  -1  12  -1    0.10    0.90
   1 -12   1    2.10    0.70
   1  12   2   87.50    3.40
   1  12   2   83.70    3.20
  -1  12  -2   87.60    3.80
   1 -12   2   89.60    4.10
   1  12   3   27.90    1.70
   1  12   3   27.50    1.40
  -1  12  -3   26.50    2.20
   1 -12   3   27.40    2.00
   1  12   4   19.50    1.10
   1  12   4   20.30    1.40
   1  12   4   14.50    2.90
  -1  12  -4   19.20    1.40
   1 -12   4   22.80    1.80
   1  12   5   16.10    1.30
   1  12   5   14.50    1.10
   1  12   5   12.10    3.60
  -1  12  -5   16.40    1.50
   1 -12   5   15.20    1.10
   1  12   6    1.60    0.50
   1  12   6    0.60    0.70
   1  12   6    1.10    2.00
  -1  12  -6    1.70    0.70
  -1  12  -6    1.20    0.90
   1 -12   6    1.40    0.90
   1  12   7   20.70    1.30
   1  12   7   21.90    1.20
   1  12   7   10.80    3.40
  -1  12  -7   22.10    2.40
  -1  12  -7   23.40    1.80
  -1  12  -7   20.20    1.50
   1  12   8    7.90    0.80
   1  12   8    9.40    0.80
   1  12   8    6.20    2.50
  -1  12  -8    8.60    1.50
  -1  12  -8    8.90    1.00
   1  12   9    4.60    0.70
   1  12   9    3.90    0.80
   1  12   9    1.80    2.60
  -1  12  -9    4.00    1.00
  -1  12  -9    4.00    1.20
   1  12  10   29.20    1.60
   1  12  10   19.80    3.20
  -1  12 -10   30.80    1.60
  -1  12 -10   29.00    2.80
  -1  12 -11    5.50    1.30
  -1  12 -12   -0.20    1.10
  -1  12 -13   14.20    1.70
   1  12  14  150.90    7.20
  -1  13  14   93.20    4.40
   1  13 -13   13.10    1.60
   1  13 -12    4.50    2.00
   1  13 -12   11.50    4.70
   1  13 -11    0.10    0.80
   1  13 -10   22.70    1.50
  -1  13  10   25.10    1.50
  -1  13  10   12.70    2.90
   1  13  -9    0.90    1.20
  -1  13   9    0.70    0.60
  -1  13   9    1.10    0.90
  -1  13   9    0.70    2.40
   1  13  -8   54.20    2.40
   1  13  -8   49.20    2.70
  -1  13   8   56.90    2.90
  -1  13   8   55.40    2.70
   1  13  -7   41.40    2.10
   1  13  -7   48.70    3.20
  -1  13   7   43.70    2.00
  -1  13   7   44.60    2.10
   1  13  -6   33.50    2.30
   1  13  -6   32.20    2.00
  -1  13   6   33.00    2.00
  -1  13   6   33.60    1.70
   1  13  -5   39.10    2.00
   1  13  -5   36.50    2.00
  -1  13   5   38.30    1.90
  -1  13   5   39.60    2.30
   1  13  -4   25.60    1.40
   1  13  -4   25.50    1.60
  -1  13   4   26.30    1.90
  -1  13   4   24.10    1.50
   1  13  -3    4.40    1.10
   1  13  -3   11.00    2.70
  -1  13   3    4.60    0.70
  -1  13   3    4.00    0.80
   1  13  -2   12.80    1.20
   1  13  -2   12.20    1.30
  -1  13   2   11.40    1.00
  -1  13   2   12.00    1.30
   1  13  -1    0.20    0.70
   1  13  -1   -0.20    1.00
  -1  13   1    0.00    0.70
  -1  13   1   -0.30    1.00
   1 -13  -1    0.10    0.70
   1  13   0  563.40   18.50
   1  13   0  552.00   18.80
  -1  13   0  563.40   18.80
   1 -13   0  565.00   20.50
   1  13   1   52.50    2.30
   1  13   1   51.00    3.40
  -1  13  -1   53.20    3.20
   1 -13   1   51.00    2.20
   1  13   2  264.80    9.10
   1  13   2  260.60    9.00
  -1  13  -2  258.30    9.30
   1 -13   2  265.10    9.30
   1  13   3  269.60    9.30
   1  13   3  251.60    9.00
  -1  13  -3  281.20   11.50
   1 -13   3  262.00    9.30
   1  13   4   70.50    2.80
   1  13   4   68.10    2.80
   1  13   4   55.20    4.60
  -1  13  -4   76.90    3.30
   1 -13   4   72.60    3.40
   1  13   5   14.30    1.00
   1  13   5   15.30    1.20
   1  13   5    6.80    3.10
  -1  13  -5   15.50    1.20
  -1  13  -5   14.70    1.40
   1 -13   5   15.10    1.30
   1  13   6  189.50    8.60
   1  13   6  190.80    7.50
   1  13   6  167.10   10.60
  -1  13  -6  188.30    7.50
  -1  13  -6  190.00    8.00
   1  13   7    0.10    0.60
   1  13   7    0.50    0.50
   1  13   7    5.20    3.40
  -1  13  -7   -0.50    1.10
  -1  13  -7    0.40    1.10
   1  13   8   29.90    1.50
   1  13   8   29.80    1.40
   1  13   8   22.90    3.90
  -1  13  -8   28.50    1.90
  -1  13  -8   27.50    2.10
   1  13   9    2.10    0.70
   1  13   9    2.80    0.80
   1  13   9    1.30    2.60
  -1  13  -9    3.50    1.50
   1  13  10    0.50    0.50
   1  13  10   -0.70    2.50
  -1  13 -10   -0.70    1.10
  -1  13 -11    0.00    0.80
  -1  13 -12   11.10    2.70
  -1  13 -13    4.30    1.60
   1  13  14    3.60    2.30
   1  14 -13    7.00    1.50
   1  14 -12   49.90    2.90
   1  14 -12   38.70    7.50
   1  14 -11    1.10    0.90
   1  14 -10    5.70    1.00
  -1  14  10    3.30    0.60
   1  14  -9   15.90    1.30
  -1  14   9   15.90    1.10
  -1  14   9    9.00    3.30
   1  14  -8   72.40    3.00
  -1  14   8   76.40    3.80
  -1  14   8   69.00    3.00
   1  14  -7   39.70    2.30
  -1  14   7   44.00    2.50
  -1  14   7   42.30    1.90
   1  14  -6   91.70    3.60
   1  14  -6   85.60    4.30
  -1  14   6   90.40    3.60
  -1  14   6   92.80    3.90
   1  14  -5    1.40    1.30
   1  14  -5    2.70    1.50
  -1  14   5    1.50    0.70
  -1  14   5    0.80    0.60
   1  14  -4    0.30    0.80
   1  14  -4    1.50    1.10
  -1  14   4    0.30    0.90
  -1  14   4    0.30    0.60
   1  14  -3   44.30    2.10
   1  14  -3   47.70    2.70
  -1  14   3   45.00    2.10
  -1  14   3   47.40    2.30
   1  14  -2   23.70    1.40
   1  14  -2   23.90    1.50
  -1  14   2   24.10    1.30
  -1  14   2   24.00    1.50
   1  14  -1  149.80    5.90
   1  14  -1  142.40    5.30
  -1  14   1  142.30    5.10
  -1  14   1  144.10    5.40
   1  14   0  106.30    4.20
   1  14   0  103.00    3.90
  -1  14   0  107.50    5.30
  -1  14   0  109.20    4.30
   1  14   1  213.70    7.60
   1  14   1  204.50    7.40
  -1  14  -1  214.10    7.50
  -1  14  -1  221.50    7.90
   1 -14   1  211.70    7.60
   1  14   2   29.30    1.60
   1  14   2   31.80    1.60
  -1  14  -2   30.80    1.70
  -1  14  -2   30.80    1.70
   1 -14   2   33.20    1.70
   1  14   3    1.30    1.00
   1  14   3    0.90    0.70
  -1  14  -3    0.70    0.70
  -1  14  -3    1.20    0.90
   1 -14   3    1.50    0.80
   1  14   4   37.30    1.80
   1  14   4   36.30    1.90
   1  14   4   30.60    4.10
  -1  14  -4   38.70    2.00
  -1  14  -4   42.00    3.20
   1 -14   4   38.00    2.00
   1  14   5    0.30    0.60
   1  14   5    0.10    0.80
   1  14   5   -2.20    2.90
  -1  14  -5   -0.20    1.20
  -1  14  -5   -0.20    1.40
   1  14   6    0.10    0.60
   1  14   6   -0.40    0.90
   1  14   6    0.40    2.40
  -1  14  -6   -0.50    1.10
   1  14   7    7.50    1.60
   1  14   7    6.70    0.90
   1  14   7    8.40    4.00
  -1  14  -7    7.60    1.00
   1  14   8   46.20    2.10
   1  14   8   48.80    2.40
   1  14   8   34.80    3.80
  -1  14  -8   47.30    2.20
   1  14   9    5.50    0.90
   1  14   9   -1.50    3.40
  -1  14  -9    3.50    1.00
   1  14  10   18.40    1.30
  -1  14 -10   18.70    1.40
  -1  14 -11    3.40    2.00
  -1  14 -12    0.90    1.00
  -1  14 -13    6.90    1.60
   1  15 -13   12.00    1.50
   1  15 -12    5.40    1.70
   1  15 -12   10.10    7.50
   1  15 -11   10.60    1.80
   1  15 -10    5.10    1.10
  -1  15  10    5.70    0.90
   1  15  -9   59.80    2.80
  -1  15   9   61.30    2.90
  -1  15   9   40.20    4.50
   1  15  -8    7.60    1.10
  -1  15   8    8.10    1.00
  -1  15   8    7.00    0.90
   1  15  -7  119.70    5.00
  -1  15   7  116.70    4.80
  -1  15   7  126.20    4.80
   1  15  -6   13.30    1.30
  -1  15   6   15.20    1.50
  -1  15   6   14.30    1.50
   1  15  -5   65.00    2.90
  -1  15   5   67.60    3.20
  -1  15   5   65.00    3.00
   1  15  -4   80.00    3.60
  -1  15   4   74.20    3.00
  -1  15   4   80.10    3.20
   1  15  -3   71.00    3.20
   1  15  -3   70.50    3.60
  -1  15   3   74.50    3.10
  -1  15   3   74.10    3.30
   1  15  -2   -1.70    1.20
   1  15  -2    0.00    1.30
  -1  15   2   -0.80    1.00
  -1  15   2   -0.30    0.70
   1  15  -1  164.90    5.90
   1  15  -1  154.20    6.20
  -1  15   1  164.80    5.70
  -1  15   1  164.30    6.10
   1  15   0   77.20    4.20
   1  15   0   70.90    3.20
  -1  15   0   72.50    3.00
  -1  15   0   72.00    3.30
   1  15   1   11.60    1.10
   1  15   1   10.20    1.10
  -1  15  -1   11.60    1.10
  -1  15  -1    9.30    1.20
   1  15   2   22.20    1.40
   1  15   2   24.20    1.40
  -1  15  -2   23.20    1.60
  -1  15  -2   19.90    2.00
   1  15   3    5.00    1.00
   1  15   3    4.30    0.90
  -1  15  -3    3.70    0.80
  -1  15  -3    3.80    1.00
   1  15   4    7.00    1.00
   1  15   4    7.40    1.20
   1  15   4    6.10    3.20
  -1  15  -4    8.00    1.10
   1  15   5   10.00    1.40
   1  15   5   10.40    1.30
   1  15   5   -1.80    3.40
  -1  15  -5   11.80    1.50
   1  15   6  134.60    5.40
   1  15   6  144.10    5.50
   1  15   6  121.80    8.90
  -1  15  -6  139.60    5.10
   1  15   7   10.10    1.70
   1  15   7    9.10    1.10
   1  15   7    2.90    4.20
  -1  15  -7   12.20    2.80
   1  15   8   37.50    1.90
   1  15   8   38.60    2.10
   1  15   8   31.30    5.30
  -1  15  -8   36.80    2.50
   1  15   9   31.50    1.70
   1  15   9   21.80    4.40
  -1  15  -9   31.80    2.50
  -1  15 -10   25.30    2.00
  -1  15 -11    7.30    1.40
  -1  15 -12    1.80    1.80
  -1  15 -13   15.60    1.50
   1  16 -13   84.50    4.00
   1  16 -12   34.20    2.90
   1  16 -11    1.10    1.50
   1  16 -10    1.00    1.40
   1  16  -9   -0.10    1.40
  -1  16   9    0.00    0.80
  -1  16   9   -2.10    2.60
   1  16  -8   35.40    2.30
  -1  16   8   34.40    2.00
  -1  16   8   35.40    1.90
   1  16  -7   20.90    1.60
  -1  16   7   19.60    1.40
  -1  16   7   22.00    1.40
   1  16  -6    4.10    1.50
  -1  16   6    3.30    0.80
  -1  16   6    2.70    1.20
   1  16  -5  119.20    4.70
  -1  16   5  116.40    5.20
  -1  16   5  127.50    5.50
   1  16  -4   13.70    1.20
  -1  16   4   14.20    1.30
  -1  16   4   13.60    1.50
   1  16  -3   25.40    1.50
  -1  16   3   28.20    2.10
  -1  16   3   27.10    1.60
   1  16  -2    0.50    0.80
  -1  16   2    0.60    1.10
  -1  16   2    0.10    1.20
   1  16  -1   98.30    4.00
  -1  16   1  101.70    4.00
  -1  16   1   99.70    4.40
   1  16   0   44.20    2.10
   1  16   0   40.50    2.70
  -1  16   0   41.90    2.10
   1  16   1  210.60    8.50
   1  16   1  199.10    8.20
  -1  16  -1  204.50    7.10
   1  16   2   18.70    1.80
   1  16   2   14.40    1.30
  -1  16  -2   17.00    1.30
   1  16   3   79.60    3.30
   1  16   3   79.60    3.50
  -1  16  -3   80.80    3.30
   1  16   4   12.90    1.20
   1  16   4   13.30    1.60
   1  16   4   10.20    4.30
  -1  16  -4   12.20    1.40
   1  16   5  171.00    6.70
   1  16   5  183.00    6.70
   1  16   5  144.80   10.30
  -1  16  -5  175.70    6.60
   1  16   6   11.50    1.30
   1  16   6   12.60    1.30
   1  16   6    7.90    3.60
  -1  16  -6   13.10    1.40
   1  16   7  176.60    7.00
   1  16   7  201.00    7.30
   1  16   7  151.10   10.30
  -1  16  -7  177.20    7.20
   1  16   8   46.10    2.30
   1  16   8   34.20    5.70
  -1  16  -8   45.90    2.40
   1  16   9    3.90    0.80
   1  16   9    1.40    2.60
  -1  16  -9    3.60    1.20
  -1  16 -10    1.50    1.20
  -1  16 -11   14.60    2.20
  -1  16 -12    2.40    1.50
   1  17 -13   43.20    6.50
   1  17 -12    2.10    1.10
   1  17 -11   32.50    2.80
   1  17 -10    3.70    2.20
   1  17  -9   48.40    3.00
  -1  17   9   42.50    2.30
   1  17  -8    1.70    1.00
  -1  17   8    1.50    0.70
  -1  17   8   -2.80    3.40
   1  17  -7  118.20    5.00
  -1  17   7  122.50    5.00
  -1  17   7  127.10    5.50
   1  17  -6   -0.30    0.90
  -1  17   6    0.30    1.10
  -1  17   6    0.40    1.00
   1  17  -5   44.60    2.70
  -1  17   5   43.80    2.10
  -1  17   5   41.80    2.40
   1  17  -4    5.40    1.50
  -1  17   4    5.70    1.30
   1  17  -3    7.90    1.50
  -1  17   3    9.30    1.40
   1  17  -2    6.40    1.40
  -1  17   2    7.40    1.40
   1  17  -1  131.40    4.90
  -1  17   1  136.60    5.30
   1  17   0    0.00    0.90
  -1  17   0    0.40    1.00
   1  17   1   29.60    1.70
  -1  17  -1   26.30    1.70
   1  17   2   21.90    1.50
  -1  17  -2   19.50    1.80
   1  17   3   52.00    2.40
  -1  17  -3   50.10    2.80
   1  17   4    0.00    1.20
   1  17   4   -0.30    5.20
  -1  17  -4    0.10    1.00
   1  17   5    1.60    0.90
   1  17   5   -2.40    4.10
  -1  17  -5    1.80    1.10
   1  17   6    0.40    1.00
   1  17   6    0.30    1.00
   1  17   6    3.20    3.70
  -1  17  -6   -1.10    1.50
   1  17   7   61.90    3.00
   1  17   7   68.30    3.90
   1  17   7   47.80    5.50
  -1  17  -7   61.80    3.00
   1  17   8    5.80    1.40
   1  17   8   -2.30    5.30
  -1  17  -8    7.00    1.90
   1  17   9  114.20    5.20
  -1  17  -9  102.50    4.70
  -1  17 -10    0.00    1.30
  -1  17 -11   19.40    1.90
  -1  17 -12    1.10    1.70
   1  18 -12    0.10    1.30
   1  18 -11    1.20    1.50
   1  18 -10   18.30    2.30
   1  18  -9   11.70    1.50
  -1  18   9   12.30    1.20
   1  18  -8    4.80    1.30
  -1  18   8    5.50    1.20
  -1  18   8   -1.80    5.00
   1  18  -7    4.10    1.80
  -1  18   7    4.10    1.30
   1  18  -6   -1.20    1.00
  -1  18   6    0.50    0.80
   1  18  -5   43.80    2.30
  -1  18   5   41.40    2.80
   1  18  -4    0.60    0.90
  -1  18   4    0.50    0.90
   1  18  -3    9.80    1.20
  -1  18   3    9.20    1.30
   1  18  -2    4.50    1.10
  -1  18   2    3.80    1.00
   1  18  -1   56.00    2.70
  -1  18   1   59.10    3.20
   1  18   0   39.80    2.40
  -1  18   0   39.00    2.10
   1  18   1  151.50    6.10
  -1  18  -1  157.20    6.20
   1  18   2  152.30    6.00
  -1  18  -2  159.00    6.50
   1  18   3   -0.60    1.30
  -1  18  -3   -2.50    1.40
   1  18   4    5.40    1.40
   1  18   4   -0.20    6.20
  -1  18  -4    8.50    2.00
   1  18   5   15.50    1.30
   1  18   5    0.40    4.80
  -1  18  -5   13.80    1.50
   1  18   6    6.00    1.00
   1  18   6    1.90    3.60
  -1  18  -6    4.70    1.70
   1  18   7   76.90    4.10
   1  18   7   55.30    6.60
  -1  18  -7   82.20    6.80
   1  18   8   19.70    1.60
   1  18   8   14.50    5.70
  -1  18  -8   21.40    2.00
   1  18   9   -0.80    0.70
  -1  18  -9    0.80    1.60
  -1  18 -10   33.90    3.00
  -1  18 -11    0.90    1.80
  -1  18 -12    5.30    2.00
   1  19 -12   32.40    2.70
   1  19 -11    0.40    1.30
   1  19 -10    0.40    1.20
   1  19  -9    3.10    2.10
   1  19  -8    0.90    1.70
  -1  19   8    1.10    1.10
  -1  19   8   -5.40    5.70
   1  19  -7  118.10    5.20
  -1  19   7  125.10    5.60
   1  19  -6    0.00    1.60
  -1  19   6    1.00    1.30
   1  19  -5   72.70    7.50
  -1  19   5   68.80    3.10
   1  19  -4    1.70    1.20
  -1  19   4    1.40    0.90
   1  19  -3   17.50    1.70
  -1  19   3   20.40    1.50
   1  19  -2    3.30    2.30
  -1  19   2    1.90    0.90
   1  19  -1  121.70    5.10
  -1  19   1  122.00    4.90
   1  19   0    3.00    1.40
  -1  19   0    2.30    1.40
   1  19   1   -0.60    0.90
  -1  19  -1   -1.70    2.10
   1  19   2    6.40    4.30
  -1  19  -2    2.30    1.20
   1  19   3   85.60    3.90
  -1  19  -3   82.00    3.70
   1  19   4  203.10    8.10
   1  19   4  157.50   13.30
  -1  19  -4  197.20    7.50
   1  19   5   -1.20    1.30
   1  19   5   -4.40    6.90
  -1  19  -5    0.40    1.60
   1  19   6   49.50    2.70
   1  19   6   29.00    5.60
  -1  19  -6   50.40    3.10
   1  19   7   30.00    1.90
   1  19   7   11.90    5.00
  -1  19  -7   31.90    4.60
   1  19   8    7.90    1.30
  -1  19  -8    8.20    1.50
  -1  19  -9   13.90    1.80
  -1  19 -10    0.90    1.50
  -1  19 -11    0.70    1.60
  -1  19 -12    7.90    1.50
   1  20 -12    0.00    2.40
   1  20 -11    2.20    2.00
   1  20 -10    1.90    1.90
   1  20  -9    4.90    2.10
   1  20  -8   46.30    2.60
  -1  20   8   48.10    3.80
   1  20  -7   33.00    2.70
  -1  20   7   31.50    1.90
   1  20  -6   29.50    2.00
  -1  20   6   32.10    2.20
   1  20  -5   15.20    1.70
  -1  20   5   14.20    1.30
   1  20  -4    8.70    1.60
  -1  20   4    9.40    1.50
   1  20  -3    1.10    1.10
  -1  20   3    0.30    1.50
   1  20  -2   10.50    1.40
  -1  20   2   16.10    4.60
   1  20  -1    2.40    1.30
  -1  20   1    2.60    1.70
   1  20   0    2.10    1.80
  -1  20   0    2.20    1.90
   1  20   1   10.10    1.80
  -1  20  -1   13.00    1.50
   1  20   2    3.40    3.10
  -1  20  -2    2.90    1.20
   1  20   3    8.50    1.30
   1  20   3    0.50    6.30
  -1  20  -3    8.60    1.40
   1  20   4    6.80    1.10
   1  20   4    0.70    7.50
  -1  20  -4   10.00    1.80
   1  20   5   15.30    1.80
   1  20   5    0.80    7.80
  -1  20  -5   16.20    2.10
   1  20   6   15.00    1.50
   1  20   6   -2.00    7.20
  -1  20  -6   14.30    1.70
   1  20   7   12.00    1.20
   1  20   7    6.20    5.00
  -1  20  -7   12.90    1.60
   1  20   8   11.10    1.70
  -1  20  -8   12.30    1.70
  -1  20  -9   10.70    2.00
  -1  20 -10    7.70    2.70
  -1  20 -11    2.60    2.20
  -1  20 -12   36.00    3.10
   1  21 -11   37.70    3.10
   1  21 -10   16.70    2.00
   1  21  -9   15.90    1.80
   1  21  -8   43.30    4.90
  -1  21   8   38.50    2.70
   1  21  -7    6.70    2.00
  -1  21   7    4.20    1.50
   1  21  -6    2.70    1.80
  -1  21   6    2.00    1.10
   1  21  -5   -0.90    1.60
  -1  21   5   -0.30    1.40
   1  21  -4   -1.40    1.20
  -1  21   4    0.80    1.60
   1  21  -3    0.10    1.20
  -1  21   3    1.00    2.10
   1  21  -2   79.80    4.40
  -1  21   2   85.20    4.80
   1  21  -1   33.00    2.60
  -1  21   1   33.50    2.40
   1  21   0   89.40    3.90
  -1  21   0   90.00    4.20
   1  21   1   44.30    2.60
  -1  21  -1   44.70    2.70
   1  21   2  114.80    6.30
  -1  21  -2  105.90    4.80
   1  21   3   54.80    3.70
   1  21   3   17.20    9.20
  -1  21  -3   51.70    2.90
   1  21   4   30.40    2.50
   1  21   4   10.10    8.50
  -1  21  -4   29.60    2.10
   1  21   5   -0.50    0.90
   1  21   5   -1.80    4.90
  -1  21  -5   -0.80    1.30
   1  21   6   22.00    2.30
   1  21   6   15.10    8.30
  -1  21  -6   23.60    2.90
   1  21   7    0.80    1.40
  -1  21  -7    1.30    1.70
   1  21   8   10.10    1.90
  -1  21  -8   21.40    4.90
  -1  21  -9    5.90    2.60
  -1  21 -10   17.00    1.80
   1  22  -9    2.00    3.20
   1  22  -8   10.30    2.00
   1  22  -7    3.30    2.10
  -1  22   7   -0.10    1.60
   1  22  -6   46.60    2.90
  -1  22   6   50.60    3.50
   1  22  -5   35.00    2.50
  -1  22   5   33.50    2.20
   1  22  -4    7.50    2.80
  -1  22   4    5.50    1.50
   1  22  -3    3.20    1.40
  -1  22   3    3.10    1.30
   1  22  -2   11.00    1.80
  -1  22   2   12.60    1.70
   1  22  -1   34.40    2.60
  -1  22   1   34.30    2.70
   1  22   0    6.90    4.10
  -1  22   0    2.50    3.00
   1  22   1    4.30    1.30
  -1  22  -1    4.80    1.40
   1  22   2    3.60    1.50
  -1  22  -2    6.60    2.20
   1  22   3   63.10    3.40
  -1  22  -3   66.30    4.10
   1  22   4   24.00    1.80
  -1  22  -4   27.00    4.10
   1  22   5   19.60    2.20
  -1  22  -5   22.50    2.20
   1  22   6   20.70    1.70
  -1  22  -6   23.40    2.30
   1  22   7   -2.10    1.50
  -1  22  -7    5.40    4.60
  -1  22  -8    9.00    2.00
  -1  22  -9   14.60    1.80
   1  23  -7    4.20    1.60
  -1  23   7    5.30    1.40
   1  23  -6   -1.20    2.00
  -1  23   6   -0.10    1.10
   1  23  -5    2.40    2.00
  -1  23   5    2.70    1.30
   1  23  -4    6.20    2.00
  -1  23   4    6.20    2.10
   1  23  -3   90.80    5.30
  -1  23   3   90.30    4.60
   1  23  -2    2.40    2.00
  -1  23   2    1.40    1.40
   1  23  -1    0.90    1.30
  -1  23   1    2.20    1.90
   1  23   0   50.10    3.00
  -1  23   0   44.70    3.10
   1  23   1   10.00    1.50
  -1  23  -1   10.20    2.20
   1  23   2   55.50    4.20
  -1  23  -2   58.70    3.80
   1  23   3   20.30    3.40
  -1  23  -3   21.20    3.60
   1  23   4    6.30    2.00
  -1  23  -4    7.10    2.60
   1  23   5    7.50    1.80
  -1  23  -5    8.00    2.10
   1  23   6   33.60    2.30
  -1  23  -6   34.90    2.70
   1  23   7    1.80    1.70
  -1  23  -7    0.90    2.50
  -1  24   7    3.80    2.30
  -1  24   6    1.00    1.40
   1  24  -5   11.70    1.80
  -1  24   5   13.60    2.90
   1  24  -4    7.40    1.80
  -1  24   4   14.00    4.50
   1  24  -3   36.10    2.90
  -1  24   3   36.80    3.30
   1  24  -2    0.60    1.30
  -1  24   2    0.80    1.30
   1  24  -1   44.40    3.40
  -1  24   1   46.80    2.90
   1  24   0    1.10    1.40
  -1  24   0    0.10    2.00
   1  24   1    5.30    2.60
  -1  24  -1    4.70    2.10
   1  24   2    5.40    1.60
  -1  24  -2    3.50    1.50
   1  24   3   15.50    2.30
  -1  24  -3   12.10    2.00
   1  24   4   -0.90    1.50
  -1  24  -4    1.30    1.70
   1  24   5    0.30    1.50
   1  24   6    6.60    2.10
   1  24   7    0.20    1.30
  -1  25   6    1.80    2.40
  -1  25   5   12.10    2.60
  -1  25   4    1.30    1.30
  -1  25   3   26.20    2.90
   1  25  -2   18.20    3.10
  -1  25   2   18.20    2.70
   1  25  -1   16.30    2.40
  -1  25   1   13.30    2.10
   1  25   0   17.90    2.50
  -1  25   0   16.00    2.80
   1  25   1   18.60    2.00
  -1  25  -1   15.50    2.20
   1  25   2    2.30    2.30
  -1  25  -2    2.40    1.50
   1  25   3   10.30    2.30
   1  25   4    4.40    2.40
   1  25   5   12.40    2.70
   1  25   6   34.20    2.70
  -1  26   5    1.20    1.90
  -1  26   4   21.60    2.70
  -1  26   3   10.40    4.30
   1  26   3    5.80    2.00
   1  26   4    0.60    1.70
   1  26   5   22.30    2.60
  -2   0  16    6.20    2.00
  -2   0  15    0.30    1.50
  -2   0  14   11.00    1.70
  -2   0  13    0.70    1.70
  -2   0  12  144.30    5.60
  -2   0  11    0.20    0.80
  -2   0  10  359.20   12.80
   2   0  -9    0.90    0.20
   2   0  -9    0.50    0.10
   2   0  -9    0.70    0.50
  -2   0   9   -0.70    0.60
   2   0  -8  235.30    8.20
   2   0  -8  235.60    8.30
   2   0  -8  258.60    9.80
  -2   0   8  256.30    9.50
   2   0  -7   -0.20    0.20
   2   0  -7   -0.20    0.90
  -2   0   7    0.00    0.20
  -2   0   7   -0.40    0.50
   2   0  -6  280.40   10.10
   2   0  -6  302.30   11.40
  -2   0   6  287.30   10.20
  -2   0   6  319.30   10.40
   2   0  -5   -0.30    0.20
   2   0  -5   -0.60    0.80
  -2   0   5   -0.10    0.20
  -2   0   5   -0.20    0.70
  -2   0   5    0.80    0.80
   2   0  -4  388.20   13.70
   2   0  -4  423.30   15.80
  -2   0   4  398.70   14.10
  -2   0   4  394.00   13.70
  -2   0   4  425.50   15.60
   2   0  -3   -0.10    0.30
   2   0  -3   -0.10    0.20
   2   0  -3   -0.10    0.70
  -2   0   3   -0.10    0.20
  -2   0   3   -0.10    0.70
  -2   0   3   -0.10    0.90
   2   0  -2    0.30    0.20
   2   0  -2    0.80    0.80
  -2   0   2    0.30    0.30
  -2   0   2    0.70    0.30
  -2   0   2    1.30    1.00
   2   0  -1    0.10    0.30
   2   0  -1    1.20    0.20
   2   0  -1    0.90    0.80
  -2   0   1    0.50    0.20
  -2   0   1    0.20    0.10
  -2   0   1    2.00    1.10
   2   0   0  951.90   31.70
   2   0   0 1025.50   35.30
  -2   0   0  927.30   32.20
  -2   0   0 1043.30   35.60
   2   0   1    0.90    0.40
   2   0   1    0.40    0.10
   2   0   1   -0.90    1.20
  -2   0  -1    0.50    0.20
  -2   0  -1    0.50    1.10
   2   0   2   52.40    2.20
   2   0   2   52.90    2.00
   2   0   2   56.00    2.90
  -2   0  -2   50.70    2.60
  -2   0  -2   58.70    3.90
   2   0   3   -0.20    0.30
   2   0   3    0.10    0.30
   2   0   3   -0.90    1.20
  -2   0  -3    0.20    0.90
  -2   0  -3   -0.90    0.80
   2   0   4    2.10    0.40
   2   0   4    2.40    0.50
   2   0   4    1.80    1.10
  -2   0  -4    1.70    0.30
  -2   0  -4    1.20    1.20
   2   0   5    0.00    0.30
   2   0   5   -0.10    0.30
   2   0   5    0.40    1.10
  -2   0  -5   -0.30    0.20
  -2   0  -5    0.20    0.90
   2   0   6   12.30    0.70
   2   0   6   13.90    0.90
  -2   0  -6   12.10    0.70
  -2   0  -6   11.20    1.80
   2   0   7    0.00    0.30
   2   0   7    0.00    0.50
  -2   0  -7    0.00    0.30
  -2   0  -7    0.20    1.30
   2   0   8  758.00   26.10
   2   0   8  740.80   26.20
  -2   0  -8  762.10   25.60
  -2   0  -8  812.00   28.10
   2   0   9    0.20    0.40
   2   0   9   -0.20    0.90
  -2   0  -9   -0.10    0.30
  -2   0  -9    0.70    1.70
   2   0  10   12.50    0.70
   2   0  10   13.10    1.40
  -2   0 -10   11.70    0.80
  -2   0 -10   10.40    2.00
   2   0  11    0.00    0.30
   2   0  11    0.50    1.00
  -2   0 -11    0.10    0.30
  -2   0 -11    0.40    1.40
   2   0  12    7.90    1.40
  -2   0 -12    8.40    0.50
  -2   0 -12    8.00    1.20
   2   0  13   -0.80    1.20
   2   0  14   15.60    1.90
   2   0  15    0.20    1.70
   2   0  16   57.90    3.50
  -2   1  16    4.60    1.40
  -2  -1  16    4.00    1.40
  -2   1  15    6.90    1.30
  -2  -1  15    7.40    1.30
  -2   1  14    8.50    1.30
  -2  -1  14   10.40    1.50
  -2   1  13   24.50    2.50
  -2  -1  13   24.50    2.70
  -2   1  12   53.10    2.60
  -2  -1  12   55.00    2.80
  -2   1  11    9.20    1.10
  -2  -1  11    9.20    1.00
   2   1 -10   60.00    2.20
   2   1 -10   59.60    2.20
   2   1 -10   61.80    2.90
  -2   1  10   58.50    2.70
  -2  -1  10   56.40    2.70
   2   1  -9   35.00    1.50
   2   1  -9   36.60    1.50
   2   1  -9   39.50    2.30
  -2   1   9   35.00    1.80
  -2  -1   9   34.60    2.00
   2   1  -8   28.20    1.30
   2   1  -8   28.30    1.30
   2   1  -8   30.20    2.10
  -2   1   8   27.40    2.00
  -2  -1   8   26.20    2.10
   2  -1  -8   28.30    1.00
   2   1  -7    7.20    0.50
   2   1  -7    8.10    0.80
   2   1  -7    5.00    1.30
  -2   1   7    8.10    0.40
  -2   1   7    8.90    0.70
  -2  -1   7    9.10    1.10
  -2  -1   7    7.70    0.70
   2  -1  -7    7.60    0.40
   2  -1  -7    8.30    0.90
   2   1  -6 1792.90   57.70
   2   1  -6 1709.90   61.40
   2   1  -6 1848.50   63.10
  -2   1   6 1771.50   57.00
  -2   1   6 1796.90   58.90
  -2   1   6 1873.00   64.20
  -2  -1   6 1798.90   59.20
  -2  -1   6 1787.30   59.60
   2  -1  -6 1773.70   57.10
   2  -1  -6 1931.50   61.60
   2   1  -5   11.70    0.70
   2   1  -5   10.10    0.80
   2   1  -5   11.40    1.60
  -2   1   5   12.70    0.70
  -2   1   5   11.50    1.00
  -2   1   5   10.70    1.20
  -2  -1   5   12.30    0.70
  -2  -1   5    9.90    0.90
   2  -1  -5   12.70    0.60
   2  -1  -5   12.90    1.30
   2   1  -4 1042.70   34.30
   2   1  -4 1060.30   35.10
   2   1  -4 1085.50   38.50
  -2   1   4 1061.10   35.00
  -2   1   4 1074.50   35.20
  -2   1   4 1127.80   39.90
  -2  -1   4 1034.40   34.40
  -2  -1   4 1086.70   34.90
  -2  -1   4 1106.50   40.40
   2  -1  -4 1027.50   34.90
   2  -1  -4 1117.70   38.70
   2   1  -3  290.00   10.10
   2   1  -3  299.70   10.50
   2   1  -3  302.70   12.10
  -2   1   3  293.60   10.60
  -2   1   3  302.00   10.50
  -2   1   3  312.10   13.10
  -2  -1   3  292.60   10.60
  -2  -1   3  303.10   10.40
  -2  -1   3  318.70   12.90
   2  -1  -3  288.60   10.40
   2  -1  -3  312.20   11.90
   2   1  -2   18.50    0.80
   2   1  -2   20.00    0.90
   2   1  -2   17.70    1.60
  -2   1   2   19.10    1.40
  -2   1   2   20.50    1.70
  -2  -1   2   18.40    0.80
  -2  -1   2   19.90    0.80
  -2  -1   2   18.40    1.40
   2  -1  -2   18.10    0.90
   2  -1  -2   19.20    1.70
   2   1  -1   33.00    1.40
   2   1  -1   33.90    1.40
   2   1  -1   28.50    2.20
  -2   1   1   32.80    1.50
  -2   1   1   37.10    2.10
  -2  -1   1   33.60    1.40
  -2  -1   1   33.60    2.10
   2  -1  -1   33.10    1.30
   2  -1  -1   38.40    2.10
   2   1   0  597.10   20.60
   2   1   0  621.10   22.60
  -2   1   0  579.10   20.40
  -2   1   0  646.70   23.90
  -2  -1   0  567.20   19.90
  -2  -1   0  643.90   24.00
   2  -1   0  591.50   20.10
   2  -1   0  609.20   22.30
   2   1   1   39.70    1.60
   2   1   1   32.20    2.60
  -2   1  -1   37.40    1.70
  -2   1  -1   40.60    1.80
  -2   1  -1   46.10    2.50
  -2  -1  -1   39.90    1.80
  -2  -1  -1   44.70    2.40
   2  -1   1   40.20    1.70
   2  -1   1   42.10    2.60
   2   1   2    4.50    0.50
   2   1   2    3.90    1.20
  -2   1  -2    3.90    0.40
  -2   1  -2    3.60    0.30
  -2   1  -2    3.10    1.30
  -2  -1  -2    3.80    0.40
  -2  -1  -2    3.10    1.20
   2  -1   2    3.50    0.30
   2  -1   2    3.60    0.30
   2  -1   2    2.60    0.90
   2   1   3   -0.10    0.30
   2   1   3   -1.40    1.10
  -2   1  -3    1.90    1.40
  -2   1  -3    0.10    0.20
  -2   1  -3    0.80    0.90
  -2  -1  -3    0.10    0.90
  -2  -1  -3   -0.70    1.00
   2  -1   3    0.00    0.20
   2  -1   3   -0.40    0.30
   2  -1   3   -0.40    0.80
   2   1   4    2.90    0.30
   2   1   4    3.60    0.40
   2   1   4    2.20    1.00
  -2   1  -4    2.90    0.40
  -2   1  -4    3.20    0.50
  -2   1  -4    3.60    1.40
  -2  -1  -4    3.00    0.40
  -2  -1  -4    2.90    1.30
   2  -1   4    3.00    0.30
   2  -1   4    2.50    0.50
   2   1   5   17.40    0.90
   2   1   5   17.40    0.90
   2   1   5   13.70    1.80
  -2   1  -5   18.20    0.90
  -2   1  -5   16.70    1.10
  -2   1  -5   22.30    2.20
  -2  -1  -5   17.70    0.90
  -2  -1  -5   18.70    1.60
   2  -1   5   18.70    1.00
   2  -1   5   19.10    1.20
   2   1   6  119.40    4.50
   2   1   6  116.20    4.70
   2   1   6  117.20    5.20
  -2   1  -6  112.40    4.40
  -2   1  -6  126.10    5.90
  -2  -1  -6  115.20    4.60
  -2  -1  -6  123.90    5.50
   2  -1   6  117.20    4.30
   2  -1   6  117.80    4.40
   2   1   7   16.40    0.90
   2   1   7   14.40    1.00
  -2   1  -7   15.60    1.00
  -2   1  -7   18.30    2.40
  -2  -1  -7   17.10    0.90
  -2  -1  -7   17.30    1.70
   2  -1   7   15.60    0.90
   2  -1   7   14.10    1.00
   2   1   8    5.30    0.40
   2   1   8    7.10    0.80
  -2   1  -8    5.40    0.50
  -2   1  -8    4.00    1.80
  -2  -1  -8    5.70    0.50
  -2  -1  -8    6.60    1.50
   2  -1   8    5.30    0.50
   2  -1   8    9.20    1.00
   2   1   9    1.90    0.40
   2   1   9    2.80    0.90
  -2   1  -9    1.80    0.40
  -2   1  -9    1.90    1.80
  -2  -1  -9    2.10    0.30
  -2  -1  -9   -0.20    1.60
   2  -1   9    2.00    0.40
   2  -1   9    1.90    0.70
   2   1  10   16.60    0.80
   2   1  10   17.70    1.50
  -2   1 -10   17.50    1.20
  -2   1 -10   16.60    2.40
  -2  -1 -10   17.40    0.90
  -2  -1 -10   15.80    1.90
   2  -1  10   16.20    0.90
   2  -1  10   16.10    1.20
   2   1  11   23.00    1.30
   2   1  11   21.80    1.70
  -2   1 -11   21.50    1.20
  -2   1 -11   21.50    2.50
  -2  -1 -11   20.70    1.00
  -2  -1 -11   22.40    1.70
   2  -1  11   19.80    1.00
   2  -1  11   22.20    1.60
   2   1  12   19.60    1.50
  -2   1 -12   20.50    1.20
  -2   1 -12   20.70    2.40
   2  -1  12   21.60    1.80
   2   1  13    0.90    0.90
   2  -1  13    1.10    0.90
   2   1  14  134.60    6.10
   2  -1  14  137.50    6.40
   2   1  15    3.50    1.20
   2  -1  15    2.60    1.30
   2   1  16   74.80    4.70
   2  -1  16   72.30    4.30
  -2   2  16    2.90    1.30
  -2  -2  16    4.80    1.60
  -2   2  15    5.90    1.40
  -2  -2  15    5.70    1.80
  -2   2  14  112.70    4.90
  -2  -2  14  108.90    5.60
  -2   2  13  105.60    5.30
  -2  -2  13  100.80    4.70
  -2   2  12   57.20    2.80
  -2  -2  12   57.70    3.00
   2   2 -11  123.00    4.60
   2   2 -11  122.00    4.50
   2   2 -11  132.70    5.20
  -2   2  11  123.20    4.90
  -2  -2  11  122.90    5.30
   2   2 -10   16.40    0.80
   2   2 -10   16.40    0.80
   2   2 -10   15.80    1.80
  -2   2  10   13.90    1.10
  -2  -2  10   13.20    1.30
   2   2  -9   61.80    2.40
   2   2  -9   61.50    2.40
   2   2  -9   62.20    3.70
  -2   2   9   65.20    3.00
  -2  -2   9   66.90    2.70
   2   2  -8   47.90    1.90
   2   2  -8   47.90    2.00
   2   2  -8   45.60    2.40
   2   2  -8   46.50    2.90
  -2   2   8   53.50    2.90
  -2  -2   8   49.10    2.80
   2   2  -7  145.60    5.20
   2   2  -7  149.10    5.20
   2   2  -7  143.00    5.80
   2   2  -7  154.50    6.50
  -2   2   7  149.80    5.00
  -2   2   7  149.20    5.60
  -2  -2   7  148.10    5.70
   2  -2  -7  148.60    5.20
   2   2  -6  242.70    9.00
   2   2  -6  258.10    9.60
   2   2  -6  262.60   10.40
  -2   2   6  252.00    8.90
  -2   2   6  268.50    9.30
  -2   2   6  267.30   10.30
  -2  -2   6  256.40    9.20
  -2  -2   6  262.30    9.20
   2  -2  -6  248.50    8.80
   2   2  -5  631.80   21.00
   2   2  -5  627.20   22.00
   2   2  -5  678.80   23.80
  -2   2   5  632.00   21.80
  -2   2   5  653.60   22.00
  -2   2   5  669.50   25.10
  -2  -2   5  640.20   21.70
  -2  -2   5  655.50   21.90
   2  -2  -5  624.70   21.20
   2  -2  -5  673.30   23.60
   2   2  -4   11.90    0.60
   2   2  -4   10.00    0.60
   2   2  -4   12.50    1.80
  -2   2   4   12.20    0.60
  -2   2   4   13.50    1.30
  -2  -2   4   11.40    0.70
  -2  -2   4   10.50    0.60
  -2  -2   4    9.50    1.60
   2  -2  -4   11.70    0.60
   2  -2  -4   12.20    1.40
   2   2  -3    1.40    0.30
   2   2  -3    1.30    0.30
   2   2  -3    1.90    1.50
  -2   2   3    1.50    0.30
  -2   2   3    0.90    1.00
  -2  -2   3    1.10    0.40
  -2  -2   3    0.20    1.20
   2  -2  -3    1.30    0.30
   2  -2  -3    2.90    1.10
   2   2  -2  226.20    7.70
   2   2  -2  238.00    8.40
   2   2  -2  238.20    9.50
  -2   2   2  228.10    8.40
  -2   2   2  236.50   10.00
  -2  -2   2  224.30    9.00
  -2  -2   2  241.40   10.50
   2  -2  -2  225.20    7.80
   2  -2  -2  240.00    9.50
   2   2  -1  579.90   19.00
   2   2  -1  615.60   21.90
  -2   2   1  561.00   19.90
  -2   2   1  596.00   22.30
  -2  -2   1  568.50   19.90
  -2  -2   1  618.70   21.40
   2  -2  -1  567.60   18.90
   2  -2  -1  607.50   21.40
   2   2   0  598.10   20.20
   2   2   0  624.50   22.70
  -2   2   0  581.70   20.20
  -2   2   0  632.80   21.90
  -2  -2   0  592.80   21.50
  -2  -2   0  635.50   23.60
   2  -2   0  577.60   19.50
   2  -2   0  592.00   21.10
   2   2   1  327.00   11.30
   2   2   1  357.20   13.50
  -2   2  -1  312.30   11.00
  -2   2  -1  347.00   13.40
  -2  -2  -1  314.60   11.20
  -2  -2  -1  334.50   13.80
   2  -2   1  321.80   11.00
   2  -2   1  338.00   13.20
   2   2   2 1376.90   47.80
   2   2   2 1432.20   54.40
  -2   2  -2 1326.60   45.90
  -2   2  -2 1391.40   45.10
  -2   2  -2 1474.20   48.90
  -2  -2  -2 1331.30   45.50
  -2  -2  -2 1472.60   49.50
   2  -2   2 1372.20   44.20
   2   2   3    0.80    0.30
   2   2   3    0.70    1.30
  -2   2  -3    0.40    0.40
  -2   2  -3    0.10    0.30
  -2   2  -3   -0.20    1.30
  -2  -2  -3    1.10    0.90
  -2  -2  -3   -0.30    0.80
   2  -2   3    0.50    0.30
   2   2   4    1.60    0.30
   2   2   4    0.70    1.00
  -2   2  -4    1.40    0.50
  -2   2  -4    1.60    0.50
  -2   2  -4    1.00    1.10
  -2  -2  -4    1.30    0.30
  -2  -2  -4    0.90    1.20
   2  -2   4    1.30    0.30
   2  -2   4    1.30    0.30
   2   2   5   60.90    2.50
   2   2   5   62.20    2.40
   2   2   5   62.20    3.60
  -2   2  -5   62.40    2.90
  -2   2  -5   68.80    3.50
  -2   2  -5   67.80    3.90
  -2  -2  -5   60.60    2.60
  -2  -2  -5   68.60    4.20
   2  -2   5   61.70    2.40
   2  -2   5   61.70    2.60
   2   2   6  108.40    4.30
   2   2   6  113.40    4.20
   2   2   6  106.60    5.10
  -2   2  -6  105.20    4.20
  -2   2  -6  106.00    4.30
  -2   2  -6  114.30    5.90
  -2  -2  -6  111.80    4.30
  -2  -2  -6  120.90    5.60
   2  -2   6  109.20    4.20
   2  -2   6  110.60    4.10
   2   2   7   71.30    2.70
   2   2   7   65.60    2.70
   2   2   7   68.60    3.60
  -2   2  -7   68.90    2.90
  -2   2  -7   64.40    3.00
  -2   2  -7   72.40    4.60
  -2  -2  -7   65.90    2.60
  -2  -2  -7   69.60    4.30
   2  -2   7   70.00    2.70
   2  -2   7   62.50    2.70
   2   2   8   87.90    3.30
   2   2   8   91.00    4.10
  -2   2  -8   84.80    3.60
  -2   2  -8   93.00    5.20
  -2  -2  -8   88.80    3.60
  -2  -2  -8   97.10    4.80
   2  -2   8   86.40    3.60
   2  -2   8   84.10    3.80
   2   2   9    7.60    0.50
   2   2   9    7.90    0.90
  -2   2  -9    8.10    0.70
  -2   2  -9    8.00    2.10
  -2  -2  -9    7.60    0.50
  -2  -2  -9    5.70    1.60
   2  -2   9    7.50    0.60
   2  -2   9    7.10    1.00
   2   2  10    4.60    0.30
   2   2  10    6.20    1.20
  -2   2 -10    5.10    0.60
  -2   2 -10    2.70    1.90
  -2  -2 -10    5.00    0.40
  -2  -2 -10    4.90    1.20
   2  -2  10    3.70    0.50
   2  -2  10    5.80    0.80
   2   2  11    0.60    0.80
  -2   2 -11    1.60    0.50
  -2   2 -11    2.10    2.30
   2  -2  11    1.60    0.40
   2  -2  11    1.90    1.10
   2   2  12    0.70    0.90
  -2   2 -12    0.00    0.40
  -2   2 -12    1.00    1.60
   2  -2  12    0.70    0.80
   2   2  13   47.60    2.30
   2  -2  13   47.80    3.00
   2   2  14    6.60    2.70
   2  -2  14    5.10    1.60
   2   2  15   96.00    5.00
   2   2  16   12.50    1.80
  -2   3  16   33.10    3.40
  -2   3  15   25.50    2.50
  -2   3  14    1.90    1.50
  -2  -3  14    1.30    1.40
  -2   3  13  152.90    6.00
  -2  -3  13  141.40    7.30
   2   3 -12   80.80    3.40
   2   3 -12   79.60    3.00
   2   3 -12   86.10    4.10
  -2   3  12   73.60    3.50
  -2  -3  12   71.50    3.90
   2   3 -11  191.70    6.90
   2   3 -11  193.00    6.90
   2   3 -11  199.50    8.50
  -2   3  11  195.90    7.70
  -2  -3  11  184.00    8.10
   2   3 -10   58.00    2.40
   2   3 -10   59.00    2.40
   2   3 -10   59.90    3.50
   2   3 -10   64.70    4.30
  -2   3  10   63.60    2.80
  -2  -3  10   64.60    2.90
   2   3  -9  148.40    5.50
   2   3  -9  155.30    5.30
   2   3  -9  146.60    6.10
   2   3  -9  165.40    7.20
  -2   3   9  160.20    6.40
  -2  -3   9  152.30    6.20
   2   3  -8   48.20    2.00
   2   3  -8   52.60    1.90
   2   3  -8   48.00    2.30
   2   3  -8   46.00    3.20
  -2   3   8   51.20    2.60
  -2  -3   8   48.10    2.50
   2   3  -7  102.80    4.00
   2   3  -7  101.90    3.90
   2   3  -7  102.90    4.20
   2   3  -7  107.90    5.40
  -2   3   7  100.80    3.80
  -2   3   7  111.10    4.20
  -2   3   7  106.40    4.20
  -2  -3   7  108.00    4.40
   2  -3  -7  101.80    3.60
   2   3  -6  120.70    4.30
   2   3  -6  118.70    4.60
   2   3  -6  127.80    5.90
  -2   3   6  122.20    4.60
  -2   3   6  122.80    5.70
  -2  -3   6  120.70    4.90
  -2  -3   6  122.90    4.70
   2  -3  -6  120.00    4.50
   2   3  -5   18.90    0.90
   2   3  -5   17.40    0.90
   2   3  -5   15.60    1.70
  -2   3   5   19.90    0.90
  -2   3   5   19.10    1.70
  -2  -3   5   19.90    1.00
   2  -3  -5   21.30    1.00
   2   3  -4   79.20    2.90
   2   3  -4   86.10    4.60
   2   3  -4   84.90    4.10
  -2   3   4   79.00    3.00
  -2   3   4   80.00    4.00
  -2  -3   4   80.50    3.10
   2  -3  -4   82.90    3.20
   2   3  -3   94.00    3.40
   2   3  -3   99.80    3.70
   2   3  -3  108.40    4.70
  -2   3   3   93.00    3.60
  -2   3   3  104.60    4.40
  -2  -3   3   93.90    3.50
  -2  -3   3   98.70    5.00
   2  -3  -3   96.00    3.50
   2   3  -2    1.70    0.30
   2   3  -2    2.20    1.40
  -2   3   2    0.60    0.30
  -2   3   2   -1.40    1.20
  -2  -3   2    0.80    0.30
  -2  -3   2    0.80    1.40
   2  -3  -2    0.90    0.40
   2   3  -1   12.80    0.80
   2   3  -1   13.50    1.70
  -2   3   1   12.80    0.70
  -2   3   1   14.70    1.70
  -2  -3   1   13.30    0.70
  -2  -3   1   14.20    1.70
   2  -3  -1   12.50    0.70
   2   3   0   30.30    1.30
   2   3   0   36.50    2.40
  -2   3   0   30.70    1.40
  -2   3   0   33.40    2.20
  -2  -3   0   31.20    1.30
  -2  -3   0   36.20    2.50
   2  -3   0   30.70    1.30
   2   3   1   64.50    2.50
   2   3   1   68.40    3.60
  -2   3  -1   65.40    2.70
  -2   3  -1   74.00    3.80
  -2  -3  -1   65.00    2.70
  -2  -3  -1   67.60    3.50
   2  -3   1   69.40    3.20
   2   3   2  175.70    6.20
   2   3   2  181.40    9.30
  -2   3  -2  167.80    6.20
  -2   3  -2  186.50    8.90
  -2  -3  -2  170.90    7.70
  -2  -3  -2  188.80    9.10
   2  -3   2  176.50    6.10
   2   3   3   44.80    2.10
   2   3   3   45.40    3.50
  -2   3  -3   44.20    1.90
  -2   3  -3   46.80    1.90
  -2   3  -3   49.50    3.10
  -2  -3  -3   43.20    2.10
  -2  -3  -3   44.80    2.80
   2  -3   3   44.80    1.80
   2   3   4    0.30    0.30
   2   3   4   -1.00    0.80
  -2   3  -4    1.30    0.50
  -2   3  -4    0.30    0.30
  -2   3  -4   -0.40    1.10
  -2  -3  -4    0.50    0.30
  -2  -3  -4    1.20    1.30
   2  -3   4    0.50    0.40
   2   3   5    0.90    0.20
   2   3   5    0.50    1.10
  -2   3  -5    0.70    0.50
  -2   3  -5    1.20    0.60
  -2   3  -5    1.20    1.30
  -2  -3  -5    1.20    0.40
  -2  -3  -5    0.60    0.80
   2  -3   5    1.00    0.50
   2   3   6    5.10    0.40
   2   3   6    4.30    1.30
  -2   3  -6    5.90    0.60
  -2   3  -6    4.30    0.40
  -2   3  -6    6.90    2.20
  -2  -3  -6    5.40    0.50
  -2  -3  -6    3.50    1.70
   2  -3   6    5.50    0.60
   2  -3   6    4.30    0.50
   2   3   7  156.20    6.20
   2   3   7  156.90    6.30
   2   3   7  157.60    7.10
  -2   3  -7  159.60    6.80
  -2   3  -7  153.00    6.10
  -2   3  -7  168.70    7.90
  -2  -3  -7  150.60    5.60
  -2  -3  -7  162.10    8.00
   2  -3   7  157.40    5.80
   2  -3   7  159.00    6.30
   2   3   8   89.60    3.20
   2   3   8   89.70    3.50
   2   3   8   79.60    4.60
  -2   3  -8   91.20    4.00
  -2   3  -8   87.20    3.90
  -2   3  -8   93.20    5.90
  -2  -3  -8   87.60    3.60
  -2  -3  -8   98.10    4.90
   2  -3   8   86.70    3.50
   2  -3   8   87.80    4.00
   2   3   9   59.50    2.30
   2   3   9   56.80    2.60
  -2   3  -9   59.60    2.70
  -2   3  -9   58.40    4.20
  -2  -3  -9   59.80    2.60
  -2  -3  -9   64.30    3.50
   2  -3   9   59.80    2.40
   2  -3   9   55.20    2.80
   2   3  10  105.50    4.10
   2   3  10  105.80    4.70
  -2   3 -10  100.30    4.20
  -2   3 -10  115.30    6.40
  -2  -3 -10  106.10    3.90
   2  -3  10  104.20    3.90
   2  -3  10   98.20    4.70
   2   3  11    6.10    0.90
  -2   3 -11    6.60    0.70
  -2   3 -11    7.60    2.80
   2  -3  11    6.70    0.70
   2  -3  11    7.50    1.30
   2   3  12   12.20    1.60
  -2   3 -12   12.20    1.00
  -2   3 -12   11.70    2.70
   2  -3  12   11.50    1.10
   2   3  13   11.60    1.60
   2   3  14    5.50    2.00
   2   3  15    6.90    2.30
   2   3  16   -0.20    2.00
  -2   4  16   11.60    2.30
  -2   4  15   16.90    2.00
  -2   4  14   34.90    2.60
  -2   4  13    8.60    2.30
   2   4 -12   35.50    1.50
   2   4 -12   33.80    1.50
   2   4 -12   36.00    3.00
  -2   4  12   36.10    2.20
   2   4 -11   55.40    2.60
   2   4 -11   55.20    2.50
   2   4 -11   57.60    4.10
  -2   4  11   55.30    2.70
   2   4 -10   21.90    1.10
   2   4 -10   21.50    1.10
   2   4 -10   20.40    2.10
   2   4 -10   20.50    2.60
  -2   4  10   19.60    1.40
   2   4  -9    2.10    0.50
   2   4  -9    2.10    0.50
   2   4  -9    2.10    0.70
   2   4  -9    3.00    1.80
  -2   4   9    2.00    1.00
   2   4  -8    8.20    0.60
   2   4  -8    7.70    0.70
   2   4  -8    7.20    0.90
   2   4  -8    7.30    2.00
  -2   4   8    8.70    1.50
   2   4  -7   35.30    1.50
   2   4  -7   36.40    1.50
   2   4  -7   32.70    1.70
   2   4  -7   33.20    3.00
  -2   4   7   36.00    1.40
  -2   4   7   36.00    2.00
   2  -4  -7   37.70    1.50
   2   4  -6    6.30    0.60
   2   4  -6    7.30    0.70
   2   4  -6    6.60    2.10
  -2   4   6    6.50    0.50
  -2   4   6    5.10    1.00
  -2  -4   6    6.90    0.60
   2  -4  -6    6.60    0.40
   2   4  -5  100.80    3.80
   2   4  -5  100.10    3.70
   2   4  -5  104.30    4.90
  -2   4   5   95.40    3.60
  -2   4   5  102.60    5.00
  -2  -4   5   99.70    3.60
   2  -4  -5   99.50    3.80
   2   4  -4    3.50    0.50
   2   4  -4    4.20    0.50
   2   4  -4    3.10    1.70
  -2   4   4    3.80    0.30
  -2   4   4    3.30    1.30
  -2  -4   4    4.00    0.50
   2  -4  -4    3.80    0.40
   2   4  -3   64.70    2.50
   2   4  -3   70.30    3.60
  -2   4   3   65.40    2.50
  -2   4   3   65.90    3.40
  -2  -4   3   66.40    2.60
   2  -4  -3   64.90    2.40
   2   4  -2  489.20   16.00
   2   4  -2  500.00   18.60
  -2   4   2  489.00   16.40
  -2   4   2  519.30   19.60
  -2  -4   2  488.30   15.90
   2  -4  -2  477.80   16.00
   2   4  -1   24.50    1.10
   2   4  -1   27.90    2.20
  -2   4   1   24.10    1.00
  -2  -4   1   24.50    1.10
  -2  -4   1   27.00    2.70
   2  -4  -1   24.50    1.00
   2   4   0  293.30    9.80
   2   4   0  306.90   11.40
  -2   4   0  286.30   10.10
  -2  -4   0  283.60   10.30
  -2  -4   0  306.50   13.10
   2  -4   0  281.80    9.70
   2   4   1 3154.10   98.50
   2   4   1 3290.50  115.70
  -2   4  -1 3060.00   98.40
  -2  -4  -1 2986.30   99.10
  -2  -4  -1 3261.00  106.70
   2  -4   1 3014.30   97.60
   2   4   2    4.60    0.60
   2   4   2    5.90    2.00
  -2   4  -2    4.80    0.50
  -2  -4  -2    5.10    0.40
  -2  -4  -2    5.30    1.40
   2  -4   2    4.80    0.50
   2   4   3   87.00    3.40
   2   4   3   82.30    4.50
  -2   4  -3   84.60    3.20
  -2   4  -3   88.10    3.40
  -2  -4  -3   83.20    4.20
  -2  -4  -3   92.20    5.20
   2  -4   3   87.90    4.00
   2   4   4   76.10    3.30
   2   4   4   75.70    4.70
  -2   4  -4   75.20    3.40
  -2   4  -4   72.60    2.90
  -2  -4  -4   73.60    3.50
  -2  -4  -4   77.20    4.20
   2  -4   4   75.40    2.90
   2   4   5   25.30    1.20
   2   4   5   23.90    2.20
  -2   4  -5   24.50    1.20
  -2   4  -5   22.30    1.10
  -2   4  -5   25.80    3.00
  -2  -4  -5   24.60    1.10
  -2  -4  -5   25.40    2.30
   2  -4   5   26.20    1.20
   2   4   6   13.40    0.80
   2   4   6   12.60    1.70
  -2   4  -6   13.40    1.00
  -2   4  -6   11.60    0.80
  -2   4  -6   11.10    1.80
  -2  -4  -6   13.00    0.80
  -2  -4  -6   13.20    1.90
   2  -4   6   12.70    0.80
   2   4   7   23.60    1.10
   2   4   7   19.30    2.00
  -2   4  -7   23.20    1.30
  -2   4  -7   24.40    1.50
  -2   4  -7   31.60    3.10
  -2  -4  -7   23.50    1.30
  -2  -4  -7   22.40    2.10
   2  -4   7   24.60    1.30
   2   4   8   20.10    1.00
   2   4   8   21.00    1.20
   2   4   8   16.80    1.70
  -2   4  -8   18.80    1.10
  -2   4  -8   19.80    1.50
  -2   4  -8   17.70    2.40
  -2  -4  -8   20.00    1.10
  -2  -4  -8   22.90    2.10
   2  -4   8   19.60    1.30
   2   4   9   72.80    2.80
   2   4   9   73.20    3.70
  -2   4  -9   72.40    3.30
  -2   4  -9   73.80    3.30
  -2   4  -9   78.70    4.80
  -2  -4  -9   71.90    2.90
   2  -4   9   73.40    2.90
   2   4  10   23.70    1.10
   2   4  10   29.00    2.10
  -2   4 -10   23.00    1.40
  -2   4 -10   24.40    1.50
  -2   4 -10   23.70    3.30
  -2  -4 -10   25.70    1.20
   2  -4  10   24.20    1.30
   2   4  11   46.00    2.50
  -2   4 -11   43.50    2.30
  -2   4 -11   41.90    4.00
   2  -4  11   44.20    1.90
   2   4  12    3.40    1.40
  -2   4 -12    3.90    0.70
  -2   4 -12    6.20    2.40
   2   4  13   11.50    3.70
   2   4  14    9.40    2.30
   2   4  15   44.80    2.80
   2   4  16    1.80    2.20
  -2   5  16    2.40    2.20
  -2   5  15   37.70    2.80
  -2   5  14    0.30    2.10
   2   5 -13  221.50    8.60
  -2   5  13  229.30    8.60
   2   5 -12   23.70    1.30
   2   5 -12   24.80    1.40
   2   5 -12   24.60    3.10
  -2   5  12   24.70    2.10
   2   5 -11    1.20    0.50
   2   5 -11    1.40    0.60
   2   5 -11    0.40    2.30
  -2   5  11    1.30    0.90
   2   5 -10   10.40    0.80
   2   5 -10   12.10    1.70
   2   5 -10    8.20    1.10
   2   5 -10    7.30    2.70
  -2   5  10   10.30    1.40
   2   5  -9   10.00    0.80
   2   5  -9    9.60    0.70
   2   5  -9    9.70    1.20
   2   5  -9   13.10    2.70
  -2   5   9    9.70    1.20
   2   5  -8   12.00    0.80
   2   5  -8   11.60    0.80
   2   5  -8   12.20    0.90
   2   5  -8   13.30    2.30
  -2   5   8   11.70    0.50
  -2   5   8   11.80    0.50
  -2   5   8   13.90    1.60
   2   5  -7    1.30    0.50
   2   5  -7    0.70    0.50
   2   5  -7    1.10    0.50
   2   5  -7    0.90    2.90
  -2   5   7    0.90    0.20
  -2   5   7    0.50    0.90
   2  -5  -7    0.80    0.30
   2   5  -6    7.40    0.70
   2   5  -6    7.90    0.70
   2   5  -6    8.60    0.70
   2   5  -6    8.90    3.30
  -2   5   6    7.70    0.50
  -2   5   6    8.00    1.30
   2  -5  -6    7.90    0.50
   2   5  -5   44.20    1.80
   2   5  -5   42.70    1.90
   2   5  -5   39.40    3.10
  -2   5   5   45.40    1.90
  -2   5   5   45.10    3.00
  -2  -5   5   44.10    1.90
   2  -5  -5   45.50    2.30
   2   5  -4    0.70    0.40
   2   5  -4    1.50    0.40
   2   5  -4    1.90    1.30
  -2   5   4    1.00    0.40
  -2   5   4   -0.20    1.30
  -2  -5   4    0.80    0.40
   2  -5  -4    1.20    0.30
   2   5  -3    4.30    0.60
   2   5  -3    1.80    2.00
  -2   5   3    3.80    0.30
  -2  -5   3    3.90    0.70
   2  -5  -3    4.20    0.40
   2   5  -2  130.70    4.50
   2   5  -2  134.40    6.20
  -2   5   2  129.00    4.60
  -2  -5   2  128.50    4.50
   2  -5  -2  128.90    4.60
   2   5  -1   14.20    0.80
   2   5  -1   13.80    2.30
  -2   5   1   14.40    0.70
  -2  -5   1   14.20    0.70
   2  -5  -1   15.20    0.80
   2   5   0  109.00    3.90
   2   5   0  116.10    5.20
  -2   5   0  109.80    4.30
  -2  -5   0  110.00    4.10
   2  -5   0  109.40    4.10
   2   5   1 2326.30   73.10
   2   5   1 2447.30   80.60
  -2   5  -1 2293.80   73.50
  -2  -5  -1 2258.20   75.50
  -2  -5  -1 2460.30   80.00
   2  -5   1 2303.10   73.70
   2   5   2  120.40    4.40
   2   5   2  124.30    6.00
  -2   5  -2  122.30    4.70
  -2  -5  -2  120.70    5.60
  -2  -5  -2  134.90    8.00
   2  -5   2  123.20    4.90
   2   5   3  811.80   26.70
   2   5   3  834.40   31.30
  -2   5  -3  794.10   26.30
  -2  -5  -3  795.00   27.50
  -2  -5  -3  861.70   29.60
   2  -5   3  812.00   30.00
   2   5   4   85.20    3.30
   2   5   4   82.60    4.50
  -2   5  -4   86.20    3.40
  -2   5  -4   93.40    4.20
  -2  -5  -4   82.70    3.60
  -2  -5  -4   89.00    5.00
   2  -5   4   84.60    3.20
   2   5   5  120.90    4.70
   2   5   5  120.00    6.10
  -2   5  -5  116.60    4.60
  -2   5  -5  123.50    4.60
  -2  -5  -5  118.40    4.90
  -2  -5  -5  129.40    6.10
   2  -5   5  120.30    4.90
   2   5   6   16.10    0.80
   2   5   6   14.70    2.10
  -2   5  -6   16.50    1.00
  -2   5  -6   15.60    0.90
  -2  -5  -6   16.00    0.90
  -2  -5  -6   13.60    2.10
   2  -5   6   16.40    1.00
   2   5   7  519.60   18.20
   2   5   7  542.30   24.60
  -2   5  -7  519.10   18.40
  -2   5  -7  507.40   18.30
  -2   5  -7  577.60   22.50
  -2  -5  -7  521.20   18.80
   2  -5   7  539.30   18.20
   2   5   8    0.10    0.20
   2   5   8   -0.30    1.20
  -2   5  -8    0.80    0.80
  -2   5  -8    0.30    0.80
  -2   5  -8   -0.50    2.00
  -2  -5  -8    0.00    0.30
   2  -5   8   -0.50    0.60
   2   5   9   72.70    3.00
   2   5   9   72.60    3.70
   2   5   9   65.10    3.60
  -2   5  -9   75.70    3.60
  -2   5  -9   74.20    3.30
  -2   5  -9   81.80    5.30
  -2  -5  -9   74.60    3.10
   2  -5   9   70.30    2.90
   2   5  10    0.70    0.20
   2   5  10    0.80    0.30
   2   5  10    1.20    1.10
  -2   5 -10    0.60    0.60
  -2   5 -10   -0.40    0.90
  -2   5 -10    1.90    2.70
   2  -5  10    1.30    0.60
   2   5  11    0.90    1.10
  -2   5 -11    0.60    0.60
  -2   5 -11   -1.70    2.90
   2  -5  11    1.10    0.60
   2   5  12   38.20    2.40
  -2   5 -12   35.40    2.10
  -2   5 -12   44.20    4.30
   2   5  13    9.80    3.60
   2   5  14    9.20    1.70
   2   5  15    1.00    1.40
   2   5  16    1.60    1.80
  -2   6  16   28.20    3.00
  -2   6  15   18.30    2.70
  -2   6  14   31.80    2.60
   2   6 -13   14.70    0.90
  -2   6  13   10.90    1.60
   2   6 -12   70.00    3.40
   2   6 -12   74.10    3.70
   2   6 -12   75.60    5.30
  -2   6  12   75.90    4.10
   2   6 -11   25.40    1.40
   2   6 -11   24.50    1.40
   2   6 -11   22.10    3.30
  -2   6  11   25.40    2.00
   2   6 -10   15.00    1.30
   2   6 -10   14.20    1.00
   2   6 -10   13.80    3.00
  -2   6  10   13.70    1.30
   2   6  -9   15.80    1.10
   2   6  -9   16.90    1.10
   2   6  -9   16.00    1.30
   2   6  -9   15.70    3.20
   2   6  -8    3.30    0.60
   2   6  -8    2.70    0.60
   2   6  -8    1.90    0.80
   2   6  -8    2.90    2.60
  -2   6   8    2.90    0.30
  -2   6   8    2.70    0.30
  -2   6   8    3.30    1.10
   2   6  -7  224.50    8.00
   2   6  -7  228.70    8.80
   2   6  -7  210.00    8.00
   2   6  -7  231.40   10.90
  -2   6   7  220.70    7.90
  -2   6   7  230.80   10.20
   2  -6  -7  230.90    7.60
   2   6  -6   39.50    1.80
   2   6  -6   41.50    1.90
   2   6  -6   40.50    1.90
   2   6  -6   38.50    3.90
  -2   6   6   40.50    1.70
  -2   6   6   38.80    2.60
   2  -6  -6   40.80    1.80
   2   6  -5   91.50    3.80
   2   6  -5   99.40    4.00
   2   6  -5   99.20    5.40
  -2   6   5   87.10    3.30
  -2   6   5   98.40    4.20
  -2  -6   5   89.20    3.50
   2  -6  -5   91.00    3.30
   2   6  -4  233.90    8.30
   2   6  -4  256.10   10.80
  -2   6   4  226.70    7.90
  -2  -6   4  231.30    7.80
   2  -6  -4  228.70    7.70
   2   6  -3   42.50    1.80
   2   6  -3   41.20    3.00
  -2   6   3   42.00    1.70
  -2  -6   3   43.40    1.90
   2  -6  -3   43.50    1.80
   2   6  -2   28.20    1.20
   2   6  -2   27.60    3.00
  -2   6   2   29.70    2.50
  -2  -6   2   27.10    1.30
   2  -6  -2   28.90    1.20
   2   6  -1  341.20   11.40
   2   6  -1  364.30   13.30
  -2   6   1  340.40   12.40
  -2  -6   1  337.40   12.00
   2  -6  -1  342.30   11.60
   2   6   0    0.80    0.50
   2   6   0   -0.40    1.90
  -2   6   0    0.90    0.40
  -2  -6   0    1.20    0.40
   2  -6   0    0.20    0.50
   2   6   1  226.70    9.70
   2   6   1  233.90   10.80
  -2   6  -1  218.20    7.80
  -2  -6  -1  223.10    7.70
   2  -6   1  222.90    7.70
   2   6   2  256.20    8.70
   2   6   2  257.50   10.70
  -2   6  -2  251.60    9.00
  -2  -6  -2  250.60    9.00
   2  -6   2  254.30    8.80
   2   6   3   27.00    1.30
   2   6   3   28.60    2.50
  -2   6  -3   27.80    1.30
  -2  -6  -3   26.80    1.30
   2  -6   3   28.30    1.30
   2   6   4  383.50   13.30
   2   6   4  391.60   16.00
  -2   6  -4  371.30   13.10
  -2  -6  -4  379.40   13.60
   2  -6   4  391.30   13.10
   2   6   5   77.30    3.10
   2   6   5   77.80    4.50
  -2   6  -5   70.90    3.10
  -2   6  -5   75.10    3.00
  -2  -6  -5   75.20    3.10
   2  -6   5   79.40    3.90
   2   6   6  567.60   19.40
   2   6   6  565.40   21.90
  -2   6  -6  571.80   21.80
  -2   6  -6  546.80   18.80
  -2  -6  -6  550.80   19.00
   2  -6   6  568.30   18.80
   2   6   7   66.40    2.70
   2   6   7   62.70    3.60
  -2   6  -7   64.60    2.90
  -2   6  -7   70.20    2.80
  -2  -6  -7   68.70    3.00
   2  -6   7   64.10    2.60
   2   6   8  102.70    3.80
   2   6   8  108.50    5.30
  -2   6  -8   99.20    4.20
  -2   6  -8  102.10    4.10
  -2   6  -8  103.80    6.20
  -2  -6  -8  100.40    4.10
   2  -6   8  100.90    3.80
   2   6   9   98.90    3.80
   2   6   9   91.60    5.20
  -2   6  -9   92.00    4.10
  -2   6  -9  104.80    4.90
  -2   6  -9  110.60    6.10
  -2  -6  -9   95.10    4.00
   2  -6   9   91.30    3.60
   2   6  10   15.50    0.80
   2   6  10   15.70    0.80
   2   6  10   14.30    1.30
   2   6  10    9.50    1.30
  -2   6 -10   15.60    1.20
  -2   6 -10   11.40    1.40
  -2   6 -10   13.30    3.50
   2  -6  10   15.10    1.10
   2   6  11    1.10    0.80
  -2   6 -11    0.60    0.70
  -2   6 -11    3.90    3.50
   2  -6  11    1.00    0.40
   2   6  12    2.40    1.20
  -2   6 -12    2.10    0.80
  -2   6 -12    3.90    3.40
   2   6  13   42.20    3.60
   2   6  14    6.90    1.40
   2   6  15   55.50    3.70
   2   6  16    4.10    1.40
  -2   7  16   10.00    2.10
  -2   7  15    4.70    2.70
  -2   7  14    5.80    1.30
   2   7 -13   72.50    3.20
  -2   7  13   71.80    3.90
   2   7 -12    5.30    0.80
   2   7 -12    4.70    0.80
   2   7 -12    2.20    2.20
  -2   7  12    4.30    1.10
   2   7 -11    1.40    0.80
   2   7 -11    1.10    0.70
   2   7 -11   -1.00    3.10
  -2   7  11    0.40    0.90
   2   7 -10   51.40    2.40
   2   7 -10   76.70    6.80
   2   7 -10   51.80    4.60
   2   7  -9   15.30    0.90
   2   7  -9   16.00    0.90
   2   7  -9   12.50    1.20
   2   7  -9   15.50    4.30
  -2   7   9   15.40    0.70
  -2   7   9   15.80    0.70
  -2   7   9   11.60    1.20
  -2   7   9   14.70    1.20
   2   7  -8    9.20    0.90
   2   7  -8   11.30    0.80
   2   7  -8   11.40    3.00
   2   7  -8    7.40    2.20
  -2   7   8   10.20    0.60
  -2   7   8   10.10    0.60
  -2   7   8    6.30    1.30
   2   7  -7   16.20    1.00
   2   7  -7   17.20    1.20
   2   7  -7   19.20    1.10
   2   7  -7   11.40    3.10
  -2   7   7   17.30    0.90
  -2   7   7   16.00    2.10
   2  -7  -7   17.50    0.90
   2   7  -6   40.50    1.70
   2   7  -6   37.30    1.70
   2   7  -6   38.10    1.80
   2   7  -6   35.80    3.30
  -2   7   6   38.20    1.60
  -2   7   6   36.50    2.90
   2  -7  -6   39.10    1.60
   2   7  -5  100.30    4.00
   2   7  -5   98.20    4.40
   2   7  -5  122.10    6.80
  -2   7   5   98.20    3.60
   2  -7  -5  104.80    4.00
   2   7  -4   29.30    1.50
   2   7  -4   25.00    3.50
  -2   7   4   29.00    1.30
  -2  -7   4   29.10    1.50
   2  -7  -4   29.00    1.20
   2   7  -3   90.20    3.30
   2   7  -3   95.60    6.60
  -2   7   3   88.70    3.50
  -2  -7   3   89.10    3.20
   2  -7  -3   87.90    3.10
   2   7  -2  102.20    3.50
   2   7  -2  106.40    5.60
  -2   7   2   99.20    3.90
  -2  -7   2   98.30    3.60
   2  -7  -2  101.50    3.60
   2   7  -1   38.10    1.60
   2   7  -1   37.30    3.30
  -2   7   1   43.10    2.30
  -2  -7   1   37.00    1.60
   2  -7  -1   36.50    1.60
   2   7   0  178.20    6.20
   2   7   0  175.40    7.30
  -2   7   0  176.90    6.40
  -2  -7   0  177.20    6.80
   2  -7   0  173.60    6.10
   2   7   1  155.60    5.50
   2   7   1  157.50    7.30
  -2   7  -1  150.30    6.70
  -2  -7  -1  150.30    5.40
   2  -7   1  148.00    5.40
   2   7   2  226.00    7.90
   2   7   2  219.20    9.50
  -2   7  -2  213.60    7.60
  -2  -7  -2  214.30    7.40
   2  -7   2  217.00    8.40
   2   7   3   91.10    3.50
   2   7   3   93.70    4.90
  -2   7  -3   88.20    4.80
  -2  -7  -3   86.20    3.40
   2  -7   3   88.80    3.40
   2   7   4    7.30    1.20
   2   7   4    7.00    2.00
  -2   7  -4    7.40    0.80
  -2  -7  -4    8.20    0.70
   2  -7   4    7.00    0.70
   2   7   5    3.40    0.40
   2   7   5    3.30    1.50
  -2   7  -5    4.70    1.40
  -2   7  -5    2.90    0.50
  -2  -7  -5    2.80    0.50
   2  -7   5    2.30    0.70
   2   7   6   99.60    3.90
   2   7   6   93.30    5.20
  -2   7  -6   96.50    3.90
  -2   7  -6  104.30    4.00
  -2  -7  -6   98.90    3.90
   2  -7   6  103.50    3.80
   2   7   7  196.70    7.50
   2   7   7  194.60    8.70
  -2   7  -7  195.60    8.00
  -2   7  -7  196.10    7.50
  -2  -7  -7  194.20    7.30
   2  -7   7  191.20    6.90
   2   7   8   87.20    3.60
   2   7   8   88.00    4.70
  -2   7  -8   80.40    3.50
  -2   7  -8   88.80    3.70
  -2  -7  -8   85.80    3.70
   2  -7   8   86.30    3.30
   2   7   9   42.00    1.70
   2   7   9   42.80    1.80
   2   7   9   39.20    2.90
  -2   7  -9   39.60    2.20
  -2   7  -9   35.70    2.00
  -2   7  -9   40.90    4.10
   2  -7   9   40.00    1.80
   2   7  10  118.90    4.90
   2   7  10  121.70    4.50
   2   7  10  113.60    5.20
  -2   7 -10  115.50    4.90
  -2   7 -10  127.30    7.50
   2  -7  10  117.40    4.80
   2   7  11    8.90    1.60
  -2   7 -11   11.00    1.30
  -2   7 -11   12.30    3.90
   2  -7  11    8.10    0.90
   2   7  12   64.40    3.50
  -2   7 -12   60.60    2.70
  -2   7 -12   62.10    6.00
   2   7  13    8.30    2.50
   2   7  14   -0.10    1.30
   2   7  15    3.00    1.90
  -2   8  15   10.40    2.70
  -2   8  14   14.70    2.20
   2   8 -13    0.10    0.70
  -2   8  13    1.20    1.60
   2   8 -12   99.60    4.20
   2   8 -12   92.20    4.50
   2   8 -12  113.80    7.20
  -2   8  12  110.10    5.10
   2   8 -11    4.70    0.80
   2   8 -11    4.20    0.80
   2   8 -11    0.90    3.60
  -2   8  11    4.10    1.00
   2   8 -10    2.30    0.70
   2   8 -10    5.50    2.00
   2   8 -10    2.80    3.40
   2   8  -9   72.30    3.00
   2   8  -9   73.60    3.00
   2   8  -9   77.40    3.80
   2   8  -9   76.70    5.30
  -2   8   9   78.70    3.10
  -2   8   9   76.60    2.90
  -2   8   9   68.10    3.90
   2   8  -8    0.10    0.70
   2   8  -8    1.30    0.80
   2   8  -8    0.60    0.70
   2   8  -8    3.00    2.30
  -2   8   8    0.70    0.40
  -2   8   8    1.20    0.30
  -2   8   8    0.50    1.50
   2   8  -7   44.40    1.90
   2   8  -7   43.00    1.90
   2   8  -7   43.50    1.90
   2   8  -7   47.10    4.20
  -2   8   7   42.40    2.10
  -2   8   7   44.80    1.90
  -2   8   7   40.70    3.20
   2   8  -6   31.60    1.40
   2   8  -6   30.60    1.40
   2   8  -6   34.40    1.60
   2   8  -6   33.40    3.60
  -2   8   6   31.70    1.50
   2  -8  -6   32.10    1.40
   2   8  -5  169.80    6.30
   2   8  -5  170.40    6.10
  -2   8   5  176.50    6.40
   2  -8  -5  175.70    6.20
   2   8  -4   40.30    2.40
   2   8  -4   37.60    1.70
  -2  -8   4   37.50    1.60
   2  -8  -4   37.00    1.50
   2   8  -3   46.40    2.20
  -2   8   3   46.40    1.80
  -2  -8   3   46.20    2.20
   2  -8  -3   46.10    2.10
   2   8  -2   85.90    3.40
   2   8  -2   92.30    5.70
  -2   8   2   85.20    3.20
  -2  -8   2   86.20    3.20
   2  -8  -2   86.80    3.60
   2   8  -1    1.20    0.70
   2   8  -1   -0.30    1.60
  -2   8   1    1.00    0.60
  -2  -8   1    1.80    0.50
   2  -8  -1    1.80    0.70
   2   8   0  253.20    8.70
   2   8   0  261.50   11.20
  -2   8   0  251.60    8.70
  -2  -8   0  248.50    8.40
   2  -8   0  255.60    8.60
   2   8   1    8.80    0.80
   2   8   1    7.10    2.50
  -2   8  -1    8.10    0.90
  -2  -8  -1    7.90    0.60
   2  -8   1    7.60    0.90
   2   8   2  141.00    5.00
   2   8   2  142.40    6.80
  -2   8  -2  135.90    4.90
  -2  -8  -2  130.30    4.80
   2  -8   2  134.20    5.00
   2   8   3  210.60    8.10
   2   8   3  217.90   12.20
  -2   8  -3  204.90    7.40
  -2  -8  -3  198.90    7.10
   2  -8   3  205.60    7.30
   2   8   4  223.40    7.60
   2   8   4  223.40    9.90
  -2   8  -4  220.10    7.90
  -2  -8  -4  210.90    7.60
   2  -8   4  217.90    7.80
   2   8   5    2.10    0.60
   2   8   5    1.10    2.20
  -2   8  -5    1.70    0.80
  -2  -8  -5    1.90    0.60
   2  -8   5    1.70    0.60
   2   8   6  276.50    9.60
   2   8   6  264.10   12.50
  -2   8  -6  268.60   11.00
  -2   8  -6  262.10    9.70
  -2  -8  -6  256.00    9.20
   2  -8   6  266.60    9.40
   2   8   7    8.30    0.70
   2   8   7    4.20    2.10
  -2   8  -7    8.10    0.70
  -2   8  -7    6.40    0.70
  -2  -8  -7   10.20    1.50
   2  -8   7    8.90    1.00
   2   8   8  382.00   13.70
   2   8   8  362.20   16.10
  -2   8  -8  364.50   13.20
  -2   8  -8  366.40   13.30
  -2  -8  -8  364.80   13.40
   2  -8   8  361.10   12.90
   2   8   9   40.60    1.80
   2   8   9   39.60    1.80
   2   8   9   38.20    3.10
  -2   8  -9   43.20    3.00
  -2   8  -9   36.20    1.90
   2  -8   9   38.70    1.90
   2   8  10   51.10    2.10
   2   8  10   52.70    2.10
   2   8  10   40.60    3.00
  -2   8 -10   52.80    3.00
  -2   8 -10   62.00    6.30
   2  -8  10   48.90    2.70
   2   8  11    0.10    1.00
  -2   8 -11    0.30    0.60
  -2   8 -11    0.50    1.00
  -2   8 -11   -3.70    4.20
   2  -8  11    0.60    0.50
   2   8  12   30.80    2.30
  -2   8 -12   32.50    2.10
  -2   8 -12   36.10    5.40
   2   8  13   12.70    2.20
   2   8  14    0.60    1.80
   2   8  15   63.70    4.00
  -2   9  15   34.80    3.30
  -2   9  14    6.20    1.50
   2   9 -13    4.00    1.00
  -2   9  13    3.00    1.20
   2   9 -12    4.70    0.70
   2   9 -12    1.30    3.10
  -2   9  12    5.50    1.70
   2   9 -11   23.90    1.40
   2   9 -11   29.70    1.90
   2   9 -11   22.70    5.10
   2   9 -10    1.80    0.90
   2   9 -10    2.30    0.70
   2   9 -10   -0.20    3.70
  -2   9  10    4.80    0.70
  -2   9  10    1.60    0.30
  -2   9  10    0.40    1.00
  -2   9  10    1.40    1.10
   2   9  -9   16.10    1.10
   2   9  -9   18.00    1.90
   2   9  -9   10.30    4.30
  -2   9   9   15.90    0.80
  -2   9   9   16.00    0.90
  -2   9   9   11.60    1.90
   2   9  -8   19.00    1.10
   2   9  -8   18.50    1.20
   2   9  -8   18.70    1.50
   2   9  -8   15.30    3.30
  -2   9   8   17.60    1.10
  -2   9   8   25.30    2.00
  -2   9   8   12.40    2.30
   2   9  -7   36.60    1.70
   2   9  -7   38.30    1.90
   2   9  -7   38.20    4.00
   2   9  -7   30.60    4.20
  -2   9   7   38.90    1.90
  -2   9   7   38.00    1.70
   2   9  -6  451.60   15.10
   2   9  -6  435.10   15.40
   2   9  -6  437.00   16.50
  -2   9   6  468.50   15.10
   2  -9  -6  439.70   14.50
   2   9  -5   11.30    0.80
   2   9  -5   12.70    0.90
  -2   9   5   12.50    0.70
   2  -9  -5   12.60    0.70
   2   9  -4  127.20    4.50
   2   9  -4  127.30    5.00
  -2   9   4  128.30    4.40
   2  -9  -4  125.20    4.40
   2   9  -3   -0.20    0.50
   2   9  -3    0.20    0.50
  -2   9   3    0.20    0.40
  -2  -9   3    0.20    0.50
   2  -9  -3    0.40    0.60
   2   9  -2  406.30   12.90
  -2   9   2  385.90   12.80
  -2  -9   2  375.90   12.80
   2  -9  -2  392.20   13.90
   2   9  -1   61.70    2.40
   2   9  -1   56.20    4.40
  -2   9   1   61.30    3.00
  -2  -9   1   56.80    2.30
   2  -9  -1   59.70    2.40
   2   9   0   85.40    3.10
   2   9   0   81.00    4.90
  -2   9   0   80.10    3.30
  -2  -9   0   82.50    3.00
   2  -9   0   82.20    3.10
   2   9   1    1.40    0.70
   2   9   1    0.20    2.40
  -2   9  -1    1.80    0.80
  -2  -9  -1    1.20    0.80
   2  -9   1    1.60    0.80
   2   9   2   70.30    2.70
   2   9   2   75.50    4.80
  -2   9  -2   67.20    2.90
  -2  -9  -2   68.10    2.60
   2  -9   2   74.20    3.20
   2   9   3   78.60    3.00
   2   9   3   77.70    5.00
  -2   9  -3   79.40    4.50
  -2  -9  -3   72.60    2.80
   2  -9   3   77.00    3.00
   2   9   4   43.30    2.50
   2   9   4   35.20    4.20
  -2   9  -4   41.30    2.00
  -2  -9  -4   41.10    1.90
   2  -9   4   42.70    3.00
   2   9   5  267.50    9.80
   2   9   5  269.10   14.40
  -2   9  -5  264.90   10.40
  -2  -9  -5  255.40    8.90
   2  -9   5  272.40    9.80
   2   9   6    1.70    0.60
   2   9   6    0.00    1.60
  -2   9  -6    2.70    0.90
  -2   9  -6    2.30    0.60
  -2  -9  -6    2.10    0.60
   2  -9   6    2.40    1.20
   2   9   7   14.50    0.90
   2   9   7    8.40    2.60
  -2   9  -7   14.70    1.10
  -2   9  -7   15.40    1.50
  -2  -9  -7   15.40    1.10
   2  -9   7   13.80    1.20
   2   9   8   67.80    3.00
   2   9   8   66.70    2.60
   2   9   8   59.80    4.50
  -2   9  -8   67.20    3.80
  -2   9  -8   69.80    3.00
   2  -9   8   62.10    2.80
   2   9   9   21.30    1.10
   2   9   9   23.80    1.30
   2   9   9   14.70    2.70
  -2   9  -9   20.30    1.50
  -2   9  -9   20.50    1.50
   2  -9   9   22.30    1.80
   2   9  10    2.80    0.50
   2   9  10    2.50    1.20
   2   9  10    0.50    1.80
  -2   9 -10    3.30    1.00
  -2   9 -10    1.60    3.80
   2  -9  10    1.80    0.90
  -2   9 -11    1.70    1.20
  -2   9 -11   11.90    3.70
  -2   9 -11    2.50    4.90
   2   9  12   63.60    6.10
  -2   9 -12   55.60    2.70
  -2   9 -12   58.50    7.30
   2   9  13   26.20    2.20
  -2   9 -13   23.70    1.60
   2   9  14   87.30    5.00
   2   9  15    1.20    2.30
  -2  10  15   10.40    2.40
  -2  10  14    3.00    1.80
   2  10 -13    0.00    0.60
  -2  10  13    1.00    1.20
   2  10 -12   22.30    1.50
   2  10 -12   20.20    4.10
   2  10 -11   10.40    1.30
   2  10 -11   12.90    1.50
   2  10 -11    7.30    4.90
   2  10 -10   99.40    4.10
   2  10 -10   95.80    4.20
   2  10 -10   99.70    7.50
  -2  10  10  104.80    4.50
  -2  10  10  104.90    3.90
  -2  10  10   86.20    4.80
  -2  10  10   95.20    5.10
   2  10  -9  121.90    5.00
   2  10  -9  115.20    4.90
   2  10  -9  137.50    9.00
  -2  10   9  122.40    4.80
  -2  10   9  120.20    4.60
  -2  10   9  109.80    6.00
   2  10  -8  133.50    7.00
   2  10  -8  138.20    6.40
   2  10  -8  126.90    5.20
   2  10  -8  135.20    8.90
  -2  10   8  134.50    5.20
  -2  10   8  126.60    6.70
   2  10  -7   30.80    1.90
   2  10  -7   34.10    2.30
   2  10  -7   32.70    1.90
  -2  10   7   31.10    1.60
  -2  10   7   33.40    1.50
   2  10  -6   48.70    2.10
   2  10  -6   47.30    2.30
  -2  10   6   48.00    1.90
   2 -10  -6   49.20    2.00
   2  10  -5   26.10    1.60
   2  10  -5   27.70    1.50
  -2  10   5   26.00    1.30
   2 -10  -5   26.00    1.60
   2  10  -4   -0.60    0.90
   2  10  -4   -0.10    0.80
  -2  10   4   -0.20    0.60
   2 -10  -4   -0.30    0.70
   2  10  -3  107.40    4.30
   2  10  -3  103.40    4.20
  -2  10   3  104.00    3.80
   2 -10  -3  108.90    3.80
   2  10  -2   16.70    1.10
   2  10  -2   17.20    2.10
  -2  10   2   16.30    1.10
  -2 -10   2   17.10    1.00
   2 -10  -2   15.90    0.90
   2  10  -1   69.80    3.30
  -2  10   1   63.90    2.70
  -2 -10   1   64.30    3.10
   2 -10  -1   69.70    3.30
   2  10   0   73.20    2.90
   2  10   0   75.10    5.70
  -2  10   0   72.30    2.80
  -2 -10   0   73.90    3.70
   2 -10   0   73.40    2.70
   2  10   1    6.90    1.10
   2  10   1    5.90    3.00
  -2  10  -1    6.50    0.80
  -2 -10  -1    6.10    0.60
   2 -10   1    6.60    0.70
   2  10   2    3.30    1.30
   2  10   2    2.50    2.00
  -2  10  -2    0.40    0.90
  -2 -10  -2    1.10    0.40
   2 -10   2    1.30    0.60
   2  10   3   61.00    2.50
   2  10   3   61.00    4.10
  -2  10  -3   62.60    2.70
  -2 -10  -3   59.20    2.40
   2 -10   3   64.70    2.80
   2  10   4    9.40    0.80
   2  10   4    4.40    3.00
  -2  10  -4    9.40    1.10
  -2 -10  -4    9.20    1.10
   2 -10   4    9.40    1.00
   2  10   5   33.40    1.60
   2  10   5   31.20    3.20
  -2  10  -5   32.50    1.90
  -2 -10  -5   32.20    1.40
   2 -10   5   31.70    1.50
   2  10   6   23.00    1.30
   2  10   6   23.20    1.30
   2  10   6   19.70    2.90
  -2  10  -6   23.20    2.20
  -2  10  -6   23.30    1.40
  -2 -10  -6   23.70    1.30
   2 -10   6   22.60    1.30
   2  10   7   12.50    1.10
   2  10   7   11.20    1.00
   2  10   7    7.70    2.80
  -2  10  -7   11.80    1.10
  -2  10  -7   11.70    1.00
   2 -10   7   10.70    0.80
   2  10   8  114.80    4.30
   2  10   8  118.90    4.40
   2  10   8  105.00    5.80
  -2  10  -8  121.70    5.60
  -2  10  -8  106.30    4.20
   2 -10   8  106.20    4.30
   2  10   9   35.20    3.50
   2  10   9   26.90    1.30
   2  10   9   19.10    2.80
  -2  10  -9   25.60    1.80
   2 -10   9   25.40    1.70
   2  10  10   88.00    3.80
   2  10  10   83.20    4.00
   2  10  10   73.90    5.00
  -2  10 -10   74.60    3.70
   2 -10  10   83.70    3.70
  -2  10 -11    5.00    0.90
  -2  10 -11    4.20    1.30
  -2  10 -11    7.10    3.70
   2  10  12   71.60    3.60
  -2  10 -12   66.10    3.30
  -2  10 -12   61.10    6.70
   2  10  13   45.50    3.10
  -2  10 -13   48.60    2.90
   2  10  14    4.80    2.00
  -2  11  15    2.20    1.50
  -2  11  14    1.30    1.40
   2  11 -13    4.80    1.20
  -2  11  13    8.00    2.10
   2  11 -12    0.00    1.20
   2  11 -12   -2.10    4.90
   2  11 -11  118.30    5.70
   2  11 -11  127.70    6.20
   2  11 -11  108.20    8.80
   2  11 -10    6.30    1.00
   2  11 -10    9.40    2.30
   2  11 -10   39.50   11.60
  -2  11  10    5.00    0.60
  -2  11  10    3.00    2.00
  -2  11  10    5.20    2.10
   2  11  -9   70.40    3.00
   2  11  -9   65.00    3.10
   2  11  -9   75.70    7.10
  -2  11   9   74.90    3.20
  -2  11   9   77.30    3.00
  -2  11   9   65.40    4.40
   2  11  -8    6.50    0.90
   2  11  -8    6.30    0.90
   2  11  -8    5.50    3.30
  -2  11   8    6.60    0.70
  -2  11   8    7.30    0.70
   2  11  -7   24.70    1.60
   2  11  -7   22.50    1.50
   2  11  -7   28.30    1.90
  -2  11   7   23.90    1.30
  -2  11   7   23.60    1.20
   2  11  -6  173.40    6.20
   2  11  -6  184.70    8.40
  -2  11   6  173.90    6.50
  -2  11   6  181.30    6.50
   2 -11  -6  174.00    6.10
   2  11  -5   51.90    2.30
   2  11  -5   52.20    2.30
  -2  11   5   51.60    2.10
   2 -11  -5   52.30    2.10
   2  11  -4   86.30    3.30
   2  11  -4   84.20    3.60
  -2  11   4   88.90    3.60
   2 -11  -4   85.80    3.20
   2  11  -3  117.30    4.20
   2  11  -3  117.10    6.20
  -2  11   3  115.60    4.90
   2 -11  -3  116.70    4.10
   2  11  -2   71.20    3.20
   2  11  -2   73.50    4.20
  -2  11   2   75.30    2.90
   2 -11  -2   73.10    2.80
   2  11  -1  575.00   18.20
   2  11  -1  545.10   18.50
  -2  11   1  563.90   21.60
   2 -11  -1  559.60   18.10
   2  11   0    0.60    0.60
   2  11   0    1.50    0.60
   2  11   0    0.70    2.30
  -2  11   0    1.40    0.90
  -2 -11   0    0.90    0.80
   2 -11   0    0.70    1.10
   2  11   1   40.30    1.70
   2  11   1   37.20    1.70
   2  11   1   39.50    4.00
  -2  11  -1   40.60    2.60
  -2 -11  -1   36.00    1.60
   2 -11   1   40.70    2.20
   2  11   2   11.30    1.10
   2  11   2    7.10    3.30
  -2  11  -2   11.60    0.90
  -2 -11  -2    9.60    1.00
   2 -11   2   11.10    1.30
   2  11   3  109.40    4.00
   2  11   3  102.40    3.80
   2  11   3  112.40    6.40
  -2  11  -3  101.30    5.00
  -2 -11  -3  101.20    3.90
   2 -11   3  102.60    4.40
   2  11   4    4.00    0.60
   2  11   4    3.90    0.70
   2  11   4   -0.30    3.20
  -2  11  -4    3.50    0.70
  -2 -11  -4    3.00    0.60
   2 -11   4    3.60    0.80
   2  11   5  103.10    4.20
   2  11   5   99.20    4.10
   2  11   5   87.80    6.70
  -2  11  -5   98.30    4.60
   2 -11   5   99.90    3.90
   2  11   6    4.80    0.80
   2  11   6    4.10    0.80
   2  11   6    1.50    3.30
  -2  11  -6    4.30    0.80
   2 -11   6    4.70    0.80
   2  11   7    2.50    1.00
   2  11   7    2.50    0.80
   2  11   7    2.10    2.90
  -2  11  -7    2.10    1.10
  -2  11  -7    2.00    0.70
   2 -11   7    2.20    0.80
   2  11   8   21.80    1.40
   2  11   8   21.80    1.20
   2  11   8   11.50    3.60
  -2  11  -8   20.70    1.50
  -2  11  -8   20.80    1.60
   2 -11   8   20.60    1.50
   2  11   9   45.60    2.20
   2  11   9   46.60    2.10
   2  11   9   33.90    3.90
  -2  11  -9   48.70    2.80
   2 -11   9   49.30    2.70
   2  11  10   10.50    0.80
   2  11  10    6.50    2.50
  -2  11 -10    8.60    1.00
  -2  11 -10    9.30    1.20
   2 -11  10    8.80    1.00
  -2  11 -11   45.20    2.30
  -2  11 -11   60.40   11.70
  -2  11 -12    9.20    1.70
  -2  11 -12    7.00    4.50
   2  11  13    2.80    1.50
  -2  11 -13    4.50    1.40
   2  11  14   55.50    3.60
  -2  12  14    1.30    1.50
   2  12 -13    3.00    1.40
   2  12 -12    1.30    1.10
   2  12 -12   -0.60    5.60
   2  12 -11   13.20    1.20
   2  12 -11   14.20    1.80
   2  12 -11   14.50    6.50
   2  12 -10    2.90    0.80
   2  12 -10    3.20    1.30
   2  12 -10    4.60    4.00
  -2  12  10    2.40    0.60
  -2  12  10    0.10    2.10
  -2  12  10    1.40    2.10
   2  12  -9  131.50    5.20
   2  12  -9  147.90    6.60
   2  12  -9  135.30    9.70
  -2  12   9  137.00    5.60
  -2  12   9  151.60    5.40
  -2  12   9  135.60    8.00
   2  12  -8   17.80    1.20
   2  12  -8   20.50    1.80
   2  12  -8   19.30    4.20
  -2  12   8   17.40    1.20
  -2  12   8   19.60    1.20
   2  12  -7  226.50    7.90
   2  12  -7  220.60    8.90
  -2  12   7  223.50    8.30
  -2  12   7  232.00    7.60
   2  12  -6    2.70    1.10
   2  12  -6    1.60    1.00
  -2  12   6    0.60    0.70
  -2  12   6    2.20    0.50
   2  12  -5  249.60    8.50
   2  12  -5  255.20    9.40
  -2  12   5  257.50    8.80
   2 -12  -5  242.10    8.50
   2  12  -4   88.00    3.30
   2  12  -4   88.50    3.70
  -2  12   4   92.30    3.30
   2 -12  -4   92.10    3.80
   2  12  -3   31.10    1.70
   2  12  -3   34.00    1.90
  -2  12   3   32.80    1.50
   2 -12  -3   32.10    1.50
   2  12  -2  135.10    5.10
   2  12  -2  122.90    4.70
  -2  12   2  129.00    5.10
   2 -12  -2  128.80    4.70
   2  12  -1   43.40    2.00
   2  12  -1   44.90    2.10
  -2  12   1   42.90    2.00
   2 -12  -1   46.30    2.50
   2  12   0   -0.70    1.00
   2  12   0   -0.20    0.80
   2  12   0    1.90    2.60
  -2  12   0    0.30    0.60
   2 -12   0    0.80    0.90
   2  12   1    9.00    1.00
   2  12   1    8.30    0.80
   2  12   1    3.20    2.50
  -2  12  -1    9.60    1.80
   2 -12   1    9.20    0.80
   2  12   2    3.40    0.60
   2  12   2    3.40    0.70
   2  12   2   -0.50    2.20
  -2  12  -2    3.80    1.00
   2 -12   2    5.70    1.50
   2  12   3   38.70    2.20
   2  12   3   35.80    1.80
   2  12   3   29.10    4.60
  -2  12  -3   38.50    1.80
   2 -12   3   38.10    1.90
   2  12   4    1.10    0.80
   2  12   4    1.60    0.80
   2  12   4   -0.30    3.40
  -2  12  -4    1.80    0.80
   2 -12   4    1.30    1.00
   2  12   5    5.00    0.90
   2  12   5    5.10    0.90
   2  12   5    2.30    3.40
  -2  12  -5    6.10    1.20
   2 -12   5    5.00    0.90
   2  12   6    6.70    0.90
   2  12   6    6.80    1.00
   2  12   6    7.30    4.20
  -2  12  -6    7.20    1.10
   2 -12   6    6.80    1.00
   2  12   7    0.90    0.60
   2  12   7    0.90    0.70
   2  12   7    1.00    3.10
  -2  12  -7    0.60    0.80
  -2  12  -7   -0.20    0.60
   2 -12   7   -0.10    0.70
   2  12   8    8.80    0.80
   2  12   8    9.60    1.00
   2  12   8    7.00    3.00
  -2  12  -8    6.90    1.30
   2 -12   8    8.70    1.00
   2  12   9   21.80    1.30
   2  12   9   23.90    1.80
   2  12   9   13.00    3.60
  -2  12  -9   17.20    2.10
   2 -12   9   21.00    1.50
   2  12  10    0.40    0.50
  -2  12 -10    0.20    1.90
  -2  12 -11   43.90    2.60
  -2  12 -12    9.20    1.20
  -2  12 -12   11.30    4.80
   2  12  13  127.80    6.10
  -2  12 -13  113.10    5.60
   2  12  14    3.80    1.50
  -2  13  14   14.10    3.90
   2  13 -13   27.50    1.90
   2  13 -12   30.70    2.50
   2  13 -12   19.30    7.10
   2  13 -11   45.90    2.30
   2  13 -11   44.70    6.10
   2  13 -10    6.70    1.30
   2  13 -10    4.40    5.80
  -2  13  10    5.10    0.90
  -2  13  10   -0.10    3.10
   2  13  -9  180.30    7.10
   2  13  -9  193.00   12.90
  -2  13   9  188.80    7.40
  -2  13   9  189.70    6.80
  -2  13   9  176.70   10.10
  -2  13   9  176.70   10.10
   2  13  -8   40.50    2.20
   2  13  -8   36.90    2.40
   2  13  -8   39.60    5.10
  -2  13   8   41.40    2.20
  -2  13   8   40.80    1.90
   2  13  -7   27.00    1.50
   2  13  -7   27.00    2.00
  -2  13   7   27.70    1.60
  -2  13   7   26.30    1.60
   2  13  -6   42.30    2.60
   2  13  -6   39.70    2.30
  -2  13   6   38.40    1.90
  -2  13   6   41.10    2.20
   2  13  -5   55.90    2.50
   2  13  -5   57.90    2.70
  -2  13   5   57.80    2.50
  -2  13   5   57.80    2.40
   2 -13  -5   61.30    2.40
   2  13  -4   98.60    3.80
   2  13  -4   95.90    4.00
  -2  13   4   97.00    3.80
   2 -13  -4   98.30    3.70
   2  13  -3    4.40    0.90
   2  13  -3    4.30    1.00
  -2  13   3    3.60    0.80
   2 -13  -3    4.60    1.00
   2  13  -2   37.40    2.10
   2  13  -2   38.20    1.90
  -2  13   2   39.20    2.60
   2 -13  -2   40.90    2.10
   2  13  -1   67.60    2.70
   2  13  -1   67.80    2.80
  -2  13   1   66.30    2.80
   2 -13  -1   70.20    2.80
   2  13   0    9.00    1.20
   2  13   0   11.20    1.00
  -2  13   0   12.30    1.00
   2 -13   0   12.50    1.20
   2  13   1   35.70    2.50
   2  13   1   33.60    2.20
   2  13   1   33.40    5.10
  -2  13  -1   36.70    1.90
   2 -13   1   36.50    1.80
   2  13   2    5.50    0.90
   2  13   2    6.80    1.70
   2  13   2    6.70    3.10
  -2  13  -2    6.40    1.30
   2 -13   2    6.20    0.90
   2  13   3    6.20    0.90
   2  13   3    5.80    1.10
   2  13   3    7.70    4.20
  -2  13  -3    5.90    1.10
   2 -13   3    5.40    1.10
   2  13   4    6.40    0.80
   2  13   4    7.10    0.90
   2  13   4    1.10    2.90
  -2  13  -4    5.20    1.20
   2 -13   4    8.60    1.10
   2  13   5  252.00    8.90
   2  13   5  251.90    9.20
   2  13   5  244.00   13.80
  -2  13  -5  265.00   11.70
   2 -13   5  241.90    9.00
   2  13   6   12.70    1.30
   2  13   6   11.50    1.10
   2  13   6    4.70    3.90
  -2  13  -6   11.20    1.70
   2 -13   6    9.60    1.10
   2  13   7   20.90    1.50
   2  13   7   21.60    1.20
   2  13   7   11.10    3.80
   2 -13   7   19.70    1.50
   2  13   8   16.10    1.30
   2  13   8   16.70    1.30
   2  13   8    6.70    3.90
   2 -13   8   14.80    1.40
   2  13   9    3.00    0.70
   2  13   9   -0.10    3.10
  -2  13  -9    3.30    1.20
   2 -13   9    2.30    0.90
   2  13  10   14.60    1.40
  -2  13 -10   14.90    1.50
  -2  13 -11   48.60    2.60
  -2  13 -12   12.90    1.80
  -2  13 -12   -0.20    7.60
  -2  13 -13    6.30    1.70
   2  13  14   30.40    2.60
   2  14 -13   11.60    1.70
   2  14 -12    3.40    1.20
   2  14 -12   -1.40    4.80
   2  14 -11   23.50    2.20
   2  14 -11   23.80    7.40
   2  14 -10   59.90    3.20
   2  14 -10   62.40    8.50
  -2  14  10   58.60    2.70
   2  14  -9  121.10    5.20
   2  14  -9  117.70   10.40
  -2  14   9  128.00    5.60
   2  14  -8   13.60    1.60
   2  14  -8   12.50    4.60
  -2  14   8   13.90    1.00
  -2  14   8   14.10    1.10
   2  14  -7   58.30    2.70
  -2  14   7   63.10    3.20
  -2  14   7   60.80    2.40
   2  14  -6   24.60    1.80
  -2  14   6   25.60    1.40
  -2  14   6   23.90    1.30
   2  14  -5   20.30    1.40
   2  14  -5   18.90    1.70
  -2  14   5   20.90    1.20
  -2  14   5   20.70    1.40
   2  14  -4   -1.20    0.80
   2  14  -4    0.00    1.30
  -2  14   4   -0.60    0.70
  -2  14   4   -1.10    0.90
   2 -14  -4   -0.20    0.90
   2  14  -3  184.30    6.50
   2  14  -3  175.40    7.40
  -2  14   3  186.90    6.90
   2 -14  -3  192.00    7.50
   2  14  -2  118.00    5.10
   2  14  -2  115.70    4.60
  -2  14   2  122.40    4.50
   2 -14  -2  116.30    4.40
   2  14  -1   40.90    1.90
   2  14  -1   43.70    2.80
  -2  14   1   43.20    2.30
   2 -14  -1   41.10    2.00
   2  14   0   94.30    4.20
   2  14   0   91.70    3.70
  -2  14   0   90.60    3.60
   2 -14   0   95.90    4.50
   2  14   1   29.20    1.90
   2  14   1   30.50    1.60
   2  14   1   24.90    5.10
  -2  14  -1   29.90    1.60
   2 -14   1   29.60    1.90
   2  14   2   -0.60    0.90
   2  14   2   -0.20    0.70
   2  14   2   -0.80    4.30
  -2  14  -2    0.20    1.10
   2 -14   2   -0.80    1.10
   2  14   3   22.10    1.30
   2  14   3   20.90    1.50
   2  14   3   17.60    5.90
  -2  14  -3   22.00    1.50
   2 -14   3   25.00    2.00
   2  14   4    3.10    1.00
   2  14   4    4.30    1.20
   2  14   4    3.40    4.20
  -2  14  -4    1.10    1.30
   2 -14   4    2.70    0.80
   2  14   5   -1.60    0.90
   2  14   5    1.10    0.90
   2  14   5   -6.20    3.90
   2 -14   5    1.00    1.40
   2  14   6    3.30    1.00
   2  14   6    5.00    2.10
   2  14   6   -3.10    2.90
   2 -14   6    3.80    1.00
   2  14   7   45.40    2.40
   2  14   7   41.20    2.10
   2  14   7   32.60    5.20
   2 -14   7   43.00    2.20
   2  14   8    0.80    0.80
   2  14   8    0.30    0.60
   2  14   8    0.90    3.90
  -2  14  -8    0.70    0.80
   2 -14   8    0.60    1.20
   2  14   9    0.50    0.50
   2  14   9    3.80    3.50
  -2  14  -9    0.80    1.30
  -2  14 -10   27.80    1.80
  -2  14 -11   27.30    2.50
  -2  14 -12    7.50    1.30
  -2  14 -12    2.70    6.00
  -2  14 -13   25.60    1.90
   2  15 -13   32.20    2.40
   2  15 -12    0.60    1.10
   2  15 -12    5.70    6.40
   2  15 -11   16.00    1.90
   2  15 -11    8.80    7.30
   2  15 -10   18.40    1.90
   2  15 -10   15.60    7.20
  -2  15  10   17.70    1.40
   2  15  -9    0.20    2.10
   2  15  -9   10.70    7.20
  -2  15   9   -0.30    0.80
   2  15  -8   67.70    3.10
   2  15  -8   57.80    7.30
  -2  15   8   71.40    3.10
  -2  15   8   74.30    3.10
   2  15  -7   11.90    1.20
  -2  15   7   12.90    1.00
  -2  15   7   10.60    1.20
   2  15  -6   25.80    1.80
  -2  15   6   25.30    1.50
  -2  15   6   26.50    1.60
   2  15  -5   42.40    2.40
  -2  15   5   40.90    2.00
  -2  15   5   44.10    2.10
   2  15  -4  201.30    7.20
  -2  15   4  200.00    7.00
  -2  15   4  207.00    7.30
   2  15  -3   34.40    2.20
  -2  15   3   37.80    1.90
   2 -15  -3   38.70    2.30
   2  15  -2   68.50    3.30
   2  15  -2   68.30    3.20
  -2  15   2   73.00    3.60
   2 -15  -2   71.00    3.00
   2  15  -1    5.50    0.90
   2  15  -1    3.60    1.20
  -2  15   1    6.00    1.10
   2 -15  -1    4.30    0.90
   2  15   0  113.60    4.20
   2  15   0  110.00    4.30
  -2  15   0  109.50    4.50
   2 -15   0  110.70    4.30
   2  15   1   20.90    1.80
   2  15   1   21.10    1.50
   2  15   1   16.60    5.30
  -2  15  -1   19.70    1.40
   2 -15   1   22.00    1.90
   2  15   2   76.60    4.30
   2  15   2   75.60    3.10
   2  15   2   56.90    6.40
   2 -15   2   78.60    3.50
   2  15   3   45.80    2.10
   2  15   3   47.30    2.20
   2  15   3   41.90    5.00
   2 -15   3   51.80    2.90
   2  15   4   10.10    1.20
   2  15   4    7.40    1.60
   2  15   4   10.10    5.20
   2 -15   4    9.30    1.10
   2  15   5  127.00    5.00
   2  15   5  120.80    5.20
   2  15   5  115.00    8.00
   2 -15   5  122.20    5.20
   2  15   6   23.80    1.70
   2  15   6   24.30    1.50
   2  15   6   16.80    5.00
   2 -15   6   22.80    1.60
   2  15   7    9.00    1.20
   2  15   7    8.60    1.20
   2  15   7    1.00    4.50
   2 -15   7    6.70    1.50
   2  15   8   -0.20    0.80
   2  15   8    0.30    0.70
   2  15   8   -3.00    3.90
  -2  15  -8    1.90    1.50
   2  15   9    3.50    1.00
   2  15   9   -3.10    2.50
  -2  15  -9    5.30    1.50
  -2  15 -10   13.30    1.60
  -2  15 -11   -0.40    1.00
  -2  15 -12   24.20    2.40
  -2  15 -13   31.60    4.60
   2  16 -13    7.70    1.60
   2  16 -12   78.40    4.80
   2  16 -11    4.30    1.60
   2  16 -11    4.00    7.00
   2  16 -10   33.60    2.40
   2  16 -10   25.70    8.40
   2  16  -9   13.90    1.80
   2  16  -9   13.40    7.60
  -2  16   9   15.50    1.30
   2  16  -8   17.10    1.60
   2  16  -8    0.60    5.90
  -2  16   8   15.00    1.20
   2  16  -7    2.90    1.60
  -2  16   7    2.20    0.90
  -2  16   7   -0.10    1.10
   2  16  -6    0.20    1.00
  -2  16   6    0.90    1.10
  -2  16   6    1.10    0.80
   2  16  -5    0.50    1.20
  -2  16   5    0.20    0.70
  -2  16   5   -0.90    1.50
   2  16  -4   93.60    4.40
  -2  16   4   97.90    3.70
  -2  16   4   96.90    4.00
   2  16  -3   43.80    2.70
  -2  16   3   45.20    2.30
  -2  16   3   44.10    2.30
   2  16  -2    1.40    0.90
  -2  16   2    1.50    0.90
  -2  16   2    0.50    1.30
   2 -16  -2    0.90    0.80
   2  16  -1    9.50    1.10
   2 -16  -1   10.40    1.10
   2  16   0    2.90    1.80
   2  16   0    3.40    3.80
   2 -16   0    2.80    1.00
   2  16   1   34.50    2.50
   2  16   1   32.90    6.30
   2 -16   1   33.60    2.50
   2  16   2   27.10    2.00
   2  16   2   24.20    1.90
   2  16   2   15.60    5.70
   2 -16   2   29.40    2.30
   2  16   3   73.90    3.10
   2  16   3   71.60    3.40
   2  16   3   62.50    6.40
   2 -16   3   74.10    3.70
   2  16   4    6.20    0.90
   2  16   4    5.30    1.10
   2  16   4    2.30    5.60
   2 -16   4    6.20    1.00
   2  16   5    9.00    1.10
   2  16   5    8.50    1.50
   2  16   5    3.00    3.70
   2 -16   5    9.00    1.30
   2  16   6  190.60    7.50
   2  16   6  206.10    8.10
   2  16   6  172.10   10.10
  -2  16  -6  186.30    7.40
   2 -16   6  185.90    7.30
   2  16   7   23.70    1.70
   2  16   7   26.30    2.00
   2  16   7   14.20    5.40
  -2  16  -7   27.50    2.30
   2  16   8    9.30    1.00
   2  16   8    1.50    3.30
  -2  16  -8   10.00    1.70
   2  16   9    7.30    0.90
  -2  16  -9    7.70    2.50
  -2  16 -10   16.90    2.20
  -2  16 -11   10.50    4.80
  -2  16 -12    0.70    1.30
   2  17 -13    6.50    1.40
   2  17 -12    4.80    1.80
   2  17 -11   30.80    8.00
   2  17 -10   30.50    2.90
   2  17  -9    8.50    2.30
   2  17  -9    7.00    5.80
  -2  17   9    6.10    1.10
   2  17  -8   68.10    3.60
   2  17  -8   59.20    8.60
  -2  17   8   74.30    3.20
   2  17  -7   15.10    2.10
  -2  17   7   16.80    1.80
  -2  17   7   11.30    1.70
   2  17  -6   14.60    1.50
  -2  17   6   15.60    1.50
  -2  17   6   13.10    1.50
   2  17  -5    0.10    1.00
  -2  17   5   -0.30    0.70
   2  17  -4   18.40    1.80
  -2  17   4   20.50    1.80
   2  17  -3   25.00    1.80
  -2  17   3   23.90    1.80
   2  17  -2  186.70    6.70
  -2  17   2  177.80    6.70
   2  17  -1   25.00    2.10
  -2  17   1   23.70    1.50
   2 -17  -1   23.10    1.60
   2  17   0   90.70    3.60
   2  17   0   73.30    7.20
  -2  17   0   91.50    3.60
   2 -17   0  125.90   15.10
   2  17   1    5.80    1.40
   2  17   1    2.10    4.20
   2 -17   1    6.90    1.90
   2  17   2    8.00    1.40
   2  17   2    5.70    5.60
   2 -17   2   10.40    1.80
   2  17   3   29.20    1.70
   2  17   3   21.40    4.30
   2 -17   3   27.80    2.30
   2  17   4    0.50    0.80
   2  17   4    3.70    5.70
  -2  17  -4    0.70    1.00
   2 -17   4    1.00    1.00
   2  17   5   14.20    1.20
   2  17   5    6.00    4.20
  -2  17  -5   16.50    1.50
   2 -17   5   14.40    2.20
   2  17   6   75.00    3.40
   2  17   6   53.80    6.90
  -2  17  -6   74.70    3.60
   2  17   7   29.90    2.10
   2  17   7   12.20    4.90
  -2  17  -7   32.10    2.30
   2  17   8   48.30    2.60
   2  17   8   17.10    6.50
  -2  17  -8   44.40    2.40
   2  17   9    2.80    1.10
  -2  17  -9    2.20    1.10
  -2  17 -10   34.60    2.50
  -2  17 -11    1.30    1.90
  -2  17 -12   41.60    3.10
   2  18 -13    3.60    1.90
   2  18 -12   15.60    1.80
   2  18 -11   51.00    3.70
   2  18 -10    6.90    2.70
   2  18  -9    7.30    1.30
  -2  18   9    7.60    1.00
   2  18  -8    1.20    1.20
  -2  18   8   -0.20    1.10
   2  18  -7   14.20    2.20
   2  18  -7    8.70    6.10
  -2  18   7   16.00    2.40
   2  18  -6   31.10    2.30
  -2  18   6   36.10    2.50
   2  18  -5   -0.20    1.00
  -2  18   5    0.60    0.80
   2  18  -4   13.80    1.60
  -2  18   4   13.40    1.80
   2  18  -3   -1.10    1.00
  -2  18   3   -0.70    1.10
   2  18  -2   16.20    1.70
  -2  18   2   16.80    1.50
   2  18  -1   19.00    1.90
   2  18  -1    9.40    5.20
  -2  18   1   17.50    1.30
   2  18   0   11.40    1.20
   2  18   0    7.40    4.90
  -2  18   0   12.20    1.30
   2  18   1  112.20    4.70
   2  18   1  108.10    9.80
  -2  18  -1  111.40    5.40
   2  18   2   13.40    1.30
   2  18   2    6.70    4.90
  -2  18  -2   14.90    2.00
   2  18   3    5.30    1.00
   2  18   3   -0.70    4.10
  -2  18  -3    4.90    1.60
   2  18   4  104.30    4.80
   2  18   4   83.70    8.50
  -2  18  -4   98.20    4.30
   2  18   5    5.20    1.00
   2  18   5    2.50    4.60
  -2  18  -5    7.60    4.40
   2  18   6   26.60    2.10
   2  18   6   16.80    6.20
  -2  18  -6   25.00    2.10
   2  18   7    6.40    2.50
   2  18   7    1.50    5.60
  -2  18  -7    7.60    4.40
   2  18   8    1.00    0.80
   2  18   8    0.10    4.60
  -2  18  -8    1.90    1.30
   2  18   9   22.50    1.80
  -2  18  -9   23.00    1.90
  -2  18 -10   13.20    1.90
  -2  18 -11   -0.20    1.20
  -2  18 -12    1.30    2.00
   2  19 -12    9.80    2.00
   2  19 -11    7.30    1.50
   2  19 -10    5.70    1.60
   2  19  -9    5.90    1.60
   2  19  -8   84.60    4.60
  -2  19   8   79.00    3.60
   2  19  -7   17.40    1.70
  -2  19   7   17.80    1.40
   2  19  -6   49.40    3.40
  -2  19   6   47.40    2.50
   2  19  -5    2.20    1.60
  -2  19   5   -0.20    0.90
   2  19  -4   51.60    3.20
  -2  19   4   53.20    3.20
   2  19  -3   42.60    2.70
  -2  19   3   38.30    2.60
   2  19  -2   37.10    2.60
  -2  19   2   47.10    6.30
   2  19  -1   -0.20    1.10
   2  19  -1    3.50    5.70
  -2  19   1    0.60    1.10
   2  19   0    5.30    2.40
   2  19   0    4.50    8.00
  -2  19   0    4.60    1.80
   2  19   1   21.30    1.80
   2  19   1   19.60    9.00
  -2  19  -1   24.10    2.50
   2  19   2   12.10    4.20
   2  19   2   -7.50    5.20
  -2  19  -2    0.70    2.70
   2  19   3   48.20    2.60
   2  19   3   29.90    5.60
  -2  19  -3   54.50    3.40
   2  19   4   16.50    1.90
   2  19   4    9.70    6.60
  -2  19  -4   16.30    2.30
   2  19   5   59.60    3.20
   2  19   5   46.80    7.10
  -2  19  -5   66.00    3.20
   2  19   6    5.80    1.50
   2  19   6    6.00    6.00
  -2  19  -6    7.20    2.00
   2  19   7  134.40    6.80
  -2  19  -7  130.10    5.80
   2  19   8    0.40    1.10
  -2  19  -8   -0.60    1.80
  -2  19  -9   34.60    2.80
  -2  19 -10   -1.90    1.80
  -2  19 -11    2.70    2.00
  -2  19 -12   24.90    3.30
   2  20 -12    1.10    1.90
   2  20 -11    4.00    1.40
   2  20 -10   45.00    2.80
   2  20  -9   -1.10    1.90
   2  20  -8    2.90    1.30
  -2  20   8    0.00    1.30
   2  20  -7   70.00    3.60
  -2  20   7   71.20    3.30
   2  20  -6    0.30    1.30
  -2  20   6    1.70    1.10
   2  20  -5   27.70    2.00
  -2  20   5   28.40    2.20
   2  20  -4   24.70    2.50
  -2  20   4   23.90    2.20
   2  20  -3    1.60    1.20
  -2  20   3    1.50    1.60
   2  20  -2   72.80    3.30
   2  20  -2   42.10    7.80
  -2  20   2   74.10    3.40
   2  20  -1  101.60    4.50
   2  20  -1   83.30   11.80
  -2  20   1  103.40    4.50
   2  20   0   53.40    3.30
   2  20   0   38.90    7.60
  -2  20   0   52.00    3.10
   2  20   1   34.70    2.90
   2  20   1   12.10    8.40
  -2  20  -1   35.10    2.60
   2  20   2    0.50    1.60
   2  20   2   -2.40    7.70
  -2  20  -2    0.60    2.00
   2  20   3    8.60    1.80
   2  20   3    4.90    7.10
  -2  20  -3   11.10    2.30
   2  20   4    7.20    1.40
   2  20   4    5.00    7.10
  -2  20  -4    6.40    1.80
   2  20   5   -0.10    1.00
   2  20   5   -4.30    5.10
  -2  20  -5    0.80    1.30
   2  20   6    0.90    1.40
   2  20   6    4.10    7.10
  -2  20  -6   -0.10    1.40
   2  20   7    6.60    1.50
   2  20   7    3.10    7.40
  -2  20  -7    5.10    1.40
   2  20   8    5.30    1.80
  -2  20  -8    3.90    2.00
  -2  20  -9    5.70    2.10
  -2  20 -10   24.60    2.20
  -2  20 -11    3.10    2.20
   2  21 -10    0.10    2.20
   2  21  -9   20.10    2.00
   2  21  -8    1.80    3.30
  -2  21   8   -0.80    1.70
   2  21  -7   53.90    3.70
  -2  21   7   57.00    3.30
   2  21  -6   -1.10    2.00
  -2  21   6   -0.70    1.60
   2  21  -5    0.00    1.20
  -2  21   5   -0.70    1.50
   2  21  -4   17.10    1.80
  -2  21   4   19.70    2.00
   2  21  -3   22.30    2.30
  -2  21   3   21.80    2.00
   2  21  -2    0.10    1.80
  -2  21   2    1.10    1.50
   2  21  -1   45.60    2.90
  -2  21   1   45.40    2.70
   2  21   0   25.40    1.90
  -2  21   0   24.60    2.20
   2  21   1   44.10    2.60
  -2  21  -1   48.80    3.10
   2  21   2    0.60    1.60
   2  21   2    1.60    8.60
  -2  21  -2    0.30    1.20
   2  21   3   58.00    3.20
   2  21   3   25.10    8.30
  -2  21  -3   54.60    3.20
   2  21   4    2.80    1.10
   2  21   4   -5.80    5.50
  -2  21  -4    5.40    1.80
   2  21   5   12.50    1.40
  -2  21  -5   10.70    2.10
   2  21   6   23.90    2.30
   2  21   6   11.20    7.40
  -2  21  -6   21.40    2.00
   2  21   7   37.10    3.10
  -2  21  -7   38.20    2.90
   2  21   8    9.90    1.80
  -2  21  -8    7.80    2.30
  -2  21  -9   14.40    2.60
  -2  21 -10    6.30    1.80
   2  22  -9    5.00    2.90
   2  22  -8   20.60    2.80
   2  22  -7   40.90    4.30
  -2  22   7   36.20    2.30
   2  22  -6   17.40    2.10
  -2  22   6   17.70    2.20
   2  22  -5   23.20    2.60
  -2  22   5   23.00    2.20
   2  22  -4    7.50    3.50
  -2  22   4    1.00    1.20
   2  22  -3   16.10    2.30
  -2  22   3   19.80    2.30
   2  22  -2    1.30    1.30
  -2  22   2   -0.40    1.90
   2  22  -1   18.20    2.00
  -2  22   1   17.30    1.90
   2  22   0    4.20    1.80
  -2  22   0    3.60    2.10
   2  22   1    0.40    1.10
  -2  22  -1    1.50    1.30
   2  22   2   11.30    1.60
  -2  22  -2   12.10    1.70
   2  22   3    1.30    1.20
  -2  22  -3    1.70    1.40
   2  22   4    1.00    1.10
  -2  22  -4    2.10    2.20
   2  22   5    1.10    1.90
  -2  22  -5    1.90    2.10
   2  22   6    1.80    1.10
  -2  22  -6    2.20    1.40
   2  22   7   17.00    4.40
  -2  22  -7   12.80    2.60
  -2  22  -8   26.50    2.70
   2  23  -7    7.00    2.50
  -2  23   7    7.20    1.40
   2  23  -6   78.40    4.40
  -2  23   6   88.40    4.50
   2  23  -5    0.50    1.40
  -2  23   5    1.10    1.20
   2  23  -4   29.50    2.70
  -2  23   4   28.70    2.20
   2  23  -3   13.40    2.40
  -2  23   3   10.90    1.90
   2  23  -2   11.20    1.90
  -2  23   2    9.20    2.30
   2  23  -1   12.10    2.30
  -2  23   1   10.10    1.60
   2  23   0   26.60    2.30
  -2  23   0   28.10    3.30
   2  23   1    0.40    1.90
  -2  23  -1    0.50    1.30
   2  23   2    0.80    2.00
  -2  23  -2    0.40    1.50
   2  23   3   20.00    4.00
  -2  23  -3   28.90    8.80
   2  23   4    0.80    1.80
  -2  23  -4    0.80    1.60
   2  23   5   14.80    2.10
  -2  23  -5   17.00    2.60
   2  23   6    1.40    1.40
  -2  23  -6    1.50    2.70
   2  23   7   38.40    3.00
  -2  24   7   13.40    2.10
  -2  24   6    3.80    1.60
   2  24  -5    8.90    2.50
  -2  24   5    7.80    1.50
   2  24  -4    5.60    2.50
  -2  24   4    6.90    1.60
   2  24  -3    4.80    2.00
  -2  24   3    3.70    2.10
   2  24  -2    1.40    2.10
  -2  24   2    2.20    2.10
   2  24  -1    1.30    1.40
  -2  24   1    3.30    2.50
   2  24   0   53.00    3.60
  -2  24   0   53.60    4.10
   2  24   1   35.00    2.70
  -2  24  -1   33.20    2.90
   2  24   2   65.50    4.00
  -2  24  -2   63.60    4.30
   2  24   3    2.00    2.70
  -2  24  -3   -0.40    1.30
   2  24   4   -0.70    2.00
  -2  24  -4    2.80    2.10
   2  24   5    0.60    1.30
   2  24   6   68.90    4.30
  -2  25   6   48.00    3.20
  -2  25   5    4.50    2.40
  -2  25   4   22.00    2.60
  -2  25   3   13.20    2.20
   2  25  -2    7.40    1.70
  -2  25   2    8.80    1.60
   2  25  -1   -0.10    2.00
  -2  25   1    0.10    2.20
   2  25   0   33.10    2.90
  -2  25   0   32.10    3.00
   2  25   1   -2.00    2.20
  -2  25  -1   -0.20    1.40
   2  25   2    4.90    1.50
   2  25   3    4.60    1.60
   2  25   4   -0.60    1.70
   2  25   5   10.10    2.50
   2  25   6    5.90    2.20
  -2  26   5   18.20    3.50
  -3   0  16    0.10    1.20
  -3   0  15   42.70    3.10
  -3   0  14   -0.70    1.10
  -3   0  13   25.00    1.80
  -3   0  12    0.20    0.90
  -3   0  11  243.50    9.00
   3   0 -10    0.20    0.30
   3   0 -10    0.10    0.30
   3   0 -10    1.10    1.20
  -3   0  10   -0.20    1.00
   3   0  -9  524.40   17.90
   3   0  -9  565.40   20.70
  -3   0   9  552.20   18.90
  -3   0   9  543.30   19.10
   3   0  -8   -0.40    0.40
   3   0  -8    0.90    1.30
  -3   0   8    0.00    0.30
  -3   0   8   -0.60    0.60
   3   0  -7  477.00   16.80
   3   0  -7  527.80   19.90
  -3   0   7  497.90   17.60
  -3   0   7  514.40   17.20
  -3   0   7  517.40   22.90
   3   0  -6   -0.10    0.50
   3   0  -6   -1.90    1.40
  -3   0   6    0.10    0.30
  -3   0   6   -0.70    0.60
  -3   0   6   -1.20    1.30
   3   0  -5 1031.50   34.50
   3   0  -5 1115.80   37.90
  -3   0   5 1015.60   35.10
  -3   0   5 1063.30   34.80
  -3   0   5 1082.40   40.40
   3   0  -4   -0.10    0.40
   3   0  -4    1.50    1.40
  -3   0   4    0.20    0.70
  -3   0   4   -0.20    0.30
  -3   0   4    0.00    1.00
   3   0  -3  256.20    9.10
   3   0  -3  275.50   10.70
  -3   0   3  253.50    9.80
  -3   0   3  274.70    9.40
  -3   0   3  278.20   11.90
   3   0  -2    0.30    0.40
   3   0  -2    0.60    1.00
  -3   0   2    0.10    0.40
  -3   0   2    0.10    0.20
  -3   0   2    0.50    1.10
   3   0  -1  312.40   10.80
   3   0  -1  327.90   12.60
  -3   0   1  301.60   11.30
  -3   0   1  325.00   10.90
  -3   0   1  331.50   13.00
   3   0   0    0.30    0.40
   3   0   0    0.40    1.00
  -3   0   0    0.30    0.30
  -3   0   0    0.80    1.10
   3   0   1  313.90   11.00
   3   0   1  310.70   10.70
   3   0   1  332.00   13.00
  -3   0  -1  304.60   11.70
  -3   0  -1  343.30   16.70
   3   0   2   -0.10    0.30
   3   0   2   -0.20    0.20
   3   0   2    1.30    1.20
  -3   0  -2    0.00    0.30
  -3   0  -2    1.70    1.60
   3   0   3  224.00    8.40
   3   0   3  223.10    9.00
   3   0   3  230.90   10.30
  -3   0  -3  222.30    9.50
  -3   0  -3  242.90   10.00
   3   0   4   -0.30    0.40
   3   0   4   -0.10    0.30
   3   0   4    0.80    1.20
  -3   0  -4   -0.10    0.40
  -3   0  -4   -1.20    1.70
   3   0   5   69.10    2.80
   3   0   5   76.00    3.40
   3   0   5   70.40    3.90
  -3   0  -5   69.60    2.70
  -3   0  -5   76.90    4.30
   3   0   6    0.00    0.40
   3   0   6    0.30    0.40
   3   0   6   -1.40    1.80
  -3   0  -6   -0.10    0.30
  -3   0  -6   -0.60    1.50
   3   0   7   41.10    1.80
   3   0   7   40.30    1.80
  -3   0  -7   41.50    2.00
  -3   0  -7   44.30    3.50
   3   0   8    0.10    0.40
   3   0   8    5.50    2.20
  -3   0  -8    0.40    1.40
  -3   0  -8    0.00    1.40
   3   0   9  143.30    5.30
   3   0   9  142.50    5.60
  -3   0  -9  143.60    6.20
  -3   0  -9  148.70    7.40
   3   0  10    0.10    0.60
   3   0  10   -0.10    0.90
  -3   0 -10   -0.10    0.40
  -3   0 -10    0.10    2.10
   3   0  11  201.70    7.60
   3   0  11  201.40    8.20
  -3   0 -11  197.00    8.10
  -3   0 -11  197.60   10.70
   3   0  12   -0.40    0.40
   3   0  12    0.30    1.20
  -3   0 -12   -0.70    2.40
   3   0  13   18.80    1.80
   3   0  14   -0.30    1.00
   3   0  15    0.90    1.10
   3   0  16   -0.20    1.30
  -3   1  16    0.50    1.80
  -3  -1  16    0.30    1.20
  -3   1  15   14.00    2.10
  -3  -1  15   14.00    1.70
  -3   1  14    2.30    1.50
  -3  -1  14    2.10    1.50
  -3   1  13    6.00    1.60
  -3  -1  13    5.10    1.10
  -3   1  12   17.80    1.70
  -3  -1  12   18.10    1.40
   3   1 -11   67.40    2.60
   3   1 -11   66.10    2.70
   3   1 -11   70.70    3.30
  -3   1  11   77.20    3.50
  -3  -1  11   75.10    3.30
   3   1 -10  116.00    4.20
   3   1 -10  115.70    4.20
   3   1 -10  122.50    5.30
  -3   1  10  115.40    4.60
  -3  -1  10  109.70    4.40
   3  -1 -10  106.20    3.70
   3  -1 -10  102.50    3.70
   3   1  -9   31.40    1.30
   3   1  -9   28.60    2.50
  -3   1   9   29.80    1.40
  -3   1   9   27.20    1.70
  -3  -1   9   28.40    1.40
  -3  -1   9   24.10    1.50
   3  -1  -9   30.80    1.30
   3  -1  -9   33.20    1.90
   3   1  -8   50.20    2.10
   3   1  -8   53.70    3.20
  -3   1   8   55.30    2.90
  -3   1   8   50.60    2.20
  -3  -1   8   53.50    2.20
  -3  -1   8   53.50    2.20
   3  -1  -8   51.80    2.20
   3  -1  -8   45.00    3.20
   3   1  -7  194.80    7.20
   3   1  -7  205.30    8.80
  -3   1   7  198.90    7.20
  -3   1   7  194.80    7.20
  -3   1   7  204.90    9.10
  -3  -1   7  201.00    7.40
  -3  -1   7  193.40    7.40
   3  -1  -7  195.90    7.10
   3  -1  -7  214.80    8.90
   3   1  -6    0.40    0.40
   3   1  -6    0.50    0.70
   3   1  -6    1.70    1.50
  -3   1   6    0.40    0.30
  -3   1   6    0.60    0.50
  -3   1   6    1.00    1.30
  -3  -1   6    0.70    0.60
  -3  -1   6   -0.20    0.70
  -3  -1   6    1.40    1.40
   3  -1  -6    1.10    0.80
   3  -1  -6   -0.80    1.20
   3   1  -5   69.20    2.70
   3   1  -5   62.70    2.70
   3   1  -5   73.90    4.00
  -3   1   5   66.00    2.70
  -3   1   5   63.80    2.60
  -3   1   5   70.60    3.50
  -3  -1   5   68.10    3.00
  -3  -1   5   62.10    2.60
  -3  -1   5   73.30    4.00
   3  -1  -5   66.00    2.70
   3  -1  -5   72.20    4.00
   3   1  -4    0.80    0.40
   3   1  -4    0.80    0.40
   3   1  -4    0.10    1.50
  -3   1   4    1.60    0.70
  -3   1   4    0.40    0.30
  -3   1   4   -0.80    1.40
  -3  -1   4    0.50    0.40
  -3  -1   4    0.40    0.30
  -3  -1   4    1.10    1.40
   3  -1  -4    0.10    0.30
   3  -1  -4    0.60    1.00
   3   1  -3  135.20    5.00
   3   1  -3  133.90    5.30
   3   1  -3  145.90    6.10
  -3   1   3  134.20    5.30
  -3   1   3  130.80    4.90
  -3   1   3  147.30    7.40
  -3  -1   3  134.70    5.00
  -3  -1   3  133.50    5.00
  -3  -1   3  148.90    6.30
   3  -1  -3  134.30    4.90
   3  -1  -3  146.30    6.40
   3   1  -2   10.70    0.60
   3   1  -2   11.10    0.60
   3   1  -2    7.70    1.50
  -3   1   2   10.40    0.70
  -3   1   2   10.80    0.60
  -3   1   2   11.80    1.80
  -3  -1   2   10.60    0.60
  -3  -1   2   11.90    1.70
   3  -1  -2   10.80    0.70
   3  -1  -2   10.50    1.40
   3   1  -1   59.50    2.50
   3   1  -1   56.70    2.30
   3   1  -1   56.80    3.60
  -3   1   1   56.90    2.30
  -3   1   1   55.50    2.10
  -3   1   1   68.30    3.30
  -3  -1   1   58.10    2.40
  -3  -1   1   65.00    3.70
   3  -1  -1   59.00    2.40
   3  -1  -1   62.90    3.30
   3   1   0   26.10    1.20
   3   1   0   26.40    2.40
  -3   1   0   26.40    1.70
  -3   1   0   31.80    2.80
  -3  -1   0   26.50    1.60
  -3  -1   0   26.40    2.50
   3  -1   0   26.60    1.30
   3  -1   0   27.30    2.40
   3   1   1  381.60   15.00
   3   1   1  399.20   15.00
  -3   1  -1  356.00   13.00
  -3   1  -1  365.40   12.50
  -3   1  -1  398.50   14.80
  -3  -1  -1  359.30   13.00
  -3  -1  -1  393.50   14.20
   3  -1   1  369.20   13.30
   3  -1   1  377.50   14.60
   3   1   2   38.50    1.60
   3   1   2   35.30    2.80
  -3   1  -2   37.00    1.70
  -3   1  -2   37.70    1.70
  -3   1  -2   42.00    3.40
  -3  -1  -2   39.30    1.70
  -3  -1  -2   45.70    2.90
   3  -1   2   38.40    1.70
   3  -1   2   40.00    1.70
   3  -1   2   35.80    2.80
   3   1   3    6.50    0.50
   3   1   3    7.00    0.50
   3   1   3    6.30    1.60
  -3   1  -3    6.40    0.70
  -3   1  -3    6.50    2.00
  -3  -1  -3    6.90    0.60
  -3  -1  -3    7.80    2.20
   3  -1   3    7.30    0.70
   3  -1   3    7.20    0.40
   3  -1   3    5.30    1.80
   3   1   4   25.40    1.20
   3   1   4   25.80    1.40
   3   1   4   26.80    2.20
  -3   1  -4   24.10    1.20
  -3   1  -4   26.10    2.70
  -3  -1  -4   25.60    1.30
  -3  -1  -4   25.80    2.60
   3  -1   4   25.90    1.20
   3  -1   4   25.80    1.40
   3  -1   4   21.90    2.50
   3   1   5  101.00    4.40
   3   1   5   92.40    3.70
   3   1   5   94.80    5.40
  -3   1  -5   96.30    4.50
  -3   1  -5  106.00    5.50
  -3  -1  -5   98.60    3.70
  -3  -1  -5  106.00    5.10
   3  -1   5   95.10    3.70
   3  -1   5   93.20    3.80
   3  -1   5   90.40    5.00
   3   1   6  126.50    4.80
   3   1   6  130.20    5.30
   3   1   6  132.10    6.40
  -3   1  -6  131.30    5.80
  -3   1  -6  143.30    7.00
  -3  -1  -6  126.30    5.20
  -3  -1  -6  137.30    7.20
   3  -1   6  128.00    4.90
   3  -1   6  123.00    5.00
   3   1   7    4.50    0.50
   3   1   7    4.00    0.60
   3   1   7    1.90    1.90
  -3   1  -7    3.60    0.50
  -3   1  -7    4.70    2.20
  -3  -1  -7    4.80    0.60
  -3  -1  -7    2.10    1.90
   3  -1   7    4.80    0.50
   3  -1   7    4.50    0.60
   3   1   8  100.70    3.90
   3   1   8  104.80    5.20
  -3   1  -8  104.40    5.10
  -3   1  -8  116.20    6.90
  -3  -1  -8   96.30    4.30
  -3  -1  -8  107.10    5.80
   3  -1   8  106.00    4.20
   3  -1   8  113.50    5.70
   3   1   9    8.80    0.80
   3   1   9    7.50    0.90
  -3   1  -9    9.60    0.80
  -3   1  -9    8.10    2.70
  -3  -1  -9    9.40    0.70
  -3  -1  -9    7.90    2.10
   3  -1   9    8.70    0.70
   3  -1   9    7.60    0.80
   3   1  10   80.80    3.40
   3   1  10   77.90    3.30
  -3   1 -10   73.90    3.40
  -3   1 -10   86.10    5.40
  -3  -1 -10   77.00    3.50
  -3  -1 -10   80.40    5.30
   3  -1  10   77.40    3.20
   3  -1  10   74.50    3.70
   3   1  11   17.70    1.20
   3   1  11   17.60    1.50
  -3   1 -11   13.60    1.10
  -3   1 -11   11.80    3.00
  -3  -1 -11   15.10    0.90
  -3  -1 -11   15.60    2.50
   3  -1  11   13.50    0.80
   3  -1  11   16.90    1.50
   3   1  12    6.30    1.50
  -3   1 -12    5.50    2.70
   3  -1  12    5.60    0.60
   3  -1  12    4.50    1.00
   3   1  13   66.00    3.50
   3  -1  13   59.90    3.30
   3   1  14    0.00    1.40
   3  -1  14    0.60    1.10
   3   1  15   35.20    2.60
   3  -1  15   39.00    3.20
   3   1  16    3.30    1.40
  -3   2  16    0.90    1.30
  -3   2  15   57.50    3.70
  -3  -2  15   57.20    3.90
  -3   2  14   21.80    1.90
  -3  -2  14   18.90    2.00
  -3   2  13   38.00    2.20
  -3  -2  13   36.70    2.40
   3   2 -12   11.40    0.60
   3   2 -12   10.50    0.70
   3   2 -12   10.90    1.50
  -3   2  12   11.20    1.20
  -3  -2  12   10.60    1.10
   3   2 -11  174.20    6.50
   3   2 -11  174.30    6.50
   3   2 -11  184.90    8.10
  -3   2  11  176.70    6.70
  -3  -2  11  168.20    7.40
   3   2 -10    6.30    0.60
   3   2 -10    5.10    0.60
   3   2 -10    4.40    1.50
  -3   2  10    8.20    1.10
  -3  -2  10    6.30    0.90
   3   2  -9  168.30    6.20
   3   2  -9  169.80    6.80
   3   2  -9  176.60    7.70
  -3   2   9  172.60    6.30
  -3   2   9  186.60    6.90
  -3  -2   9  175.40    6.80
   3  -2  -9  170.60    6.00
   3   2  -8   67.20    2.60
   3   2  -8   66.10    3.10
   3   2  -8   74.00    4.20
  -3   2   8   76.80    3.30
  -3   2   8   64.80    2.70
  -3   2   8   70.20    3.80
  -3  -2   8   72.50    3.10
  -3  -2   8   67.40    3.00
   3  -2  -8   69.20    2.70
   3   2  -7    3.20    0.50
   3   2  -7    2.90    0.60
   3   2  -7    3.30    1.80
  -3   2   7    3.40    0.30
  -3   2   7    3.00    0.60
  -3   2   7    1.40    1.30
  -3  -2   7    4.90    1.00
  -3  -2   7    3.50    0.80
   3  -2  -7    3.10    0.30
   3  -2  -7    3.90    1.30
   3   2  -6  405.80   13.50
   3   2  -6  391.00   14.40
   3   2  -6  431.80   16.50
  -3   2   6  401.10   14.50
  -3   2   6  411.40   14.80
  -3   2   6  416.60   16.90
  -3  -2   6  401.80   13.80
  -3  -2   6  409.20   14.40
  -3  -2   6  425.60   17.00
   3  -2  -6  389.60   13.80
   3  -2  -6  425.30   16.00
   3   2  -5   63.80    2.70
   3   2  -5   66.30    2.60
   3   2  -5   63.90    4.10
  -3   2   5   62.90    2.60
  -3   2   5   66.90    2.60
  -3   2   5   63.80    3.60
  -3  -2   5   64.00    2.60
  -3  -2   5   64.40    2.60
  -3  -2   5   70.30    4.10
   3  -2  -5   61.10    2.50
   3  -2  -5   66.70    3.80
   3   2  -4  357.10   12.60
   3   2  -4  360.70   12.60
   3   2  -4  377.20   15.00
  -3   2   4  360.30   12.80
  -3   2   4  359.80   12.60
  -3   2   4  381.90   15.50
  -3  -2   4  358.50   12.60
  -3  -2   4  372.20   12.90
  -3  -2   4  379.30   14.40
   3  -2  -4  367.60   12.80
   3  -2  -4  390.40   15.20
   3   2  -3  180.40    6.40
   3   2  -3  182.20    6.80
   3   2  -3  193.10    8.30
  -3   2   3  171.40    6.40
  -3   2   3  185.50    8.40
  -3  -2   3  175.90    6.40
  -3  -2   3  183.30    7.80
   3  -2  -3  180.30    6.40
   3  -2  -3  195.50    8.70
   3   2  -2   12.90    0.70
   3   2  -2   15.00    0.70
   3   2  -2   13.00    1.70
  -3   2   2   13.00    0.70
  -3   2   2   13.60    1.80
  -3  -2   2   13.80    0.70
  -3  -2   2   12.60    1.80
   3  -2  -2   13.30    0.80
   3  -2  -2   14.30    2.00
   3   2  -1    3.90    0.60
   3   2  -1    3.60    1.60
  -3   2   1    3.00    0.40
  -3   2   1    3.40    1.20
  -3  -2   1    3.10    0.50
  -3  -2   1    2.70    1.90
   3  -2  -1    3.40    0.50
   3  -2  -1    1.70    1.60
   3   2   0   72.40    2.90
   3   2   0   73.90    4.20
  -3   2   0   71.50    3.40
  -3   2   0   72.20    4.10
  -3  -2   0   69.70    2.70
  -3  -2   0   70.80    4.20
   3  -2   0   71.50    3.00
   3  -2   0   77.00    3.90
   3   2   1   70.30    3.70
   3   2   1   74.30    4.10
  -3   2  -1   68.10    3.30
  -3   2  -1   67.30    4.60
  -3  -2  -1   67.30    2.80
  -3  -2  -1   67.70    3.80
   3  -2   1   67.60    2.50
   3  -2   1   70.00    3.60
   3   2   2   14.60    0.70
   3   2   2   12.50    2.00
  -3   2  -2   15.50    2.10
  -3   2  -2   15.20    0.70
  -3   2  -2   17.50    1.90
  -3  -2  -2   15.10    1.00
  -3  -2  -2   13.90    2.40
   3  -2   2   14.80    0.80
   3  -2   2   12.20    1.80
   3   2   3   21.40    1.10
   3   2   3   20.70    2.20
  -3   2  -3   20.60    1.00
  -3   2  -3   21.70    1.30
  -3   2  -3   21.80    2.20
  -3  -2  -3   20.40    1.10
  -3  -2  -3   26.30    2.30
   3  -2   3   19.80    1.00
   3  -2   3   20.80    2.20
   3   2   4    7.50    0.80
   3   2   4    6.30    1.80
  -3   2  -4    6.70    0.80
  -3   2  -4    6.70    0.60
  -3   2  -4    8.20    2.80
  -3  -2  -4    6.20    0.50
  -3  -2  -4    5.20    1.30
   3  -2   4    5.90    0.50
   3  -2   4    7.20    0.60
   3   2   5  256.70    9.40
   3   2   5  258.30    9.40
   3   2   5  270.60   12.80
  -3   2  -5  252.00    9.40
  -3   2  -5  277.30   11.60
  -3   2  -5  291.20   12.10
  -3  -2  -5  266.90    9.70
  -3  -2  -5  289.90   11.40
   3  -2   5  268.70    9.80
   3  -2   5  265.40    9.60
   3   2   6    8.90    0.60
   3   2   6    8.90    0.70
   3   2   6    9.10    1.50
  -3   2  -6    8.90    0.70
  -3   2  -6    7.70    0.60
  -3   2  -6   11.00    2.50
  -3  -2  -6    8.30    0.60
  -3  -2  -6    9.60    1.80
   3  -2   6    9.30    0.70
   3  -2   6    9.10    0.90
   3   2   7  125.60    4.80
   3   2   7  119.30    4.80
   3   2   7  123.80    6.50
  -3   2  -7  124.90    4.90
  -3   2  -7  134.90    7.80
  -3  -2  -7  125.00    4.90
  -3  -2  -7  130.20    6.20
   3  -2   7  123.40    4.80
   3  -2   7  118.00    5.20
   3   2   8   15.60    0.90
   3   2   8   16.60    3.00
   3   2   8   10.20    2.20
  -3   2  -8   16.00    1.50
  -3   2  -8   17.30    2.80
  -3  -2  -8   15.00    1.00
  -3  -2  -8   15.10    2.60
   3  -2   8   14.90    1.00
   3  -2   8   16.50    2.90
   3   2   9   15.40    1.00
   3   2   9   15.20    1.00
  -3   2  -9   15.80    1.10
  -3   2  -9   13.50    3.00
  -3  -2  -9   16.00    1.20
  -3  -2  -9   23.00    3.40
   3  -2   9   15.90    1.10
   3  -2   9   16.20    1.30
   3   2  10    0.80    0.40
   3   2  10    1.10    1.00
  -3   2 -10    0.40    0.50
  -3   2 -10    0.90    2.30
  -3  -2 -10    0.70    0.50
  -3  -2 -10   -1.80    2.00
   3  -2  10    0.20    0.30
   3  -2  10    0.90    0.70
   3   2  11   58.90    2.40
   3   2  11   56.00    2.90
  -3   2 -11   60.80    3.00
  -3   2 -11   64.30    5.00
  -3  -2 -11   58.70    2.70
  -3  -2 -11   65.20    4.10
   3  -2  11   57.10    2.40
   3  -2  11   56.40    3.10
   3   2  12   40.40    2.00
  -3   2 -12   43.00    3.70
   3  -2  12   40.70    1.80
   3  -2  12   44.00    2.50
   3   2  13   23.60    1.80
   3  -2  13   22.10    2.00
   3   2  14   70.00    3.50
   3   2  15    0.20    1.90
   3   2  16   27.80    2.60
  -3   3  16    4.70    1.40
  -3   3  15    2.80    1.30
  -3   3  14    0.50    1.60
  -3   3  13   61.00    3.10
  -3  -3  13   52.90    3.10
   3   3 -12    7.70    0.70
   3   3 -12    7.70    0.60
   3   3 -12    5.20    2.10
  -3   3  12    7.50    1.10
  -3  -3  12    7.30    1.80
   3   3 -11   30.60    1.70
   3   3 -11   29.80    1.40
   3   3 -11   31.80    3.00
  -3   3  11   26.50    1.90
  -3  -3  11   26.20    1.90
   3   3 -10  156.00    5.80
   3   3 -10  154.20    5.70
   3   3 -10  146.20    6.80
   3   3 -10  160.00    7.50
  -3   3  10  158.30    6.00
  -3  -3  10  158.10    6.50
   3   3  -9   80.70    3.20
   3   3  -9   83.50    3.20
   3   3  -9   78.00    3.30
   3   3  -9   87.10    5.00
  -3   3   9   83.60    3.00
  -3   3   9   80.20    3.30
  -3  -3   9   76.80    3.80
   3  -3  -9   81.50    3.00
   3   3  -8  189.10    7.00
   3   3  -8  191.00    7.70
   3   3  -8  194.80    9.00
  -3   3   8  196.00    7.30
  -3   3   8  204.20    7.30
  -3   3   8  197.20    8.30
  -3  -3   8  203.30    7.60
  -3  -3   8  202.00    8.00
   3  -3  -8  189.80    6.90
   3   3  -7   10.00    0.70
   3   3  -7    9.50    0.70
   3   3  -7    9.70    2.20
  -3   3   7    9.60    0.70
  -3   3   7   10.00    0.90
  -3   3   7    8.40    1.70
  -3  -3   7   10.30    0.70
  -3  -3   7    7.90    0.90
   3  -3  -7   10.10    0.60
   3   3  -6   72.10    3.00
   3   3  -6   78.10    3.10
   3   3  -6   72.00    4.20
  -3   3   6   73.70    2.90
  -3   3   6   79.10    3.20
  -3   3   6   78.20    3.80
  -3  -3   6   74.50    2.80
   3  -3  -6   70.60    2.90
   3   3  -5    0.30    0.50
   3   3  -5    0.10    0.50
   3   3  -5   -0.40    2.00
  -3   3   5   -0.10    0.20
  -3   3   5   -1.10    1.50
  -3  -3   5    1.10    0.50
  -3  -3   5    0.10    1.70
   3  -3  -5    0.50    0.40
   3  -3  -5    0.50    1.30
   3   3  -4  324.00   10.90
   3   3  -4  340.30   12.00
   3   3  -4  347.00   13.80
  -3   3   4  310.90   11.10
  -3   3   4  337.30   14.30
  -3  -3   4  320.20   11.20
  -3  -3   4  347.20   12.80
   3  -3  -4  328.10   11.60
   3  -3  -4  339.70   13.30
   3   3  -3   82.90    3.10
   3   3  -3   79.70    3.10
   3   3  -3   86.10    4.50
  -3   3   3   82.90    3.40
  -3   3   3   97.00    4.50
  -3  -3   3   83.30    3.10
  -3  -3   3   87.00    4.50
   3  -3  -3   79.50    3.10
   3  -3  -3   84.30    4.40
   3   3  -2    0.30    0.50
   3   3  -2    1.60    1.40
  -3   3   2    0.90    0.30
  -3   3   2    0.20    1.10
  -3  -3   2    0.60    0.40
  -3  -3   2    1.50    1.70
   3  -3  -2    1.10    0.30
   3  -3  -2    1.30    1.30
   3   3  -1  530.30   17.50
   3   3  -1  554.40   20.70
  -3   3   1  519.70   17.80
  -3   3   1  560.70   20.30
  -3  -3   1  513.90   19.60
  -3  -3   1  557.20   21.10
   3  -3  -1  515.30   17.80
   3  -3  -1  544.20   19.90
   3   3   0    0.00    0.30
   3   3   0   -0.20    1.10
  -3   3   0    0.00    0.30
  -3   3   0    1.00    1.20
  -3  -3   0    0.40    0.30
  -3  -3   0    0.70    1.70
   3  -3   0   -0.10    0.50
   3  -3   0    0.40    1.60
   3   3   1  107.00    4.00
   3   3   1  110.80    5.00
  -3   3  -1  101.10    4.10
  -3   3  -1  112.40    5.00
  -3  -3  -1  102.60    4.00
  -3  -3  -1  112.10    5.40
   3  -3   1  103.70    4.00
   3  -3   1  100.50    5.00
   3   3   2    0.80    0.50
   3   3   2    2.40    1.70
  -3   3  -2    0.90    0.40
  -3   3  -2    0.90    0.30
  -3   3  -2    1.00    1.30
  -3  -3  -2    0.40    0.40
  -3  -3  -2    0.00    1.80
   3  -3   2    0.30    0.50
   3   3   3  304.40   12.00
   3   3   3  319.60   13.20
  -3   3  -3  295.20   11.30
  -3   3  -3  304.00   11.80
  -3   3  -3  327.20   13.20
  -3  -3  -3  298.30   10.60
  -3  -3  -3  340.00   13.60
   3  -3   3  308.00   10.80
   3   3   4   13.70    0.90
   3   3   4    9.60    1.80
  -3   3  -4   13.90    1.10
  -3   3  -4   14.90    1.10
  -3   3  -4   12.10    2.50
  -3  -3  -4   13.30    0.90
  -3  -3  -4   12.50    1.80
   3  -3   4   13.00    0.80
   3   3   5    3.90    0.50
   3   3   5    4.10    1.70
  -3   3  -5    3.50    0.50
  -3   3  -5    4.00    0.60
  -3   3  -5    6.70    2.30
  -3  -3  -5    4.20    0.50
  -3  -3  -5    4.90    2.10
   3  -3   5    3.90    0.50
   3   3   6   47.30    2.20
   3   3   6   47.00    2.30
   3   3   6   49.80    3.20
  -3   3  -6   45.10    2.10
  -3   3  -6   45.10    2.20
  -3   3  -6   54.20    4.20
  -3  -3  -6   46.60    2.00
  -3  -3  -6   49.90    3.30
   3  -3   6   47.90    2.30
   3   3   7   51.10    2.30
   3   3   7   55.10    2.20
   3   3   7   46.00    3.80
  -3   3  -7   50.70    2.20
  -3   3  -7   50.50    2.50
  -3   3  -7   57.60    3.90
  -3  -3  -7   53.80    2.30
  -3  -3  -7   57.70    4.10
   3  -3   7   52.30    2.30
   3   3   8   75.40    3.30
   3   3   8   74.40    3.30
   3   3   8   77.20    4.20
  -3   3  -8   71.80    3.10
  -3   3  -8   69.10    3.30
  -3   3  -8   74.80    5.70
  -3  -3  -8   73.50    2.90
  -3  -3  -8   76.40    4.80
   3  -3   8   76.70    3.60
   3  -3   8   71.50    3.60
   3   3   9   -0.20    0.30
   3   3   9   -0.20    0.90
  -3   3  -9    0.10    0.60
  -3   3  -9   -2.30    2.50
  -3  -3  -9    0.40    0.60
  -3  -3  -9    1.50    2.60
   3  -3   9    0.20    0.50
   3  -3   9    0.00    0.50
   3   3  10  207.10    7.30
   3   3  10  195.80    8.00
  -3   3 -10  193.30    8.00
  -3   3 -10  206.70   10.00
  -3  -3 -10  211.70    8.10
  -3  -3 -10  226.10   10.40
   3  -3  10  203.80    7.70
   3  -3  10  196.90    8.50
   3   3  11   42.50    1.90
   3   3  11   36.70    2.30
  -3   3 -11   46.50    3.10
  -3   3 -11   53.10    4.40
  -3  -3 -11   42.10    2.20
  -3  -3 -11   45.60    3.50
   3  -3  11   41.40    2.00
   3   3  12   40.10    2.30
  -3   3 -12   53.50    4.70
   3  -3  12   46.80    2.10
   3   3  13    0.40    1.30
   3   3  14    0.10    1.10
   3   3  15    3.40    1.30
   3   3  16    5.30    2.90
  -3   4  16   18.20    2.20
  -3   4  15   18.10    2.30
  -3   4  14    1.00    1.10
  -3   4  13    5.50    1.20
   3   4 -12   17.60    1.10
   3   4 -12   19.00    1.10
   3   4 -12   20.10    2.80
  -3   4  12   20.10    1.70
   3   4 -11    9.80    0.80
   3   4 -11    8.50    0.80
   3   4 -11    6.50    2.40
  -3   4  11    8.60    1.10
   3   4 -10    3.00    0.50
   3   4 -10    2.20    1.10
   3   4 -10    1.20    0.80
   3   4 -10   -0.50    2.30
  -3   4  10    1.20    0.70
   3   4  -9    0.10    0.50
   3   4  -9   -0.10    0.50
   3   4  -9    1.10    1.00
   3   4  -9   -0.70    2.30
  -3   4   9    0.30    0.20
  -3   4   9    0.80    0.80
  -3   4   9    0.70    0.80
   3  -4  -9    0.50    0.30
   3   4  -8  163.70    6.10
   3   4  -8  170.70    6.70
   3   4  -8  177.80    8.00
  -3   4   8  176.90    6.40
  -3   4   8  180.20    7.30
  -3   4   8  186.20    7.40
  -3  -4   8  171.60    6.30
   3  -4  -8  172.60    6.50
   3   4  -7   60.40    2.40
   3   4  -7   58.50    2.60
   3   4  -7   69.40    5.40
  -3   4   7   63.30    2.50
  -3   4   7   57.80    3.20
  -3  -4   7   61.80    2.40
   3  -4  -7   59.80    2.40
   3   4  -6    5.20    0.70
   3   4  -6    4.70    0.80
   3   4  -6    5.00    2.20
  -3   4   6    5.70    0.40
  -3   4   6    3.60    1.50
  -3  -4   6    7.00    0.90
   3  -4  -6    5.50    0.80
   3   4  -5    3.40    0.40
   3   4  -5    3.20    0.60
   3   4  -5    2.30    1.50
  -3   4   5    3.20    0.40
  -3   4   5    2.40    1.40
  -3  -4   5    4.20    0.70
   3  -4  -5    3.50    0.40
   3   4  -4   61.00    2.30
   3   4  -4   59.20    2.40
   3   4  -4   65.10    4.10
  -3   4   4   59.20    2.30
  -3   4   4   64.50    3.80
  -3  -4   4   62.10    2.70
  -3  -4   4   69.50    4.40
   3  -4  -4   61.30    2.30
   3   4  -3  211.40    7.40
   3   4  -3  217.30    9.60
  -3   4   3  205.70    7.50
  -3   4   3  228.30    9.00
  -3  -4   3  214.10    7.60
  -3  -4   3  229.20    9.60
   3  -4  -3  207.20    7.50
   3   4  -2  468.30   15.30
   3   4  -2  499.70   18.50
  -3   4   2  445.20   15.40
  -3   4   2  486.20   18.10
  -3  -4   2  447.70   15.60
  -3  -4   2  467.60   19.50
   3  -4  -2  451.00   15.40
   3   4  -1   17.40    1.00
   3   4  -1   12.90    2.50
  -3   4   1   17.60    0.90
  -3   4   1   18.80    2.00
  -3  -4   1   17.40    0.90
  -3  -4   1   17.80    2.80
   3  -4  -1   17.90    0.90
   3   4   0  973.80   31.90
   3   4   0 1025.70   36.20
  -3   4   0  965.70   32.50
  -3   4   0 1055.50   37.10
  -3  -4   0  959.40   32.20
  -3  -4   0 1057.40   35.70
   3  -4   0  979.00   32.20
   3   4   1   46.00    2.00
   3   4   1   54.80    3.70
  -3   4  -1   44.10    2.00
  -3   4  -1   48.10    3.30
  -3  -4  -1   48.60    3.20
  -3  -4  -1   49.90    3.30
   3  -4   1   46.00    2.00
   3   4   2  435.20   15.20
   3   4   2  457.30   18.60
  -3   4  -2  409.60   14.60
  -3   4  -2  457.60   17.00
  -3  -4  -2  422.30   14.40
  -3  -4  -2  472.60   18.10
   3  -4   2  421.50   14.60
   3   4   3   12.50    1.00
   3   4   3   10.20    2.50
  -3   4  -3   11.20    0.80
  -3   4  -3   13.40    1.00
  -3   4  -3   10.80    2.10
  -3  -4  -3   12.40    0.90
  -3  -4  -3   17.90    2.60
   3  -4   3   11.50    0.80
   3   4   4  100.50    3.90
   3   4   4  103.90    5.50
  -3   4  -4   98.70    4.30
  -3   4  -4   99.80    3.90
  -3   4  -4  111.50    7.50
  -3  -4  -4   96.90    4.50
  -3  -4  -4  106.80    6.90
   3  -4   4   99.50    3.80
   3   4   5   31.40    1.40
   3   4   5   32.20    3.10
  -3   4  -5   31.40    2.00
  -3   4  -5   31.30    1.50
  -3   4  -5   33.10    3.40
  -3  -4  -5   30.60    1.40
  -3  -4  -5   32.00    2.80
   3  -4   5   30.50    1.30
   3   4   6   24.80    1.20
   3   4   6   24.30    2.60
  -3   4  -6   24.70    1.60
  -3   4  -6   23.90    1.30
  -3   4  -6   27.70    3.50
  -3  -4  -6   25.20    1.20
  -3  -4  -6   28.00    3.10
   3  -4   6   24.60    1.20
   3   4   7    4.50    0.60
   3   4   7    5.20    1.90
  -3   4  -7    4.30    1.00
  -3   4  -7    3.10    0.60
  -3   4  -7    3.90    2.10
  -3  -4  -7    4.30    0.60
  -3  -4  -7    3.20    1.60
   3  -4   7    4.20    0.60
   3   4   8   51.70    2.40
   3   4   8   55.60    2.80
   3   4   8   47.60    3.70
  -3   4  -8   50.50    2.70
  -3   4  -8   48.00    2.50
  -3   4  -8   57.80    5.10
  -3  -4  -8   51.80    2.30
  -3  -4  -8   52.90    3.80
   3  -4   8   52.70    2.60
   3   4   9   22.00    1.30
   3   4   9   25.90    2.00
   3   4   9   20.70    2.70
  -3   4  -9   27.90    1.70
  -3   4  -9   22.50    1.60
  -3   4  -9   30.30    3.90
  -3  -4  -9   24.20    1.50
  -3  -4  -9   28.50    3.40
   3  -4   9   24.70    1.60
   3   4  10   15.10    0.90
   3   4  10   17.70    1.60
  -3   4 -10   15.50    1.20
  -3   4 -10   14.80    3.40
  -3  -4 -10   16.80    1.00
  -3  -4 -10   18.80    2.40
   3  -4  10   15.20    0.90
   3   4  11    7.00    0.50
   3   4  11    8.30    1.00
  -3   4 -11    7.60    1.00
  -3   4 -11    3.50    3.20
  -3  -4 -11    8.30    0.60
   3  -4  11    6.40    0.80
   3   4  12   73.30    3.50
  -3   4 -12   61.80    5.30
   3  -4  12   62.50    2.70
   3   4  13    1.10    0.90
   3   4  14   36.50    2.40
   3   4  15    3.40    1.80
   3   4  16   22.80    3.00
  -3   5  16    9.10    2.40
  -3   5  15    1.10    1.60
  -3   5  14   66.00    3.80
   3   5 -13   15.80    1.10
  -3   5  13   16.00    2.00
   3   5 -12   45.70    2.40
   3   5 -12   45.70    2.30
   3   5 -12   52.00    4.10
  -3   5  12   43.00    2.50
   3   5 -11   16.20    1.00
   3   5 -11   15.10    1.00
   3   5 -11   10.50    2.80
  -3   5  11   13.40    2.20
   3   5 -10   24.10    1.30
   3   5 -10   25.90    1.40
   3   5 -10   21.20    1.60
   3   5 -10   22.50    3.30
  -3   5  10   24.10    2.40
   3   5  -9   95.20    3.80
   3   5  -9  102.80    4.40
   3   5  -9   97.70    4.20
   3   5  -9   95.70    5.90
  -3   5   9   99.90    3.70
  -3   5   9   99.10    4.20
  -3   5   9   95.10    4.40
   3  -5  -9   97.60    3.70
   3   5  -8    5.90    0.80
   3   5  -8    4.90    0.50
   3   5  -8    4.40    1.00
   3   5  -8    4.10    2.80
  -3   5   8    5.90    0.40
  -3   5   8    3.90    1.30
  -3  -5   8    5.20    0.50
   3  -5  -8    6.70    0.40
   3   5  -7   86.20    3.20
   3   5  -7   89.50    3.40
   3   5  -7   91.10    5.40
  -3   5   7   87.00    3.40
  -3   5   7   82.50    4.50
  -3  -5   7   86.50    3.30
   3  -5  -7   83.00    3.20
   3   5  -6   -0.10    0.60
   3   5  -6   -0.10    0.60
   3   5  -6    0.50    2.40
  -3   5   6    0.60    0.30
  -3   5   6   -0.50    1.50
  -3  -5   6    0.30    0.50
   3  -5  -6    0.30    0.70
   3   5  -5   23.40    1.20
   3   5  -5   24.20    1.30
   3   5  -5   22.70    2.80
  -3   5   5   25.80    1.20
  -3   5   5   25.10    2.60
  -3  -5   5   24.70    1.10
   3  -5  -5   25.90    1.20
   3   5  -4   78.40    3.00
   3   5  -4   83.60    3.20
   3   5  -4   83.90    5.10
  -3   5   4   79.00    3.30
  -3   5   4   75.00    4.20
  -3  -5   4   80.10    3.10
   3  -5  -4   77.30    3.00
   3   5  -3    2.90    0.60
   3   5  -3    1.80    2.00
  -3   5   3    2.40    0.40
  -3   5   3    2.40    1.30
  -3  -5   3    2.50    0.50
  -3  -5   3    2.80    1.70
   3  -5  -3    2.20    0.50
   3   5  -2  207.90    7.30
   3   5  -2  208.90    9.70
  -3   5   2  205.70    7.40
  -3   5   2  218.30    9.00
  -3  -5   2  201.30    7.10
  -3  -5   2  222.90    9.00
   3  -5  -2  207.20    7.00
   3   5  -1   51.80    2.50
   3   5  -1   49.80    3.80
  -3   5   1   51.80    2.20
  -3   5   1   50.80    3.50
  -3  -5   1   51.70    2.20
  -3  -5   1   55.70    3.80
   3  -5  -1   51.90    2.00
   3   5   0   44.50    1.80
   3   5   0   45.50    3.20
  -3   5   0   44.60    1.90
  -3   5   0   48.20    3.50
  -3  -5   0   43.20    2.00
  -3  -5   0   47.90    3.10
   3  -5   0   43.00    1.90
   3   5   1  852.70   28.00
   3   5   1  895.40   33.10
  -3   5  -1  826.50   27.90
  -3   5  -1  935.20   31.70
  -3  -5  -1  831.70   28.00
  -3  -5  -1  928.70   32.00
   3  -5   1  831.20   27.90
   3   5   2  126.80    4.70
   3   5   2  130.70    6.60
  -3   5  -2  125.60    4.70
  -3   5  -2  131.00    6.60
  -3  -5  -2  125.70    4.60
  -3  -5  -2  138.50    6.30
   3  -5   2  127.80    4.70
   3   5   3   11.20    0.70
   3   5   3    9.20    1.60
  -3   5  -3   11.10    0.80
  -3   5  -3    9.20    2.20
  -3  -5  -3   11.30    0.80
  -3  -5  -3    8.90    2.80
   3  -5   3   12.00    1.00
   3   5   4  382.30   13.60
   3   5   4  395.40   17.80
  -3   5  -4  348.00   12.80
  -3   5  -4  377.90   13.70
  -3   5  -4  388.40   15.60
  -3  -5  -4  354.00   12.10
  -3  -5  -4  390.80   16.00
   3  -5   4  370.00   12.90
   3   5   5   46.70    2.40
   3   5   5   40.00    3.80
  -3   5  -5   43.60    2.00
  -3   5  -5   43.40    1.90
  -3   5  -5   48.50    4.20
  -3  -5  -5   42.70    1.90
  -3  -5  -5   47.40    3.20
   3  -5   5   43.40    2.40
   3   5   6  232.90    8.30
   3   5   6  239.30   11.80
  -3   5  -6  219.90    8.40
  -3   5  -6  233.20    8.70
  -3   5  -6  244.50   11.00
  -3  -5  -6  230.00    8.10
  -3  -5  -6  252.00   10.00
   3  -5   6  230.10    8.50
   3   5   7   38.60    1.70
   3   5   7   30.70    3.00
  -3   5  -7   37.90    1.90
  -3   5  -7   37.20    2.20
  -3   5  -7   32.90    4.30
  -3  -5  -7   40.20    2.30
  -3  -5  -7   43.00    3.70
   3  -5   7   38.80    1.90
   3   5   8    8.40    0.70
   3   5   8    6.30    2.10
  -3   5  -8    8.70    1.00
  -3   5  -8    7.40    0.90
  -3   5  -8    6.90    2.50
  -3  -5  -8    8.70    0.80
  -3  -5  -8    6.30    2.10
   3  -5   8    8.80    0.90
   3   5   9   65.00    3.00
   3   5   9   73.30    3.70
   3   5   9   66.90    4.30
  -3   5  -9   63.30    3.30
  -3   5  -9   61.10    3.20
  -3   5  -9   77.00    5.40
  -3  -5  -9   69.80    3.20
  -3  -5  -9   69.30    5.20
   3  -5   9   62.60    2.70
   3   5  10    9.20    0.70
   3   5  10   11.20    1.30
   3   5  10    6.60    1.80
  -3   5 -10   19.60    3.30
  -3   5 -10    6.40    1.30
  -3   5 -10    8.10    3.70
  -3  -5 -10    9.60    0.80
   3  -5  10    9.20    0.80
   3   5  11    8.60    0.60
   3   5  11    9.80    1.40
  -3   5 -11    9.50    1.30
  -3   5 -11    7.80    3.40
  -3  -5 -11   10.50    0.90
   3  -5  11    9.70    0.90
   3   5  12   50.70    2.70
  -3   5 -12   62.40    5.50
   3  -5  12   58.10    2.70
   3   5  13   -0.30    1.40
   3   5  14   15.40    1.60
   3   5  15    2.40    1.70
   3   5  16   20.70    2.70
  -3   6  16   19.80    2.90
  -3   6  15   87.30   17.30
  -3   6  14    1.20    1.70
   3   6 -13   32.10    1.80
  -3   6  13   35.10    2.20
   3   6 -12    3.30    0.90
   3   6 -12    3.90    0.70
   3   6 -12    3.20    3.10
  -3   6  12    5.30    1.60
   3   6 -11   15.60    1.00
   3   6 -11   16.20    1.10
   3   6 -11   17.50    3.70
  -3   6  11   18.00    2.00
   3   6 -10   32.90    1.80
   3   6 -10   32.60    1.70
   3   6 -10   35.40    3.60
  -3   6  10   39.50    3.20
   3   6  -9   -0.60    0.60
   3   6  -9    0.00    0.70
   3   6  -9   -0.30    0.70
   3   6  -9    1.40    2.70
  -3   6   9    0.10    0.30
  -3   6   9   -0.20    1.00
   3  -6  -9   -0.10    0.30
   3   6  -8    1.90    0.50
   3   6  -8    1.40    0.50
   3   6  -8    1.80    0.90
   3   6  -8    1.20    1.80
  -3   6   8    1.60    0.40
  -3   6   8    2.60    1.70
   3  -6  -8    2.30    0.30
   3   6  -7  136.00    5.00
   3   6  -7  133.10    5.20
   3   6  -7  141.20    7.60
  -3   6   7  137.40    5.10
  -3   6   7  145.00    6.80
  -3  -6   7  140.50    5.20
   3  -6  -7  135.90    4.90
   3   6  -6   12.30    0.90
   3   6  -6   11.70    1.00
   3   6  -6   11.00    3.00
  -3   6   6   14.40    1.20
  -3   6   6    8.50    2.00
  -3  -6   6   12.70    0.90
   3  -6  -6   12.70    0.80
   3   6  -5  124.50    4.60
   3   6  -5  130.90    5.10
   3   6  -5  128.50    7.00
  -3   6   5  125.00    4.50
  -3   6   5  130.50    6.30
  -3  -6   5  124.30    4.40
   3  -6  -5  123.20    4.60
   3   6  -4   41.90    1.80
   3   6  -4   36.70    4.50
  -3   6   4   42.10    1.70
  -3   6   4   43.90    3.10
  -3  -6   4   41.10    1.70
   3  -6  -4   41.90    2.00
   3   6  -3  164.30    6.10
   3   6  -3  166.00    7.90
  -3   6   3  161.20    5.90
  -3   6   3  176.50    7.30
  -3  -6   3  157.50    5.50
   3  -6  -3  158.60    6.20
   3   6  -2  540.40   17.80
   3   6  -2  565.90   20.80
  -3   6   2  563.00   19.90
  -3   6   2  582.70   20.30
  -3  -6   2  519.10   17.70
   3  -6  -2  520.40   17.80
   3   6  -1    7.70    0.60
   3   6  -1    8.60    2.10
  -3   6   1    6.60    0.80
  -3   6   1    6.60    2.40
  -3  -6   1    7.90    0.80
  -3  -6   1    8.70    2.70
   3  -6  -1    7.50    0.60
   3   6   0  828.90   29.20
   3   6   0  876.90   30.00
  -3   6   0  808.00   27.00
  -3   6   0  888.00   31.50
  -3  -6   0  798.70   27.40
  -3  -6   0  862.00   31.30
   3  -6   0  803.70   27.00
   3   6   1    3.70    0.90
   3   6   1    2.60    2.40
  -3   6  -1    2.70    0.70
  -3  -6  -1    3.50    0.70
  -3  -6  -1    5.10    2.70
   3  -6   1    2.20    0.70
   3   6   2  535.50   18.50
   3   6   2  547.40   25.50
  -3   6  -2  510.20   17.50
  -3   6  -2  564.50   20.60
  -3  -6  -2  511.40   18.10
  -3  -6  -2  569.20   19.70
   3  -6   2  529.30   18.00
   3   6   3   74.00    3.00
   3   6   3   76.30    4.60
  -3   6  -3   71.70    2.80
  -3   6  -3   82.50    5.30
  -3  -6  -3   74.10    4.00
  -3  -6  -3   86.10    5.40
   3  -6   3   71.70    2.90
   3   6   4   89.80    3.80
   3   6   4   92.40    4.90
  -3   6  -4   81.90    3.40
  -3   6  -4   83.90    3.50
  -3   6  -4   95.60    9.50
  -3  -6  -4   86.00    4.50
  -3  -6  -4  101.40    7.50
   3  -6   4   88.30    3.40
   3   6   5    0.20    0.40
   3   6   5    0.60    1.30
  -3   6  -5    5.90    1.90
  -3   6  -5    0.80    0.40
  -3   6  -5   -2.50    3.00
  -3  -6  -5    0.40    0.40
  -3  -6  -5    1.10    1.70
   3  -6   5    2.20    0.70
   3   6   6    0.70    0.50
   3   6   6   -0.40    1.50
  -3   6  -6    1.00    0.50
  -3   6  -6    0.20    0.60
  -3   6  -6    1.90    2.90
  -3  -6  -6    1.00    0.50
  -3  -6  -6    1.20    2.40
   3  -6   6    1.30    0.80
   3   6   7   70.60    3.00
   3   6   7   70.70    4.20
  -3   6  -7   70.50    2.90
  -3   6  -7   73.80    3.10
  -3   6  -7   68.70    5.70
  -3  -6  -7   71.20    3.80
  -3  -6  -7   70.30    5.40
   3  -6   7   71.30    3.10
   3   6   8    7.20    0.60
   3   6   8    4.60    2.00
  -3   6  -8    8.00    0.90
  -3   6  -8    6.10    1.00
  -3   6  -8   11.00    3.80
  -3  -6  -8    7.80    0.80
   3  -6   8    7.00    0.80
   3   6   9   35.90    1.70
   3   6   9   38.50    2.00
   3   6   9   34.70    3.50
  -3   6  -9   39.40    2.50
  -3   6  -9   33.70    1.90
  -3   6  -9   45.50    4.90
  -3  -6  -9   38.80    1.80
   3  -6   9   36.60    1.90
   3   6  10    5.70    0.60
   3   6  10    6.40    0.90
   3   6  10    5.30    1.70
  -3   6 -10    7.00    1.00
  -3   6 -10    4.90    1.20
  -3   6 -10    6.90    3.50
  -3  -6 -10    7.40    0.70
   3  -6  10    6.80    0.80
   3   6  11    0.50    0.30
   3   6  11    1.10    1.10
  -3   6 -11    0.90    0.80
  -3   6 -11    2.10    3.70
   3  -6  11    0.90    0.80
   3   6  12   26.60    2.20
  -3   6 -12   20.20    4.00
   3  -6  12   21.60    1.30
   3   6  13    5.70    1.20
   3   6  14    9.90    1.70
   3   6  15   31.60    2.30
  -3   7  15   79.60   16.80
  -3   7  14   -0.70    1.90
   3   7 -13    1.10    0.80
  -3   7  13    1.90    1.20
   3   7 -12    7.80    0.90
   3   7 -12    7.70    3.80
  -3   7  12    7.70    1.70
   3   7 -11   25.30    1.50
   3   7 -11   27.70    1.60
   3   7 -11   23.50    4.20
  -3   7  11   25.10    1.80
   3   7 -10   71.00    3.10
   3   7 -10   72.40    3.20
   3   7 -10   75.20    5.50
  -3   7  10   75.70    2.70
  -3   7  10   79.90    2.70
  -3   7  10   77.80    3.50
  -3   7  10   70.10    3.20
   3   7  -9   27.10    1.60
   3   7  -9   27.90    1.50
   3   7  -9   27.20    1.60
   3   7  -9   22.70    4.50
  -3   7   9   27.90    1.20
  -3   7   9   24.00    2.20
   3  -7  -9   28.60    1.30
   3   7  -8   36.80    1.80
   3   7  -8   37.50    1.90
   3   7  -8   37.90    1.70
   3   7  -8   32.90    4.50
  -3   7   8   37.70    1.60
  -3   7   8   39.60    3.00
   3  -7  -8   38.30    1.60
   3   7  -7    4.00    0.80
   3   7  -7    5.00    1.10
   3   7  -7    5.50    3.10
  -3   7   7    4.70    0.50
  -3   7   7    2.10    1.90
  -3  -7   7    5.30    0.90
   3  -7  -7    4.40    0.50
   3   7  -6    7.40    0.70
   3   7  -6    6.70    0.90
   3   7  -6    4.90    2.50
  -3   7   6    7.50    0.60
  -3   7   6    5.70    2.20
  -3  -7   6    6.90    0.70
   3  -7  -6    7.60    0.60
   3   7  -5  114.60    4.30
   3   7  -5  107.70    5.10
   3   7  -5  121.00    6.70
  -3   7   5  126.00    5.20
  -3   7   5  126.50    6.90
  -3  -7   5  111.30    4.20
   3  -7  -5  116.40    4.50
   3   7  -4   -0.30    1.40
   3   7  -4    0.20    2.70
  -3   7   4   -0.30    0.50
  -3   7   4    0.40    1.40
  -3  -7   4    0.00    0.40
   3  -7  -4    0.10    0.30
   3   7  -3  168.20    6.00
   3   7  -3  179.40    7.80
  -3   7   3  171.40    6.60
  -3   7   3  185.90    8.00
  -3  -7   3  162.60    5.70
   3  -7  -3  166.20    6.00
   3   7  -2   45.40    2.10
   3   7  -2   47.10    4.40
  -3   7   2   42.60    1.80
  -3  -7   2   42.30    1.90
   3  -7  -2   43.80    1.70
   3   7  -1  970.90   30.30
   3   7  -1  995.90   35.20
  -3   7   1  939.50   30.60
  -3  -7   1  930.30   30.60
   3  -7  -1  939.00   30.90
   3   7   0   37.90    1.90
   3   7   0   31.10    3.80
  -3   7   0   35.70    1.60
  -3  -7   0   35.70    1.60
   3  -7   0   37.00    1.60
   3   7   1  773.30   24.90
   3   7   1  821.90   29.90
  -3   7  -1  751.70   25.50
  -3  -7  -1  749.40   26.50
   3  -7   1  770.50   25.30
   3   7   2    9.60    2.10
  -3   7  -2    8.70    0.70
  -3  -7  -2    8.00    0.70
  -3  -7  -2    7.30    2.00
   3  -7   2    7.10    0.80
   3   7   3  751.60   25.00
   3   7   3  768.70   34.70
  -3   7  -3  740.40   24.50
  -3  -7  -3  715.30   25.10
  -3  -7  -3  764.00   29.50
   3  -7   3  742.00   27.80
   3   7   4   70.20    2.70
   3   7   4   69.40    4.80
  -3   7  -4   67.00    3.00
  -3  -7  -4   67.70    2.80
  -3  -7  -4   67.50    5.20
   3  -7   4   71.30    3.50
   3   7   5    4.60    0.90
   3   7   5    4.90    2.50
  -3   7  -5    3.80    0.70
  -3   7  -5    4.80    0.70
  -3   7  -5    2.90    2.50
  -3  -7  -5    4.70    0.70
   3  -7   5    4.40    0.60
   3   7   6   37.10    1.70
   3   7   6   32.40    3.10
  -3   7  -6   33.50    1.80
  -3   7  -6   35.00    1.60
  -3   7  -6   34.60    3.90
  -3  -7  -6   35.30    1.70
   3  -7   6   34.40    1.60
   3   7   7    4.10    0.60
   3   7   7    2.40    2.10
  -3   7  -7    4.10    0.80
  -3   7  -7    2.20    0.60
  -3   7  -7    4.00    2.50
  -3  -7  -7    4.10    0.70
   3  -7   7    3.70    0.70
   3   7   8    1.30    0.50
   3   7   8    0.50    2.10
  -3   7  -8    1.20    0.60
  -3   7  -8    0.50    1.00
  -3   7  -8    1.40    3.50
  -3  -7  -8    1.70    1.50
   3  -7   8    0.20    0.80
   3   7   9   28.60    1.30
   3   7   9   26.90    2.80
  -3   7  -9   31.70    2.90
  -3   7  -9   26.90    1.80
  -3   7  -9   39.70    6.80
  -3  -7  -9   28.40    1.70
   3  -7   9   28.40    1.80
   3   7  10   27.00    1.40
   3   7  10   25.30    1.70
   3   7  10   16.00    2.60
  -3   7 -10   26.30    1.80
  -3   7 -10   35.30    5.60
  -3  -7 -10   24.90    1.40
   3  -7  10   21.80    1.40
   3   7  11   -0.30    0.40
   3   7  11   -0.20    0.80
   3   7  11   -0.60    1.40
  -3   7 -11    0.10    0.90
  -3   7 -11    2.30    4.70
   3  -7  11    0.20    0.50
   3   7  12   33.90    2.40
  -3   7 -12   38.20    6.70
   3  -7  12   30.30    1.70
   3   7  13    0.40    1.20
   3   7  14    0.70    1.70
   3   7  15   10.20    2.10
  -3   8  15   12.60    1.80
  -3   8  14    2.50    2.10
   3   8 -13   90.00    3.80
  -3   8  13   93.70    4.90
   3   8 -12   13.20    1.10
   3   8 -12   13.30    1.30
   3   8 -12   13.80    4.00
  -3   8  12   13.60    1.60
   3   8 -11   23.20    1.30
   3   8 -11   27.50    2.10
   3   8 -11   24.20    3.60
  -3   8  11   26.30    1.90
   3   8 -10   76.70    3.40
   3   8 -10   87.30    3.90
   3   8 -10   85.60    6.70
  -3   8  10   79.80    3.10
  -3   8  10   81.80    3.30
  -3   8  10   70.10    3.70
   3   8  -9    9.60    0.90
   3   8  -9    9.40    1.70
   3   8  -9    8.50    1.30
   3   8  -9    4.70    2.60
  -3   8   9    8.70    0.70
  -3   8   9    9.90    0.70
  -3   8   9    8.20    1.60
   3   8  -8   18.30    1.10
   3   8  -8   17.80    1.30
   3   8  -8   15.30    1.40
   3   8  -8   15.10    3.20
  -3   8   8   21.20    2.20
  -3   8   8   14.40    2.70
   3  -8  -8   17.80    0.90
   3   8  -7  182.50    6.60
   3   8  -7  181.10    6.70
   3   8  -7  185.50    6.90
   3   8  -7  188.20    9.80
  -3   8   7  187.60    6.80
  -3   8   7  194.40    9.10
   3  -8  -7  188.40    6.90
   3   8  -6    3.00    0.80
   3   8  -6    3.90    0.70
   3   8  -6    3.60    3.30
  -3   8   6    3.20    0.60
  -3   8   6    1.60    2.10
  -3  -8   6    3.40    0.80
   3  -8  -6    3.60    0.60
   3   8  -5   98.90    3.70
   3   8  -5   95.60    6.30
  -3   8   5  100.20    3.50
  -3   8   5  100.70    5.80
  -3  -8   5  100.30    3.80
   3  -8  -5   98.70    3.60
   3   8  -4   61.30    2.40
   3   8  -4   66.10    5.50
  -3   8   4   59.30    2.20
  -3   8   4   62.60    4.30
  -3  -8   4   59.20    2.30
   3  -8  -4   62.20    2.50
   3   8  -3   70.80    2.90
   3   8  -3   65.60    5.40
  -3   8   3   66.20    3.00
  -3  -8   3   68.20    2.60
   3  -8  -3   67.90    3.10
   3   8  -2  135.50    4.70
   3   8  -2  145.10    6.70
  -3   8   2  125.70    5.20
  -3  -8   2  128.00    4.50
   3  -8  -2  127.60    4.60
   3   8  -1   27.20    1.40
   3   8  -1   24.50    3.00
  -3   8   1   26.60    1.40
  -3  -8   1   27.10    1.50
   3  -8  -1   28.10    1.40
   3   8   0   26.70    1.30
   3   8   0   26.50    3.30
  -3   8   0   26.20    1.40
  -3  -8   0   26.60    1.30
   3  -8   0   29.70    1.50
   3   8   1   93.70    4.20
   3   8   1   84.80    7.10
  -3   8  -1   88.80    3.40
  -3  -8  -1   88.30    3.40
   3  -8   1   93.80    4.50
   3   8   2    5.10    0.70
   3   8   2   -0.30    3.00
  -3   8  -2    4.80    0.90
  -3  -8  -2    4.10    0.80
   3  -8   2    4.70    0.70
   3   8   3  826.50   27.70
   3   8   3  851.00   36.50
  -3   8  -3  810.10   27.20
  -3  -8  -3  818.90   31.30
   3  -8   3  815.90   27.10
   3   8   4  636.80   20.60
   3   8   4  613.10   26.30
  -3   8  -4  626.10   23.10
  -3  -8  -4  612.10   20.80
   3  -8   4  617.20   22.50
   3   8   5  233.40    8.40
   3   8   5  225.40   11.00
  -3   8  -5  231.40   10.30
  -3   8  -5  230.70    9.40
  -3  -8  -5  223.30    8.30
   3  -8   5  224.40    8.20
   3   8   6   60.20    2.60
   3   8   6   54.20    4.30
  -3   8  -6   63.80    3.70
  -3   8  -6   61.70    2.50
  -3  -8  -6   61.70    2.70
   3  -8   6   61.20    2.70
   3   8   7  369.90   13.50
   3   8   7  348.30   16.60
  -3   8  -7  350.50   13.60
  -3   8  -7  356.40   13.60
  -3   8  -7  399.10   17.90
  -3  -8  -7  370.50   13.60
   3  -8   7  363.40   13.50
   3   8   8    4.90    0.60
   3   8   8    2.20    1.80
  -3   8  -8    3.50    1.00
  -3   8  -8    3.40    0.80
  -3   8  -8    4.40    3.00
  -3  -8  -8    3.60    0.70
   3  -8   8    3.80    0.70
   3   8   9  175.30    7.20
   3   8   9  164.30    9.60
  -3   8  -9  163.80    6.80
  -3   8  -9  172.40    6.80
  -3   8  -9  190.90   11.00
  -3  -8  -9  172.70    7.40
   3  -8   9  165.10    6.20
   3   8  10   29.90    1.40
   3   8  10   17.90    2.80
  -3   8 -10   28.10    1.90
  -3   8 -10   35.80    5.70
  -3  -8 -10   28.40    1.70
   3  -8  10   26.80    1.70
   3   8  11   -0.20    0.90
  -3   8 -11    7.10    2.70
  -3   8 -11    1.30    4.40
   3  -8  11   -0.10    0.60
   3   8  12   18.70    1.50
  -3   8 -12   14.80    5.30
   3  -8  12   17.50    1.40
   3   8  13   19.40    3.40
   3   8  14   11.20    2.20
   3   8  15   18.20    2.00
  -3   9  15    6.00    1.90
  -3   9  14    2.20    1.80
   3   9 -13   31.70    1.90
  -3   9  13   36.00    3.00
   3   9 -12    8.80    1.20
   3   9 -12   11.40    4.70
  -3   9  12    9.80    1.40
   3   9 -11    1.20    1.30
   3   9 -11    0.60    1.10
   3   9 -11    0.10    4.30
   3   9 -10   23.30    1.40
   3   9 -10   23.70    1.50
   3   9 -10   25.80    5.10
  -3   9  10   25.70    1.30
  -3   9  10   25.00    1.30
   3   9  -9   19.60    1.40
   3   9  -9   23.20    1.80
   3   9  -9   18.20    3.70
  -3   9   9   20.80    1.20
  -3   9   9   21.40    1.20
  -3   9   9   16.70    2.40
   3   9  -8   17.00    1.10
   3   9  -8   17.30    1.20
   3   9  -8   16.10    1.10
   3   9  -8   15.90    3.60
  -3   9   8   25.40    1.80
  -3   9   8   16.20    2.80
   3  -9  -8   16.60    0.90
   3   9  -7   90.80    3.50
   3   9  -7   91.30    3.70
   3   9  -7   82.90    3.60
   3   9  -7   82.90    6.40
  -3   9   7   96.70    3.70
  -3   9   7   95.30    5.70
   3  -9  -7   94.90    3.60
   3   9  -6  159.00    6.10
   3   9  -6  160.90    6.20
   3   9  -6  164.90    6.40
   3   9  -6  160.30    8.30
  -3   9   6  166.10    6.20
  -3   9   6  168.20    8.20
  -3  -9   6  166.60    5.70
   3  -9  -6  159.70    5.70
   3   9  -5  264.20    9.60
   3   9  -5  275.60   12.00
  -3   9   5  263.70    8.90
  -3   9   5  270.60   11.00
  -3  -9   5  252.90    9.00
   3  -9  -5  262.10    9.40
   3   9  -4   10.60    1.10
   3   9  -4   10.60    3.80
  -3   9   4   12.90    0.90
  -3  -9   4   11.70    1.10
   3  -9  -4   11.30    0.80
   3   9  -3   70.10    3.30
   3   9  -3   74.40    5.70
  -3   9   3   71.90    2.80
  -3  -9   3   68.80    2.60
   3  -9  -3   69.50    2.60
   3   9  -2  106.40    3.90
   3   9  -2  107.90    6.20
  -3   9   2  104.80    3.80
  -3  -9   2  102.80    3.60
   3  -9  -2  106.50    4.10
   3   9  -1   55.90    2.30
   3   9  -1   56.50    4.20
  -3   9   1   52.90    2.80
  -3  -9   1   54.90    2.30
   3  -9  -1   53.20    2.10
   3   9   0   47.20    1.90
   3   9   0   41.60    4.00
  -3   9   0   45.70    1.80
  -3  -9   0   45.00    2.20
   3  -9   0   45.80    2.30
   3   9   1   64.90    2.50
   3   9   1   64.40    4.80
  -3   9  -1   63.20    2.50
  -3  -9  -1   64.80    3.50
   3  -9   1   64.20    2.50
   3   9   2   24.20    2.10
   3   9   2   18.60    3.20
  -3   9  -2   21.40    1.40
  -3  -9  -2   20.10    1.10
   3  -9   2   21.70    1.20
   3   9   3   26.90    1.40
   3   9   3   24.70    2.90
  -3   9  -3   27.90    1.50
  -3  -9  -3   29.40    1.40
   3  -9   3   27.50    1.50
   3   9   4   14.50    0.90
   3   9   4   10.80    2.80
  -3   9  -4   17.10    1.60
  -3  -9  -4   14.30    1.20
   3  -9   4   17.70    1.30
   3   9   5  131.50    5.10
   3   9   5  132.20    7.80
  -3   9  -5  131.90    5.40
  -3  -9  -5  128.20    4.90
   3  -9   5  131.70    5.20
   3   9   6    9.40    0.90
   3   9   6    8.10    3.00
  -3   9  -6   10.90    1.30
  -3   9  -6   10.70    1.20
  -3  -9  -6   10.20    1.20
   3  -9   6   11.30    1.30
   3   9   7  113.50    4.60
   3   9   7  107.00    6.80
  -3   9  -7  120.00    6.10
  -3   9  -7  112.30    4.70
  -3  -9  -7  112.20    4.50
   3  -9   7  114.10    4.30
   3   9   8   77.90    3.30
   3   9   8   65.90    5.30
  -3   9  -8   74.70    3.50
  -3   9  -8   81.10    3.70
  -3   9  -8   78.90    6.30
  -3  -9  -8   78.20    3.90
   3   9   9    0.40    0.50
   3   9   9    0.70    2.20
  -3   9  -9    1.30    1.10
  -3   9  -9    1.60    2.00
  -3   9  -9   -1.60    5.00
  -3  -9  -9    0.10    0.70
   3  -9   9    0.20    0.80
   3   9  10    5.90    0.60
   3   9  10    2.70    2.30
  -3   9 -10    5.20    1.20
  -3   9 -10    7.70    3.70
   3  -9  10    6.60    1.60
  -3   9 -11    0.20    0.80
  -3   9 -11   -4.30    3.90
   3  -9  11    0.40    1.20
   3   9  12    8.10    1.70
  -3   9 -12    3.00    4.30
   3  -9  12    7.10    1.00
   3   9  13   29.40    2.40
   3   9  14   25.60    2.30
   3   9  15   19.40    2.00
  -3  10  15   18.70    2.80
  -3  10  14    7.30    2.20
   3  10 -13    2.60    0.90
  -3  10  13    2.10    1.60
   3  10 -12    0.00    0.70
   3  10 -12    3.60    6.10
  -3  10  12    1.40    1.30
   3  10 -11   87.70    4.00
   3  10 -11   80.90    4.30
   3  10 -11   85.30    7.30
   3  10 -10    8.20    1.00
   3  10 -10    9.10    1.30
   3  10 -10    7.30    5.40
  -3  10  10    7.80    0.60
  -3  10  10    8.30    1.10
  -3  10  10    4.50    2.20
   3  10  -9   58.60    2.80
   3  10  -9   59.30    2.80
   3  10  -9   59.10    5.20
  -3  10   9   58.50    2.90
  -3  10   9   73.70    3.40
  -3  10   9   52.00    4.30
   3  10  -8   36.20    1.70
   3  10  -8   38.90    1.80
   3  10  -8   35.60    2.20
   3  10  -8   42.20    4.90
  -3  10   8   41.30    2.00
  -3  10   8   29.60    3.60
   3 -10  -8   39.90    1.80
   3  10  -7  261.50    9.00
   3  10  -7  252.50    9.70
   3  10  -7  253.90    9.90
   3  10  -7  279.20   12.80
  -3  10   7  264.30    9.10
  -3  10   7  263.40   13.00
   3 -10  -7  249.00    8.90
   3  10  -6  135.60    5.10
   3  10  -6  138.10    5.80
   3  10  -6  143.50    7.80
  -3  10   6  140.20    5.20
  -3  10   6  137.90    8.20
   3 -10  -6  137.50    5.20
   3  10  -5   20.10    1.40
   3  10  -5   15.50    4.20
  -3  10   5   21.20    1.30
  -3 -10   5   20.30    1.40
   3 -10  -5   18.80    1.20
   3  10  -4   74.20    3.30
   3  10  -4   67.70    6.30
  -3  10   4   72.00    2.70
  -3 -10   4   69.70    2.90
   3 -10  -4   71.30    2.70
   3  10  -3   98.40    3.70
   3  10  -3  100.50    5.90
  -3  10   3   99.00    3.70
  -3 -10   3   98.70    3.80
   3 -10  -3  103.50    3.70
   3  10  -2    1.70    0.60
   3  10  -2    0.90    2.20
  -3  10   2    2.10    0.70
  -3 -10   2    1.30    0.80
   3 -10  -2    1.70    0.80
   3  10  -1  150.10    5.40
   3  10  -1  162.00    8.40
  -3  10   1  151.80    6.30
  -3 -10   1  150.60    5.30
   3 -10  -1  151.50    5.40
   3  10   0  164.20    5.50
   3  10   0  159.70    7.70
  -3  10   0  153.40    5.50
  -3 -10   0  157.10    5.50
   3 -10   0  164.40    6.20
   3  10   1   97.10    3.40
   3  10   1   90.70    6.20
  -3  10  -1   93.30    3.60
  -3 -10  -1   94.70    4.40
   3 -10   1   97.30    3.70
   3  10   2   74.30    4.00
   3  10   2   66.90    5.60
  -3  10  -2   76.70    3.40
  -3 -10  -2   73.10    2.80
   3 -10   2   71.70    2.90
   3  10   3   -0.20    0.70
   3  10   3    3.40    4.00
  -3  10  -3    0.20    0.60
  -3 -10  -3    0.00    0.80
   3 -10   3    0.30    0.80
   3  10   4   27.20    1.90
   3  10   4   26.10    3.70
  -3  10  -4   29.50    2.50
  -3 -10  -4   27.40    2.00
   3 -10   4   26.70    1.40
   3  10   5   28.50    1.60
   3  10   5   25.90    3.30
  -3  10  -5   39.30    5.40
  -3 -10  -5   28.40    1.50
   3 -10   5   28.30    1.50
   3  10   6    0.50    0.70
   3  10   6    0.60    1.80
  -3  10  -6    0.60    0.90
  -3  10  -6    0.50    0.70
  -3 -10  -6    0.10    0.50
   3 -10   6    0.00    0.70
   3  10   7  324.00   11.70
   3  10   7  309.60   14.90
  -3  10  -7  329.80   13.80
  -3  10  -7  323.10   11.80
  -3 -10  -7  311.90   11.60
   3 -10   7  321.60   11.20
   3  10   8   51.10    2.40
   3  10   8   36.30    4.60
  -3  10  -8   46.40    2.60
  -3  10  -8   45.00    2.60
  -3  10  -8   41.50    5.20
  -3 -10  -8   47.10    2.50
   3  10   9  222.50    7.90
   3  10   9  215.10    8.40
   3  10   9  206.20   11.80
  -3  10  -9  209.00    8.00
  -3  10  -9  234.30   12.70
  -3 -10  -9  206.50    8.70
   3 -10   9  209.30    7.70
   3  10  10    2.80    0.60
   3  10  10    0.90    2.40
  -3  10 -10    3.40    0.90
  -3  10 -10    5.50    4.00
   3 -10  10    2.00    1.10
  -3  10 -11   35.20    6.30
   3 -10  11   29.00    1.90
   3  10  12    3.80    1.80
  -3  10 -12    8.60    5.50
   3 -10  12    2.70    1.10
   3  10  13   33.80    2.90
  -3  10 -13   27.40    4.60
   3  10  14    5.90    1.60
  -3  11  15    3.20    1.50
  -3  11  14   12.00    2.30
   3  11 -13   18.00    1.40
  -3  11  13   18.80    2.40
   3  11 -12  116.10    5.20
   3  11 -12  117.10    9.10
   3  11 -11    2.20    1.60
   3  11 -11    1.50    1.40
   3  11 -11    0.50    5.60
   3  11 -10   31.60    2.10
   3  11 -10   30.70    2.30
   3  11 -10   33.50    5.90
  -3  11  10   33.30    1.60
  -3  11  10   24.40    3.10
   3  11  -9   27.50    1.90
   3  11  -9   26.50    1.70
   3  11  -9   31.50    5.60
  -3  11   9   29.00    2.90
  -3  11   9   28.50    1.60
  -3  11   9   16.50    3.10
   3  11  -8  186.40    6.90
   3  11  -8  189.20    7.40
   3  11  -8  192.00   11.40
  -3  11   8  193.60    7.70
  -3  11   8  187.30    9.80
   3 -11  -8  183.00    6.80
   3  11  -7    8.20    1.20
   3  11  -7    7.80    1.20
   3  11  -7    6.50    1.00
   3  11  -7    6.20    3.20
  -3  11   7    9.70    1.00
  -3  11   7    3.20    3.10
   3 -11  -7    8.80    0.80
   3  11  -6  211.90    7.40
   3  11  -6  208.20    8.40
   3  11  -6  206.90   11.40
  -3  11   6  209.80    7.40
   3 -11  -6  205.10    7.30
   3  11  -5   40.00    1.90
   3  11  -5   40.20    1.90
   3  11  -5   35.30    4.80
  -3  11   5   42.20    2.00
   3 -11  -5   42.60    2.00
   3  11  -4    5.40    0.90
   3  11  -4    2.90    2.80
  -3  11   4    5.20    0.80
  -3 -11   4    4.00    1.00
   3 -11  -4    5.40    0.70
   3  11  -3   -0.50    0.70
   3  11  -3    0.50    2.50
  -3  11   3    0.40    0.60
  -3 -11   3    0.50    0.90
   3 -11  -3    0.50    0.60
   3  11  -2   13.20    1.20
   3  11  -2   10.40    3.90
  -3  11   2   11.80    0.90
  -3 -11   2   11.80    1.10
   3 -11  -2   13.40    1.00
   3  11  -1   11.20    0.90
   3  11  -1    8.90    2.60
  -3  11   1   10.90    1.00
  -3 -11   1   10.80    1.20
   3 -11  -1   12.10    1.10
   3  11   0   58.10    2.50
   3  11   0   51.80    4.40
  -3  11   0   58.80    3.10
  -3 -11   0   55.20    2.40
   3 -11   0   55.30    2.50
   3  11   1   45.70    1.80
   3  11   1   39.90    4.00
  -3  11  -1   44.20    3.10
  -3 -11  -1   46.20    2.90
   3 -11   1   47.00    2.30
   3  11   2  161.10    6.30
   3  11   2  160.00    9.00
  -3  11  -2  154.80    5.90
  -3 -11  -2  151.40    5.60
   3 -11   2  155.80    6.10
   3  11   3    8.80    1.00
   3  11   3    6.90    3.60
  -3  11  -3    6.80    0.90
  -3 -11  -3    8.40    1.00
   3 -11   3    8.20    0.90
   3  11   4    0.40    0.70
   3  11   4    0.50    3.30
  -3  11  -4    0.70    0.70
  -3 -11  -4   -0.30    0.90
   3 -11   4    0.50    1.00
   3  11   5    4.20    0.80
   3  11   5    3.70    3.50
  -3  11  -5    5.70    1.40
  -3 -11  -5    2.90    0.70
   3 -11   5    3.90    1.10
   3  11   6    3.20    0.80
   3  11   6    2.00    3.20
  -3  11  -6    3.30    2.00
  -3  11  -6    3.40    0.70
  -3 -11  -6    3.70    0.80
   3 -11   6    3.50    0.90
   3  11   7   32.50    1.60
   3  11   7   25.10    4.00
  -3  11  -7   30.40    2.00
  -3  11  -7   28.50    1.70
  -3 -11  -7   36.50    2.70
   3 -11   7   34.40    2.10
   3  11   8  268.60   10.10
   3  11   8  254.30   13.70
  -3  11  -8  263.50   10.00
  -3 -11  -8  266.40   10.30
   3 -11   8  263.40    9.50
   3  11   9   22.50    1.30
   3  11   9   19.80    1.40
   3  11   9   14.60    3.60
  -3  11  -9   23.20    4.50
   3 -11   9   22.40    1.40
   3  11  10   97.90    4.20
   3  11  10   72.10    5.70
  -3  11 -10   93.20    7.90
   3 -11  10   89.60    3.80
  -3  11 -11    7.30    6.30
   3 -11  11    4.50    2.30
  -3  11 -12    5.10    1.30
  -3  11 -12    8.80    6.90
   3  11  13    9.70    1.90
   3  11  14   51.00    3.40
  -3  12  14   94.80    6.30
   3  12 -13    2.10    0.80
  -3  12  13    0.70    1.30
   3  12 -12   23.80    1.80
   3  12 -12   14.60    7.10
   3  12 -11   -0.10    0.80
   3  12 -11   -0.50    3.90
   3  12 -10    0.40    1.00
   3  12 -10    0.40    1.70
   3  12 -10    5.10    4.40
  -3  12  10    0.40    0.70
  -3  12  10   -1.60    2.70
   3  12  -9    0.40    1.10
   3  12  -9    0.10    1.30
   3  12  -9    1.40    3.50
  -3  12   9    0.50    0.60
  -3  12   9    0.20    0.70
  -3  12   9    0.00    2.80
   3  12  -8    5.00    1.10
   3  12  -8    4.40    1.20
   3  12  -8    1.80    3.80
  -3  12   8    4.80    0.80
  -3  12   8    4.30    0.70
  -3  12   8    2.40    2.10
   3  12  -7   -1.50    1.30
   3  12  -7   -0.10    0.70
   3  12  -7   -2.30    4.90
  -3  12   7    0.70    0.80
  -3  12   7   -2.40    3.50
   3 -12  -7    0.50    0.50
   3  12  -6  255.00    8.90
   3  12  -6  280.80   11.70
   3  12  -6  270.40   13.50
  -3  12   6  264.50    9.10
   3 -12  -6  245.30    8.70
   3  12  -5   11.80    1.30
   3  12  -5   12.20    1.10
   3  12  -5    7.70    4.00
  -3  12   5   12.70    2.00
   3 -12  -5   11.90    0.90
   3  12  -4  264.30    9.70
   3  12  -4  252.90    9.70
   3  12  -4  265.60   14.40
  -3  12   4  269.90    9.40
   3 -12  -4  250.30    8.90
   3  12  -3  137.80    4.90
   3  12  -3  138.90    6.80
   3  12  -3  139.50    8.60
  -3  12   3  138.80    5.00
  -3 -12   3  137.50    5.30
   3 -12  -3  142.80    5.30
   3  12  -2    3.00    1.00
   3  12  -2    2.10    3.00
  -3  12   2    2.30    1.00
  -3 -12   2    2.50    0.80
   3 -12  -2    3.00    0.70
   3  12  -1    1.40    1.10
   3  12  -1    1.10    2.90
  -3  12   1    1.10    0.70
  -3 -12   1    0.50    0.60
   3 -12  -1    1.30    0.90
   3  12   0  249.30   10.60
   3  12   0  236.60   12.80
  -3  12   0  243.10    8.90
  -3 -12   0  239.90   10.20
   3 -12   0  240.50    8.20
   3  12   1    1.40    1.00
   3  12   1    3.50    4.10
  -3  12  -1    2.30    0.80
  -3 -12  -1    1.10    0.70
   3 -12   1    1.50    0.70
   3  12   2   43.50    2.00
   3  12   2   38.80    4.20
  -3  12  -2   43.90    2.00
  -3 -12  -2   44.50    2.00
   3 -12   2   43.80    2.00
   3  12   3  106.60    4.80
   3  12   3  101.60    8.70
  -3  12  -3  108.10    4.70
  -3 -12  -3  102.00    3.90
   3 -12   3  104.60    5.50
   3  12   4   42.30    2.00
   3  12   4   45.20    4.90
  -3  12  -4   40.90    2.30
  -3 -12  -4   44.80    2.80
   3 -12   4   44.60    2.10
   3  12   5   81.10    4.10
   3  12   5   78.40    7.10
  -3  12  -5   76.30    3.60
  -3 -12  -5   75.10    2.90
   3 -12   5   77.30    3.20
   3  12   6  188.80    6.90
   3  12   6  189.70   10.10
  -3  12  -6  178.90    8.30
  -3 -12  -6  181.60    6.90
   3  12   7    3.50    1.20
   3  12   7    3.60    0.80
   3  12   7    1.50    2.40
  -3  12  -7    1.80    0.90
  -3  12  -7    2.10    0.70
  -3 -12  -7    3.40    1.10
   3 -12   7    2.70    1.30
   3  12   8   42.30    1.80
   3  12   8   44.60    2.40
   3  12   8   30.50    3.50
   3 -12   8   41.60    2.10
   3  12   9    1.20    0.80
   3  12   9    1.80    3.10
   3 -12   9    1.20    0.80
   3  12  10    8.00    1.00
  -3  12 -10    9.70    5.10
   3 -12  10    8.70    1.40
  -3  12 -11    2.00    7.00
   3 -12  11    1.60    1.20
  -3  12 -12    5.50    1.10
  -3  12 -12    1.40    7.50
   3  12  13    6.00    1.90
   3  12  14   71.90    5.10
  -3  13  14   27.00    3.20
   3  13 -13    1.00    1.40
   3  13 -12   84.60    4.80
   3  13 -12   76.30    7.50
   3  13 -11    0.00    1.20
   3  13 -11    3.10    6.20
   3  13 -10   39.50    2.20
   3  13 -10   40.50    7.30
  -3  13  10   41.70    2.10
   3  13  -9    0.80    1.50
   3  13  -9    1.10    5.50
  -3  13   9    0.60    0.90
  -3  13   9   -0.10    0.70
  -3  13   9    0.30    3.00
   3  13  -8  143.40    5.90
   3  13  -8  141.80    9.90
  -3  13   8  144.70    5.80
  -3  13   8  153.50    5.50
  -3  13   8  145.50    8.10
   3  13  -7   73.80    3.10
   3  13  -7   68.90    3.40
   3  13  -7   76.50    6.60
  -3  13   7   73.30    2.90
   3 -13  -7   69.80    3.00
   3  13  -6  196.60    7.60
   3  13  -6  195.00    9.20
   3  13  -6  193.90   11.50
  -3  13   6  196.20    7.00
   3 -13  -6  181.00    6.60
   3  13  -5   22.70    1.60
   3  13  -5   22.10    1.60
   3  13  -5   24.40    5.50
  -3  13   5   23.60    1.50
   3 -13  -5   25.10    1.60
   3  13  -4    9.70    1.30
   3  13  -4   11.20    1.00
   3  13  -4    5.90    5.40
  -3  13   4    9.90    1.10
   3 -13  -4   11.50    1.00
   3  13  -3    5.80    1.20
   3  13  -3    5.90    0.90
   3  13  -3    4.30    4.80
  -3  13   3    5.60    1.10
   3 -13  -3    6.10    1.10
   3  13  -2    3.60    0.90
   3  13  -2    2.50    0.90
   3  13  -2    0.30    3.00
  -3  13   2    3.10    0.80
  -3 -13   2    2.40    0.70
   3 -13  -2    1.80    1.00
   3  13  -1   30.40    1.80
   3  13  -1   56.30   11.80
  -3  13   1   29.50    1.80
  -3 -13   1   29.70    2.00
   3 -13  -1   30.50    1.80
   3  13   0    5.80    0.90
   3  13   0    5.10    3.50
  -3  13   0    4.20    1.20
  -3 -13   0    5.50    0.80
   3 -13   0    5.40    1.50
   3  13   1    8.50    0.90
   3  13   1    8.10    3.60
  -3  13  -1    8.60    1.30
  -3 -13  -1    8.80    1.00
   3 -13   1    7.50    1.20
   3  13   2   43.00    2.00
   3  13   2   37.70    5.40
  -3  13  -2   43.20    2.20
  -3 -13  -2   44.90    2.30
   3 -13   2   46.10    2.30
   3  13   3   17.80    1.20
   3  13   3   16.60    6.10
  -3  13  -3   17.10    1.20
  -3 -13  -3   16.00    1.10
   3 -13   3   18.60    1.40
   3  13   4   34.60    2.30
   3  13   4   24.30    4.90
  -3  13  -4   32.70    2.00
  -3 -13  -4   32.50    1.60
   3 -13   4   32.70    2.00
   3  13   5    0.60    0.90
   3  13   5   -2.00    4.20
  -3  13  -5   -0.40    1.20
  -3 -13  -5    0.30    1.00
   3 -13   5    1.10    0.90
   3  13   6    0.90    0.60
   3  13   6    1.60    2.00
   3  13   6    0.00    2.70
   3 -13   6    0.80    0.80
   3  13   7    7.30    1.00
   3  13   7    6.20    1.20
   3  13   7    2.50    4.00
   3 -13   7    7.50    1.10
   3  13   8  113.20    4.60
   3  13   8  106.40    4.70
   3  13   8   92.80    7.10
   3 -13   8  102.30    4.30
   3  13   9   13.30    1.20
   3  13   9    7.80    3.90
   3 -13   9   13.30    1.20
   3  13  10   45.90    2.30
  -3  13 -10   42.40    8.10
   3 -13  10   40.60    2.70
  -3  13 -11   25.40    2.00
  -3  13 -11   18.10    6.40
   3 -13  11   28.20    1.90
  -3  13 -12   12.50    3.70
  -3  13 -12   -4.00    8.00
   3  13  13    4.50    1.70
   3  14 -13   33.30    2.00
   3  14 -12    5.00    1.50
   3  14 -12    4.70    7.10
   3  14 -11   22.80    2.00
   3  14 -11   15.20    5.80
   3  14 -10    5.00    1.00
   3  14 -10   -0.40    4.60
  -3  14  10    4.00    0.80
   3  14  -9   22.80    1.60
   3  14  -9   26.70    5.40
  -3  14   9   22.80    1.40
  -3  14   9   10.80    4.60
   3  14  -8   35.40    2.10
   3  14  -8   39.00    7.30
  -3  14   8   35.60    1.80
  -3  14   8   39.70    2.10
  -3  14   8   31.80    5.10
   3  14  -7   26.80    1.70
   3  14  -7   19.10    5.00
  -3  14   7   29.30    2.30
  -3  14   7   28.90    1.80
   3  14  -6   37.30    2.20
   3  14  -6   42.10    6.90
  -3  14   6   39.60    2.10
   3 -14  -6   39.10    2.40
   3  14  -5   17.50    1.40
   3  14  -5   17.80    5.90
  -3  14   5   22.60    2.50
   3 -14  -5   19.00    1.30
   3  14  -4   44.80    2.10
   3  14  -4   44.00    2.40
   3  14  -4   52.80    5.80
  -3  14   4   46.80    2.10
   3 -14  -4   46.00    2.30
   3  14  -3   84.80    3.30
   3  14  -3   81.20    3.80
   3  14  -3   76.80    8.20
  -3  14   3   88.80    3.60
   3 -14  -3   84.90    3.50
   3  14  -2   -0.70    1.10
   3  14  -2   -0.20    1.10
   3  14  -2   -1.60    4.70
  -3  14   2   -0.20    0.70
   3 -14  -2    0.40    0.70
   3  14  -1   60.80    2.60
   3  14  -1   59.60    2.80
   3  14  -1   53.20    5.40
  -3  14   1   60.00    3.10
   3 -14  -1   59.70    2.70
   3  14   0  557.60   18.80
   3  14   0  548.00   22.50
   3  14   0  575.90   28.20
  -3  14   0  564.60   19.60
   3 -14   0  546.30   18.30
   3  14   1    1.90    0.80
   3  14   1    0.60    0.90
   3  14   1    4.10    3.60
  -3  14  -1    0.00    1.20
  -3 -14  -1    2.10    0.80
   3 -14   1    1.30    0.80
   3  14   2  252.30    8.30
   3  14   2  246.10    9.00
   3  14   2  232.50   12.40
  -3  14  -2  249.10   11.80
  -3 -14  -2  231.50    8.90
   3 -14   2  236.20    8.40
   3  14   3   30.00    1.80
   3  14   3   28.80    1.90
   3  14   3   25.30    6.30
   3 -14   3   27.90    1.70
   3  14   4   53.30    2.30
   3  14   4   52.20    2.60
   3  14   4   51.90    4.90
   3 -14   4   52.50    3.50
   3  14   5    6.90    1.20
   3  14   5    6.30    1.30
   3  14   5    3.50    3.30
   3 -14   5    5.40    1.00
   3  14   6    9.70    1.00
   3  14   6    9.20    1.00
   3  14   6    3.30    3.60
   3 -14   6    9.10    1.10
   3  14   7   59.70    3.30
   3  14   7   59.00    3.00
   3  14   7   41.60    6.00
   3 -14   7   52.90    2.70
   3  14   8    5.40    1.00
   3  14   8    6.70    1.20
   3  14   8   -1.80    4.50
   3 -14   8    7.00    1.20
   3  14   9   49.00    2.40
   3  14   9   32.00    5.50
   3 -14   9   45.10    2.30
  -3  14 -10   30.80    6.70
   3 -14  10   36.40    2.40
  -3  14 -11    6.10    1.80
  -3  14 -11    1.60    6.40
  -3  14 -12   -0.10    1.60
   3  15 -13   36.40    2.80
   3  15 -12   27.20    2.00
   3  15 -12   15.80    6.60
   3  15 -11    1.60    1.20
   3  15 -11   -2.10    5.10
   3  15 -10    4.30    1.10
   3  15 -10    2.20    4.60
   3  15  -9    1.00    1.00
   3  15  -9   -0.80    5.00
  -3  15   9    1.20    0.80
  -3  15   9   -1.40    4.80
   3  15  -8   14.50    1.40
   3  15  -8   16.40    6.80
  -3  15   8   13.70    1.10
  -3  15   8   14.30    1.10
  -3  15   8   12.10    4.40
  -3  15   8   12.10    4.40
   3  15  -7    2.30    1.30
   3  15  -7    3.50    4.90
  -3  15   7    2.50    1.00
  -3  15   7    3.10    1.00
   3  15  -6   22.80    1.80
   3  15  -6   20.10    6.60
  -3  15   6   23.60    1.80
   3 -15  -6   22.80    1.60
   3  15  -5   96.00    4.00
   3  15  -5   90.40    7.80
  -3  15   5   99.00    3.80
   3 -15  -5   95.70    3.60
   3  15  -4   11.00    1.10
   3  15  -4    6.00    4.60
  -3  15   4   10.10    1.10
   3 -15  -4   10.70    1.10
   3  15  -3   -1.10    0.80
   3  15  -3   -3.40    6.00
  -3  15   3    0.50    0.90
   3 -15  -3    0.00    0.70
   3  15  -2  111.40    5.10
   3  15  -2   99.10    8.10
  -3  15   2  109.30    5.10
   3 -15  -2  102.00    4.20
   3  15  -1   10.80    1.10
   3  15  -1    8.90    4.50
  -3  15   1    9.10    1.10
   3 -15  -1   11.00    1.40
   3  15   0   21.30    1.80
   3  15   0   19.30    1.50
   3  15   0   19.90    4.50
  -3  15   0   22.10    1.90
   3 -15   0   20.20    1.40
   3  15   1   93.00    4.70
   3  15   1   83.30    3.90
   3  15   1   76.30    7.70
   3 -15   1   86.00    3.40
   3  15   2   62.50    3.10
   3  15   2   59.50    3.20
   3  15   2   42.40    6.70
   3 -15   2   63.10    2.90
   3  15   3    0.90    0.70
   3  15   3    0.60    0.90
   3  15   3    1.20    3.50
   3 -15   3   -0.60    1.20
   3  15   4   48.10    3.00
   3  15   4   47.10    2.40
   3  15   4   36.50    6.80
   3 -15   4   44.30    2.30
   3  15   5   16.60    1.40
   3  15   5   19.20    1.70
   3  15   5   11.70    4.90
   3 -15   5   19.30    1.90
   3  15   6   35.80    2.00
   3  15   6   33.60    2.40
   3  15   6   16.30    5.60
   3 -15   6   33.10    2.60
   3  15   7   22.80    1.50
   3  15   7   26.20    2.50
   3  15   7   14.10    3.90
   3 -15   7   24.50    5.40
   3  15   8    3.80    1.00
   3  15   8   -5.20    5.50
   3 -15   8    3.90    1.20
   3  15   9    7.30    1.20
   3  15   9    7.20    4.60
   3 -15   9    4.90    1.20
  -3  15 -10    4.80    1.20
   3 -15  10    5.00    1.00
  -3  15 -11    9.70    4.00
  -3  15 -11   -2.50    9.70
  -3  15 -12    3.90    1.40
   3  16 -13  109.90    5.40
   3  16 -12    4.00    1.30
   3  16 -11    1.20    1.70
   3  16 -11   -0.90    6.30
   3  16 -10    0.30    1.50
   3  16 -10    0.60    5.30
   3  16  -9    4.00    1.20
   3  16  -9   -0.20    5.40
  -3  16   9    4.00    1.00
  -3  16   9    3.90    4.80
   3  16  -8    0.00    1.00
   3  16  -8    0.90    7.20
  -3  16   8    0.30    1.00
   3  16  -7   67.70    3.30
   3  16  -7   55.60    7.40
  -3  16   7   64.90    3.00
  -3  16   7   75.80    4.00
   3  16  -6    1.50    1.50
   3  16  -6   -4.10    7.00
  -3  16   6    0.60    0.70
  -3  16   6    1.30    0.90
   3  16  -5   40.60    2.30
   3  16  -5   32.60    5.90
  -3  16   5   40.90    2.30
   3 -16  -5   41.20    2.40
   3  16  -4    8.70    1.30
   3  16  -4    6.70    4.50
  -3  16   4   10.20    1.50
   3 -16  -4   10.90    1.10
   3  16  -3   10.90    1.20
   3  16  -3    9.10    5.30
   3 -16  -3   11.10    1.10
   3  16  -2   10.30    1.60
   3  16  -2   10.40    6.00
   3 -16  -2   10.10    1.40
   3  16  -1   22.20    1.50
   3  16  -1   15.90    4.50
   3 -16  -1   21.60    1.60
   3  16   0   19.70    3.10
   3  16   0   13.80    6.30
   3  16   1   53.60    2.90
   3  16   1   47.50    8.40
   3 -16   1   55.50    3.50
   3  16   2    4.40    1.30
   3  16   2    8.90    6.00
   3 -16   2    7.50    1.50
   3  16   3   97.50    3.80
   3  16   3   77.80    7.10
   3 -16   3   96.00    3.90
   3  16   4    9.30    1.10
   3  16   4    4.70    3.90
   3 -16   4    7.70    1.90
   3  16   5   29.80    1.70
   3  16   5   20.20    4.70
   3 -16   5   30.80    2.80
   3  16   6    0.30    0.80
   3  16   6    0.60    4.00
   3 -16   6    1.10    1.00
   3  16   7   77.90    4.10
   3  16   7   69.10    6.10
   3 -16   7   77.50    5.90
   3  16   8    5.60    1.20
   3  16   8   -4.70    5.30
   3 -16   8    4.20    1.60
   3  16   9   15.50    1.40
  -3  16  -9   14.70    1.70
   3 -16   9   13.00    1.40
  -3  16 -10   10.50    1.70
  -3  16 -11    2.40    2.00
  -3  16 -12    0.60    1.80
   3  17 -13    3.30    1.30
   3  17 -12   -0.70    1.80
   3  17 -11   47.10    6.20
   3  17 -10   13.10    2.20
   3  17  -9    0.50    1.40
   3  17  -9    2.30    6.30
  -3  17   9    0.00    1.10
   3  17  -8    4.20    1.80
   3  17  -8    3.80    8.20
  -3  17   8    4.90    1.20
   3  17  -7    2.60    1.70
   3  17  -7    2.50    5.80
  -3  17   7    6.60    2.20
   3  17  -6   21.40    2.00
   3  17  -6   13.80    8.30
  -3  17   6   20.40    1.60
   3  17  -5   57.40    2.80
   3  17  -5   48.60    7.00
  -3  17   5   56.00    3.40
   3  17  -4   22.30    1.60
   3  17  -4   15.30    5.30
   3 -17  -4   21.00    1.70
   3  17  -3    6.90    1.10
   3  17  -3    6.70    7.20
   3 -17  -3    6.00    1.40
   3  17  -2   13.50    1.70
   3  17  -2    4.60    6.60
   3 -17  -2   13.50    1.50
   3  17  -1  152.50    5.60
   3  17  -1  141.20   10.30
   3 -17  -1  149.80    5.60
   3  17   0   30.50    2.40
   3  17   0   23.90    7.10
   3 -17   0   31.70    1.80
   3  17   1  400.50   14.40
   3  17   1  382.10   21.70
   3 -17   1  395.10   13.90
   3  17   2   39.30    2.20
   3  17   2   22.10    7.10
   3 -17   2   39.90    2.50
   3  17   3   29.80    2.40
   3  17   3   16.00    6.40
   3 -17   3   27.80    1.90
   3  17   4   28.50    1.70
   3  17   4   21.80    4.50
   3 -17   4   31.10    1.90
   3  17   5    1.80    1.10
   3  17   5    1.70    6.10
   3 -17   5    2.40    2.00
   3  17   6   22.10    1.80
   3  17   6    2.90    7.00
   3 -17   6   19.10    1.90
   3  17   7    4.30    2.20
   3  17   7    2.00    5.50
   3 -17   7    1.10    1.10
   3  17   8    2.90    0.80
   3  17   8    4.60    4.10
   3 -17   8    2.20    1.70
   3  17   9   14.40    1.30
  -3  17  -9   13.20    2.00
  -3  17 -10    4.30    2.00
  -3  17 -11    3.40    1.50
  -3  17 -12   -0.50    2.10
   3  18 -13   81.40   11.90
   3  18 -12   26.30    2.60
   3  18 -11   67.90    4.20
   3  18 -10   12.40    2.50
   3  18  -9    7.90    1.40
  -3  18   9    7.70    1.10
   3  18  -8    8.90    1.80
  -3  18   8    6.90    1.40
   3  18  -7   73.80    6.00
   3  18  -7   64.50    7.80
  -3  18   7   75.30    4.60
   3  18  -6    8.10    1.80
   3  18  -6    8.10    8.60
  -3  18   6    8.70    1.20
   3  18  -5   25.60    6.40
   3  18  -5   10.80    8.10
  -3  18   5   15.80    1.70
   3  18  -4   26.80    2.00
   3  18  -4   20.30    7.80
  -3  18   4   27.90    2.10
   3  18  -3   15.70    1.90
   3  18  -3   14.70    7.90
   3 -18  -3   15.20    1.70
   3  18  -2   38.30    2.50
   3  18  -2   31.90    6.20
   3 -18  -2   35.50    2.00
   3  18  -1   19.10    2.20
   3  18  -1   10.00    5.20
   3 -18  -1   19.00    1.80
   3  18   0  103.70    4.40
   3  18   0   92.60    8.50
   3 -18   0  100.10    4.50
   3  18   1   35.80    2.40
   3  18   1   34.70    7.60
   3 -18   1   34.10    2.30
   3  18   2   83.10    3.90
   3  18   2   63.70    8.50
   3 -18   2   78.00    3.80
   3  18   3   30.80    2.50
   3  18   3   12.50    7.00
   3 -18   3   29.90    2.00
   3  18   4    0.00    1.00
   3  18   4    2.90    4.50
   3 -18   4   -0.30    1.20
   3  18   5    0.50    1.20
   3  18   5   -1.10    6.60
   3 -18   5    0.20    2.00
   3  18   6    2.40    0.90
   3  18   6   -5.80    7.70
   3 -18   6    2.20    1.50
   3  18   7   77.00    3.50
   3  18   7   59.60    7.50
  -3  18  -7   84.80    4.60
   3 -18   7   73.10    3.70
   3  18   8    0.30    1.20
   3  18   8    6.10    6.90
  -3  18  -8    7.60    3.80
  -3  18  -9   49.70    3.80
  -3  18 -10    0.80    2.00
  -3  18 -11    1.20    2.30
  -3  18 -12    1.50    1.80
   3  19 -12   13.90    2.40
   3  19 -11    1.30    2.10
   3  19 -10    2.30    2.00
   3  19  -9    9.30    1.70
   3  19  -8    3.00    1.90
  -3  19   8    3.10    1.30
   3  19  -7    7.30    2.10
  -3  19   7    7.40    1.40
   3  19  -6   33.00    2.90
  -3  19   6   27.00    1.80
   3  19  -5   36.40    2.80
  -3  19   5   33.70    2.30
   3  19  -4   28.40    2.50
   3  19  -4   21.30    8.40
  -3  19   4   28.30    2.30
   3  19  -3    5.70    2.00
   3  19  -3   -2.60    6.90
  -3  19   3    4.10    1.70
   3  19  -2   15.10    1.50
   3  19  -2    4.30    5.30
  -3  19   2   16.50    1.40
   3 -19  -2   15.30    1.70
   3  19  -1    0.20    1.00
   3  19  -1   -2.30    7.30
   3 -19  -1   -0.20    1.50
   3  19   0   10.60    1.70
   3  19   0    8.20    5.40
   3 -19   0   13.00    1.40
   3  19   1   32.80    2.70
   3  19   1   25.50    8.10
   3 -19   1   30.10    2.00
   3  19   2   32.90    5.00
   3  19   2    8.10    7.90
   3 -19   2   27.70    2.30
   3  19   3    2.70    1.60
   3  19   3    7.80    7.50
   3 -19   3    2.70    1.20
   3  19   4   65.40    3.10
   3  19   4   45.80    6.90
   3 -19   4   61.40    3.20
   3  19   5   15.60    1.60
   3  19   5   21.40    7.20
   3 -19   5   16.40    2.20
   3  19   6   23.20    1.80
   3  19   6    5.50    6.80
  -3  19  -6   21.70    1.90
   3 -19   6   21.30    2.00
   3  19   7   39.40    2.20
   3  19   7   21.60    6.30
  -3  19  -7   41.70    3.00
   3  19   8   11.70    1.70
  -3  19  -8   12.00    2.40
  -3  19  -9    4.60    2.30
  -3  19 -10    2.60    2.10
  -3  19 -11    4.70    2.50
  -3  19 -12    9.90    3.90
   3  20 -12   14.90    2.80
   3  20 -11   18.20    2.50
   3  20 -10    0.50    1.30
   3  20  -9    6.90    1.60
   3  20  -8   11.70    2.20
  -3  20   8   13.10    1.70
   3  20  -7   93.80    4.60
  -3  20   7  104.00    5.50
   3  20  -6   40.40    2.70
  -3  20   6   42.10    2.40
   3  20  -5    2.30    1.90
  -3  20   5   -0.10    1.30
   3  20  -4    0.70    2.00
  -3  20   4    0.20    1.50
   3  20  -3   85.60    3.90
  -3  20   3   81.60    3.80
   3  20  -2   59.60    3.20
  -3  20   2   59.80    3.20
   3  20  -1    2.80    1.60
  -3  20   1    3.60    1.70
   3  20   0  121.00    5.00
   3  20   0   92.00    9.40
  -3  20   0  120.80    5.00
   3 -20   0  120.60    5.40
   3  20   1    0.90    1.90
   3  20   1    3.80    5.60
  -3  20  -1    0.40    1.10
   3 -20   1   -1.40    1.40
   3  20   2   62.60    4.10
   3  20   2   35.30    9.50
  -3  20  -2   60.90    3.40
   3 -20   2   64.00    3.40
   3  20   3    0.60    2.10
   3  20   3   -1.50    7.40
  -3  20  -3   -0.50    1.20
   3 -20   3   -0.60    1.20
   3  20   4   21.30    1.80
   3  20   4   10.80    5.60
  -3  20  -4   23.00    1.80
   3 -20   4   23.60    2.10
   3  20   5   42.30    2.40
   3  20   5   18.70    8.10
  -3  20  -5   46.50    3.20
   3  20   6    5.90    1.70
   3  20   6   -8.00    7.20
  -3  20  -6    6.60    1.90
   3  20   7   -0.10    1.40
   3  20   7    0.80    5.30
  -3  20  -7   -1.20    1.90
   3  20   8    1.40    1.20
  -3  20  -8    1.00    3.60
  -3  20  -9   29.40    3.20
  -3  20 -10    0.60    1.40
   3  21 -10   14.90    1.90
   3  21  -9   -0.90    2.30
   3  21  -8   59.70    5.50
  -3  21   8   52.20    3.10
   3  21  -7   -3.30    1.90
  -3  21   7   -0.10    1.60
   3  21  -6   33.40    2.30
  -3  21   6   35.30    2.30
   3  21  -5   30.30    2.30
  -3  21   5   29.10    2.60
   3  21  -4    3.40    1.40
  -3  21   4    5.70    1.70
   3  21  -3   14.60    1.70
  -3  21   3   16.30    1.90
   3  21  -2   10.10    1.90
  -3  21   2    9.30    1.50
   3  21  -1    9.70    2.10
  -3  21   1   12.90    2.10
   3  21   0    4.20    2.90
  -3  21   0    3.30    1.20
   3  21   1    0.10    1.20
  -3  21  -1   -0.80    1.30
   3  21   2   19.50    2.00
  -3  21  -2   16.30    1.90
   3  21   3   12.50    1.90
  -3  21  -3   13.20    2.20
   3  21   4    0.20    1.30
  -3  21  -4    0.00    1.30
   3  21   5    0.70    1.70
  -3  21  -5    1.50    2.10
   3  21   6   48.40    2.70
  -3  21  -6   45.40    2.90
   3  21   7   38.60    2.50
  -3  21  -7   43.60    3.70
  -3  21  -8  146.50    7.40
  -3  21  -9    4.30    1.60
   3  22  -9   15.90    3.40
   3  22  -8   10.50    2.20
   3  22  -7   13.60    4.70
  -3  22   7   18.60    4.50
   3  22  -6  124.00    6.20
  -3  22   6  118.80    5.60
   3  22  -5   17.40    1.90
  -3  22   5   15.00    2.40
   3  22  -4   78.70    4.50
  -3  22   4   88.40    5.20
   3  22  -3    0.50    2.00
  -3  22   3   -0.60    1.70
   3  22  -2   44.10    3.50
  -3  22   2   42.30    2.80
   3  22  -1   20.60    2.10
  -3  22   1   22.60    2.60
   3  22   0    7.10    1.90
  -3  22   0    5.20    1.30
   3  22   1    3.70    1.40
  -3  22  -1    1.80    1.30
   3  22   2   24.50    2.30
  -3  22  -2   20.60    3.40
   3  22   3    4.90    1.60
  -3  22  -3    5.80    2.60
   3  22   4    4.60    1.50
  -3  22  -4    6.80    2.00
   3  22   5    4.90    1.70
   3  22   6   21.70    1.80
  -3  22  -6   29.00    2.70
   3  22   7   21.60    2.30
  -3  22  -7   23.90    2.90
   3  23  -7   60.70    3.90
  -3  23   7   60.50    3.90
   3  23  -6    4.80    1.70
  -3  23   6    5.90    2.80
   3  23  -5   13.10    2.60
  -3  23   5   13.10    2.50
   3  23  -4    0.80    2.40
  -3  23   4    4.30    2.40
   3  23  -3   28.30    3.80
  -3  23   3   32.00    4.60
   3  23  -1    7.50    2.10
  -3  23   1   36.10    7.50
   3  23   0    2.40    2.00
  -3  23   0    2.90    1.50
   3  23   1    1.00    2.10
  -3  23  -1    1.00    1.40
   3  23   2    1.50    1.50
  -3  23  -2    0.80    1.30
   3  23   3   11.20    1.60
  -3  23  -3   10.60    1.80
   3  23   4   22.60    4.30
  -3  23  -4   17.40    2.10
   3  23   5   69.90    5.20
  -3  23  -5   71.20    4.50
   3  23   6   21.30    2.00
   3  23   7   -0.80    1.90
  -3  24   7   24.00    2.40
  -3  24   6    4.40    2.60
  -3  24   5   22.40    3.50
   3  24  -4    2.70    2.10
  -3  24   4    4.30    2.00
   3  24  -3    0.40    2.60
  -3  24   3    0.90    2.00
   3  24  -2    1.80    2.20
  -3  24   2    4.20    1.70
   3  24  -1    4.80    2.30
  -3  24   1    9.10    2.50
   3  24   0   30.80    2.70
  -3  24   0   35.10    3.20
   3  24   1    0.40    1.50
  -3  24  -1    0.30    1.70
   3  24   2   16.60    2.50
  -3  24  -2   16.70    2.50
   3  24   3    2.40    2.10
  -3  24  -3    3.30    1.90
   3  24   4    1.40    1.90
   3  24   5   30.90    3.80
   3  24   6    2.70    1.50
  -3  25   6   -1.30    2.20
  -3  25   5    7.50    2.80
  -3  25   4   15.40    5.40
  -3  25   3   24.50    3.10
  -3  25   2    8.90    2.00
  -3  25   1   41.20    3.40
   3  25   0    6.20    2.40
  -3  25   0    6.30    1.80
   3  25   1   32.40    2.60
   3  25   2    4.10    2.60
   3  25   3   14.50    2.40
   3  25   4   11.30    1.90
   3  25   5    3.20    1.70
  -4   0  16    0.40    1.40
  -4   0  15    1.70    2.30
  -4   0  14   12.20    3.10
  -4   0  13    0.80    2.50
   4   0 -12   72.40    2.60
   4   0 -12   71.50    2.60
  -4   0  12   68.10    3.60
   4   0 -11   -0.10    0.30
   4   0 -11   -0.10    0.30
   4   0 -11    1.60    1.60
  -4   0  11    0.30    0.90
   4   0 -10   20.90    1.00
   4   0 -10   22.30    2.40
  -4   0  10   22.30    1.00
  -4   0  10   20.20    1.50
   4   0  -9   -0.10    0.40
   4   0  -9    1.50    1.70
  -4   0   9    0.00    0.40
  -4   0   9    0.10    0.70
   4   0  -8    0.80    0.40
   4   0  -8    2.40    2.00
  -4   0   8    0.50    0.40
  -4   0   8    0.70    0.80
  -4   0   8    0.70    1.90
   4   0  -7    0.00    0.40
   4   0  -7   -1.10    1.80
  -4   0   7   -0.40    0.40
  -4   0   7    0.20    0.50
  -4   0   7    0.00    1.90
   4   0  -6   91.00    3.50
   4   0  -6   96.20    5.10
  -4   0   6   91.20    3.50
  -4   0   6   91.50    3.40
  -4   0   6   99.90    5.10
   4   0  -5    0.30    0.50
   4   0  -5    3.40    2.10
  -4   0   5    0.30    0.40
  -4   0   5    0.30    0.50
  -4   0   5   -2.50    2.00
   4   0  -4   41.60    1.80
   4   0  -4   38.50    3.40
  -4   0   4   41.90    1.70
  -4   0   4   40.80    1.70
  -4   0   4   41.20    2.90
   4   0  -3   -0.10    0.30
   4   0  -3    0.60    1.20
  -4   0   3   -0.10    0.50
  -4   0   3    0.30    0.40
  -4   0   3   -2.10    2.10
   4   0  -2   21.00    1.20
   4   0  -2   20.70    2.60
  -4   0   2   21.80    1.20
  -4   0   2   21.50    1.00
  -4   0   2   22.50    2.30
   4   0  -1   -0.60    0.50
   4   0  -1   -1.50    2.00
  -4   0   1    0.40    0.60
  -4   0   1   -0.60    2.10
   4   0   0   19.60    1.00
   4   0   0   15.40    2.50
  -4   0   0   20.40    1.00
  -4   0   0   22.60    2.50
   4   0   1    0.20    0.50
   4   0   1    1.60    2.20
  -4   0  -1    0.10    0.30
  -4   0  -1    0.80    1.50
   4   0   2   65.60    2.80
   4   0   2   64.70    2.50
   4   0   2   66.20    4.60
  -4   0  -2   64.70    3.50
  -4   0  -2   70.60    4.80
   4   0   3    0.80    1.10
   4   0   3    0.00    0.40
   4   0   3   -0.20    2.30
  -4   0  -3    0.20    0.60
  -4   0  -3    1.90    1.70
   4   0   4   16.30    1.10
   4   0   4   16.20    0.90
   4   0   4   12.80    2.30
  -4   0  -4   15.80    1.00
  -4   0  -4   15.30    2.90
   4   0   5   -0.20    0.50
   4   0   5   -0.40    0.40
   4   0   5    0.40    2.10
  -4   0  -5    0.00    0.40
  -4   0  -5    3.10    2.50
   4   0   6    0.50    0.40
   4   0   6    1.30    0.40
   4   0   6   -0.10    1.50
  -4   0  -6    1.00    0.50
  -4   0  -6    0.80    2.60
   4   0   7    0.00    0.40
   4   0   7   -0.60    0.70
   4   0   7    2.10    2.00
  -4   0  -7   -0.30    0.50
  -4   0  -7    1.40    2.50
   4   0   8  339.80   12.20
   4   0   8  328.30   12.20
  -4   0  -8  325.60   12.00
  -4   0  -8  370.00   14.80
   4   0   9    0.60    0.70
   4   0   9    0.20    0.60
  -4   0  -9    0.30    0.60
  -4   0  -9   -2.10    2.80
   4   0  10  224.10    8.40
   4   0  10  217.80    8.70
  -4   0 -10  218.50    9.40
  -4   0 -10  224.60   12.60
   4   0  11   -0.90    0.60
   4   0  11    0.00    1.20
  -4   0 -11    0.10    0.60
  -4   0 -11    1.50    2.70
   4   0  12   54.40    2.60
   4   0  12   60.10    3.20
   4   0  13    0.80    1.30
   4   0  14   20.00    2.40
   4   0  15   -0.40    1.00
   4   0  16    3.10    1.50
  -4   1  16   36.80    3.30
  -4  -1  16   37.40    3.50
  -4   1  15    9.60    1.80
  -4  -1  15   11.40    1.80
  -4   1  14  199.20    9.00
  -4  -1  14  202.40    9.30
  -4   1  13    1.50    1.80
  -4  -1  13    2.90    1.60
   4   1 -12   80.70    3.30
   4   1 -12   79.50    3.10
   4   1 -12   80.80    4.30
  -4   1  12   83.70    3.70
  -4  -1  12   85.80    4.40
   4   1 -11   47.50    2.10
   4   1 -11   46.70    2.30
   4   1 -11   45.00    3.30
  -4   1  11   45.60    2.50
  -4  -1  11   41.20    2.50
   4  -1 -11   46.60    1.90
   4  -1 -11   48.10    2.00
   4   1 -10    2.00    0.40
   4   1 -10    1.10    1.70
  -4   1  10    1.40    0.40
  -4   1  10    0.60    1.20
  -4  -1  10    1.60    0.60
  -4  -1  10    0.80    1.00
   4  -1 -10    1.80    0.50
   4  -1 -10    1.10    1.70
   4   1  -9   22.20    1.20
   4   1  -9   23.30    2.60
  -4   1   9   23.10    1.20
  -4   1   9   21.40    1.50
  -4   1   9   18.30    2.30
  -4  -1   9   25.00    1.30
  -4  -1   9   22.10    1.40
   4  -1  -9   21.90    1.10
   4  -1  -9   24.30    2.50
   4   1  -8   28.40    1.30
   4   1  -8   23.00    2.80
  -4   1   8   27.50    1.50
  -4   1   8   26.40    1.30
  -4   1   8   26.80    2.70
  -4  -1   8   28.90    1.50
  -4  -1   8   25.60    1.30
  -4  -1   8   23.90    2.90
   4  -1  -8   27.10    1.30
   4  -1  -8   33.20    3.60
   4   1  -7   65.20    2.80
   4   1  -7   70.50    4.30
  -4   1   7   66.50    2.80
  -4   1   7   63.30    2.60
  -4   1   7   69.40    4.20
  -4  -1   7   65.30    2.90
  -4  -1   7   64.00    2.60
  -4  -1   7   56.30    4.10
   4  -1  -7   64.40    2.70
   4  -1  -7   71.60    4.30
   4   1  -6   55.30    2.30
   4   1  -6   45.70    2.20
   4   1  -6   57.00    3.70
  -4   1   6   54.30    2.10
  -4   1   6   50.80    2.20
  -4   1   6   55.00    4.00
  -4  -1   6   53.40    2.20
  -4  -1   6   48.60    2.20
  -4  -1   6   53.20    4.10
   4  -1  -6   54.90    2.20
   4  -1  -6   61.30    3.60
   4   1  -5   19.20    1.00
   4   1  -5   22.00    1.20
   4   1  -5   22.00    2.70
  -4   1   5   20.70    1.00
  -4   1   5   21.40    1.10
  -4   1   5   18.10    2.10
  -4  -1   5   19.40    1.10
  -4  -1   5   22.10    1.20
  -4  -1   5   19.20    2.70
   4  -1  -5   18.80    1.10
   4  -1  -5   16.70    2.30
   4   1  -4  368.70   12.80
   4   1  -4  366.50   12.90
   4   1  -4  393.80   15.10
  -4   1   4  368.00   12.90
  -4   1   4  378.60   12.80
  -4   1   4  394.00   16.10
  -4  -1   4  379.30   13.80
  -4  -1   4  383.50   12.80
  -4  -1   4  403.60   16.00
   4  -1  -4  364.40   12.50
   4  -1  -4  386.80   15.30
   4   1  -3  127.20    4.80
   4   1  -3  131.20    4.80
   4   1  -3  129.90    6.50
  -4   1   3  124.30    4.70
  -4   1   3  133.10    4.80
  -4   1   3  138.10    6.20
  -4  -1   3  137.20    6.00
  -4  -1   3  135.80    4.70
  -4  -1   3  136.00    6.90
   4  -1  -3  126.10    5.00
   4  -1  -3  126.20    6.90
   4   1  -2    3.90    0.60
   4   1  -2    3.70    0.30
   4   1  -2    3.20    2.00
  -4   1   2    3.90    0.70
  -4   1   2    3.30    0.30
  -4   1   2    2.20    1.50
  -4  -1   2    5.60    0.90
  -4  -1   2    0.30    2.20
   4  -1  -2    3.70    0.50
   4  -1  -2    2.00    1.50
   4   1  -1   20.00    1.10
   4   1  -1   20.50    0.90
   4   1  -1   20.60    2.60
  -4   1   1   20.60    1.00
  -4   1   1   20.50    0.90
  -4   1   1   20.80    2.40
  -4  -1   1   20.80    1.10
  -4  -1   1   18.80    2.80
   4  -1  -1   20.80    1.10
   4  -1  -1   19.30    2.60
   4   1   0    3.80    0.50
   4   1   0    4.00    1.60
  -4   1   0    3.90    0.50
  -4   1   0    6.50    1.60
  -4  -1   0    3.90    0.50
  -4  -1   0    3.10    1.60
   4  -1   0    4.40    0.50
   4  -1   0    2.00    1.60
   4   1   1    1.70    0.60
   4   1   1    2.70    2.30
  -4   1  -1    1.20    0.40
  -4   1  -1    1.30    1.70
  -4  -1  -1    1.40    0.50
  -4  -1  -1    1.90    1.50
   4  -1   1    1.10    0.60
   4  -1   1    2.50    2.10
   4   1   2  234.00    8.60
   4   1   2  227.20    8.10
   4   1   2  242.90   14.10
  -4   1  -2  225.30   10.00
  -4   1  -2  248.80   13.50
  -4  -1  -2  231.40   10.50
  -4  -1  -2  250.10   12.80
   4  -1   2  237.00    8.70
   4  -1   2  252.50   10.00
   4   1   3   15.60    1.40
   4   1   3   13.90    0.70
   4   1   3   10.90    2.60
  -4   1  -3   14.50    1.00
  -4   1  -3   14.50    2.60
  -4  -1  -3   15.30    0.90
  -4  -1  -3   15.00    2.20
   4  -1   3   15.00    0.80
   4  -1   3   15.70    1.10
   4  -1   3   12.70    2.30
   4   1   4   40.80    1.90
   4   1   4   40.20    1.80
   4   1   4   38.90    3.30
  -4   1  -4   39.40    2.00
  -4   1  -4   40.40    4.30
  -4  -1  -4   39.90    1.80
  -4  -1  -4   47.10    4.00
   4  -1   4   41.10    1.80
   4  -1   4   38.60    1.80
   4  -1   4   41.80    3.50
   4   1   5    3.20    0.50
   4   1   5    3.30    0.40
   4   1   5    2.60    1.60
  -4   1  -5    3.60    0.50
  -4   1  -5   -0.10    1.80
  -4  -1  -5    4.00    0.60
  -4  -1  -5    5.20    2.90
   4  -1   5    4.00    0.60
   4  -1   5    3.20    0.40
   4  -1   5    3.50    2.50
   4   1   6  197.80    7.50
   4   1   6  198.50    7.30
   4   1   6  201.60    9.90
  -4   1  -6  190.90    7.30
  -4   1  -6  218.20    9.70
  -4  -1  -6  203.50    8.30
  -4  -1  -6  210.20    9.60
   4  -1   6  196.80    7.30
   4  -1   6  198.50    7.30
   4  -1   6  195.80    8.90
   4   1   7   17.00    1.00
   4   1   7   17.20    1.10
   4   1   7   15.10    2.50
  -4   1  -7   16.70    1.00
  -4   1  -7   15.60    2.50
  -4  -1  -7   17.70    1.30
  -4  -1  -7   22.00    3.20
   4  -1   7   16.10    1.10
   4  -1   7   16.90    1.20
   4   1   8  164.00    6.10
   4   1   8  163.90    7.00
  -4   1  -8  165.40    6.90
  -4   1  -8  178.10    8.90
  -4  -1  -8  162.30    6.80
  -4  -1  -8  175.10    8.80
   4  -1   8  160.20    6.20
   4  -1   8  155.00    6.50
   4   1   9  101.00    4.10
   4   1   9  106.50    4.70
  -4   1  -9   99.10    4.40
  -4   1  -9  101.20    6.40
  -4  -1  -9  109.20    5.30
  -4  -1  -9  112.70    7.50
   4  -1   9  102.50    4.20
   4  -1   9  101.00    4.40
   4   1  10    5.50    0.60
   4   1  10    6.90    1.10
  -4   1 -10    6.00    0.80
  -4   1 -10    5.00    2.00
  -4  -1 -10    5.70    0.80
  -4  -1 -10    4.70    3.00
   4  -1  10    5.30    0.70
   4  -1  10    5.80    0.80
   4   1  11   42.90    2.10
   4   1  11   42.10    2.30
  -4   1 -11   43.70    2.50
  -4   1 -11   46.30    4.60
  -4  -1 -11   45.60    2.20
  -4  -1 -11   51.00    4.40
   4  -1  11   45.50    2.10
   4  -1  11   41.50    2.30
   4   1  12    8.30    1.40
   4  -1  12    5.40    0.80
   4  -1  12    7.00    1.60
   4   1  13    3.40    1.40
   4  -1  13    4.80    1.20
   4   1  14    4.30    1.90
   4  -1  14    4.90    1.70
   4   1  15    5.80    1.30
   4   1  16   52.70    3.30
  -4   2  15   63.60    4.50
  -4  -2  15   61.80    4.30
  -4   2  14    6.20    3.00
  -4  -2  14    5.50    2.90
  -4   2  13  123.00    6.00
  -4  -2  13  112.90    5.60
   4   2 -12   82.90    3.40
   4   2 -12   85.30    3.40
   4   2 -12   83.40    4.80
  -4   2  12   82.30    3.80
  -4  -2  12   81.20    4.10
   4   2 -11   70.00    3.00
   4   2 -11   68.50    3.00
   4   2 -11   69.20    4.60
  -4   2  11   75.50    3.60
  -4  -2  11   69.50    3.30
   4  -2 -11   67.10    2.60
   4  -2 -11   66.00    2.70
   4   2 -10   17.80    1.10
   4   2 -10   14.20    2.30
  -4   2  10   17.00    0.80
  -4   2  10   16.10    1.60
  -4  -2  10   18.10    1.20
  -4  -2  10   15.20    1.30
   4  -2 -10   17.20    0.90
   4   2  -9    0.30    0.50
   4   2  -9   -0.10    2.10
  -4   2   9    0.50    0.40
  -4   2   9    1.40    1.10
  -4   2   9   -0.50    1.80
  -4  -2   9    0.40    0.50
  -4  -2   9   -0.20    1.00
   4  -2  -9    0.70    0.30
   4  -2  -9   -0.20    1.30
   4   2  -8    2.20    0.50
   4   2  -8    1.60    0.50
   4   2  -8    2.00    2.00
  -4   2   8    2.20    0.40
  -4   2   8    1.60    0.80
  -4   2   8    0.80    1.60
  -4  -2   8    2.30    0.60
  -4  -2   8    1.60    0.80
   4  -2  -8    2.50    0.40
   4  -2  -8    2.50    1.50
   4   2  -7    1.80    0.40
   4   2  -7    1.60    0.70
   4   2  -7    2.50    2.10
  -4   2   7    2.10    0.50
  -4   2   7    1.10    0.60
  -4   2   7    2.00    1.10
  -4  -2   7    2.10    0.40
  -4  -2   7    1.70    0.50
  -4  -2   7    2.10    1.60
   4  -2  -7    1.70    0.50
   4  -2  -7    2.00    1.20
   4   2  -6  284.30   10.00
   4   2  -6  275.70   10.50
   4   2  -6  313.10   13.20
  -4   2   6  285.30   10.50
  -4   2   6  286.60   10.20
  -4   2   6  313.10   13.40
  -4  -2   6  286.90   10.30
  -4  -2   6  290.10   11.20
  -4  -2   6  304.70   12.50
   4  -2  -6  290.90   10.30
   4  -2  -6  313.20   13.00
   4   2  -5   15.80    0.80
   4   2  -5   15.20    0.90
   4   2  -5   16.10    2.20
  -4   2   5   16.70    1.00
  -4   2   5   16.40    0.90
  -4   2   5   12.80    2.40
  -4  -2   5   16.00    0.90
  -4  -2   5   15.60    0.80
  -4  -2   5   15.70    2.20
   4  -2  -5   16.30    1.00
   4  -2  -5   18.20    4.00
   4   2  -4    1.20    0.40
   4   2  -4    1.60    0.30
   4   2  -4    0.70    1.40
  -4   2   4    1.00    0.40
  -4   2   4    1.50    0.70
  -4   2   4    0.70    1.90
  -4  -2   4    1.10    0.40
  -4  -2   4   -0.10    1.40
   4  -2  -4    1.40    0.40
   4  -2  -4    0.40    1.20
   4   2  -3   10.70    0.80
   4   2  -3   10.00    0.60
   4   2  -3    9.80    2.50
  -4   2   3    9.70    0.60
  -4   2   3   10.10    0.60
  -4   2   3    9.90    1.80
  -4  -2   3   10.60    0.70
  -4  -2   3    5.10    2.30
   4  -2  -3   10.70    0.70
   4  -2  -3    8.10    1.60
   4   2  -2   76.80    3.00
   4   2  -2   79.30    3.00
   4   2  -2   83.50    4.90
  -4   2   2   90.60    4.40
  -4   2   2   80.30    4.40
  -4  -2   2   74.80    3.50
  -4  -2   2   78.10    5.00
   4  -2  -2   77.50    3.20
   4  -2  -2   76.40    5.40
   4   2  -1    1.50    0.50
   4   2  -1   -1.40    2.10
  -4   2   1    0.80    0.40
  -4   2   1    0.00    1.40
  -4  -2   1    1.60    0.40
  -4  -2   1    2.00    2.30
   4  -2  -1    1.00    0.50
   4  -2  -1    1.20    1.70
   4   2   0  411.70   13.90
   4   2   0  426.60   16.70
  -4   2   0  404.80   14.00
  -4   2   0  477.70   16.60
  -4  -2   0  400.40   14.10
  -4  -2   0  428.30   16.40
   4  -2   0  410.70   14.70
   4  -2   0  424.80   16.40
   4   2   1  111.10    4.30
   4   2   1  116.50    5.90
  -4   2  -1  110.50    4.20
  -4   2  -1  112.30    4.10
  -4   2  -1  118.70    5.80
  -4  -2  -1  112.40    4.30
  -4  -2  -1  123.80    5.70
   4  -2   1  110.80    4.30
   4  -2   1  117.40    8.00
   4   2   2   30.60    1.50
   4   2   2   26.60    3.40
  -4   2  -2   28.60    1.40
  -4   2  -2   29.50    1.30
  -4   2  -2   31.70    2.70
  -4  -2  -2   30.70    1.50
  -4  -2  -2   31.60    3.60
   4  -2   2   31.00    1.40
   4  -2   2   25.20    3.00
   4   2   3  186.00    7.00
   4   2   3  212.10    9.40
  -4   2  -3  175.20    6.60
  -4   2  -3  181.80    7.00
  -4   2  -3  201.70    8.30
  -4  -2  -3  181.50    6.90
  -4  -2  -3  196.50    7.90
   4  -2   3  184.50    6.60
   4  -2   3  192.10    9.10
   4   2   4  117.00    5.50
   4   2   4  107.00    5.40
   4   2   4  116.00    6.90
  -4   2  -4  107.30    4.40
  -4   2  -4  109.70    4.60
  -4   2  -4  118.40    6.00
  -4  -2  -4  111.50    4.50
  -4  -2  -4  132.70    6.30
   4  -2   4  113.60    4.30
   4  -2   4  106.10    6.80
   4   2   5   97.50    3.90
   4   2   5   97.70    3.70
   4   2   5   98.60    5.70
  -4   2  -5   94.40    3.70
  -4   2  -5  106.90    7.00
  -4  -2  -5   94.30    3.90
  -4  -2  -5  109.10    6.50
   4  -2   5   95.40    3.80
   4   2   6    3.10    0.60
   4   2   6    2.70    0.60
   4   2   6   -3.50    2.10
  -4   2  -6    1.90    0.60
  -4   2  -6    2.70    2.70
  -4  -2  -6    2.50    0.60
  -4  -2  -6    3.80    2.50
   4  -2   6    2.80    0.50
   4  -2   6    2.40    0.60
   4   2   7  289.50   10.40
   4   2   7  282.60   10.50
   4   2   7  289.40   14.80
  -4   2  -7  284.90   11.00
  -4   2  -7  333.50   17.60
  -4  -2  -7  293.50   11.30
  -4  -2  -7  317.60   13.70
   4  -2   7  284.70   10.50
   4  -2   7  278.10   11.50
   4   2   8  118.70    4.60
   4   2   8  121.20    6.60
   4   2   8  119.60    6.80
  -4   2  -8  113.20    4.60
  -4   2  -8  122.30    7.20
  -4  -2  -8  115.80    4.90
  -4  -2  -8  130.90    7.80
   4  -2   8  118.00    4.80
   4  -2   8  116.50    5.20
   4   2   9    9.50    0.80
   4   2   9   10.70    1.00
  -4   2  -9   10.00    1.00
  -4   2  -9    6.30    3.40
  -4  -2  -9   10.90    1.00
  -4  -2  -9    6.80    3.30
   4  -2   9    9.40    0.90
   4  -2   9    9.10    1.00
   4   2  10  144.10    5.40
   4   2  10  141.40    6.00
  -4   2 -10  138.60    5.90
  -4   2 -10  157.00   10.00
  -4  -2 -10  141.60    6.20
  -4  -2 -10  153.90    9.30
   4  -2  10  146.40    5.90
   4  -2  10  129.40    6.40
   4   2  11   58.10    2.50
   4   2  11   58.80    2.80
  -4   2 -11   53.90    2.90
  -4   2 -11   55.70    5.40
  -4  -2 -11   60.50    2.80
  -4  -2 -11   61.00    5.00
   4  -2  11   57.40    2.60
   4  -2  11   58.20    2.90
   4   2  12    1.80    0.90
  -4   2 -12   -0.70    3.20
   4  -2  12    0.80    0.70
   4  -2  12    0.70    0.80
   4   2  13   55.80    2.90
   4   2  14   68.60    3.80
   4   2  15   19.50    2.50
   4   2  16   23.90    2.50
  -4   3  15    5.00    1.80
  -4   3  14    5.70    2.20
  -4   3  13   27.10    1.90
   4   3 -12    3.00    0.50
   4   3 -12    2.20    0.60
   4   3 -12    3.90    2.30
  -4   3  12    3.90    1.00
  -4  -3  12    4.20    1.40
   4   3 -11   86.20    3.60
   4   3 -11   84.80    3.50
   4   3 -11   88.40    5.10
  -4   3  11   89.70    3.90
  -4  -3  11   81.90    4.40
   4   3 -10    2.00    0.50
   4   3 -10    2.60    2.30
  -4   3  10    1.80    0.30
  -4   3  10    2.10    1.30
  -4   3  10    1.40    1.10
  -4  -3  10    2.00    0.60
  -4  -3  10    1.40    0.90
   4  -3 -10    2.00    0.40
   4   3  -9   52.50    2.30
   4   3  -9   51.50    2.70
   4   3  -9   60.10    3.90
  -4   3   9   53.60    2.50
  -4   3   9   50.60    2.30
  -4   3   9   47.50    3.20
  -4  -3   9   54.20    2.40
  -4  -3   9   52.50    2.50
   4  -3  -9   52.30    2.30
   4   3  -8   65.10    2.60
   4   3  -8   66.40    2.80
   4   3  -8   70.30    4.70
  -4   3   8   64.20    2.70
  -4   3   8   65.80    2.70
  -4   3   8   70.70    4.10
  -4  -3   8   69.80    3.00
  -4  -3   8   67.00    2.90
   4  -3  -8   64.10    2.60
   4   3  -7   49.60    2.10
   4   3  -7   48.30    2.40
   4   3  -7   52.80    4.00
  -4   3   7   51.30    2.10
  -4   3   7   49.60    2.40
  -4   3   7   50.30    3.80
  -4  -3   7   52.40    2.00
   4  -3  -7   49.10    2.00
   4  -3  -7   50.30    3.70
   4   3  -6   78.70    3.00
   4   3  -6   77.40    3.30
   4   3  -6   77.50    4.60
  -4   3   6   80.30    3.10
  -4   3   6   78.50    3.10
  -4   3   6   81.40    4.50
  -4  -3   6   79.10    3.50
  -4  -3   6   80.80    4.90
   4  -3  -6   82.00    3.30
   4  -3  -6   82.70    5.20
   4   3  -5   62.90    2.70
   4   3  -5   65.20    2.50
   4   3  -5   67.90    4.40
  -4   3   5   62.00    2.50
  -4   3   5   67.90    2.60
  -4   3   5   65.80    3.90
  -4  -3   5   60.90    2.50
  -4  -3   5   68.30    4.40
   4  -3  -5   61.10    2.60
   4  -3  -5   72.60    5.20
   4   3  -4    9.10    0.80
   4   3  -4    8.10    0.70
   4   3  -4    9.50    2.60
  -4   3   4   10.50    0.80
  -4   3   4    9.00    2.40
  -4  -3   4   10.00    0.80
  -4  -3   4   11.50    2.50
   4  -3  -4   10.20    0.80
   4  -3  -4   10.80    1.60
   4   3  -3   26.10    1.20
   4   3  -3   27.40    1.20
   4   3  -3   21.60    2.60
  -4   3   3   35.00    2.30
  -4   3   3   26.80    3.00
  -4  -3   3   26.90    1.30
  -4  -3   3   31.40    3.40
   4  -3  -3   27.20    1.30
   4  -3  -3   27.40    3.00
   4   3  -2   30.90    1.40
   4   3  -2   28.40    1.30
   4   3  -2   35.10    2.90
  -4   3   2   30.70    1.30
  -4   3   2   33.30    2.90
  -4  -3   2   29.20    1.30
  -4  -3   2   31.60    2.90
   4  -3  -2   30.70    1.40
   4  -3  -2   30.00    2.90
   4   3  -1    0.50    0.50
   4   3  -1   -0.70    1.50
  -4   3   1    0.20    0.50
  -4   3   1    1.20    2.30
  -4  -3   1    0.00    0.60
  -4  -3   1    1.90    2.20
   4  -3  -1    0.00    0.40
   4  -3  -1    1.60    2.10
   4   3   0   45.90    2.10
   4   3   0   47.50    3.80
  -4   3   0   44.30    2.60
  -4   3   0   52.60    3.90
  -4  -3   0   45.20    1.90
  -4  -3   0   53.00    3.70
   4  -3   0   46.90    1.90
   4  -3   0   47.80    3.70
   4   3   1    0.90    0.40
   4   3   1   -0.30    1.40
  -4   3  -1    0.60    0.40
  -4   3  -1    0.60    1.60
  -4  -3  -1    0.70    0.60
  -4  -3  -1    1.10    1.40
   4  -3   1    0.80    0.50
   4  -3   1    0.90    1.60
   4   3   2  235.00    8.20
   4   3   2  235.80   10.40
  -4   3  -2  221.40    8.70
  -4   3  -2  232.80    8.20
  -4   3  -2  238.80   13.90
  -4  -3  -2  227.00    8.30
  -4  -3  -2  249.80   13.80
   4  -3   2  227.50    9.80
   4  -3   2  235.50   11.50
   4   3   3    9.90    0.80
   4   3   3    7.00    2.40
  -4   3  -3    9.80    0.80
  -4   3  -3    9.30    0.60
  -4   3  -3   11.80    2.80
  -4  -3  -3    9.70    0.80
  -4  -3  -3   10.10    2.10
   4  -3   3   10.80    0.80
   4  -3   3    7.80    2.10
   4   3   4   31.40    1.40
   4   3   4   26.90    2.70
  -4   3  -4   29.60    1.50
  -4   3  -4   29.60    1.60
  -4   3  -4   32.80    3.30
  -4  -3  -4   30.80    1.50
  -4  -3  -4   29.90    3.10
   4  -3   4   31.70    1.50
   4   3   5   13.50    0.80
   4   3   5    9.50    2.10
  -4   3  -5   13.20    1.10
  -4   3  -5   15.50    1.10
  -4   3  -5   16.50    3.50
  -4  -3  -5   13.20    1.00
  -4  -3  -5   12.40    3.20
   4  -3   5   13.80    1.00
   4   3   6    8.10    0.60
   4   3   6    7.90    0.80
   4   3   6    3.40    1.90
  -4   3  -6    8.30    1.00
  -4   3  -6    7.10    0.60
  -4   3  -6    8.40    3.10
  -4  -3  -6    8.40    0.70
  -4  -3  -6    6.30    2.60
   4  -3   6    8.30    0.80
   4   3   7   44.20    2.50
   4   3   7   48.40    2.60
   4   3   7   41.50    4.10
  -4   3  -7   45.90    2.60
  -4   3  -7   50.20    5.00
  -4  -3  -7   43.20    2.00
  -4  -3  -7   38.30    4.10
   4  -3   7   43.90    2.10
   4   3   8   10.50    0.90
   4   3   8   17.30    3.10
   4   3   8    6.80    2.70
  -4   3  -8   10.10    0.90
  -4   3  -8   15.40    3.10
  -4  -3  -8   12.00    0.90
  -4  -3  -8   14.30    2.90
   4  -3   8    9.80    0.90
   4   3   9   81.50    3.40
   4   3   9   82.30    3.70
   4   3   9   74.80    5.20
  -4   3  -9   83.00    4.70
  -4   3  -9   94.30    7.50
  -4  -3  -9   85.40    4.30
  -4  -3  -9   96.60    6.40
   4  -3   9   81.40    3.60
   4   3  10    4.10    0.60
   4   3  10    4.00    1.00
  -4   3 -10    4.20    0.90
  -4   3 -10    3.20    3.60
  -4  -3 -10    4.00    0.70
  -4  -3 -10    4.00    3.00
   4  -3  10    3.20    0.80
   4   3  11   60.40    2.70
   4   3  11   56.00    2.90
  -4   3 -11   57.80    3.20
  -4   3 -11   67.30    5.80
  -4  -3 -11   60.10    5.00
   4  -3  11   58.70    2.60
   4   3  12   24.00    1.70
   4  -3  12   25.60    1.40
   4   3  13   16.60    2.00
   4   3  14   20.40    2.10
   4   3  15   20.90    2.30
   4   3  16   14.00    1.50
  -4   4  16    5.00    1.90
  -4   4  15    6.70    1.80
  -4   4  14    1.40    2.30
  -4   4  13   32.60    2.40
   4   4 -12   32.50    2.00
   4   4 -12   34.80    1.60
   4   4 -12   30.60    3.60
  -4   4  12   31.70    2.10
   4   4 -11    7.60    0.90
   4   4 -11    6.80    0.70
   4   4 -11    6.80    2.80
  -4   4  11    8.40    1.30
   4   4 -10   12.70    1.00
   4   4 -10   14.40    1.00
   4   4 -10   12.40    1.70
   4   4 -10   16.10    2.50
  -4   4  10   13.90    0.80
  -4   4  10   12.80    1.60
  -4   4  10   10.20    1.70
  -4  -4  10   13.10    0.90
   4  -4 -10   13.30    0.80
   4   4  -9   48.10    2.20
   4   4  -9   53.90    2.80
   4   4  -9   56.60    4.50
  -4   4   9   52.70    2.20
  -4   4   9   56.00    2.40
  -4   4   9   50.10    3.60
  -4  -4   9   51.30    2.20
   4  -4  -9   49.40    2.10
   4   4  -8    7.90    0.80
   4   4  -8    8.60    1.10
   4   4  -8    7.50    2.90
  -4   4   8    8.90    0.60
  -4   4   8    9.70    1.20
  -4   4   8    8.00    1.80
  -4  -4   8    8.60    0.80
   4  -4  -8    7.70    0.60
   4   4  -7   57.10    2.40
   4   4  -7   59.40    2.60
   4   4  -7   59.50    4.30
  -4   4   7   58.90    2.40
  -4   4   7   62.50    2.50
  -4   4   7   62.00    3.70
  -4  -4   7   57.60    2.50
   4  -4  -7   56.80    2.40
   4   4  -6   52.00    2.20
   4   4  -6   49.80    2.20
   4   4  -6   49.70    4.20
  -4   4   6   52.50    2.20
  -4   4   6   56.40    3.60
  -4  -4   6   51.70    2.00
  -4  -4   6   52.50    4.10
   4  -4  -6   52.10    2.10
   4   4  -5   34.10    1.60
   4   4  -5   32.00    1.60
   4   4  -5   28.30    3.60
  -4   4   5   32.50    1.50
  -4   4   5   31.00    3.10
  -4  -4   5   34.70    1.70
  -4  -4   5   38.30    3.80
   4  -4  -5   33.80    1.40
   4  -4  -5   34.60    2.80
   4   4  -4  117.40    4.50
   4   4  -4  117.00    4.50
   4   4  -4  116.10    6.60
  -4   4   4  125.10    5.90
  -4  -4   4  114.80    4.30
  -4  -4   4  131.70    6.10
   4  -4  -4  113.40    4.20
   4  -4  -4  114.00    5.70
   4   4  -3   63.10    2.50
   4   4  -3   65.10    2.70
   4   4  -3   70.20    4.30
  -4   4   3   61.80    2.60
  -4   4   3   64.60    3.90
  -4  -4   3   62.80    2.50
  -4  -4   3   79.10    7.00
   4  -4  -3   64.40    2.50
   4  -4  -3   61.20    4.00
   4   4  -2    0.90    0.60
   4   4  -2   -2.20    1.70
  -4   4   2    0.50    0.50
  -4   4   2    1.70    2.30
  -4  -4   2    0.50    0.40
  -4  -4   2    1.60    1.60
   4  -4  -2    0.30    0.40
   4  -4  -2   -0.50    1.60
   4   4  -1  536.20   18.10
   4   4  -1  557.70   21.00
  -4   4   1  505.70   17.70
  -4   4   1  579.70   21.40
  -4  -4   1  519.30   17.60
  -4  -4   1  564.60   20.80
   4  -4  -1  525.40   17.80
   4  -4  -1  541.10   20.90
   4   4   0  325.60   11.50
   4   4   0  346.90   13.90
  -4   4   0  330.80   11.50
  -4   4   0  354.70   13.50
  -4  -4   0  316.80   11.30
  -4  -4   0  350.80   13.10
   4  -4   0  326.60   11.30
   4  -4   0  350.70   14.50
   4   4   1 1460.50   47.90
   4   4   1 1505.80   54.40
  -4   4  -1 1376.30   47.60
  -4   4  -1 1555.00   53.20
  -4  -4  -1 1383.20   47.20
  -4  -4  -1 1550.20   53.60
   4  -4   1 1443.70   47.20
   4   4   2  145.80    5.20
   4   4   2  160.40    6.80
  -4   4  -2  140.50    5.80
  -4   4  -2  156.70    9.80
  -4  -4  -2  140.60    5.90
  -4  -4  -2  148.60    7.60
   4  -4   2  143.10    5.30
   4   4   3  137.00    4.90
   4   4   3  132.80    6.60
  -4   4  -3  128.80    5.10
  -4   4  -3  138.20    5.10
  -4   4  -3  138.80    7.30
  -4  -4  -3  126.20    4.70
  -4  -4  -3  141.10    7.50
   4  -4   3  132.50    4.90
   4   4   4   17.20    1.00
   4   4   4   16.10    2.40
  -4   4  -4   17.70    1.10
  -4   4  -4   16.30    1.00
  -4   4  -4   19.40    3.00
  -4  -4  -4   16.40    1.00
  -4  -4  -4   17.40    2.30
   4  -4   4   17.10    1.00
   4   4   5   75.40    3.70
   4   4   5   77.80    5.50
  -4   4  -5   72.20    3.20
  -4   4  -5   77.30    3.20
  -4   4  -5   82.80    5.40
  -4  -4  -5   75.20    3.90
  -4  -4  -5   86.30    5.40
   4  -4   5   78.80    3.90
   4   4   6   16.70    1.10
   4   4   6   15.20    3.00
  -4   4  -6   18.00    1.10
  -4   4  -6   17.00    1.00
  -4   4  -6   19.10    3.80
  -4  -4  -6   20.80    2.30
  -4  -4  -6   15.40    2.50
   4  -4   6   17.00    1.10
   4   4   7   45.90    2.10
   4   4   7   47.30    2.40
   4   4   7   42.10    4.00
  -4   4  -7   45.00    2.10
  -4   4  -7   44.40    2.30
  -4   4  -7   49.00    4.60
  -4  -4  -7   45.50    2.00
  -4  -4  -7   51.10    4.10
   4  -4   7   48.80    2.80
   4   4   8   17.20    1.10
   4   4   8   20.30    2.80
   4   4   8   12.80    2.40
  -4   4  -8   17.40    1.30
  -4   4  -8   15.80    1.30
  -4   4  -8   15.40    3.20
  -4  -4  -8   19.50    1.50
  -4  -4  -8   19.70    3.20
   4  -4   8   19.80    1.20
   4   4   9   72.60    3.20
   4   4   9   66.90    3.50
   4   4   9   66.40    4.70
  -4   4  -9   66.80    3.20
  -4   4  -9   73.50    5.80
  -4  -4  -9   75.30    3.50
  -4  -4  -9   82.10    5.60
   4  -4   9   72.00    3.00
   4   4  10    7.70    0.70
   4   4  10    9.20    1.20
   4   4  10    2.20    2.40
   4   4  10    3.90    1.80
  -4   4 -10    8.30    1.10
  -4   4 -10    7.30    4.00
  -4  -4 -10    7.20    0.80
  -4  -4 -10    7.90    2.90
   4  -4  10    7.70    0.80
   4   4  11    2.70    0.70
   4   4  11    2.40    0.80
  -4   4 -11    3.00    0.80
  -4   4 -11    1.00    3.90
  -4  -4 -11    3.50    2.30
   4  -4  11    2.70    0.80
   4   4  12    4.90    1.40
   4  -4  12    5.20    0.70
   4   4  13   13.80    1.60
   4   4  14   44.60    2.90
   4   4  15    7.60    2.30
  -4   5  16    4.60    1.70
  -4   5  15    0.80    1.20
  -4   5  14    3.10    2.10
   4   5 -13   29.40    1.60
  -4   5  13   28.20    2.00
   4   5 -12   15.40    1.30
   4   5 -12   19.60    1.80
   4   5 -12   17.00    3.50
  -4   5  12   14.70    1.40
   4   5 -11  100.90    4.20
   4   5 -11   96.80    4.30
   4   5 -11  109.80    6.50
  -4   5  11  103.40    4.40
   4   5 -10   40.30    1.90
   4   5 -10   41.30    1.90
   4   5 -10   36.50    2.20
   4   5 -10   39.10    3.90
  -4   5  10   42.00    2.00
  -4   5  10   40.50    2.20
  -4   5  10   33.00    2.70
   4  -5 -10   40.40    1.70
   4   5  -9  116.20    4.60
   4   5  -9  112.50    5.20
   4   5  -9  123.90    7.30
  -4   5   9  121.90    4.60
  -4   5   9  120.90    4.90
  -4   5   9  119.30    6.50
  -4  -5   9  124.00    5.30
   4  -5  -9  120.40    4.60
   4   5  -8    0.70    0.70
   4   5  -8    0.80    0.60
   4   5  -8    0.20    2.80
  -4   5   8    1.30    0.50
  -4   5   8    0.30    0.80
  -4   5   8    1.30    1.90
  -4  -5   8    1.60    0.80
   4  -5  -8    1.20    0.40
   4   5  -7  239.80    8.80
   4   5  -7  237.20    8.70
   4   5  -7  233.30   10.90
  -4   5   7  245.00    8.90
  -4   5   7  251.90   10.40
  -4  -5   7  244.80    8.60
   4  -5  -7  238.60    8.80
   4   5  -6    3.70    0.60
   4   5  -6    4.50    0.70
   4   5  -6    1.80    2.00
  -4   5   6    4.40    0.70
  -4   5   6    1.60    2.10
  -4  -5   6    4.00    0.70
   4  -5  -6    4.70    0.60
   4   5  -5  544.70   18.50
   4   5  -5  563.30   19.20
   4   5  -5  578.20   22.20
  -4   5   5  567.30   19.80
  -4   5   5  597.10   25.40
  -4  -5   5  556.50   18.70
  -4  -5   5  606.70   24.00
   4  -5  -5  553.10   18.70
   4   5  -4   10.80    0.80
   4   5  -4   11.60    0.70
   4   5  -4    9.80    2.20
  -4   5   4   10.50    0.70
  -4   5   4   12.80    2.00
  -4  -5   4   10.90    0.80
  -4  -5   4    8.10    3.20
   4  -5  -4   11.10    0.70
   4   5  -3   36.20    1.80
   4   5  -3   40.60    4.10
  -4   5   3   34.80    1.50
  -4   5   3   38.10    3.30
  -4  -5   3   37.70    1.60
  -4  -5   3   38.30    4.10
   4  -5  -3   37.30    1.70
   4   5  -2  179.90    6.40
   4   5  -2  181.60    8.00
  -4   5   2  177.10    7.30
  -4   5   2  203.20    9.00
  -4  -5   2  184.90    6.60
  -4  -5   2  203.40    9.10
   4  -5  -2  187.00    7.20
   4   5  -1  698.10   22.80
   4   5  -1  725.30   26.40
  -4   5   1  677.20   23.10
  -4   5   1  760.10   27.60
  -4  -5   1  687.70   24.30
  -4  -5   1  751.90   32.40
   4  -5  -1  682.60   23.00
   4   5   0   92.90    3.60
   4   5   0   88.70    5.80
  -4   5   0   87.10    3.80
  -4   5   0   93.70    6.90
  -4  -5   0   90.00    3.80
  -4  -5   0  103.60    5.90
   4  -5   0   90.50    3.50
   4   5   1   37.10    1.70
   4   5   1   42.60    3.50
  -4   5  -1   33.50    1.50
  -4   5  -1   35.20    3.50
  -4  -5  -1   32.30    2.10
  -4  -5  -1   42.30    4.40
   4  -5   1   33.50    1.60
   4   5   2   18.70    1.10
   4   5   2   16.30    2.60
  -4   5  -2   17.10    0.90
  -4   5  -2   15.80    2.70
  -4  -5  -2   16.40    1.00
  -4  -5  -2   20.00    2.70
   4  -5   2   18.70    1.00
   4   5   3  232.30    8.80
   4   5   3  223.30   10.80
  -4   5  -3  219.70    7.90
  -4   5  -3  237.80    9.80
  -4   5  -3  246.30   10.70
  -4  -5  -3  222.70    7.90
  -4  -5  -3  243.70   12.50
   4  -5   3  230.40    8.00
   4   5   4   65.20    2.90
   4   5   4   59.30    4.60
  -4   5  -4   63.20    2.80
  -4   5  -4   66.60    2.90
  -4   5  -4   68.50    5.60
  -4  -5  -4   62.80    2.60
  -4  -5  -4   73.00    4.90
   4  -5   4   66.80    3.20
   4   5   5   67.70    3.30
   4   5   5   48.10    5.00
  -4   5  -5   62.10    3.10
  -4   5  -5   65.10    2.80
  -4   5  -5   73.20    5.50
  -4  -5  -5   62.20    2.50
  -4  -5  -5   65.00    4.60
   4  -5   5   63.10    2.60
   4   5   6   15.30    1.10
   4   5   6   13.90    2.90
  -4   5  -6   14.30    1.10
  -4   5  -6   14.30    1.00
  -4   5  -6   13.30    2.70
  -4  -5  -6   20.00    3.00
  -4  -5  -6   19.50    3.40
   4  -5   6   14.00    1.10
   4   5   7   12.00    0.90
   4   5   7    9.30    2.70
  -4   5  -7   13.10    1.20
  -4   5  -7   13.70    1.70
  -4   5  -7   11.20    3.90
  -4  -5  -7   12.70    0.90
  -4  -5  -7   17.70    3.20
   4  -5   7   12.90    1.10
   4   5   8   19.70    1.20
   4   5   8   21.20    1.40
   4   5   8   17.50    2.90
  -4   5  -8   19.30    1.30
  -4   5  -8   19.70    1.60
  -4   5  -8   15.90    4.00
  -4  -5  -8   20.50    1.30
  -4  -5  -8   18.40    3.50
   4  -5   8   19.50    1.30
   4   5   9  105.90    4.60
   4   5   9  108.70    4.60
   4   5   9   98.40    6.40
  -4   5  -9  107.20    4.70
  -4   5  -9  103.30    4.80
  -4   5  -9  103.80    7.60
  -4  -5  -9  101.30    4.80
  -4  -5  -9  111.40    6.70
   4  -5   9  102.40    4.30
   4   5  10    7.70    0.80
   4   5  10    7.20    1.20
   4   5  10    4.70    2.40
  -4   5 -10    6.80    0.80
  -4   5 -10    5.70    3.10
  -4  -5 -10    8.60    0.90
  -4  -5 -10    8.40    3.00
   4  -5  10    8.60    1.00
   4   5  11    2.30    0.60
   4   5  11    4.10    1.90
  -4   5 -11    3.90    1.20
  -4   5 -11    0.80    2.80
   4  -5  11    3.40    0.80
   4   5  12    1.20    1.10
  -4   5 -12    7.40    3.90
   4  -5  12    1.40    0.50
   4   5  13   14.90    1.90
   4   5  14   16.50    1.80
   4   5  15   64.30    3.60
  -4   6  16    2.40    1.50
  -4   6  15    0.10    1.80
  -4   6  14   14.00    1.80
   4   6 -13   30.10    1.80
  -4   6  13   30.10    2.10
   4   6 -12    8.60    0.90
   4   6 -12    8.30    3.70
  -4   6  12    7.70    1.70
   4   6 -11   15.70    1.30
   4   6 -11   16.70    1.20
   4   6 -11   15.10    4.00
  -4   6  11   13.80    1.20
   4   6 -10   23.40    1.40
   4   6 -10   21.60    1.30
   4   6 -10   25.10    4.00
  -4   6  10   24.10    1.10
  -4   6  10   23.80    1.60
  -4   6  10   16.80    2.20
   4  -6 -10   22.10    1.10
   4   6  -9   26.30    1.20
   4   6  -9   24.30    1.70
   4   6  -9   23.60    4.00
  -4   6   9   28.40    1.50
  -4   6   9   30.60    2.30
  -4   6   9   21.00    2.30
  -4  -6   9   25.90    1.40
   4  -6  -9   28.10    1.30
   4   6  -8   14.70    1.00
   4   6  -8   14.40    1.10
   4   6  -8   14.70    2.80
  -4   6   8   16.30    1.00
  -4   6   8   10.60    2.40
  -4  -6   8   14.80    1.10
   4  -6  -8   15.60    1.00
   4   6  -7   12.90    1.00
   4   6  -7   15.10    1.10
   4   6  -7   12.40    3.60
  -4   6   7   16.60    1.30
  -4   6   7   11.40    2.70
  -4  -6   7   12.40    0.90
   4  -6  -7   12.40    0.90
   4   6  -6   19.70    1.10
   4   6  -6   22.40    1.20
   4   6  -6   19.30    3.00
  -4   6   6   21.30    1.10
  -4   6   6   20.60    2.80
  -4  -6   6   19.80    1.30
   4  -6  -6   20.70    1.10
   4   6  -5    8.30    0.90
   4   6  -5    7.60    0.60
   4   6  -5    9.20    3.10
  -4   6   5    8.30    0.80
  -4   6   5    5.30    2.50
  -4  -6   5   10.20    0.90
   4  -6  -5    9.30    0.90
   4   6  -4  166.10    6.00
   4   6  -4  165.00    7.30
  -4   6   4  162.70    5.90
  -4   6   4  175.50    7.50
  -4  -6   4  161.10    5.90
  -4  -6   4  156.80    8.10
   4  -6  -4  161.30    5.80
   4   6  -3  207.70    7.00
   4   6  -3  216.80    9.40
  -4   6   3  200.50    7.10
  -4   6   3  222.10    9.30
  -4  -6   3  203.80    8.10
  -4  -6   3  222.10   10.20
   4  -6  -3  205.00    7.30
   4   6  -2   27.00    1.30
   4   6  -2   29.70    3.00
  -4   6   2   26.60    1.30
  -4   6   2   24.90    3.10
  -4  -6   2   25.50    1.30
  -4  -6   2   25.30    3.00
   4  -6  -2   26.70    1.30
   4   6  -1   12.50    1.30
   4   6  -1   13.30    2.40
  -4   6   1   11.30    0.90
  -4   6   1   11.40    2.40
  -4  -6   1   11.50    1.00
  -4  -6   1   13.20    3.30
   4  -6  -1   13.10    0.90
   4   6   0  230.60    8.00
   4   6   0  235.40   10.60
  -4   6   0  220.80    7.90
  -4   6   0  247.80   10.50
  -4  -6   0  223.90    9.40
  -4  -6   0  253.10   13.60
   4  -6   0  229.70    8.20
   4   6   1  570.90   21.40
   4   6   1  585.80   24.40
  -4   6  -1  538.80   18.60
  -4   6  -1  622.40   23.30
  -4  -6  -1  539.60   18.80
  -4  -6  -1  614.30   22.20
   4  -6   1  554.60   19.00
   4   6   2   46.90    2.00
   4   6   2   39.00    4.10
  -4   6  -2   41.90    1.90
  -4   6  -2   45.20    3.70
  -4  -6  -2   44.40    1.90
  -4  -6  -2   45.60    4.00
   4  -6   2   45.50    2.00
   4   6   3  148.60    6.40
   4   6   3  144.90    9.40
  -4   6  -3  136.40    5.20
  -4   6  -3  158.80    8.00
  -4  -6  -3  136.60    5.00
  -4  -6  -3  142.60    7.20
   4  -6   3  146.10    5.40
   4   6   4  143.50    5.70
   4   6   4  134.40    6.90
  -4   6  -4  141.40    6.30
  -4   6  -4  146.70    5.50
  -4   6  -4  154.60   10.20
  -4  -6  -4  136.60    5.10
  -4  -6  -4  152.30    7.40
   4  -6   4  135.40    5.20
   4   6   5    4.00    0.70
   4   6   5    3.30    3.00
  -4   6  -5    4.00    1.00
  -4   6  -5    4.70    0.50
  -4   6  -5    3.60    2.40
  -4  -6  -5    3.60    0.80
  -4  -6  -5    4.70    2.90
   4  -6   5    4.70    0.90
   4   6   6  181.50    6.50
   4   6   6  185.70    9.10
  -4   6  -6  176.60    7.20
  -4   6  -6  180.50    7.00
  -4   6  -6  195.20   10.20
  -4  -6  -6  173.90    6.50
  -4  -6  -6  195.30    8.90
   4  -6   6  181.80    6.90
   4   6   7   44.20    2.10
   4   6   7   39.00    4.10
  -4   6  -7   43.00    2.40
  -4   6  -7   44.50    2.80
  -4   6  -7   41.40    4.20
  -4  -6  -7   42.40    2.30
  -4  -6  -7   40.60    3.50
   4  -6   7   46.40    2.50
   4   6   8    0.20    0.50
   4   6   8    3.60    1.90
  -4   6  -8    0.30    0.80
  -4   6  -8   -0.60    0.70
  -4   6  -8   -1.10    4.20
  -4  -6  -8    0.10    0.60
  -4  -6  -8   -0.40    2.70
   4  -6   8    0.40    0.80
   4   6   9    2.40    0.50
   4   6   9    2.90    1.00
   4   6   9    0.00    2.70
  -4   6  -9    3.30    0.90
  -4   6  -9    2.40    1.00
  -4   6  -9    2.40    3.30
  -4  -6  -9    3.60    0.70
  -4  -6  -9   -0.70    3.00
   4  -6   9    2.20    0.90
   4   6  10   11.40    0.90
   4   6  10   11.00    1.20
   4   6  10    5.60    2.60
  -4   6 -10   10.40    1.20
  -4   6 -10   12.00    5.10
  -4  -6 -10   12.60    1.00
   4  -6  10   12.60    1.80
   4   6  11    1.00    0.40
   4   6  11    2.60    1.60
  -4   6 -11    2.30    1.20
  -4   6 -11    1.90    4.20
   4  -6  11    0.60    0.90
   4   6  12    5.80    2.20
  -4   6 -12    4.90    3.40
   4  -6  12    2.30    0.60
   4   6  13   23.50    1.80
   4   6  14    8.10    1.80
   4   6  15    5.20    1.50
  -4   7  15   20.40    2.70
  -4   7  14    0.30    1.30
   4   7 -13    1.70    0.90
  -4   7  13    2.10    1.60
   4   7 -12    9.60    1.00
   4   7 -12    6.90    4.20
  -4   7  12    9.10    1.40
   4   7 -11   23.00    1.30
   4   7 -11   22.60    2.00
   4   7 -11   19.30    3.80
  -4   7  11   23.60    1.00
  -4   7  11   25.80    1.90
  -4   7  11   16.10    1.50
   4   7 -10   98.20    4.10
   4   7 -10  100.20    4.40
   4   7 -10  103.10    7.10
  -4   7  10  108.70    4.20
  -4   7  10  107.20    4.50
  -4   7  10   97.90    6.10
   4  -7 -10  103.30    4.00
   4   7  -9    9.80    2.20
   4   7  -9    7.80    0.90
   4   7  -9    8.70    1.50
   4   7  -9    6.50    3.90
  -4   7   9    8.30    0.80
  -4   7   9    6.70    2.20
  -4  -7   9    9.30    0.90
   4  -7  -9    9.00    0.60
   4   7  -8   37.20    1.80
   4   7  -8   41.00    2.20
   4   7  -8   35.70    4.60
  -4   7   8   31.70    3.50
  -4  -7   8   40.30    1.90
   4  -7  -8   37.20    1.70
   4   7  -7  145.70    5.60
   4   7  -7  138.00    5.30
   4   7  -7  146.20    8.60
  -4   7   7  146.90    5.70
  -4   7   7  148.60    7.60
  -4  -7   7  142.10    5.20
   4  -7  -7  138.60    5.30
   4   7  -6   13.40    1.00
   4   7  -6   13.40    1.00
   4   7  -6   13.90    3.00
  -4   7   6   14.20    0.90
  -4   7   6   14.90    3.00
  -4  -7   6   14.00    1.20
   4  -7  -6   15.70    1.00
   4   7  -5  202.90    7.10
   4   7  -5  214.30    8.00
   4   7  -5  205.10    9.20
  -4   7   5  204.10    7.90
  -4   7   5  217.90   10.20
  -4  -7   5  206.70    7.90
   4  -7  -5  203.10    7.20
   4   7  -4    1.20    0.50
   4   7  -4    1.40    2.20
  -4   7   4    0.60    0.60
  -4   7   4    2.60    2.70
  -4  -7   4    1.10    0.70
   4  -7  -4    2.20    0.50
   4   7  -3    3.60    0.60
   4   7  -3    1.70    3.40
  -4   7   3    2.80    0.50
  -4   7   3    1.30    2.50
  -4  -7   3    2.90    0.60
   4  -7  -3    3.80    0.50
   4   7  -2  306.60   10.30
   4   7  -2  315.30   12.70
  -4   7   2  299.40   11.00
  -4   7   2  323.90   15.80
  -4  -7   2  305.50   11.50
  -4  -7   2  370.80   18.30
   4  -7  -2  305.50   10.50
   4   7  -1  227.00    7.70
   4   7  -1  237.80   10.10
  -4   7   1  219.80    7.60
  -4   7   1  245.90   11.40
  -4  -7   1  216.60    7.80
  -4  -7   1  233.80   10.30
   4  -7  -1  222.50    7.80
   4   7   0  945.40   30.80
   4   7   0  994.80   35.40
  -4   7   0  922.70   31.00
  -4   7   0 1044.20   39.20
  -4  -7   0  932.10   31.80
  -4  -7   0 1047.00   38.40
   4  -7   0  917.70   31.70
   4   7   1    1.50    0.80
   4   7   1   -2.20    3.20
  -4   7  -1    0.60    0.60
  -4   7  -1    0.80    2.20
  -4  -7  -1    1.40    0.90
  -4  -7  -1   -2.50    3.00
   4  -7   1   -0.40    0.80
   4   7   2  404.00   13.80
   4   7   2  424.80   16.90
  -4   7  -2  392.20   13.70
  -4   7  -2  442.80   18.10
  -4  -7  -2  391.10   14.00
  -4  -7  -2  442.10   20.80
   4  -7   2  405.90   14.00
   4   7   3  161.10    6.00
   4   7   3  154.20    7.50
  -4   7  -3  152.90    5.90
  -4   7  -3  184.20    9.60
  -4  -7  -3  155.10    6.00
  -4  -7  -3  165.30    8.20
   4  -7   3  156.60    5.80
   4   7   4  202.50    8.80
   4   7   4  199.10   11.80
  -4   7  -4  191.30    7.60
  -4   7  -4  205.00    9.10
  -4   7  -4  211.80    9.90
  -4  -7  -4  191.30    7.50
  -4  -7  -4  196.00    9.70
   4  -7   4  189.20    7.20
   4   7   5   25.60    1.40
   4   7   5   17.40    2.80
  -4   7  -5   25.90    2.00
  -4   7  -5   26.00    1.50
  -4   7  -5   24.40    4.70
  -4  -7  -5   28.20    2.00
  -4  -7  -5   19.80    4.20
   4  -7   5   24.70    1.60
   4   7   6    1.60    0.50
   4   7   6   -0.90    2.00
  -4   7  -6    3.10    1.10
  -4   7  -6    1.00    0.40
  -4   7  -6    0.10    3.80
  -4  -7  -6    2.00    1.00
  -4  -7  -6   -1.20    3.30
   4  -7   6    1.40    0.60
   4   7   7    1.90    0.70
   4   7   7   -1.20    2.60
  -4   7  -7    2.50    0.90
  -4   7  -7    3.30    0.90
  -4   7  -7    1.80    4.40
  -4  -7  -7    2.60    0.80
  -4  -7  -7    1.50    3.30
   4  -7   7    3.10    1.70
   4   7   8    2.80    0.50
   4   7   8    0.90    2.50
  -4   7  -8    2.50    1.50
  -4   7  -8    6.10    1.90
  -4   7  -8    2.90    3.90
  -4  -7  -8    2.90    1.00
  -4  -7  -8    5.60    3.30
   4  -7   8    3.20    0.60
   4   7   9   70.90    3.00
   4   7   9   66.40    5.00
  -4   7  -9   68.20    3.30
  -4   7  -9   71.00    3.50
  -4   7  -9   72.20    6.10
  -4  -7  -9   72.60    3.70
   4  -7   9   68.20    2.90
   4   7  10   28.90    1.60
   4   7  10   28.50    1.90
   4   7  10   21.20    3.50
  -4   7 -10   29.90    1.90
  -4   7 -10   25.30    4.40
  -4  -7 -10   30.10    1.80
   4  -7  10   29.50    1.80
   4   7  11    3.60    0.90
  -4   7 -11    4.70    1.30
  -4   7 -11    1.40    4.70
   4  -7  11    2.80    1.00
   4   7  12   13.40    2.10
  -4   7 -12    6.00    5.50
   4  -7  12   12.40    1.10
   4   7  13    7.60    1.40
   4   7  14    6.70    1.70
   4   7  15   14.20    1.70
  -4   8  15    4.00    2.30
  -4   8  14    7.60    2.00
   4   8 -13   14.00    1.30
  -4   8  13   19.40    4.30
   4   8 -12   48.30    2.30
   4   8 -12   49.10    4.50
  -4   8  12   48.90    2.90
   4   8 -11    3.80    1.20
   4   8 -11    3.60    1.10
   4   8 -11    2.30    4.00
  -4   8  11    3.50    0.40
  -4   8  11    4.00    1.10
  -4   8  11    1.50    1.40
   4   8 -10   40.30    1.90
   4   8 -10   39.30    2.10
   4   8 -10   45.20    5.70
  -4   8  10   42.10    1.70
  -4   8  10   33.70    2.80
   4  -8 -10   40.80    1.80
   4   8  -9   27.20    1.80
   4   8  -9   25.30    1.50
   4   8  -9   24.20    1.50
   4   8  -9   28.80    4.50
  -4   8   9   29.70    1.70
  -4   8   9   24.90    2.80
   4  -8  -9   24.90    1.20
   4   8  -8  204.70    7.50
   4   8  -8  205.00    7.40
   4   8  -8  213.00   10.50
  -4   8   8  213.10    7.70
  -4   8   8  207.70   10.30
  -4  -8   8  216.20    7.50
   4  -8  -8  206.60    7.60
   4   8  -7    0.30    0.60
   4   8  -7    0.50    0.90
   4   8  -7   -0.50    2.30
  -4   8   7    0.20    0.50
  -4   8   7   19.50    8.90
  -4  -8   7    0.60    0.90
   4  -8  -7    1.00    0.50
   4   8  -6  286.80   10.30
   4   8  -6  300.70   11.10
   4   8  -6  303.30   13.50
  -4   8   6  298.70   10.70
  -4   8   6  300.30   13.00
  -4  -8   6  288.40   10.20
   4  -8  -6  279.60   10.10
   4   8  -5  287.00   10.10
   4   8  -5  297.20   13.20
  -4   8   5  296.80   10.10
  -4   8   5  325.80   13.40
  -4  -8   5  286.90   10.30
   4  -8  -5  277.60   10.20
   4   8  -4  198.00    7.50
   4   8  -4  203.00   10.30
  -4   8   4  196.00    6.80
  -4   8   4  211.80    9.10
  -4  -8   4  192.30    6.90
   4  -8  -4  198.20    6.90
   4   8  -3    3.60    0.80
   4   8  -3    6.30    2.50
  -4   8   3    2.90    0.50
  -4   8   3    1.30    2.90
  -4  -8   3    2.70    0.50
   4  -8  -3    2.40    0.50
   4   8  -2   84.80    3.20
   4   8  -2   78.80    6.70
  -4   8   2   80.70    3.50
  -4   8   2   81.50    5.20
  -4  -8   2   78.40    2.90
   4  -8  -2   82.30    4.00
   4   8  -1   78.90    3.00
   4   8  -1   77.30    5.70
  -4   8   1   77.70    2.90
  -4   8   1   85.40    5.40
  -4  -8   1   77.00    2.90
   4  -8  -1   79.90    3.70
   4   8   0   -0.40    0.50
   4   8   0   -3.60    2.80
  -4   8   0    0.00    0.80
  -4   8   0    4.90    3.30
  -4  -8   0    0.10    0.80
  -4  -8   0    0.90    2.30
   4  -8   0    0.30    0.80
   4   8   1   12.50    1.30
   4   8   1   13.00    3.40
  -4   8  -1   12.10    1.10
  -4   8  -1    6.80    2.90
  -4  -8  -1   13.60    1.10
  -4  -8  -1   12.80    2.70
   4  -8   1   14.10    1.00
   4   8   2   12.20    0.90
   4   8   2    6.40    3.50
  -4   8  -2   11.00    1.20
  -4   8  -2   12.00    4.00
  -4  -8  -2   12.10    0.90
  -4  -8  -2   10.90    2.70
   4  -8   2   13.30    1.30
   4   8   3    6.80    0.70
   4   8   3    3.00    2.20
  -4   8  -3    7.80    1.00
  -4   8  -3   17.20    7.30
  -4  -8  -3    6.80    0.70
  -4  -8  -3   12.20    2.80
   4  -8   3    6.80    0.80
   4   8   4    0.30    0.80
   4   8   4   -0.40    2.60
  -4   8  -4    0.40    0.50
  -4   8  -4   -2.90    2.90
  -4  -8  -4    0.60    0.50
  -4  -8  -4    2.50    2.40
   4  -8   4    0.10    0.60
   4   8   5   18.10    1.40
   4   8   5   14.80    2.70
  -4   8  -5   17.20    1.30
  -4   8  -5   19.60    1.50
  -4   8  -5   15.00    3.80
  -4  -8  -5   20.30    1.30
  -4  -8  -5   18.80    3.80
   4  -8   5   17.70    1.30
   4   8   6  119.30    4.40
   4   8   6  114.90    7.00
  -4   8  -6  115.60    5.20
  -4   8  -6  117.80    5.30
  -4   8  -6  138.60    8.20
  -4  -8  -6  118.30    4.70
  -4  -8  -6  125.90    7.20
   4  -8   6  119.40    4.90
   4   8   7   81.50    3.20
   4   8   7   75.70    5.10
  -4   8  -7   78.60    3.60
  -4   8  -7   78.80    3.30
  -4   8  -7   88.20    6.40
  -4  -8  -7   78.70    3.40
   4  -8   7   78.40    3.10
   4   8   8  117.80    5.10
   4   8   8   98.90    7.20
  -4   8  -8   99.90    4.70
  -4   8  -8  116.00    5.20
  -4   8  -8  114.10   10.00
  -4  -8  -8  124.50    5.90
   4  -8   8  110.60    4.40
   4   8   9    3.30    0.60
   4   8   9    2.50    2.90
  -4   8  -9    3.80    1.20
  -4   8  -9    2.60    0.80
  -4   8  -9    0.80    4.60
  -4  -8  -9    3.10    0.70
   4  -8   9    3.30    1.00
   4   8  10   11.30    1.00
   4   8  10   12.20    1.20
   4   8  10    8.30    3.00
  -4   8 -10   11.80    1.50
  -4   8 -10    9.80    3.90
  -4  -8 -10   14.60    2.20
   4  -8  10   12.80    1.30
   4   8  11  104.30    4.80
  -4   8 -11  106.90    5.80
  -4   8 -11  105.10    8.50
   4  -8  11  108.10    5.10
   4   8  12   31.80    2.60
  -4   8 -12   22.20    4.70
   4  -8  12   30.20    1.90
   4   8  13    5.60    1.80
   4   8  14   19.60    1.90
   4   8  15    3.10    1.60
  -4   9  15   57.40    4.70
  -4   9  14   22.00    2.60
   4   9 -13    0.90    0.90
  -4   9  13    0.60    1.20
   4   9 -12   87.00    3.70
   4   9 -12   82.70    7.40
  -4   9  12   96.70    4.80
   4   9 -11   40.30    2.10
   4   9 -11   45.90    2.60
   4   9 -11   38.80    5.40
  -4   9  11   46.10    2.30
   4   9 -10    0.90    1.00
   4   9 -10    0.80    0.90
   4   9 -10   -1.40    4.60
  -4   9  10    0.20    0.40
  -4   9  10   -1.00    1.90
   4  -9 -10    0.10    0.40
   4   9  -9    8.10    1.00
   4   9  -9    7.60    0.80
   4   9  -9    8.30    4.50
  -4   9   9    8.50    0.70
  -4   9   9    8.30    2.80
   4  -9  -9    9.60    0.90
   4   9  -8    1.20    0.90
   4   9  -8    1.40    0.80
   4   9  -8    3.20    1.20
   4   9  -8    3.80    4.10
  -4   9   8    1.90    0.60
  -4   9   8    4.90    2.70
  -4  -9   8    1.90    0.70
   4  -9  -8    2.00    1.00
   4   9  -7   24.60    1.50
   4   9  -7   28.30    1.80
   4   9  -7   29.00    3.90
  -4   9   7   26.60    1.30
  -4   9   7   24.70    3.00
  -4  -9   7   27.70    1.60
   4  -9  -7   25.10    1.20
   4   9  -6   47.00    2.20
   4   9  -6   40.00    2.00
   4   9  -6   46.20    5.40
  -4   9   6   45.90    2.00
  -4   9   6   44.00    4.40
  -4  -9   6   43.90    2.00
   4  -9  -6   42.60    1.80
   4   9  -5   28.70    1.40
   4   9  -5   27.70    4.70
  -4   9   5   29.20    1.40
  -4   9   5   25.20    3.20
  -4  -9   5   29.80    1.50
   4  -9  -5   29.60    1.50
   4   9  -4  101.30    3.70
   4   9  -4   97.90    7.00
  -4   9   4   97.40    4.00
  -4   9   4  101.70    6.30
  -4  -9   4   95.10    3.80
   4  -9  -4   94.90    4.10
   4   9  -3  221.20    8.30
   4   9  -3  228.20   11.30
  -4   9   3  212.20    7.30
  -4   9   3  233.30   11.10
  -4  -9   3  213.60    7.40
   4  -9  -3  218.50    8.10
   4   9  -2  286.00    9.70
   4   9  -2  274.70   12.90
  -4   9   2  273.90    9.40
  -4   9   2  313.00   13.90
  -4  -9   2  287.80    9.40
   4  -9  -2  276.60    9.80
   4   9  -1   15.50    1.00
   4   9  -1    9.00    2.90
  -4   9   1   12.80    1.30
  -4   9   1    8.10    3.80
  -4  -9   1   13.70    0.90
   4  -9  -1   14.00    1.00
   4   9   0   80.10    3.00
   4   9   0   85.00    5.70
  -4   9   0   76.80    2.90
  -4   9   0   81.70    5.70
  -4  -9   0   76.60    2.90
   4  -9   0   78.30    3.10
   4   9   1  135.00    4.80
   4   9   1  142.80    7.70
  -4   9  -1  131.40    4.80
  -4   9  -1  132.90    7.90
  -4  -9  -1  132.10    4.70
   4  -9   1  134.60    5.00
   4   9   2  460.80   16.00
   4   9   2  459.30   19.80
  -4   9  -2  443.90   15.30
  -4   9  -2  503.20   21.10
  -4  -9  -2  431.70   16.80
   4  -9   2  453.70   15.80
   4   9   3    3.70    0.90
   4   9   3    1.00    3.00
  -4   9  -3    2.70    0.90
  -4   9  -3    5.30    4.00
  -4  -9  -3    2.90    1.00
   4  -9   3    1.70    0.80
   4   9   4  208.80    9.30
   4   9   4  201.50   10.50
  -4   9  -4  193.90    7.90
  -4   9  -4  226.90   11.30
  -4  -9  -4  206.70   10.00
   4  -9   4  211.80    7.60
   4   9   5   27.40    1.50
   4   9   5   24.20    3.10
  -4   9  -5   31.00    3.90
  -4   9  -5   27.60    1.50
  -4   9  -5   22.50    5.50
  -4  -9  -5   28.00    1.40
   4  -9   5   25.70    1.30
   4   9   6  210.30    8.10
   4   9   6  194.80   10.40
  -4   9  -6  212.60   10.10
  -4   9  -6  207.10    7.70
  -4   9  -6  227.40   13.60
  -4  -9  -6  211.00    7.90
   4  -9   6  207.90    7.80
   4   9   7    8.70    0.90
   4   9   7   10.10    3.60
  -4   9  -7    7.20    1.10
  -4   9  -7    9.20    1.50
  -4   9  -7    5.30    4.60
  -4  -9  -7    8.80    1.20
   4  -9   7    7.00    1.20
   4   9   8   65.10    2.50
   4   9   8   48.20    5.00
  -4   9  -8   60.00    2.90
  -4   9  -8   59.70    3.00
  -4   9  -8   68.50    7.10
  -4  -9  -8   72.00    4.70
   4  -9   8   62.30    2.70
   4   9   9   50.20    2.10
   4   9   9   38.40    3.80
  -4   9  -9   44.70    2.20
  -4   9  -9   56.60    5.90
  -4  -9  -9   47.40    2.50
   4  -9   9   47.70    2.60
   4   9  10    0.00    0.50
   4   9  10    3.00    2.80
  -4   9 -10    1.60    1.90
  -4   9 -10    8.50    5.90
   4  -9  10    0.30    1.00
   4   9  11    1.90    1.80
  -4   9 -11   -1.10    5.60
   4  -9  11    1.80    1.10
   4   9  12    6.30    1.90
  -4   9 -12   21.40    9.60
   4  -9  12    5.70    1.30
   4   9  13    5.10    1.70
   4   9  14   25.90    2.60
  -4  10  15   17.00    2.90
  -4  10  14    1.50    1.40
   4  10 -13    1.50    1.00
  -4  10  13    2.80    1.50
   4  10 -12   44.60    2.20
   4  10 -12   48.20    5.80
  -4  10  12   53.70    3.50
   4  10 -11   72.20    3.60
   4  10 -11   73.30    3.90
   4  10 -11   69.80    6.90
   4  10 -10   74.90    3.30
   4  10 -10   82.30    4.90
   4  10 -10   89.70   10.70
  -4  10  10   76.70    3.50
  -4  10  10   71.00    4.80
   4 -10 -10   77.20    3.30
   4  10  -9    5.20    1.10
   4  10  -9    4.20    1.00
   4  10  -9   -6.10    5.40
  -4  10   9    4.60    0.70
  -4  10   9    2.10    2.80
   4 -10  -9    4.00    0.70
   4  10  -8   93.80    4.10
   4  10  -8   94.70    4.10
   4  10  -8   90.30    3.90
   4  10  -8  105.70    7.70
  -4  10   8   96.70    3.50
  -4  10   8   97.40    6.40
   4 -10  -8   93.00    3.60
   4  10  -7  141.50    5.40
   4  10  -7  142.80    5.70
   4  10  -7  136.20    8.40
  -4  10   7  148.70    5.40
  -4  10   7  151.10    8.10
  -4 -10   7  143.50    5.80
   4 -10  -7  146.90    5.40
   4  10  -6  302.20   10.80
   4  10  -6  305.60   11.80
   4  10  -6  317.60   14.90
  -4  10   6  310.80   11.20
  -4  10   6  330.80   13.80
  -4 -10   6  303.30   10.70
   4 -10  -6  295.20   10.80
   4  10  -5    4.70    0.80
   4  10  -5   -0.70    4.00
  -4  10   5    4.10    0.90
  -4  10   5    2.80    3.50
  -4 -10   5    4.30    0.80
   4 -10  -5    4.60    0.70
   4  10  -4    1.30    0.70
   4  10  -4    2.30    3.90
  -4  10   4    1.20    0.60
  -4  10   4   -0.70    2.50
  -4 -10   4    1.70    0.90
   4 -10  -4    1.50    0.80
   4  10  -3    4.10    1.00
   4  10  -3   -3.90    4.10
  -4  10   3    5.00    0.90
  -4  10   3   -2.20    3.70
  -4 -10   3    5.00    1.20
   4 -10  -3    5.40    0.70
   4  10  -2   56.10    2.30
   4  10  -2   52.70    4.90
  -4  10   2   57.00    2.30
  -4  10   2   54.20    5.00
  -4 -10   2   56.50    2.40
   4 -10  -2   57.70    2.50
   4  10  -1  188.10    6.40
   4  10  -1  190.00    9.50
  -4  10   1  178.30    6.40
  -4 -10   1  181.60    6.40
   4 -10  -1  188.30    6.50
   4  10   0   13.90    2.00
   4  10   0    8.40    2.80
  -4  10   0   11.80    1.00
  -4 -10   0   14.00    1.50
   4 -10   0   13.50    1.00
   4  10   1   10.90    1.00
   4  10   1    8.10    2.70
  -4  10  -1   12.30    0.90
  -4 -10  -1   12.80    1.00
   4 -10   1   11.50    1.00
   4  10   2   31.30    1.70
   4  10   2   21.60    4.80
  -4  10  -2   30.20    1.60
  -4 -10  -2   30.20    1.70
   4 -10   2   29.50    2.20
   4  10   3   97.80    3.70
   4  10   3   99.90    6.10
  -4  10  -3  100.20    4.30
  -4 -10  -3   95.40    3.90
   4 -10   3   96.90    3.80
   4  10   4    0.10    0.60
   4  10   4    0.30    2.30
  -4  10  -4    0.70    0.70
  -4  10  -4    2.30    3.00
  -4 -10  -4    0.40    0.60
   4 -10   4    0.00    0.60
   4  10   5  106.80    4.20
   4  10   5   98.60    7.20
  -4  10  -5  112.30    5.90
  -4  10  -5  103.90    9.00
  -4 -10  -5  106.60    4.10
   4 -10   5  104.90    4.20
   4  10   6   53.20    2.40
   4  10   6   48.30    4.40
  -4  10  -6   56.10    3.20
  -4  10  -6   52.10    2.40
  -4  10  -6   58.20    7.20
  -4 -10  -6   53.70    2.30
   4 -10   6   51.90    2.40
   4  10   7    1.30    0.80
   4  10   7   -0.60    3.40
  -4  10  -7    1.50    1.60
  -4  10  -7    0.50    0.90
  -4  10  -7    4.50    5.20
  -4 -10  -7    1.50    0.70
   4 -10   7    1.00    1.10
   4  10   8  103.80    3.90
   4  10   8  100.90    6.30
  -4  10  -8   98.00    4.60
  -4  10  -8  104.40    5.40
  -4  10  -8  104.40    9.60
  -4 -10  -8  108.50    5.30
   4 -10   8  104.50    5.40
   4  10   9   41.60    1.90
   4  10   9   31.00    4.20
  -4  10  -9   33.60    5.30
  -4 -10  -9   40.00    2.40
   4 -10   9   37.30    2.00
   4  10  10   37.60    2.00
   4  10  10   25.20    2.90
  -4  10 -10   46.60    7.10
   4 -10  10   36.10    2.10
  -4  10 -11   13.30    5.20
   4 -10  11   15.00    1.60
   4  10  12   21.20    2.10
  -4  10 -12   27.40    5.40
   4 -10  12   20.70    1.80
   4  10  13   32.50    2.40
   4  10  14    1.20    1.50
  -4  11  14   26.60    3.10
   4  11 -13   33.70    2.20
  -4  11  13   33.70    2.90
   4  11 -12   29.40    1.90
   4  11 -12   23.50    5.50
   4  11 -11   35.20    2.00
   4  11 -11   35.00    2.90
   4  11 -11   36.40    6.30
   4  11 -10    2.30    1.20
   4  11 -10    1.30    1.30
   4  11 -10    8.60    5.30
  -4  11  10    2.30    0.70
  -4  11  10   -1.30    2.50
   4  11  -9  137.40    5.80
   4  11  -9  128.60    5.60
   4  11  -9  144.50    9.20
  -4  11   9  144.10    5.60
  -4  11   9  123.70    7.90
   4 -11  -9  130.20    5.00
   4  11  -8    6.30    1.50
   4  11  -8    8.10    1.00
   4  11  -8    1.40    4.80
  -4  11   8    7.20    0.70
  -4  11   8    2.60    3.40
   4 -11  -8    8.10    0.90
   4  11  -7   65.70    3.40
   4  11  -7   67.60    3.40
   4  11  -7   73.00    3.30
   4  11  -7   69.50    6.20
  -4  11   7   64.80    2.60
  -4  11   7   61.00    5.00
   4 -11  -7   65.50    2.70
   4  11  -6   31.50    1.80
   4  11  -6   22.10    5.10
  -4  11   6   32.90    1.50
  -4  11   6   24.80    3.70
  -4 -11   6   32.60    2.00
   4 -11  -6   31.40    1.80
   4  11  -5    2.70    1.10
   4  11  -5   -3.20    4.20
  -4  11   5    4.30    0.90
  -4  11   5    4.40    2.50
  -4 -11   5    2.00    1.30
   4 -11  -5    3.60    0.60
   4  11  -4   52.80    2.70
   4  11  -4   49.10    6.00
  -4  11   4   53.20    2.40
  -4  11   4   44.00    5.30
  -4 -11   4   51.90    2.50
   4 -11  -4   52.80    4.50
   4  11  -3  125.10    4.60
   4  11  -3  118.00    7.80
  -4  11   3  118.20    4.40
  -4 -11   3  119.70    5.90
   4 -11  -3  112.60    4.30
   4  11  -2   53.40    2.30
   4  11  -2   51.50    5.10
  -4  11   2   53.80    2.20
  -4 -11   2   53.70    2.40
   4 -11  -2   54.70    2.30
   4  11  -1   10.00    1.00
   4  11  -1    8.00    3.10
  -4  11   1    8.30    1.20
  -4 -11   1    9.40    0.90
   4 -11  -1   10.00    0.90
   4  11   0   35.10    1.80
   4  11   0   32.40    4.70
  -4  11   0   33.90    3.10
  -4 -11   0   31.50    1.80
   4 -11   0   34.80    1.80
   4  11   1   14.50    1.20
   4  11   1    7.20    2.90
  -4  11  -1   14.30    1.10
  -4 -11  -1   14.50    1.10
   4 -11   1   14.90    1.20
   4  11   2   67.80    2.70
   4  11   2   63.90    5.40
  -4  11  -2   68.50    3.00
  -4 -11  -2   66.10    2.80
   4 -11   2   67.20    3.00
   4  11   3  231.50    8.10
   4  11   3  218.80   12.10
  -4  11  -3  238.70   10.10
  -4 -11  -3  228.30    8.30
   4 -11   3  223.90    8.20
   4  11   4   53.80    2.40
   4  11   4   55.30    5.50
  -4  11  -4   53.00    2.80
  -4 -11  -4   52.20    2.40
   4 -11   4   57.40    3.30
   4  11   5    0.30    0.60
   4  11   5   -3.00    2.70
  -4  11  -5   -0.40    1.10
  -4 -11  -5    0.40    0.90
   4 -11   5   -0.60    1.00
   4  11   6  163.00    6.40
   4  11   6  147.10    9.50
  -4  11  -6  170.40    8.40
  -4  11  -6  165.10    6.50
  -4  11  -6  180.70   11.10
  -4 -11  -6  160.80    5.90
   4 -11   6  161.10    6.40
   4  11   7  396.70   14.30
   4  11   7  378.50   19.80
  -4  11  -7  409.20   15.50
  -4  11  -7  422.70   21.80
  -4 -11  -7  388.10   13.60
   4 -11   7  399.00   16.80
   4  11   8    1.00    0.80
   4  11   8    1.00    3.40
  -4  11  -8    3.90    5.80
  -4 -11  -8    2.40    1.40
   4 -11   8    1.80    1.50
   4  11   9   84.00    3.50
   4  11   9   69.80    6.10
  -4  11  -9   83.10    8.40
  -4 -11  -9   82.70    4.10
   4 -11   9   73.10    3.50
   4  11  10   12.60    1.10
  -4  11 -10    3.70    6.90
   4 -11  10   12.40    1.30
  -4  11 -11  110.30   10.40
   4 -11  11  133.50    6.20
   4  11  12    1.80    1.30
   4 -11  12   -1.40    1.20
   4  11  13   49.60    3.30
   4  11  14   13.50    1.80
  -4  12  14   14.90    2.30
   4  12 -13   18.00    1.90
  -4  12  13   20.70    3.40
   4  12 -12    2.50    1.40
   4  12 -12    3.90    4.20
   4  12 -11   75.00    3.50
   4  12 -11   60.50    8.20
   4  12 -10    8.30    1.30
   4  12 -10    5.30    6.20
  -4  12  10    6.50    0.80
  -4  12  10    1.50    2.90
   4  12  -9   -0.70    1.10
   4  12  -9   -4.80    5.50
  -4  12   9   -0.20    0.70
  -4  12   9    2.70    3.40
   4 -12  -9    0.80    0.80
   4  12  -8    6.10    1.00
   4  12  -8    4.60    1.00
   4  12  -8    7.30    3.80
  -4  12   8    6.70    0.90
  -4  12   8    4.70    3.60
   4 -12  -8    6.60    1.20
   4  12  -7   84.50    3.60
   4  12  -7   83.40    4.30
   4  12  -7   80.60    8.00
  -4  12   7   89.20    3.50
  -4  12   7   72.20    5.80
   4 -12  -7   83.40    3.20
   4  12  -6    0.20    0.90
   4  12  -6   -0.50    0.80
   4  12  -6   -2.40    3.50
  -4  12   6   -0.70    0.80
  -4  12   6    0.00    4.10
  -4 -12   6    0.30    0.80
   4 -12  -6   -0.20    0.90
   4  12  -5   59.70    3.00
   4  12  -5   50.50    5.20
  -4  12   5   59.00    2.40
  -4  12   5   59.80    5.00
  -4 -12   5   63.40    2.90
   4 -12  -5   58.90    2.50
   4  12  -4   10.70    1.10
   4  12  -4   11.20    3.40
  -4  12   4   10.40    1.20
  -4  12   4    6.50    3.30
  -4 -12   4    9.10    1.40
   4 -12  -4   12.30    1.20
   4  12  -3    0.00    0.70
   4  12  -3   -3.70    3.40
  -4  12   3   -0.20    0.70
  -4 -12   3    0.50    1.10
   4 -12  -3    1.10    0.70
   4  12  -2    2.90    1.00
   4  12  -2    1.00    4.20
  -4  12   2    2.80    0.90
  -4 -12   2    2.90    1.00
   4 -12  -2    2.70    0.80
   4  12  -1   61.40    2.60
   4  12  -1   64.30   10.40
  -4  12   1   64.10    3.60
  -4 -12   1   58.80    2.70
   4 -12  -1   60.70    2.70
   4  12   0    9.50    0.90
   4  12   0   11.50    3.50
  -4  12   0    8.60    1.20
  -4 -12   0    9.00    0.90
   4 -12   0    9.00    0.90
   4  12   1   16.90    1.20
   4  12   1   14.70    3.80
  -4  12  -1   16.70    1.30
  -4 -12  -1   16.30    1.20
   4 -12   1   13.30    1.20
   4  12   2   -0.50    0.90
   4  12   2   -0.20    4.40
  -4  12  -2   -0.90    0.90
  -4 -12  -2    0.20    1.00
   4 -12   2    0.10    0.80
   4  12   3   23.20    1.40
   4  12   3   34.80    6.20
  -4  12  -3   23.30    1.50
  -4 -12  -3   24.60    1.60
   4 -12   3   24.50    2.00
   4  12   4   64.80    3.20
   4  12   4   54.40    6.00
  -4  12  -4   59.90    3.20
  -4 -12  -4   60.90    2.70
   4 -12   4   62.60    2.70
   4  12   5    0.70    0.80
   4  12   5   -0.30    4.60
  -4  12  -5    1.00    0.90
  -4 -12  -5    1.70    1.00
   4 -12   5    0.80    1.00
   4  12   6    3.10    0.80
   4  12   6    2.90    3.30
  -4  12  -6    2.80    1.10
  -4 -12  -6    2.70    1.10
   4 -12   6    1.70    0.80
   4  12   7   16.40    1.40
   4  12   7    9.70    4.30
  -4  12  -7   10.80    1.50
  -4  12  -7   15.20    6.90
  -4 -12  -7   14.80    1.40
   4 -12   7   14.30    1.30
   4  12   8   12.90    1.30
   4  12   8    0.40    3.90
  -4  12  -8   17.50    7.20
  -4 -12  -8   12.10    1.60
   4 -12   8   10.70    1.30
   4  12   9   17.40    1.50
   4  12   9    8.50    3.40
  -4  12  -9   14.30    5.70
   4 -12   9   15.70    1.60
   4  12  10   -0.70    0.70
  -4  12 -10  -10.40    8.00
   4 -12  10   -0.40    0.80
  -4  12 -11    2.40    5.00
   4 -12  11    2.90    1.40
   4 -12  12    0.30    2.20
   4  12  13   53.10    3.50
   4  12  14   -0.90    1.40
  -4  13  14   12.50    2.20
   4  13 -13    2.50    1.40
   4  13 -12    5.90    1.50
   4  13 -12    3.50    6.50
   4  13 -11    7.30    1.10
   4  13 -11    1.90    4.30
   4  13 -10    5.20    1.00
   4  13 -10    5.70    4.60
  -4  13  10    4.90    0.80
   4  13  -9   63.50    2.90
   4  13  -9   54.00    7.10
  -4  13   9   66.30    3.10
  -4  13   9   50.20    5.40
   4 -13  -9   65.10    2.70
   4  13  -8   87.40    3.90
   4  13  -8   90.30    8.80
  -4  13   8   87.40    3.40
  -4  13   8   81.90    7.00
   4 -13  -8   81.30    3.30
   4  13  -7    9.70    1.20
   4  13  -7    8.20    4.40
  -4  13   7   10.20    1.20
  -4  13   7    7.70    4.20
   4 -13  -7   10.60    1.10
   4  13  -6   10.80    1.40
   4  13  -6    6.90    5.70
  -4  13   6   12.00    1.20
  -4  13   6    4.30    4.70
   4 -13  -6   11.00    1.00
   4  13  -5  138.10    5.90
   4  13  -5  130.90    5.70
   4  13  -5  149.00   10.30
  -4  13   5  141.70    5.40
  -4  13   5  141.10    8.00
   4 -13  -5  138.20    5.40
   4  13  -4    1.90    1.30
   4  13  -4    1.50    5.50
  -4  13   4    1.50    0.70
  -4 -13   4    1.10    0.80
   4 -13  -4    2.30    0.90
   4  13  -3   86.20    4.20
   4  13  -3   82.50    7.70
  -4  13   3   85.10    3.40
  -4 -13   3   79.50    3.60
   4 -13  -3   87.30    3.90
   4  13  -2    6.80    0.90
   4  13  -2    6.30    3.50
  -4  13   2    7.90    1.40
  -4 -13   2    7.30    0.90
   4 -13  -2    6.10    0.90
   4  13  -1   21.50    1.70
   4  13  -1   17.00    5.30
  -4  13   1   20.30    1.40
  -4 -13   1   18.30    1.60
   4 -13  -1   19.50    1.60
   4  13   0   20.60    1.50
   4  13   0   14.50    5.10
  -4  13   0   19.80    1.70
  -4 -13   0   18.40    1.20
   4 -13   0   20.00    1.60
   4  13   1    0.00    1.00
   4  13   1    4.10    4.70
  -4  13  -1    0.50    1.20
  -4 -13  -1   -1.10    1.00
   4 -13   1    1.00    1.20
   4  13   2   -0.70    1.00
   4  13   2    2.30    4.50
  -4  13  -2   -1.60    0.90
  -4 -13  -2   -0.80    1.00
   4 -13   2   -0.20    1.20
   4  13   3    2.40    0.80
   4  13   3    0.90    3.90
  -4  13  -3    1.40    1.10
  -4 -13  -3    2.90    1.10
   4 -13   3    2.60    0.90
   4  13   4  113.90    4.30
   4  13   4  100.60    8.00
  -4 -13  -4  108.70    4.40
   4 -13   4  117.10    5.90
   4  13   5   54.80    2.80
   4  13   5   36.00    5.90
  -4 -13  -5   52.40    2.70
   4 -13   5   48.50    2.30
   4  13   6   74.80    3.10
   4  13   6   60.20    5.30
  -4 -13  -6   73.20    3.20
   4 -13   6   69.50    3.20
   4  13   7  162.10    6.20
   4  13   7  140.60    9.60
  -4  13  -7  162.50   10.40
  -4 -13  -7  152.80    6.20
   4 -13   7  153.50    6.10
   4  13   8    9.00    1.00
   4  13   8    5.20    4.60
  -4  13  -8    0.50    5.30
  -4 -13  -8   17.20    3.30
   4 -13   8    8.90    1.20
   4  13   9  133.60    5.70
   4  13   9   92.20    8.40
  -4  13  -9  132.00    9.80
   4 -13   9  130.80    6.00
  -4  13 -10   30.40    9.20
   4 -13  10   12.40    1.40
  -4  13 -11   92.60    9.70
   4 -13  11  111.30    5.40
   4 -13  12   13.90    1.50
   4  13  13   63.20    4.30
   4  14 -13   10.20    1.30
   4  14 -12   32.50    2.50
   4  14 -12   23.40    8.40
   4  14 -11    3.20    1.40
   4  14 -11    4.10    7.20
   4  14 -10   73.20    3.90
   4  14 -10   66.70    9.00
  -4  14  10   75.90    3.40
   4  14  -9    2.30    1.90
   4  14  -9   -5.10    6.70
  -4  14   9    0.60    0.60
  -4  14   9    2.50    4.40
   4  14  -8  107.50    4.40
   4  14  -8  105.20    8.70
  -4  14   8  115.50    4.20
  -4  14   8   91.80    7.80
   4 -14  -8  112.70    4.40
   4  14  -7   27.20    3.00
   4  14  -7   28.50    6.80
  -4  14   7   26.80    1.80
  -4  14   7   21.00    5.20
   4 -14  -7   24.20    1.60
   4  14  -6   19.40    1.70
   4  14  -6   15.00    5.10
  -4  14   6   18.80    1.40
  -4  14   6   12.50    3.80
   4 -14  -6   19.60    1.40
   4  14  -5    2.20    0.90
   4  14  -5   -0.70    4.20
  -4  14   5    0.90    1.00
   4 -14  -5    2.40    1.20
   4  14  -4    0.30    0.90
   4  14  -4   -1.10    3.90
  -4  14   4    1.30    1.30
   4 -14  -4    1.10    0.70
   4  14  -3    3.50    1.00
   4  14  -3    4.10    5.60
  -4  14   3    1.00    1.10
   4 -14  -3    2.60    0.80
   4  14  -2   -0.10    1.10
   4  14  -2   -1.00    5.00
  -4  14   2    1.70    0.90
   4 -14  -2    2.20    1.60
   4  14  -1   18.90    1.40
   4  14  -1   13.80    4.30
  -4  14   1   18.90    1.80
  -4 -14   1   18.10    1.50
   4 -14  -1   20.80    1.40
   4  14   0    1.80    0.80
   4  14   0   -0.10    3.50
  -4  14   0    1.90    0.90
  -4 -14   0    1.20    1.20
   4 -14   0    2.60    1.60
   4  14   1   93.60    3.60
   4  14   1  101.70    7.00
  -4 -14  -1   91.40    3.90
   4 -14   1   92.90    3.60
   4  14   2   98.20    3.70
   4  14   2   80.80    7.00
  -4 -14  -2   89.60    3.80
   4 -14   2   95.40    4.00
   4  14   3    3.00    1.00
   4  14   3    0.30    5.50
  -4 -14  -3    4.20    0.90
   4 -14   3    4.70    1.30
   4  14   4  113.60    4.40
   4  14   4   98.90    7.20
  -4 -14  -4  119.00    6.40
   4 -14   4  104.90    4.30
   4  14   5   61.70    2.90
   4  14   5   46.20    5.70
  -4 -14  -5   59.40    2.70
   4 -14   5   64.20    3.50
   4  14   6   23.70    1.40
   4  14   6   14.10    4.10
  -4 -14  -6   22.00    1.70
   4 -14   6   23.10    2.20
   4  14   7   10.00    1.20
   4  14   7    0.00    4.90
  -4 -14  -7    9.80    1.70
   4 -14   7   10.20    1.30
   4  14   8   29.20    1.70
   4  14   8   17.30    3.90
  -4  14  -8   27.00    8.40
   4 -14   8   27.20    2.10
   4  14   9    6.70    0.80
   4  14   9    0.70    3.20
  -4  14  -9    8.90    8.90
   4 -14   9    5.10    1.40
  -4  14 -10   48.30    8.50
   4 -14  10   51.80    2.90
  -4  14 -11    7.00   10.20
   4 -14  11   14.20    2.10
  -4  14 -12   11.40    1.60
   4 -14  12   12.80    3.40
   4  14  13    1.70    1.70
   4  15 -13    1.60    1.50
   4  15 -12    1.00    1.10
   4  15 -11    6.80    1.20
   4  15 -11    9.80    5.40
   4  15 -10   28.20    2.00
   4  15 -10   22.50    5.80
   4  15  -9   50.60    2.70
   4  15  -9   50.00    8.70
  -4  15   9   50.00    2.60
  -4  15   9   39.00    5.70
   4  15  -8    9.00    1.50
   4  15  -8    8.90    5.00
  -4  15   8   13.90    2.30
  -4  15   8    6.40    4.80
   4 -15  -8   10.30    1.30
   4  15  -7   45.70    2.30
   4  15  -7   37.60    7.50
  -4  15   7   46.30    2.30
  -4  15   7   27.80    5.90
   4 -15  -7   44.40    2.50
   4  15  -6   -1.00    1.00
   4  15  -6    2.60    5.10
  -4  15   6    1.00    1.30
  -4  15   6    3.10    4.30
   4 -15  -6   -0.20    0.70
   4  15  -5   76.30    3.80
   4  15  -5   61.10    6.70
  -4  15   5   77.80    3.50
   4 -15  -5   73.50    3.20
   4  15  -4   -1.10    1.10
   4  15  -4    2.10    4.10
  -4  15   4   -1.00    0.90
   4 -15  -4   -0.90    1.00
   4  15  -3  122.40    5.50
   4  15  -3  119.30    8.40
  -4  15   3  119.80    4.70
   4 -15  -3  120.50    4.80
   4  15  -2    0.10    1.20
   4  15  -2    3.10    6.20
   4 -15  -2   -0.30    0.80
   4  15  -1   79.80    3.60
   4  15  -1   67.50    6.80
   4 -15  -1   82.50    3.30
   4  15   0  170.50    8.20
   4  15   0  160.50   11.00
   4 -15   0  158.40    7.10
   4  15   1   23.00    1.70
   4  15   1   23.40    6.70
   4 -15   1   23.90    1.90
   4  15   2   22.70    2.10
   4  15   2   11.60    6.20
   4 -15   2   23.70    2.10
   4  15   3   20.50    1.30
   4  15   3   13.10    5.40
   4 -15   3   19.50    1.60
   4  15   4   39.80    2.00
   4  15   4   26.80    6.00
   4 -15   4   41.80    2.80
   4  15   5   53.20    2.40
   4  15   5   35.60    5.70
   4 -15   5   53.10    2.70
   4  15   6   30.30    1.70
   4  15   6   18.40    4.80
   4 -15   6   31.10    2.60
   4  15   7   23.70    2.50
   4  15   7    6.80    5.30
   4 -15   7   20.00    3.90
   4  15   8    2.90    0.80
   4  15   8   -4.80    3.40
  -4  15  -8   -2.50    5.70
   4 -15   8    3.20    2.10
   4  15   9    0.10    0.70
  -4  15  -9   -3.40    7.10
   4 -15   9    1.10    1.40
   4 -15  10   12.70    1.50
   4 -15  11   13.30    1.60
  -4  15 -12   -0.20    1.80
   4  16 -13   13.10    1.50
   4  16 -12   12.00    1.40
   4  16 -11    0.10    1.60
   4  16 -10   11.70    1.40
   4  16 -10    7.80    5.80
   4  16  -9    2.10    1.40
   4  16  -9    2.90    5.80
  -4  16   9    1.50    1.00
   4  16  -8   23.30    1.90
   4  16  -8   21.70    8.60
  -4  16   8   21.70    1.70
  -4  16   8   15.70    4.50
   4  16  -7    5.50    1.30
   4  16  -7    3.30    4.90
  -4  16   7    7.60    2.40
  -4  16   7    9.00    5.80
   4 -16  -7    5.20    0.90
   4  16  -6   57.70    3.10
   4  16  -6   44.70    6.70
   4 -16  -6   57.10    2.70
   4  16  -5   10.90    1.80
   4  16  -5   -0.90    7.00
   4 -16  -5   10.90    1.10
   4  16  -4  224.60    9.40
   4  16  -4  228.30   14.70
   4 -16  -4  224.20    8.00
   4  16  -3    3.70    1.30
   4  16  -3    2.00    4.50
   4 -16  -3    4.60    0.90
   4  16  -2    0.20    1.00
   4  16  -2    0.70    4.70
   4 -16  -2    1.40    1.30
   4  16  -1   16.10    1.90
   4  16  -1   10.30    6.30
   4 -16  -1   17.30    1.50
   4  16   0   -0.10    1.00
   4  16   0   -5.00    6.00
   4 -16   0    1.40    1.00
   4  16   1    0.10    0.90
   4  16   1   -1.60    4.30
   4 -16   1    0.00    1.10
   4  16   2   11.20    1.20
   4  16   2    0.50    4.60
   4 -16   2   12.80    1.50
   4  16   3    2.00    1.20
   4  16   3   -9.10    6.40
   4 -16   3    2.90    1.10
   4  16   4   15.70    1.30
   4  16   4    8.40    4.30
   4 -16   4   17.20    1.90
   4  16   5    6.80    1.40
   4  16   5    1.10    6.10
   4 -16   5    7.90    1.40
   4  16   6  102.20    5.20
   4  16   6   73.70    8.80
   4 -16   6   90.20    4.50
   4  16   7   30.40    2.80
   4  16   7   19.20    6.30
   4 -16   7   27.50    2.60
   4  16   8    3.60    0.90
   4  16   8    9.80    5.50
   4 -16   8    4.40    1.70
   4  16   9    1.30    0.90
   4 -16   9    2.00    1.50
   4 -16  10   -0.80    1.70
  -4  16 -11    7.60    1.70
   4 -16  11    9.50    2.50
  -4  16 -12    7.70    2.00
   4  17 -13    5.20    1.60
   4  17 -12   12.60    2.10
   4  17 -11    2.20    1.80
   4  17 -10   27.90    2.70
   4  17  -9   14.20    1.60
  -4  17   9   13.00    1.40
   4  17  -8    1.90    1.60
   4  17  -8    3.40    8.80
  -4  17   8    2.40    0.80
  -4  17   8   -5.50    6.00
   4  17  -7    4.00    1.20
   4  17  -7   -1.70    5.20
  -4  17   7    4.30    0.90
  -4  17   7   -3.60    6.50
   4 -17  -7    4.10    1.00
   4  17  -6   -0.50    1.30
   4  17  -6   10.30    6.20
   4 -17  -6   -0.60    1.10
   4  17  -5   10.50    1.70
   4  17  -5   11.80    8.10
   4 -17  -5    8.90    1.30
   4  17  -4    1.00    1.80
   4  17  -4   -3.60    7.20
   4 -17  -4   -0.10    0.90
   4  17  -3   -1.10    1.40
   4  17  -3   -2.30    4.80
   4 -17  -3    3.50    3.20
   4  17  -2    8.70    1.50
   4  17  -2    4.00    5.60
   4 -17  -2   10.30    1.20
   4  17  -1    1.90    1.90
   4  17  -1   -1.90    5.90
   4 -17  -1    2.10    1.30
   4  17   0  140.50    5.40
   4  17   0  131.10   10.00
   4 -17   0  141.60    5.40
   4  17   1   -0.20    1.00
   4  17   1   -4.70    4.40
   4 -17   1   -0.20    1.00
   4  17   2  131.30    4.70
   4  17   2  103.30    8.90
   4 -17   2  126.10    5.40
   4  17   3   40.20    2.10
   4  17   3   26.70    5.80
   4 -17   3   39.20    2.90
   4  17   4   52.70    3.30
   4  17   4   33.10    7.00
   4 -17   4   49.90    2.90
   4  17   5   20.50    1.50
   4  17   5   15.00    4.90
   4 -17   5   20.90    1.90
   4  17   6    7.60    1.10
   4  17   6    2.30    4.40
   4 -17   6    8.70    1.30
   4  17   7    3.20    0.90
   4  17   7    3.10    4.30
   4 -17   7    3.00    1.60
   4  17   8    0.70    1.20
   4  17   8    0.60    6.60
   4 -17   8    0.40    1.60
   4  17   9    9.90    1.30
   4 -17   9   10.30    2.10
   4 -17  10    4.00    1.90
  -4  17 -11    0.40    1.50
  -4  17 -12   -0.20    1.90
   4  18 -12   12.70    2.10
   4  18 -11    3.70    1.80
   4  18 -10    1.30    1.80
   4  18  -9    0.60    1.40
  -4  18   9   -0.40    1.10
   4  18  -8   33.70    2.80
  -4  18   8   32.50    2.00
  -4  18   8   18.10    5.70
   4  18  -7    3.10    1.20
  -4  18   7    2.50    1.30
  -4  18   7    0.70    6.70
   4  18  -6   39.30    3.00
  -4  18   6   43.60    2.40
   4 -18  -6   44.40    2.40
   4  18  -5    1.50    4.40
   4  18  -5   -5.00    8.00
   4 -18  -5   -0.30    1.70
   4  18  -4    6.20    1.70
   4  18  -4    3.80    8.10
   4 -18  -4    8.60    1.60
   4  18  -3   -2.00    1.70
   4  18  -3    4.00    4.90
   4 -18  -3    1.00    1.40
   4  18  -2   17.40    1.50
   4  18  -2   10.30    5.50
   4 -18  -2   18.10    1.60
   4  18  -1   38.20    2.60
   4  18  -1   33.80    8.80
   4 -18  -1   39.90    2.40
   4  18   0    5.80    1.70
   4  18   0    1.90    5.10
   4 -18   0    3.30    1.60
   4  18   1  104.20    4.10
   4  18   1  103.90   11.40
   4 -18   1  100.00    4.30
   4  18   2    1.80    1.20
   4  18   2    3.90    5.40
   4 -18   2    0.90    1.80
   4  18   3    4.50    1.40
   4  18   3    1.90    5.20
   4 -18   3    4.20    1.70
   4  18   4    3.10    1.50
   4  18   4    1.30    6.90
   4 -18   4    3.90    1.20
   4  18   5   22.40    1.70
   4  18   5    8.90    5.60
   4 -18   5   24.40    2.40
   4  18   6   27.80    2.30
   4  18   6   12.60    7.30
   4 -18   6   22.70    1.90
   4  18   7    1.10    1.40
   4  18   7    1.70    6.00
   4 -18   7    1.00    2.00
   4  18   8   16.00    1.60
   4 -18   8   20.60    2.60
   4 -18   9    1.40    2.30
  -4  18 -10    3.20    1.90
  -4  18 -11   12.90    2.40
  -4  18 -12   22.20    2.20
   4  19 -12    6.20    2.10
   4  19 -11    8.10    1.90
   4  19 -10   12.00    2.10
   4  19  -9    1.80    1.40
   4  19  -8   12.70    2.00
  -4  19   8   10.20    1.20
   4  19  -7   45.70    2.60
  -4  19   7   45.70    2.70
  -4  19   7   35.40    6.00
  -4  19   7   35.40    6.00
   4  19  -6    4.70    2.00
  -4  19   6    6.10    1.20
   4  19  -5   63.10    3.90
   4 -19  -5   61.70    3.40
   4  19  -4    2.00    2.00
   4 -19  -4   -0.10    1.60
   4  19  -3   69.80    3.70
   4 -19  -3   70.50    3.20
   4  19  -2   53.00    3.00
   4  19  -2   31.80    7.20
   4 -19  -2   49.50    2.80
   4  19  -1   30.60    2.50
   4  19  -1    7.70    7.70
   4 -19  -1   29.60    2.00
   4  19   0    6.20    1.40
   4  19   0    8.50    5.50
   4 -19   0   17.90    6.30
   4  19   1    2.70    1.60
   4  19   1   -2.70    5.10
   4 -19   1    3.70    2.00
   4  19   2   -0.60    1.40
   4  19   2    0.90    5.60
   4 -19   2    0.50    1.90
   4  19   3   50.70    2.70
   4  19   3   31.60    6.30
   4 -19   3   55.00    3.10
   4  19   4   44.40    2.30
   4  19   4   26.40    6.10
   4 -19   4   41.70    2.80
   4  19   5    6.80    1.50
   4  19   5    5.30    7.00
   4 -19   5    5.00    1.90
   4  19   6   18.50    2.60
   4  19   6    5.60    7.60
   4 -19   6   16.90    1.80
   4  19   7   17.20    1.60
   4  19   7    0.90    7.90
   4 -19   7   17.60    2.40
   4  19   8    3.50    1.50
   4 -19   8    3.60    1.90
  -4  19  -9   19.80    2.70
   4 -19   9   17.00    2.00
  -4  19 -10   11.10    2.30
   4  20 -11   11.30    2.90
   4  20 -10   16.20    2.50
   4  20  -9    3.60    1.40
   4  20  -8   11.60    2.80
  -4  20   8   11.80    1.50
   4  20  -7    1.00    1.80
  -4  20   7    2.30    1.60
  -4  20   7   -1.40    6.10
  -4  20   7   -1.40    6.10
   4  20  -6   21.20    2.00
  -4  20   6   23.90    2.10
   4  20  -5   50.60    3.00
  -4  20   5   51.10    2.60
   4  20  -4   11.20    2.00
  -4  20   4   14.10    1.70
   4 -20  -4   12.40    1.30
   4  20  -3   43.00    2.90
   4 -20  -3   42.70    2.40
   4  20  -2    0.30    1.20
   4 -20  -2    2.80    3.70
   4  20  -1   62.20    4.30
   4 -20  -1   61.60    3.20
   4  20   0    3.20    1.20
   4 -20   0    4.00    1.60
   4  20   1  115.20    4.80
   4 -20   1  111.30    5.00
   4  20   2   16.60    1.90
   4 -20   2   18.70    2.20
   4  20   3   82.20    3.80
   4 -20   3   79.10    4.60
   4  20   4   42.30    2.40
   4  20   4   12.20    5.90
   4 -20   4   36.50    2.70
   4  20   5    3.40    1.70
   4 -20   5    2.60    2.50
   4  20   6    0.50    1.10
   4 -20   6    1.50    2.10
   4  20   7   46.70    2.60
   4 -20   7   52.00    4.10
   4  20   8    6.90    1.30
  -4  20  -8   11.80    2.60
   4 -20   8    9.90    1.80
  -4  20  -9   11.40    1.80
   4  21 -10    1.60    2.60
   4  21  -9   11.20    1.70
   4  21  -8    7.00    2.30
  -4  21   8    5.20    1.30
   4  21  -7  107.60    5.10
  -4  21   7  114.50    5.80
   4  21  -6   13.40    1.60
  -4  21   6   14.30    1.60
   4  21  -5   43.60    2.70
  -4  21   5   42.60    2.50
   4  21  -4    1.40    2.40
  -4  21   4    1.20    1.10
   4  21  -3    3.80    1.30
  -4  21   3    4.20    1.20
   4 -21  -3    4.20    1.30
   4  21  -2    2.20    1.60
   4 -21  -2    6.00    2.90
   4  21  -1    8.30    2.20
   4 -21  -1    9.50    1.70
   4  21   0    0.10    1.20
   4 -21   0    1.10    1.30
   4  21   1   16.70    1.80
   4 -21   1   17.30    1.80
   4  21   2    6.20    1.40
   4 -21   2    5.20    1.40
   4  21   3    8.30    1.50
   4 -21   3    9.90    1.80
   4  21   4   19.10    1.70
   4 -21   4   20.30    2.30
   4  21   5    9.70    1.70
   4 -21   5   12.20    2.80
   4  21   6   26.70    2.00
  -4  21  -6   29.20    2.70
   4 -21   6   31.30    3.10
   4  21   7   38.10    3.90
  -4  21  -7   35.70    3.30
  -4  21  -8    2.10    1.60
   4  22  -8    0.60    2.00
   4  22  -7   19.10    2.50
  -4  22   7   30.00    4.50
   4  22  -6   76.00    4.00
  -4  22   6   69.00    3.90
  -4  22   5   10.20    1.90
   4  22  -4   -0.20    1.50
  -4  22   4    1.70    1.50
   4  22  -3    2.40    1.80
  -4  22   3    1.60    2.60
   4  22  -2   -1.80    2.10
  -4  22   2    0.70    2.10
   4  22  -1   17.40    2.00
  -4  22   1   15.50    1.80
   4 -22  -1   16.30    1.70
   4  22   0   28.00    2.80
  -4  22   0   25.80    2.70
   4 -22   0   26.10    2.20
   4  22   1   15.50    1.80
  -4  22  -1   15.60    1.90
   4 -22   1   15.50    2.10
   4  22   2    0.10    1.40
  -4  22  -2   -0.10    1.40
   4 -22   2    0.40    1.80
   4  22   3   42.50    3.70
  -4  22  -3   60.10    9.10
   4 -22   3   54.40   10.30
   4  22   4    1.30    1.40
  -4  22  -4    2.10    1.70
   4 -22   4    1.20    1.60
   4  22   5   26.90    2.70
  -4  22  -5   31.00    4.10
   4  22   6    0.60    1.40
  -4  22  -6    0.00    1.60
   4  22   7   50.00    3.60
  -4  23   7   28.70    2.90
  -4  23   6   13.70    1.90
   4  23  -5   28.40    2.80
  -4  23   5   27.40    3.10
   4  23  -4  104.10    7.00
  -4  23   4  105.60    5.40
   4  23  -3   25.80    3.10
  -4  23   3   27.20    2.70
   4  23  -2   -1.20    2.00
  -4  23   2   -1.00    1.40
   4  23  -1    0.00    1.30
  -4  23   1   -0.40    2.00
   4  23   0    3.30    2.00
  -4  23   0    2.60    1.40
   4  23   1    0.40    1.60
  -4  23  -1    0.70    1.50
   4  23   2   38.40    2.60
  -4  23  -2   40.00    3.20
   4  23   3   -0.20    1.80
  -4  23  -3    1.00    1.70
   4  23   4    2.00    1.30
  -4  23  -4    2.20    1.60
   4  23   5    6.30    3.90
   4  23   6   19.30    2.40
  -4  24   6   82.90    4.70
  -4  24   5    4.30    1.80
  -4  24   4   11.70    1.80
   4  24  -3    2.70    2.20
  -4  24   3   -1.00    1.90
   4  24  -2   -0.60    1.50
  -4  24   2   -0.50    1.50
   4  24  -1   16.30    2.90
  -4  24   1   20.20    2.60
   4  24   0   34.30    2.50
  -4  24   0   37.10    3.10
   4  24   1   28.10    3.00
  -4  24  -1   27.80    2.80
   4  24   2    2.40    1.50
   4  24   3    8.50    1.60
   4  24   4   -2.00    1.90
   4  24   5    4.10    2.80
   4  24   6   -0.70    1.50
  -4  25   6    2.50    1.90
  -4  25   5   -0.70    1.50
  -4  25   4   18.00    2.30
  -4  25   3   15.70    4.70
  -5   0  16   -0.40    1.20
  -5   0  15   26.70    2.30
  -5   0  14    0.60    1.40
  -5   0  13   46.30    3.00
   5   0 -12    0.20    0.40
   5   0 -12    1.50    2.20
  -5   0  12   -1.00    1.00
   5   0 -11    1.10    0.50
   5   0 -11    1.50    1.90
  -5   0  11    1.00    0.50
  -5   0  11    1.80    0.80
   5   0 -10   -0.20    0.50
   5   0 -10    0.10    2.40
  -5   0  10    0.00    0.50
  -5   0  10    0.60    1.10
   5   0  -9   88.30    3.40
   5   0  -9  100.50    5.60
  -5   0   9   89.50    3.70
  -5   0   9   85.80    3.70
  -5   0   9   90.60    5.50
   5   0  -8    0.30    0.50
   5   0  -8   -0.10    2.30
  -5   0   8   -0.30    0.50
  -5   0   8   -0.20    0.60
  -5   0   8   10.90    6.40
   5   0  -7  137.40    5.30
   5   0  -7  148.10    7.40
  -5   0   7  132.80    4.90
  -5   0   7  144.80    5.30
  -5   0   7  139.00    7.40
   5   0  -6    0.50    0.80
   5   0  -6   -2.30    1.90
  -5   0   6   -0.40    0.60
  -5   0   6    0.20    0.40
  -5   0   6    0.20    2.50
   5   0  -5    8.40    0.80
   5   0  -5    6.00    2.70
  -5   0   5    8.90    0.70
  -5   0   5    9.00    0.70
  -5   0   5    8.20    2.10
   5   0  -4   -0.20    0.60
   5   0  -4    1.30    2.30
  -5   0   4    0.10    0.50
  -5   0   4   -0.20    0.40
  -5   0   4    1.10    2.40
   5   0  -3    7.30    0.90
   5   0  -3    7.20    2.50
  -5   0   3    8.10    0.80
  -5   0   3    7.30    0.50
  -5   0   3    7.20    2.00
   5   0  -2    0.10    0.40
   5   0  -2    0.90    1.90
  -5   0   2    0.70    0.80
  -5   0   2   -1.70    2.60
   5   0  -1  167.20    6.20
   5   0  -1  181.70    8.30
  -5   0   1  164.30    6.10
  -5   0   1  177.00    8.10
   5   0   0    0.20    0.40
   5   0   0   -0.10    1.80
  -5   0   0   -0.30    0.40
  -5   0   0   -1.10    2.00
   5   0   1   74.50    2.90
   5   0   1   68.50    5.00
  -5   0  -1   71.80    3.00
  -5   0  -1   81.30    5.00
   5   0   2   -0.60    0.50
   5   0   2   -1.80    1.90
  -5   0  -2    0.00    0.60
  -5   0  -2   -1.90    2.00
   5   0   3  116.60    5.70
   5   0   3  111.80    4.80
   5   0   3  117.70    7.30
  -5   0  -3  107.70    4.20
  -5   0  -3  132.10    9.80
   5   0   4   -0.30    0.60
   5   0   4   -0.10    0.30
   5   0   4   -1.80    2.70
  -5   0  -4    0.20    0.50
  -5   0  -4   -0.20    2.30
   5   0   5   10.50    1.00
   5   0   5    9.00    0.70
   5   0   5    7.20    2.40
  -5   0  -5    8.70    0.90
  -5   0  -5    8.80    2.70
   5   0   6    0.20    0.80
   5   0   6   -0.40    0.60
   5   0   6    1.00    2.00
  -5   0  -6    0.00    0.50
  -5   0  -6   -0.30    2.10
   5   0   7  341.00   13.40
   5   0   7  325.10   12.40
   5   0   7  329.70   15.50
  -5   0  -7  324.70   11.50
  -5   0  -7  343.30   15.40
   5   0   8   -0.90    0.70
   5   0   8   -0.20    0.60
  -5   0  -8    0.10    0.80
  -5   0  -8   -1.20    2.40
   5   0   9   89.50    3.90
   5   0   9   90.50    3.70
  -5   0  -9   93.20    4.90
  -5   0  -9  106.30    7.60
   5   0  10   -0.40    0.60
   5   0  10   -0.20    1.60
  -5   0 -10   -0.80    1.10
  -5   0 -10    0.30    3.50
   5   0  11  112.10    5.20
   5   0  11  107.50    5.00
  -5   0 -11  121.60    7.80
   5   0  12   -0.30    0.80
   5   0  13  180.00    8.40
   5   0  14   -0.10    1.50
  -5   1  16    3.80    1.80
  -5  -1  16    2.80    1.30
  -5   1  15  100.90    5.30
  -5  -1  15  103.50    5.70
  -5   1  14    1.90    1.20
  -5  -1  14    0.90    1.20
  -5   1  13   58.30    3.10
  -5  -1  13   58.60    3.20
   5   1 -12   18.50    1.10
   5   1 -12   17.60    2.90
  -5   1  12   18.20    1.90
  -5  -1  12   17.90    1.80
   5  -1 -12   18.90    1.00
   5   1 -11    1.70    0.60
   5   1 -11    3.60    2.40
  -5   1  11    2.00    0.40
  -5   1  11    0.90    1.20
  -5  -1  11    1.90    0.60
  -5  -1  11    1.80    0.80
   5  -1 -11    2.00    0.50
   5  -1 -11    2.30    2.30
   5   1 -10   65.90    2.80
   5   1 -10   67.10    5.00
  -5   1  10   70.40    3.20
  -5   1  10   65.60    4.40
  -5  -1  10   69.90    2.80
  -5  -1  10   67.60    3.30
   5  -1 -10   67.20    3.00
   5  -1 -10   70.40    4.30
   5   1  -9   53.30    2.20
   5   1  -9   53.60    4.70
  -5   1   9   56.90    2.40
  -5   1   9   58.70    2.50
  -5   1   9   52.30    4.20
  -5  -1   9   58.00    2.50
  -5  -1   9   59.20    2.60
  -5  -1   9   50.00    4.40
   5  -1  -9   53.40    2.30
   5  -1  -9   53.00    4.10
   5   1  -8   60.70    2.60
   5   1  -8   60.30    4.70
  -5   1   8   64.40    2.60
  -5   1   8   66.90    2.70
  -5   1   8   65.70    4.90
  -5  -1   8   66.50    2.90
  -5  -1   8   69.50    2.80
  -5  -1   8   70.80   10.00
   5  -1  -8   63.00    2.60
   5  -1  -8   70.80    4.50
   5   1  -7   29.80    1.40
   5   1  -7   38.50    3.60
  -5   1   7   27.70    1.40
  -5   1   7   27.20    1.40
  -5   1   7   27.50    3.60
  -5  -1   7   29.60    1.40
  -5  -1   7   26.90    1.70
  -5  -1   7   27.20    3.70
   5  -1  -7   29.70    1.50
   5  -1  -7   30.70    3.40
   5   1  -6    0.60    0.40
   5   1  -6    0.50    1.60
  -5   1   6    0.70    0.60
  -5   1   6    0.00    0.60
  -5   1   6    0.50    2.40
  -5  -1   6    0.40    0.40
  -5  -1   6    0.90    0.50
  -5  -1   6   -0.60    1.90
   5  -1  -6    0.90    0.80
   5  -1  -6    0.40    2.30
   5   1  -5    2.80    0.60
   5   1  -5    2.70    1.70
  -5   1   5    3.00    0.60
  -5   1   5    2.80    0.50
  -5   1   5    2.90    2.50
  -5  -1   5    3.10    0.60
  -5  -1   5    3.10    0.60
  -5  -1   5    0.00    1.80
   5  -1  -5    3.50    0.50
   5  -1  -5    3.60    2.40
   5   1  -4   23.00    1.30
   5   1  -4   23.60    1.10
   5   1  -4   22.30    3.00
  -5   1   4   23.30    1.10
  -5   1   4   23.40    1.10
  -5   1   4   23.80    2.80
  -5  -1   4   23.40    1.20
  -5  -1   4   25.50    3.80
   5  -1  -4   23.90    1.10
   5  -1  -4   20.00    2.50
   5   1  -3   77.00    3.20
   5   1  -3   82.20    3.10
   5   1  -3   84.50    5.20
  -5   1   3   77.40    3.10
  -5   1   3   83.40    3.10
  -5   1   3   79.10    4.60
  -5  -1   3   77.60    3.10
  -5  -1   3   84.80    5.50
   5  -1  -3   78.80    3.20
   5  -1  -3   86.80    5.30
   5   1  -2   25.40    1.30
   5   1  -2   23.10    1.00
   5   1  -2   28.50    3.30
  -5   1   2   25.20    1.20
  -5   1   2   23.70    1.10
  -5   1   2   23.30    2.50
  -5  -1   2   23.00    1.30
  -5  -1   2   21.50    3.00
   5  -1  -2   23.60    1.50
   5  -1  -2   21.50    3.30
   5   1  -1   25.30    1.60
   5   1  -1   25.10    1.10
   5   1  -1   28.90    3.60
  -5   1   1   25.20    1.20
  -5   1   1   28.60    3.00
  -5  -1   1   25.80    1.40
  -5  -1   1   26.10    3.50
   5  -1  -1   24.80    1.30
   5  -1  -1   27.90    3.50
   5   1   0   14.80    1.00
   5   1   0   14.50    2.70
  -5   1   0   14.90    1.00
  -5   1   0   14.20    2.40
  -5  -1   0   13.90    1.30
  -5  -1   0   12.20    3.10
   5  -1   0   14.80    1.40
   5  -1   0   15.20    3.00
   5   1   1  287.50   10.10
   5   1   1  280.20    9.70
   5   1   1  300.70   12.80
  -5   1  -1  276.10   10.20
  -5   1  -1  313.60   12.90
  -5  -1  -1  275.00   10.20
  -5  -1  -1  317.00   13.20
   5  -1   1  293.80   12.20
   5  -1   1  303.40   12.80
   5   1   2   98.50    3.80
   5   1   2   97.70    3.80
   5   1   2  107.70    5.90
  -5   1  -2   94.70    4.00
  -5   1  -2  117.80    6.60
  -5  -1  -2   93.30    3.80
  -5  -1  -2  108.40    5.90
   5  -1   2   97.10    4.00
   5  -1   2  102.70    5.40
   5   1   3   31.40    2.80
   5   1   3   31.60    1.60
   5   1   3   33.20    4.00
  -5   1  -3   33.20    1.70
  -5   1  -3   34.30    5.60
  -5  -1  -3   30.80    1.60
  -5  -1  -3   33.70    6.00
   5  -1   3   32.60    1.80
   5  -1   3   29.20    3.90
   5   1   4   44.70    2.40
   5   1   4   43.00    1.70
   5   1   4   36.70    4.10
  -5   1  -4   41.90    1.90
  -5   1  -4   44.50    4.40
  -5  -1  -4   40.70    2.00
  -5  -1  -4   37.10    3.60
   5  -1   4   43.50    2.40
   5  -1   4   44.60    4.70
   5   1   5  486.70   17.20
   5   1   5  473.10   16.70
   5   1   5  477.10   20.60
  -5   1  -5  473.90   16.40
  -5   1  -5  517.00   21.30
  -5  -1  -5  481.30   19.80
  -5  -1  -5  528.10   21.50
   5  -1   5  488.00   19.50
   5  -1   5  483.10   17.70
   5  -1   5  490.90   21.80
   5   1   6   25.20    1.70
   5   1   6   24.50    1.60
   5   1   6   19.00    3.40
  -5   1  -6   22.90    1.30
  -5   1  -6   21.30    3.00
  -5  -1  -6   24.00    1.40
  -5  -1  -6   26.70    3.40
   5  -1   6   24.30    1.40
   5  -1   6   21.40    1.30
   5  -1   6   17.50    3.00
   5   1   7  174.90    6.50
   5   1   7  173.60    6.80
   5   1   7  173.30    9.00
  -5   1  -7  172.20    6.50
  -5   1  -7  194.40   10.30
  -5  -1  -7  163.70    7.10
  -5  -1  -7  182.00    9.10
   5  -1   7  177.30    6.60
   5  -1   7  166.10    7.30
   5   1   8    8.20    0.90
   5   1   8    8.50    1.30
   5   1   8    7.00    2.40
  -5   1  -8    7.70    1.30
  -5   1  -8    5.10    3.00
  -5  -1  -8    9.10    1.00
  -5  -1  -8    8.90    2.80
   5  -1   8    8.60    1.00
   5  -1   8    7.60    0.80
   5   1   9    5.00    0.60
   5   1   9    4.20    0.70
  -5   1  -9    5.90    1.50
  -5   1  -9   -1.70    3.90
  -5  -1  -9   11.80    3.90
  -5  -1  -9    9.70    3.70
   5  -1   9    5.90    0.80
   5  -1   9    4.90    0.80
   5   1  10   64.00    2.70
   5   1  10   57.30    3.40
  -5   1 -10   58.00    3.20
  -5   1 -10   61.70    5.60
  -5  -1 -10   69.70    3.60
  -5  -1 -10   61.80    5.80
   5  -1  10   63.90    3.10
   5  -1  10   61.10    3.50
   5   1  11   33.70    2.00
   5   1  11   29.90    2.00
  -5   1 -11   35.60    5.10
  -5  -1 -11   36.80    5.00
   5  -1  11   35.90    1.90
   5  -1  11   28.50    1.90
   5   1  12   14.90    1.40
   5  -1  12   15.00    1.50
   5   1  13    4.00    1.30
   5   1  14    1.10    1.10
   5   1  15    9.80    1.50
  -5   2  16    0.20    1.30
  -5   2  15    4.70    1.50
  -5   2  14   78.50    4.20
  -5  -2  14   76.30    4.30
  -5   2  13   -0.40    1.70
  -5  -2  13    1.80    1.30
   5   2 -12   15.70    0.90
   5   2 -12   15.80    2.90
  -5   2  12   19.60    2.20
  -5  -2  12   18.00    1.80
   5  -2 -12   15.30    0.90
   5   2 -11   31.70    1.60
   5   2 -11   26.70    3.40
  -5   2  11   31.70    1.40
  -5   2  11   33.30    2.00
  -5  -2  11   31.80    2.00
   5  -2 -11   29.00    1.40
   5   2 -10    0.30    0.60
   5   2 -10    2.90    2.50
  -5   2  10    0.80    0.40
  -5   2  10    1.00    1.20
  -5   2  10    0.10    2.00
  -5  -2  10    0.70    0.50
  -5  -2  10    1.10    0.80
   5  -2 -10    0.90    0.50
   5  -2 -10    1.60    2.10
   5   2  -9    8.20    0.80
   5   2  -9   13.30    3.00
  -5   2   9    8.60    0.90
  -5   2   9    7.30    1.10
  -5   2   9    3.50    2.60
  -5  -2   9    8.40    0.70
  -5  -2   9    7.60    1.00
   5  -2  -9    8.90    0.80
   5  -2  -9   10.60    2.50
   5   2  -8   23.90    1.20
   5   2  -8   19.40    3.40
  -5   2   8   23.80    1.30
  -5   2   8   20.40    1.20
  -5   2   8   16.60    3.00
  -5  -2   8   24.40    1.40
  -5  -2   8   19.50    1.30
  -5  -2   8   19.40    3.60
   5  -2  -8   24.20    1.30
   5  -2  -8   22.50    3.30
   5   2  -7  143.30    5.30
   5   2  -7  140.10    5.90
   5   2  -7  147.80    8.00
  -5   2   7  143.00    5.70
  -5   2   7  145.10    5.40
  -5   2   7  145.60    7.90
  -5  -2   7  147.40    5.70
  -5  -2   7  150.90    5.90
  -5  -2   7  147.10    7.80
   5  -2  -7  141.70    5.40
   5  -2  -7  147.30    7.60
   5   2  -6    1.70    0.70
   5   2  -6    0.50    0.60
   5   2  -6    0.10    2.70
  -5   2   6    1.20    0.40
  -5   2   6    1.00    0.50
  -5   2   6   -1.00    1.80
  -5  -2   6    1.30    0.50
  -5  -2   6   -1.00    1.90
   5  -2  -6    1.00    0.70
   5  -2  -6    2.20    2.40
   5   2  -5   59.60    2.50
   5   2  -5   61.40    2.70
   5   2  -5   63.10    4.70
  -5   2   5   59.80    2.30
  -5   2   5   63.80    2.50
  -5   2   5   56.20    3.90
  -5  -2   5   61.30    2.60
  -5  -2   5   53.50    4.80
   5  -2  -5   58.60    2.30
   5  -2  -5   57.80    4.40
   5   2  -4   -0.20    0.60
   5   2  -4    0.10    0.40
   5   2  -4    0.00    2.60
  -5   2   4    0.00    0.60
  -5   2   4    0.00    0.50
  -5   2   4    0.60    2.40
  -5  -2   4   -0.20    0.40
  -5  -2   4   -0.90    1.80
   5  -2  -4   -0.10    0.60
   5  -2  -4    1.30    1.70
   5   2  -3  325.70   12.70
   5   2  -3  322.20   11.10
   5   2  -3  339.40   14.90
  -5   2   3  317.90   11.60
  -5   2   3  327.30   11.40
  -5   2   3  339.30   16.10
  -5  -2   3  323.30   11.50
  -5  -2   3  363.30   14.80
   5  -2  -3  333.80   11.40
   5  -2  -3  354.60   13.80
   5   2  -2   72.90    3.20
   5   2  -2   72.40    2.80
   5   2  -2   85.10    5.80
  -5   2   2   73.80    2.90
  -5   2   2   72.10    2.70
  -5   2   2   76.00    4.50
  -5  -2   2   73.00    2.80
  -5  -2   2   72.50    4.60
   5  -2  -2   72.00    2.90
   5  -2  -2   80.40    4.80
   5   2  -1  222.50    7.80
   5   2  -1  226.50    8.00
   5   2  -1  233.10   11.80
  -5   2   1  222.60    7.90
  -5   2   1  226.10    7.80
  -5   2   1  233.50   11.90
  -5  -2   1  213.60    7.70
  -5  -2   1  241.20   11.00
   5  -2  -1  223.60    8.10
   5  -2  -1  230.80    9.80
   5   2   0  171.80    7.50
   5   2   0  180.30    8.60
  -5   2   0  163.00    6.20
  -5   2   0  178.10    8.50
  -5  -2   0  164.60    6.10
  -5  -2   0  178.10    8.10
   5  -2   0  173.40    6.50
   5  -2   0  171.00    8.10
   5   2   1  149.10    5.40
   5   2   1  150.10    7.20
  -5   2  -1  142.30    5.60
  -5   2  -1  161.20    7.90
  -5  -2  -1  144.60    5.50
  -5  -2  -1  169.50    7.30
   5  -2   1  148.40    5.40
   5  -2   1  152.30    7.90
   5   2   2   10.30    0.90
   5   2   2   11.60    2.90
  -5   2  -2   10.50    0.80
  -5   2  -2    8.50    3.40
  -5  -2  -2   10.90    1.20
  -5  -2  -2    8.40    3.00
   5  -2   2   10.60    0.80
   5  -2   2   11.40    2.40
   5   2   3   99.00    5.20
   5   2   3   94.20    3.60
   5   2   3   92.00    6.50
  -5   2  -3   94.50    4.00
  -5   2  -3  102.30    6.40
  -5  -2  -3   93.80    3.80
  -5  -2  -3  100.50    6.00
   5  -2   3   94.70    5.20
   5  -2   3   86.10    6.10
   5   2   4   61.60    2.70
   5   2   4   63.90    3.00
   5   2   4   58.70    4.50
  -5   2  -4   62.40    2.60
  -5   2  -4   67.00    4.60
  -5  -2  -4   63.30    2.80
  -5  -2  -4   65.70    4.80
   5  -2   4   61.50    2.60
   5  -2   4   59.10    5.10
   5   2   5    6.50    0.70
   5   2   5    6.30    0.60
   5   2   5    5.30    2.40
  -5   2  -5    5.40    0.80
  -5   2  -5    8.30    3.50
  -5  -2  -5    5.10    0.90
  -5  -2  -5    3.80    3.10
   5  -2   5    5.90    0.70
   5  -2   5    1.30    3.10
   5   2   6  203.60    8.60
   5   2   6  189.20    6.90
   5   2   6  189.30    9.90
  -5   2  -6  187.70    6.90
  -5   2  -6  209.30   10.00
  -5  -2  -6  196.20    7.50
  -5  -2  -6  198.90    9.50
   5  -2   6  195.50    7.30
   5   2   7   66.10    3.00
   5   2   7   64.70    2.60
   5   2   7   64.60    4.90
  -5   2  -7   62.00    2.80
  -5   2  -7   76.80    5.60
  -5  -2  -7   65.50    3.00
  -5  -2  -7   77.50    5.10
   5  -2   7   69.60    3.60
   5   2   8   62.50    2.80
   5   2   8   64.40    3.30
   5   2   8   65.10    4.80
  -5   2  -8   61.50    3.20
  -5   2  -8   71.20    5.40
  -5  -2  -8   67.30    3.30
  -5  -2  -8   76.20    5.70
   5  -2   8   63.50    2.70
   5   2   9    2.10    0.60
   5   2   9    1.50    0.80
   5   2   9    1.30    3.00
  -5   2  -9    2.80    1.30
  -5   2  -9   -1.00    3.70
  -5  -2  -9   22.60    4.80
  -5  -2  -9    6.80    4.50
   5  -2   9    2.80    1.40
   5   2  10    1.30    0.50
   5   2  10    1.10    1.60
  -5   2 -10    3.10    1.10
  -5   2 -10    0.70    3.90
  -5  -2 -10    2.20    1.20
  -5  -2 -10    1.40    3.60
   5  -2  10    1.40    0.80
   5   2  11   23.50    1.60
   5   2  11   23.40    1.50
  -5   2 -11   23.00    5.10
  -5  -2 -11   20.30    4.60
   5  -2  11   25.30    1.60
   5   2  12   -0.20    1.70
   5  -2  12   -0.20    0.70
   5   2  13  124.10    6.00
   5   2  14    5.70    1.60
   5   2  15   27.80    2.40
  -5   3  16   12.80    1.60
  -5   3  15   15.40    1.90
  -5   3  14    4.20    1.30
  -5   3  13    1.90    1.20
   5   3 -12   21.40    1.20
   5   3 -12   25.00    3.20
  -5   3  12   21.50    1.70
   5   3 -11   22.90    1.30
   5   3 -11   17.70    3.80
  -5   3  11   20.80    1.10
  -5   3  11   17.80    1.40
  -5   3  11   16.50    2.30
  -5  -3  11   20.60    1.20
   5  -3 -11   21.60    1.10
   5   3 -10   26.50    1.50
   5   3 -10   23.70    3.80
  -5   3  10   27.70    1.30
  -5   3  10   24.50    1.80
  -5   3  10   17.20    2.60
  -5  -3  10   24.40    1.30
   5  -3 -10   25.00    1.30
   5   3  -9  139.80    5.30
   5   3  -9  140.40    6.30
   5   3  -9  144.70    7.50
  -5   3   9  150.50    5.90
  -5   3   9  150.60    5.80
  -5   3   9  150.90    8.00
  -5  -3   9  149.50    5.30
   5  -3  -9  142.50    5.50
   5  -3  -9  148.30    7.30
   5   3  -8  103.20    4.10
   5   3  -8  104.60    4.30
   5   3  -8  113.20    6.60
  -5   3   8  106.70    3.90
  -5   3   8  107.60    4.10
  -5   3   8  107.10    6.50
  -5  -3   8  118.80    6.60
  -5  -3   8  108.90    7.00
   5  -3  -8  105.40    4.30
   5  -3  -8  104.10    5.90
   5   3  -7    1.40    0.50
   5   3  -7    2.00    0.50
   5   3  -7    1.50    2.00
  -5   3   7    1.10    0.40
  -5   3   7    2.60    0.90
  -5   3   7   -0.80    2.40
  -5  -3   7    2.10    0.90
  -5  -3   7   -1.40    2.80
   5  -3  -7    1.10    0.60
   5  -3  -7    1.90    1.60
   5   3  -6   67.80    2.90
   5   3  -6   67.60    2.90
   5   3  -6   69.60    5.40
  -5   3   6   68.50    2.70
  -5   3   6   68.50    2.70
  -5   3   6   62.60    4.80
  -5  -3   6   67.10    2.60
  -5  -3   6   68.60    5.30
   5  -3  -6   71.60    2.90
   5  -3  -6   66.30    5.00
   5   3  -5   -0.10    0.60
   5   3  -5    0.30    0.50
   5   3  -5    1.30    2.70
  -5   3   5    0.10    0.60
  -5   3   5    0.90    0.50
  -5   3   5   -1.80    2.30
  -5  -3   5    0.40    0.60
  -5  -3   5    1.00    3.00
   5  -3  -5    0.80    0.40
   5  -3  -5    0.00    1.60
   5   3  -4   18.50    1.20
   5   3  -4   19.10    0.90
   5   3  -4   18.10    3.20
  -5   3   4   19.00    1.10
  -5   3   4   18.30    0.90
  -5   3   4   13.30    3.00
  -5  -3   4   18.40    1.00
  -5  -3   4   13.90    2.60
   5  -3  -4   18.00    1.20
   5  -3  -4   16.70    3.40
   5   3  -3   62.30    3.00
   5   3  -3   54.60    2.00
   5   3  -3   54.30    4.30
  -5   3   3   55.30    2.40
  -5   3   3   55.00    4.50
  -5  -3   3   56.10    2.20
  -5  -3   3   60.40    4.40
   5  -3  -3   56.00    2.50
   5  -3  -3   51.70    4.80
   5   3  -2  109.00    4.50
   5   3  -2  107.00    4.00
   5   3  -2  115.40    6.70
  -5   3   2  101.00    3.90
  -5   3   2  117.90    5.90
  -5  -3   2  102.70    4.50
  -5  -3   2  110.20    6.80
   5  -3  -2  105.90    5.70
   5  -3  -2  109.90    5.90
   5   3  -1  295.40    9.90
   5   3  -1  282.00   15.00
  -5   3   1  271.30    9.70
  -5   3   1  293.60   14.90
  -5  -3   1  280.50   10.10
  -5  -3   1  303.70   13.10
   5  -3  -1  279.30    9.90
   5  -3  -1  298.50   12.20
   5   3   0  261.90   10.10
   5   3   0  275.60   12.50
  -5   3   0  250.50    9.10
  -5   3   0  272.70   11.50
  -5  -3   0  251.60    9.10
  -5  -3   0  277.00   12.50
   5  -3   0  262.70    9.20
   5  -3   0  259.30   10.80
   5   3   1    0.00    0.60
   5   3   1    1.50    1.90
  -5   3  -1    0.80    0.50
  -5   3  -1    0.20    0.20
  -5   3  -1    1.10    2.00
  -5  -3  -1   -0.30    0.60
  -5  -3  -1   -2.90    2.10
   5  -3   1   -0.10    0.50
   5  -3   1    0.00    1.90
   5   3   2   -0.50    0.70
   5   3   2   -0.80    1.90
  -5   3  -2    0.10    0.40
  -5   3  -2    0.40    0.30
  -5   3  -2    0.10    2.20
  -5  -3  -2    0.40    0.40
  -5  -3  -2   -1.10    2.00
   5  -3   2   -0.30    0.50
   5  -3   2   -0.10    2.00
   5   3   3   38.50    2.60
   5   3   3   28.30    3.80
  -5   3  -3   32.80    2.20
  -5   3  -3   32.90    1.80
  -5   3  -3   30.60    3.40
  -5  -3  -3   33.90    1.80
  -5  -3  -3   29.00    4.10
   5  -3   3   40.50    2.90
   5  -3   3   28.30    3.90
   5   3   4    7.00    0.70
   5   3   4    4.70    2.30
  -5   3  -4    6.90    0.70
  -5   3  -4    5.90    0.60
  -5   3  -4    6.40    2.80
  -5  -3  -4    7.80    0.80
  -5  -3  -4    5.20    3.00
   5  -3   4    7.30    0.70
   5  -3   4    8.50    2.70
   5   3   5    1.20    0.50
   5   3   5    1.50    0.50
   5   3   5    0.30    2.10
  -5   3  -5    1.40    0.90
  -5   3  -5    3.50    3.30
  -5  -3  -5    1.30    0.50
  -5  -3  -5    2.00    2.20
   5  -3   5    1.00    0.80
   5   3   6   49.90    2.30
   5   3   6   49.70    2.70
   5   3   6   46.40    4.10
  -5   3  -6   50.90    2.80
  -5   3  -6   51.20    5.00
  -5  -3  -6   49.90    3.00
  -5  -3  -6   51.20    5.50
   5  -3   6   46.80    2.20
   5   3   7    0.50    0.60
   5   3   7    0.90    0.70
   5   3   7    0.80    3.50
  -5   3  -7    1.60    0.80
  -5   3  -7   -5.20    3.80
  -5  -3  -7    1.30    0.80
  -5  -3  -7    1.50    3.10
   5  -3   7    0.80    0.50
[truncated: 6,387,863 more chars]
